# Supplementary material for: A vast Caledonian fan and an Ediacaran arc: The contrasting provenance of Devonian clastics of Brunia (Bohemian Massif)
Source: Copernicus journal article supplement (doi:10.5194/egusphere-2026-86), 2026-01-16
Supplement: Supplementary file 2 [file S2. Isotopic data.xlsx]

## Sheet: U-Pb Isotopic data
Section S2. Complete zircon isotopic data
			Concentrations (ppm)				U-Pb Isotopic ratios									Dates (Ma)									Concordance
Sample	Spot		Th	U	Th/U		207Pb/235U	± 2s abs	206Pb/238U	± 2s abs	207Pb/206Pb	± 2s abs	rho 6/8 v 7/5	rho 7/6 v 8/6		207Pb/235U	± 2s abs	206Pb/238U	± 2s abs	207Pb/206Pb	± 2s abs	Concordia age	± 2s abs		Concordia distance	% Disc 6/8 vs 7/6		For Hf
24BR1	1		66.3893	125.279	0.529932		0.83069	0.0519261	0.101499	0.00298919	0.0594124	0.00230233	0.186672	0.309818		614	28.8	623.2	17.5	581.2	84.2	621.1	16		-1.4	-7.22643
24BR1	2		51.0718	104.362	0.48937		0.786185	0.0489685	0.0975185	0.00290211	0.0586638	0.0023083	0.109093	0.3822		589	27.8	599.8	17	553.7	85.8	597.1	15.2		-1.5	-8.32581
24BR1	3		137.491	162.965	0.843688		0.813929	0.050866	0.0984042	0.00289838	0.0600016	0.00228664	0.219565	0.280294		604.7	28.5	605	17	602.7	82.5	605	15.9		-0.081	-0.381616		x
24BR1	4		72.7141	102.978	0.706114		0.804861	0.0514612	0.0996148	0.00319994	0.0590181	0.00246169	0.183691	0.395389		599.6	29	612.2	18.8	566.8	90.8	608.9	16.9		-1.4	-8.00988		x
24BR1	5		34.4243	60.8842	0.565407		0.822894	0.0558774	0.0999231	0.00326734	0.0596706	0.00281755	0.221094	0.349138		609.7	31.1	614	19.1	590.7	102.4	613	17.7		-0.78	-3.94447
24BR1	6		66.6856	74.2585	0.898021		0.795151	0.0510093	0.0975327	0.00301342	0.0591464	0.0025726	-0.00857398	0.488882		594.1	28.9	599.9	17.7	571.5	94.6	598.3	15		-0.92	-4.96938
24BR1	7		132.542	169.363	0.782593		0.813535	0.0497971	0.0996254	0.00295113	0.0593953	0.0022112	0.141951	0.387972		604.4	27.9	612.2	17.3	580.6	80.9	610.3	15.5		-1	-5.44265		x
24BR1	8		27.393	34.6609	0.790313		0.827386	0.0608313	0.0972399	0.00320617	0.0619775	0.00341492	0.23756	0.282485		612.2	33.8	598.2	18.8	672.4	117.9	600.5	17.9		2.6	11.0351
24BR1	9		94.2913	124.711	0.756078		0.813517	0.0510494	0.0978559	0.00297905	0.0602413	0.00225158	0.331113	0.196972		604.4	28.6	601.8	17.5	611.3	80.8	602.3	16.8		0.31	1.55407
24BR1	10		33.1701	48.2453	0.68753		0.815436	0.0558517	0.0966426	0.00321393	0.0622019	0.00309776	0.120991	0.34633		605.5	31.2	594.7	18.9	680.1	106.4	597.3	17		3	12.557
24BR1	11		24.7226	42.5584	0.58091		0.793644	0.0550541	0.0943586	0.00314708	0.0616557	0.00310107	0.182671	0.334513		593.2	31.2	581.3	18.5	661.2	107.8	583.8	17.1		2.8	12.0841
24BR1	12		76.2754	99.8071	0.764228		0.820689	0.0532289	0.0976348	0.0030913	0.060953	0.00258652	0.242759	0.32346		608.4	29.7	600.5	18.2	636.6	91.3	602.2	17		1.2	5.67075
24BR1	13		41.028	69.2664	0.592321		0.78847	0.0526595	0.0965438	0.00309723	0.0601172	0.00278346	0.188857	0.296562		590.3	29.9	594.1	18.2	606.8	100.1	593.3	16.7		0.58	2.09295
24BR1	14		72.0822	113.085	0.637418		0.822218	0.0520905	0.101457	0.00307049	0.0591193	0.00246021	0.0309518	0.424519		609.3	29	622.9	18	570.5	90.5	619.2	15.4		-1.6	-9.18493		x
24BR1	15		14.0895	28.7	0.490922		0.829592	0.059993	0.10032	0.00357643	0.0615547	0.00351983	0.0150074	0.442695		613.4	33.3	616.3	21	657.7	122.6	615.5	17.8		1.7	6.29466
24BR1	16		86.362	100.943	0.85555		0.801143	0.0529882	0.0972072	0.00300492	0.0598196	0.00260117	0.280983	0.179235		597.5	29.9	598	17.7	596.1	94.2	597.9	16.8		-0.063	-0.318738
24BR1	17		70.0993	149.389	0.469242		0.803478	0.0500547	0.0976153	0.00299728	0.059841	0.00227454	0.265118	0.309231		598.8	28.2	600.4	17.6	596.9	82.4	600.1	16.5		-0.11	-0.586363
24BR1	18		234.027	408.943	0.572273		0.844556	0.0511443	0.102007	0.0030997	0.0601648	0.00209175	0.33102	0.334986		621.7	28.2	626.2	18.1	608.5	75.2	625.2	17.2		-0.58	-2.90879
24BR1	19		39.2832	45.6081	0.861321		0.795063	0.0578814	0.097261	0.00312234	0.0599593	0.00339639	-0.0183836	0.39061		594	32.7	598.3	18.3	601.1	122.6	597.3	15.9		0.25	0.465813
24BR1	20		66.9024	101.806	0.657156		0.846073	0.0605443	0.101293	0.00346263	0.0605196	0.00323706	0.08312	0.427426		622.5	33.3	622	20.3	621.2	115.4	622.1	17.9		-0.044	-0.128783
24BR1	21		46.0592	53.5667	0.859848		0.808284	0.0563017	0.0972077	0.00305541	0.0604267	0.00298869	0.197176	0.20999		601.5	31.6	598	17.9	617.9	106.8	598.7	16.8		0.68	3.22059
24BR1	22		40.7792	50.695	0.804403		0.824318	0.0561124	0.0982541	0.00321099	0.0614297	0.0029653	0.179808	0.32634		610.5	31.2	604.2	18.8	653.4	103.6	605.6	17.3		1.7	7.52984
24BR1	23		17.0438	28.8151	0.59149		0.825465	0.0641424	0.100867	0.00347801	0.060732	0.00386575	0.0278865	0.406361		611.1	35.7	619.5	20.4	628.8	137.2	617.5	17.9		0.62	1.47901
24BR1	24		94.6045	110.536	0.855875		0.833219	0.0530853	0.100496	0.00315216	0.0605603	0.00251244	0.127638	0.390034		615.4	29.4	617.3	18.5	622.7	89.5	616.8	16.5		0.26	0.867191
24BR1	25		59.8773	98.7442	0.606387		0.802898	0.0521632	0.0969497	0.00299362	0.0608192	0.00269295	0.0848072	0.384269		598.5	29.4	596.5	17.6	631.9	95.4	597	15.6		1.3	5.60215
24BR1	26		16.6771	42.2989	0.394269		0.815476	0.0592384	0.10133	0.00328871	0.058206	0.00305343	0.0853891	0.312743		605.5	33.1	622.2	19.3	536.5	114.8	618.3	17.2		-2.8	-15.9739
24BR1	27		98.3767	135.153	0.727893		0.814647	0.0511349	0.100701	0.00305939	0.0593122	0.0023666	0.191357	0.347333		605.1	28.6	618.5	17.9	577.6	86.7	615.3	16.3		-1.3	-7.08102
24BR1	28		47.0062	88.1498	0.533253		0.835927	0.0551257	0.0975014	0.0029927	0.0621942	0.00275537	0.129018	0.295817		616.9	30.5	599.7	17.6	679.8	94.6	603.4	16.1		2.7	11.7829
24BR1	29		39.8478	48.402	0.823266		0.817253	0.0609298	0.0963272	0.00330911	0.0619387	0.00345169	0.223178	0.237448		606.5	34	592.8	19.5	671	119.2	595.3	18.4		2.7	11.6542
24BR1	30		47.0429	58.662	0.801932		0.886884	0.060658	0.105556	0.00330813	0.0611208	0.00285169	0.234438	0.222641		644.7	32.6	646.9	19.3	642.5	100.3	646.5	18.1		-0.13	-0.684825
24BR1	31		56.0138	94.4227	0.593224		0.87311	0.0552978	0.102259	0.00310605	0.0622451	0.00250289	0.196201	0.314449		637.3	30	627.6	18.2	681.6	85.9	629.7	16.8		1.8	7.92254
24BR1	32		153.499	219.683	0.698732		0.829458	0.0508517	0.0993665	0.00292905	0.0608118	0.00225658	0.138829	0.365779		613.3	28.2	610.7	17.2	631.6	79.9	611.3	15.5		0.73	3.30906
24BR1	33		48.4375	89.988	0.538267		0.821791	0.0525298	0.100182	0.00301379	0.059693	0.00248922	0.125681	0.333602		609	29.3	615.5	17.7	591.5	90.4	613.9	15.9		-0.76	-4.05748		x
24BR1	34		27.1621	47.6239	0.570346		0.772362	0.0555838	0.0972961	0.00323077	0.0579887	0.00315036	0.0950269	0.319103		581.1	31.8	598.5	19	528.4	119	594.3	16.9		-2.2	-13.2665
24BR1	35		38.3502	82.9728	0.462203		0.861727	0.0562143	0.103943	0.00332828	0.0606619	0.00267182	0.174632	0.371677		631.1	30.7	637.5	19.4	626.3	94.9	635.9	17.6		-0.32	-1.78828
24BR1	36		35.9152	42.5178	0.84471		0.805383	0.0559518	0.098738	0.0032909	0.0596645	0.0030646	0.0166176	0.403804		599.9	31.5	607	19.3	590.4	111.4	605.1	16.5		-0.48	-2.81165
24BR1	37		56.8927	80.7732	0.704351		0.814558	0.0551341	0.0985194	0.00302438	0.0606025	0.00286676	0.150285	0.273915		605	30.9	605.7	17.7	624.2	102	605.6	16.3		0.71	2.96379
24BR1	38		166.851	362.127	0.460752		0.816659	0.0492077	0.0979818	0.00284039	0.060381	0.00205508	0.331661	0.251895		606.2	27.5	602.6	16.7	616.3	73.5	603.2	16		0.46	2.22294
24BR1	39		49.1546	96.2536	0.510678		0.906186	0.0570576	0.105236	0.00324706	0.0631447	0.00256167	0.290829	0.320538		655	30.4	645	18.9	712.2	86.2	647	17.9		2.4	9.43555
24BR1	40		39.8805	61.0388	0.653362		0.768481	0.0525864	0.0966982	0.0032305	0.0579817	0.00287875	0.0825741	0.47158		578.9	30.2	595	19	528.1	108.8	590.7	16.6		-2.1	-12.6681
24BR1	41		24.1244	61.4868	0.39235		0.81362	0.0563032	0.101051	0.00322033	0.0589045	0.00302874	0.0785406	0.344206		604.5	31.5	620.6	18.9	562.6	112	616.5	16.7		-1.8	-10.3093
24BR1	42		78.3777	131.505	0.596006		0.822884	0.0513645	0.0984952	0.0030342	0.0606129	0.0023866	0.198251	0.347923		609.7	28.6	605.6	17.8	624.6	84.9	606.5	16.4		0.63	3.04195
24BR1	43		46.497	73.7311	0.630629		0.800561	0.0580904	0.0989762	0.00335596	0.0585068	0.00302487	0.196943	0.186998		597.1	32.8	608.4	19.7	547.8	112.9	605.9	18.1		-2	-11.0624
24BR1	44		112.088	167.449	0.669387		0.828558	0.0513767	0.0984829	0.00306645	0.0611934	0.00232658	0.214471	0.373163		612.8	28.5	605.5	18	645.1	81.7	607.2	16.6		1.3	6.13858		x
24BR1	45		32.289	46.7968	0.689981		0.792973	0.0551261	0.0976269	0.00321511	0.0592132	0.00299279	0.0966034	0.364664		592.9	31.2	600.5	18.9	574	109.9	598.6	16.8		-0.83	-4.61672
24BR1	46		38.2888	63.3008	0.604871		0.859067	0.0589746	0.104349	0.00329279	0.0598114	0.00290796	0.0135661	0.371322		629.6	32.2	639.8	19.2	595.8	105.3	637.2	16.6		-1.4	-7.38503		x
24BR1	47		75.0656	156.485	0.479698		0.818035	0.0497976	0.100215	0.00298565	0.0595369	0.00218242	0.161833	0.388418		607	27.8	615.7	17.5	585.8	79.5	613.5	15.8		-0.93	-5.10413
24BR1	48		63.8789	70.3492	0.908025		0.821727	0.0558014	0.0967742	0.00301878	0.062014	0.00288238	0.356868	0.127719		609	31.1	595.5	17.7	673.6	99.4	597.2	17.4		2.8	11.5944
24BR1	49		46.757	90.1639	0.518578		0.848549	0.0545118	0.0999686	0.00309473	0.0617053	0.0025566	0.147965	0.339961		623.9	29.9	614.2	18.1	662.9	88.8	616.4	16.5		1.6	7.34651
24BR1	50		29.7824	53.4279	0.557431		0.822251	0.0553979	0.101044	0.00317131	0.0596441	0.0028552	0.123947	0.326515		609.3	30.9	620.5	18.6	589.7	103.8	617.8	16.7		-0.93	-5.22299
24BR1	51		85.6846	196.833	0.435317		0.839863	0.0525715	0.0990998	0.00306212	0.0613875	0.00236202	0.218089	0.337791		619.1	29	609.1	18	651.9	82.6	611.3	16.7		1.4	6.56542
24BR1	52		26.2711	51.4922	0.510196		0.814891	0.0570581	0.0979501	0.00319166	0.0611449	0.00326461	-0.017129	0.408273		605.2	31.9	602.4	18.7	643.4	114.8	603.1	16.1		1.5	6.3724		x
24BR1	53		120.967	100.161	1.20773		0.863387	0.053879	0.10342	0.00309524	0.0606337	0.00240372	0.0884372	0.37179		632	29.4	634.4	18.1	625.3	85.5	633.8	16		-0.29	-1.4553		x
24BR1	54		47.0444	94.4636	0.498016		0.788764	0.0521197	0.0958456	0.00298649	0.060117	0.00277256	0.0312326	0.415353		590.5	29.6	590	17.6	606.8	99.8	590.1	15.3		0.62	2.76862		x
24BR1	55		81.5688	123.412	0.660947		0.822021	0.0518374	0.0974671	0.00300017	0.0613349	0.00241576	0.213355	0.338172		609.2	28.9	599.5	17.6	650	84.6	601.6	16.4		1.7	7.76923		x
24BR1	56		63.7388	65.8938	0.967296		0.816253	0.054892	0.0979934	0.0030563	0.0608998	0.00299786	-0.00904149	0.417477		606	30.7	602.6	17.9	634.7	106	603.5	15.4		1.1	5.05751
24BR1	57		15.9597	23.3502	0.683495		0.807014	0.065541	0.0960747	0.00347054	0.0622662	0.00432303	-0.0519376	0.406289		600.8	36.8	591.4	20.4	682.3	148.3	593.7	17.5		3.2	13.3226
24BR1	58		36.0605	42.361	0.851266		0.831246	0.0581139	0.0988107	0.00332783	0.0619211	0.00322144	0.058332	0.407882		614.3	32.2	607.4	19.5	670.4	111.3	609.2	17.1		2.2	9.39737
24BR1	59		31.1144	66.2699	0.469511		0.821273	0.0566094	0.0956224	0.00309562	0.0625523	0.00313094	0.0926192	0.3644		608.8	31.6	588.7	18.2	692.1	106.7	593.2	16.5		3.5	14.94
24BR1	60		113.371	173.42	0.653735		0.828541	0.0522298	0.100625	0.00315438	0.0596457	0.00229825	0.283118	0.287273		612.8	29	618.1	18.5	589.8	83.6	616.9	17.3		-0.95	-4.79824
24BR1	61		37.8862	44.4984	0.851405		0.862241	0.0605628	0.0995517	0.00327836	0.0637769	0.00350272	-0.00741872	0.479483		631.3	33	611.8	19.2	733.3	116.3	616.7	16.6		4.2	16.5689
24BR1	62		76.7145	139.583	0.549596		0.820243	0.0523893	0.100224	0.00304372	0.0593716	0.00248337	0.118754	0.338085		608.2	29.2	615.7	17.8	579.8	90.9	613.9	16		-1.2	-6.19179
24BR1	63		106.546	119.316	0.892977		0.843388	0.0530625	0.100436	0.00309796	0.0613808	0.0025951	0.071285	0.472967		621	29.2	617	18.1	651.6	90.7	618	15.9		1.2	5.31001
24BR1	64		110.412	128.29	0.860642		0.812456	0.0526208	0.100502	0.00311162	0.0590428	0.00254409	0.164875	0.269478		603.8	29.5	617.4	18.2	567.7	93.8	614.1	16.5		-1.6	-8.75462		x
24BR1	65		92.422	120.686	0.765804		0.819226	0.0534978	0.0977682	0.00317166	0.0607488	0.00259297	0.182356	0.414641		607.6	29.9	601.3	18.6	629.4	92	602.8	17		0.92	4.46457
24BR1	66		59.5938	79.874	0.746097		0.810628	0.0539705	0.0976486	0.00299883	0.0601916	0.00277792	0.0750581	0.332535		602.8	30.3	600.6	17.6	609.5	99.8	601.1	15.7		0.29	1.46021		x
24BR1	67		36.7413	86.0271	0.42709		0.83208	0.0565502	0.0988101	0.00319199	0.061393	0.00299616	0.131091	0.342758		614.8	31.3	607.4	18.7	652.1	104.7	609.1	17		1.5	6.85478
24BR1	68		44.6865	92.6542	0.482294		0.803263	0.0536444	0.0982806	0.00311184	0.0593607	0.00278209	0.0664231	0.394202		598.7	30.2	604.3	18.3	579.4	101.8	602.9	16.1		-0.8	-4.29755
24BR1	69		173.283	220.728	0.785052		0.824226	0.0501944	0.0988038	0.00291532	0.0602953	0.00213453	0.376873	0.280311		610.4	27.9	607.4	17.1	613.2	76.5	607.9	16.6		0.18	0.945858
24BR1	70		40.6136	50.5156	0.80398		0.844723	0.0618246	0.100109	0.00332237	0.0607831	0.00337939	-0.0162915	0.451144		621.7	34	615	19.5	630.6	119.7	616.7	16.8		0.46	2.47383
24BR1	71		30.0753	64.6881	0.464928		0.83508	0.0586892	0.0976644	0.00326539	0.0624498	0.00331911	0.115718	0.339983		616.4	32.5	600.7	19.2	688.6	113.4	604.3	17.4		3	12.765
24BR1	72		55.2861	75.9114	0.728297		0.805449	0.0534499	0.0987881	0.00318458	0.0599409	0.00277132	0.208626	0.27683		599.9	30.1	607.3	18.7	600.5	100.1	605.6	17.2		-0.22	-1.13239
24BR1	73		13.8458	29.1395	0.475157		0.826553	0.0669072	0.0993047	0.00361604	0.0608759	0.00398942	0.122657	0.428452		611.7	37.2	610.3	21.2	633.9	141.1	610.6	19.3		0.86	3.72298
24BR1	74		37.1439	77.5547	0.478939		0.823938	0.0537473	0.0966965	0.00301689	0.0619892	0.00277518	0.0937637	0.392191		610.2	29.9	595	17.7	672.8	95.8	598.6	15.9		2.6	11.5636
24BR1	75		54.3969	99.6696	0.545772		0.832427	0.0557392	0.100236	0.00318193	0.0601134	0.00271768	0.145623	0.322347		615	30.9	615.8	18.6	606.7	97.8	615.6	16.9		-0.32	-1.49992
24BR1	76		29.2173	48.5165	0.602213		0.793665	0.0549241	0.0973568	0.00319568	0.059824	0.00300093	0.182171	0.329752		593.2	31.1	598.9	18.8	596.2	108.7	597.6	17.2		-0.16	-0.452868		x
24BR1	77		30.675	55.7847	0.549881		0.825979	0.0586278	0.0972307	0.00316551	0.06155	0.00315727	0.0985368	0.333982		611.4	32.6	598.2	18.6	657.5	110	601.1	16.9		2	9.01901		x
24BR1	78		28.3201	34.7133	0.815828		0.823889	0.0630719	0.096528	0.00329385	0.0619087	0.00368948	0.150965	0.181095		610.2	35.1	594	19.4	670	127.5	597.1	18		2.6	11.3433
24BR1	79		23.2974	36.2632	0.642454		0.820559	0.0602156	0.0990072	0.0032455	0.0601436	0.00325988	0.0746175	0.272459		608.4	33.6	608.6	19	607.8	117.2	608.5	17.1		-0.025	-0.131622		x
24BR1	80		100.223	191.835	0.522442		0.814619	0.0522373	0.0960742	0.00297091	0.0615846	0.00260332	0.117806	0.375519		605	29.2	591.4	17.5	658.8	90.6	594.5	15.8		2.2	10.2307
24BR1	81		30.3137	41.5617	0.729366		0.809728	0.0579162	0.0981615	0.00320385	0.0611436	0.00334156	0.188441	0.253346		602.3	32.5	603.6	18.8	643.3	117.5	603.4	17.5		1.5	6.1713
24BR1	82		65.6285	121.033	0.542235		0.798836	0.0514297	0.0980429	0.00297812	0.0591646	0.00250694	0.159746	0.310308		596.2	29	602.9	17.5	572.2	92.2	601.4	15.9		-1	-5.36526
24BR1	83		56.8035	107.567	0.528075		0.812698	0.0523852	0.0975986	0.00297526	0.0603155	0.00255482	0.161935	0.273417		604	29.3	600.3	17.5	613.9	91.5	601.1	16		0.44	2.21534		x
24BR1	84		34.4077	58.8262	0.584905		0.792549	0.0555148	0.0965512	0.0030336	0.0594615	0.00305057	0.0452321	0.317968		592.6	31.4	594.2	17.8	583.1	111.4	593.8	15.8		-0.38	-1.90362
24BR1	85		37.3884	121.503	0.307715		0.833949	0.0558175	0.0990122	0.00314949	0.0610917	0.00282137	0.103664	0.320271		615.8	30.9	608.6	18.5	641.5	99.3	610.3	16.6		1.1	5.1286
24BR1	86		36.6958	67.3368	0.544959		0.785686	0.0545074	0.0968343	0.00312354	0.0597374	0.00307909	0.12444	0.335188		588.7	31	595.8	18.4	593.1	111.7	594.2	16.6		-0.22	-0.455235
24BR1	87		22.0902	39.5927	0.557935		0.826444	0.0611858	0.0972519	0.00331087	0.0626348	0.0035496	0.136932	0.279697		611.6	34	598.3	19.5	694.9	120.8	601.1	17.9		3.4	13.9013
24BR1	88		40.4064	60.0473	0.672909		0.829711	0.0586452	0.09709	0.00308906	0.0617938	0.00318481	0.0595234	0.350361		613.5	32.5	597.3	18.2	666	110.4	600.9	16.3		2.3	10.3153
24BR1	89		111.675	523.41	0.21336		0.8224	0.0490258	0.0980112	0.00287675	0.0608673	0.00209748	0.148186	0.475387		609.4	27.3	602.7	16.9	633.6	74.2	604.3	15.3		1	4.87689
24BR1	90		32.0098	55.1883	0.580011		0.82571	0.0584982	0.0970763	0.00309188	0.0615379	0.00319226	0.0650041	0.369234		611.2	32.5	597.3	18.2	657.1	111.2	600.3	16.3		2	9.10059		x
24BR1	91		96.8398	116.069	0.834328		0.827023	0.0518763	0.0976661	0.00303775	0.0616744	0.00245029	0.172378	0.365113		612	28.8	600.7	17.8	661.9	85.1	603.3	16.3		2.1	9.24611
24BR1	92		72.61	85.6213	0.848036		0.806655	0.0533638	0.0950005	0.00290428	0.061806	0.0028599	0.0535045	0.369626		600.6	30	585	17.1	666.4	99.1	588.6	15.2		2.7	12.2149
24BR1	93		94.7335	105.937	0.894242		0.823284	0.052667	0.0975641	0.00296637	0.0612228	0.00260223	0.0894926	0.392681		609.9	29.3	600.1	17.4	646.1	91.3	602.4	15.6		1.5	7.11964
24BR1	94		54.7708	46.8177	1.16987		0.779526	0.0554391	0.0954487	0.00299975	0.0592395	0.00314314	0.0402153	0.343275		585.2	31.6	587.7	17.7	574.9	115.4	587.1	15.7		-0.42	-2.22647		x
24BR1	95		60.3923	73.9879	0.816246		0.822082	0.0534875	0.0999844	0.00313994	0.0600556	0.00268279	0.0227238	0.431287		609.2	29.8	614.3	18.4	604.6	96.7	612.9	15.8		-0.27	-1.60437		x
24BR1	96		86.0834	99.5231	0.864959		0.862938	0.0554405	0.100861	0.00307147	0.0618918	0.00260345	0.0990402	0.365572		631.7	30.2	619.5	18	669.4	90	622.3	16.1		1.6	7.45444		x
24BR1	97		85.7507	138.109	0.62089		0.819136	0.0518962	0.0977881	0.00289832	0.0607411	0.00246821	0.0592669	0.357728		607.6	29	601.4	17	629.1	87.5	602.9	15.1		0.9	4.40312
24BR1	98		3.23324	13.5679	0.238301		0.858859	0.091865	0.100517	0.00457631	0.0638238	0.00647432	0.0297564	0.429171		629.5	50.2	617.4	26.8	734.9	214.8	620	24		4.2	15.9886
24BR1	99		34.7675	65.9089	0.527508		0.816209	0.056131	0.0983614	0.00321045	0.0602675	0.00297166	0.0861589	0.375665		605.9	31.4	604.8	18.8	612.2	106.6	605.1	16.7		0.25	1.20876
24BR1	100		122.855	162.703	0.755088		0.833537	0.0510175	0.100296	0.00298201	0.0602778	0.00226209	0.101405	0.425311		615.6	28.3	616.1	17.5	612.6	81.1	616	15.5		-0.12	-0.571335		x
24BR1	101		286.377	351.302	0.815187		0.851418	0.0519598	0.100124	0.0029575	0.0614417	0.00217741	0.305999	0.288614		625.4	28.5	615.1	17.3	653.8	76	617	16.6		1.3	5.91924
24BR1	102		66.9576	66.177	1.0118		0.810763	0.0567485	0.0969783	0.00310895	0.0606424	0.00309932	0.179175	0.295152		602.9	31.8	596.7	18.3	625.6	110.2	597.9	17		0.97	4.61957
24BR1	103		54.2991	92.8864	0.584576		0.824971	0.0544497	0.0993619	0.00311132	0.0606077	0.00268566	0.249277	0.21681		610.8	30.3	610.7	18.2	624.4	95.6	610.7	17.1		0.52	2.19411
24BR1	104		18.8536	29.3631	0.642086		0.7965	0.0647265	0.0960915	0.0035578	0.0615014	0.00436955	-0.0353355	0.473628		594.9	36.6	591.5	20.9	655.8	152.4	592.3	17.9		2.3	9.80482
24BR1	105		16.497	29.7397	0.554713		0.861095	0.0645434	0.0984076	0.00346411	0.0638991	0.00382377	0.0670228	0.416007		630.7	35.2	605.1	20.3	737.3	126.7	610.9	18.2		4.5	17.9303
24BR1	106		53.2678	69.2044	0.769717		0.847302	0.0570738	0.101728	0.00331713	0.0609726	0.00288982	0.189119	0.301524		623.2	31.4	624.5	19.4	637.3	102	624.2	17.8		0.52	2.00847
24BR1	107		291.436	256.245	1.13733		0.814332	0.049514	0.0975779	0.00290201	0.0604181	0.00216369	0.254479	0.379673		604.9	27.7	600.2	17	617.6	77.3	601.2	16		0.56	2.81736
24BR1	108		43.9742	60.1208	0.731432		0.79441	0.0563501	0.0968654	0.00307911	0.05994	0.00311957	0.116441	0.239251		593.7	31.9	596	18.1	600.4	112.7	595.5	16.5		0.23	0.732845
24BR1	109		66.5189	86.0906	0.772662		0.835829	0.0612357	0.0968665	0.00319408	0.0624154	0.00337085	0.129111	0.171949		616.8	33.9	596	18.8	687.4	115.3	600.1	17.3		3.1	13.2965
24BR1	110		40.968	70.4969	0.581132		0.792876	0.0552709	0.098355	0.00319667	0.0588613	0.00293661	0.113494	0.32385		592.8	31.3	604.8	18.8	561	108.7	601.9	16.8		-1.4	-7.80749		x
24BR1	111		38.0476	70.567	0.53917		0.782963	0.0544153	0.0956693	0.0031191	0.0594411	0.002928	0.189984	0.313969		587.2	31	589	18.4	582.3	107	588.6	17		-0.21	-1.15061
24BR1	112		131.44	132.401	0.992744		0.818367	0.0521606	0.0974664	0.00296233	0.0613285	0.002598	0.0924426	0.373932		607.1	29.1	599.5	17.4	649.8	91	601.4	15.5		1.7	7.74084		x
24BR1	113		203.96	221.253	0.92184		0.80526	0.0504931	0.0969611	0.00295967	0.0600649	0.00236498	0.152125	0.358748		599.8	28.4	596.6	17.4	604.9	85.2	597.3	15.8		0.25	1.37213
24BR1	114		38.0503	49.1173	0.774682		0.791287	0.056169	0.0981819	0.00332593	0.0593921	0.0031625	0.106677	0.369081		591.9	31.8	603.7	19.5	580.5	115.6	600.8	17.3		-0.66	-3.99655
24BR1	115		54.9096	78.6025	0.698573		0.781474	0.0555409	0.0943054	0.00338985	0.0599192	0.00317126	0.116881	0.415457		586.3	31.7	580.9	20	599.7	114.6	582.3	17.8		0.58	3.1349
24BR1	116		44.7009	218.352	0.204719		0.785368	0.0517372	0.0957324	0.00295113	0.0590048	0.00245914	0.217955	0.354047		588.5	29.4	589.3	17.4	566.3	90.7	589.2	16.2		-0.85	-4.06145
24BR1	117		33.9134	61.4686	0.551719		0.80091	0.0565825	0.100343	0.00326346	0.0582575	0.00304386	0.135527	0.30435		597.3	31.9	616.4	19.1	538.5	114.3	611.9	17.2		-2.5	-14.4661
24BR1	118		261.773	311.089	0.841472		0.80443	0.0516154	0.0980456	0.00302545	0.0595666	0.00240346	0.289458	0.238689		599.3	29	602.9	17.8	586.9	87.5	602.2	16.8		-0.53	-2.72619
24BR1	119		397.929	611.127	0.65114		0.838979	0.052936	0.100021	0.00325769	0.0605111	0.00234918	0.257929	0.429711		618.6	29.2	614.5	19.1	620.9	83.8	615.5	17.7		0.18	1.03076
24BR1	120		76.8946	96.4313	0.797403		0.804927	0.0525738	0.0975234	0.00298003	0.06032	0.00272339	0.130644	0.341848		599.6	29.6	599.9	17.5	614.1	97.5	599.8	15.9		0.54	2.31233
24BR1	121		51.6274	196.219	0.263111		0.811748	0.0527107	0.0984624	0.0032366	0.0597622	0.00254667	0.184854	0.351666		603.4	29.5	605.4	19	594	92.4	604.9	17.2		-0.38	-1.91919
24BR1	122		10.3994	24.2622	0.428626		0.81119	0.0660266	0.0980977	0.00349023	0.0616369	0.00413187	0.138566	0.24352		603.1	37	603.3	20.5	660.6	143.7	603.2	18.9		2.2	8.67393
24BR1	123		71.1387	106.174	0.670022		0.850208	0.0595607	0.0998435	0.00324277	0.0616123	0.00282037	0.247459	0.197758		624.8	32.7	613.5	19	659.7	98.1	615.5	18		1.6	7.00318		x
24BR1	124		98.5075	112.326	0.876975		0.805034	0.0520802	0.0977805	0.00301383	0.0594232	0.00234522	0.39488	0.100144		599.7	29.3	601.4	17.7	581.7	85.7	601.1	17.2		-0.72	-3.38663		x
24BR1	125		46.388	77.4641	0.598833		0.80798	0.0535394	0.0991647	0.00310743	0.0589686	0.0026833	0.104617	0.359933		601.3	30.1	609.5	18.2	565	99.1	607.5	16.2		-1.5	-7.87611
24BR1	126		21.2975	34.5101	0.617139		0.820057	0.0626669	0.100089	0.00346285	0.0603845	0.00371862	0.0078575	0.38593		608.1	35	614.9	20.3	616.4	133	613.2	17.6		0.32	0.243348
24BR1	127		117.384	154.133	0.761577		0.783949	0.0500236	0.0965747	0.00302863	0.0587816	0.00230004	0.443452	0.212278		587.7	28.5	594.3	17.8	558.1	85.3	593.4	17.4		-1.3	-6.48629
24BR1	128		74.2952	100.644	0.738197		0.812547	0.0541026	0.100444	0.00311451	0.0592287	0.00272434	0.130609	0.326302		603.9	30.3	617	18.2	574.5	100	613.9	16.4		-1.3	-7.39774		x
24BR1	129		23.4188	52.2981	0.447795		0.813936	0.059028	0.101245	0.0034427	0.0587809	0.00315957	0.0494427	0.278775		604.7	33	621.7	20.2	558	117.2	617.2	17.5		-2	-11.4158
24BR1	130		45.7577	45.3907	1.00809		0.782352	0.0611911	0.0985154	0.00324441	0.0578554	0.00349396	0.103299	0.156631		586.8	34.9	605.7	19	523.3	132.5	601.8	17.3		-2.7	-15.7462
24BR1	131		77.4346	91.7819	0.843681		0.823813	0.0547402	0.101127	0.00305603	0.0591382	0.00267064	0.118568	0.291167		610.2	30.5	621	17.9	571.2	98.3	618.5	16.1		-1.6	-8.71849		x
24BR1	132		42.7889	46.9123	0.912104		0.804661	0.0652574	0.0964196	0.00344118	0.0610853	0.0040264	0.0788816	0.213687		599.5	36.7	593.4	20.2	641.3	141.7	594.7	18.3		1.7	7.4692
24BR1	133		111.513	123.438	0.903394		0.812224	0.0525606	0.097697	0.00308839	0.0603533	0.00263563	0.071069	0.448811		603.7	29.4	600.9	18.1	615.3	94.3	601.6	15.9		0.47	2.34032		x
24BR1	134		53.6061	49.6201	1.08033		0.811112	0.0578561	0.0992968	0.0032123	0.0596151	0.00311707	0.170312	0.079323		603.1	32.4	610.3	18.8	588.7	113.4	608.8	17.4		-0.68	-3.6691
24BR1	135		24.9885	36.9374	0.67651		0.802173	0.0633037	0.0982494	0.00341549	0.0604021	0.0039278	0.0369045	0.399515		598.1	35.7	604.1	20	617	140.4	602.7	17.7		0.66	2.09076
24BR1	136		39.4449	111.997	0.352195		0.820637	0.0536865	0.101634	0.00324864	0.0586329	0.00252261	0.172956	0.367467		608.4	29.9	624	19	552.5	93.9	620	17.1		-2.3	-12.9412
24BR1	137		36.9058	69.6142	0.530147		0.962917	0.0668959	0.115109	0.00393098	0.0606186	0.00301986	0.198951	0.401449		684.8	34.6	702.4	22.7	624.8	107.4	697.7	20.5		-2.5	-12.42
24BR1	138		135.476	432.774	0.31304		0.796738	0.049982	0.0984128	0.00322711	0.0582178	0.0022007	0.48764	0.191867		595	28.2	605.1	18.9	537	82.7	603.5	18.5		-2.4	-12.6816
24BR1	139		311.236	434.33	0.716589		0.794628	0.0482353	0.0980562	0.00290446	0.058862	0.00206874	0.301518	0.262105		593.8	27.3	603	17	561	76.6	601.1	16.1		-1.4	-7.48663		x
24BR1	140		20.6774	33.0354	0.625918		0.851675	0.0665934	0.100697	0.00363508	0.0619819	0.00390497	0.145017	0.350214		625.6	36.5	618.5	21.3	672.5	134.8	620	19.5		1.9	8.02974
24BR1	141		79.9717	78.9979	1.01233		0.800828	0.0588001	0.0987847	0.00332523	0.0592192	0.00349548	-0.104727	0.526792		597.3	33.2	607.3	19.5	574.2	128.3	604.5	16		-1	-5.76454
24BR1	142		25.5957	46.2254	0.553714		0.786164	0.05517	0.095464	0.00333334	0.0604222	0.00317339	0.0799096	0.399658		589	31.4	587.8	19.6	617.7	113.4	588.1	17.2		1.1	4.84054
24BR1	143		61.594	80.1951	0.768053		0.84621	0.0606186	0.0996432	0.00325665	0.0612961	0.00309276	0.272317	0.223958		622.6	33.3	612.3	19.1	648.7	108.4	614	18.3		1.2	5.61122
24BR1	144		99.502	98.4354	1.01084		0.804232	0.0573103	0.095013	0.00308593	0.0609381	0.00309877	0.108058	0.358206		599.2	32.3	585.1	18.2	636.1	109.4	588.1	16.6		1.6	8.01761
24BR1	145		49.5672	61.2767	0.808907		0.847487	0.0596108	0.099496	0.00330866	0.0622474	0.00322501	0.191931	0.319893		623.3	32.8	611.5	19.4	681.6	110.7	613.9	18		2.4	10.2846
24BR1	146		83.7426	179.159	0.467421		0.844183	0.0532153	0.100851	0.0030942	0.0607973	0.00238822	0.257836	0.297432		621.5	29.3	619.4	18.1	631.1	84.6	619.8	17		0.4	1.85391
24BR1	147		126.45	291.535	0.433739		0.845895	0.0513611	0.101984	0.00293958	0.0601029	0.00205729	0.395004	0.141949		622.4	28.3	626	17.2	606.3	74	625.5	16.7		-0.69	-3.24922		x
24BR1	148		112.622	116.871	0.96364		0.8256	0.0537227	0.0994309	0.00308747	0.0603686	0.00256977	0.235204	0.315744		611.2	29.9	611.1	18.1	615.9	91.9	611.1	16.9		0.18	0.779347		x
24BR1	149		31.8902	43.0078	0.741499		0.823179	0.0614072	0.0984108	0.00337556	0.0608734	0.003425	0.20164	0.290793		609.8	34.2	605.1	19.8	633.8	121.1	606	18.5		0.99	4.52824
24BR1	150		45.4929	47.0354	0.967205		0.834895	0.0630372	0.09682	0.00329723	0.0623086	0.00349559	0.177009	0.285976		616.3	34.9	595.7	19.4	683.8	119.8	599.5	18.2		3	12.8839
24BR1	151		79.7806	110.333	0.723092		0.748404	0.0506422	0.090298	0.00296877	0.0605581	0.00284323	0.21048	0.287271		567.3	29.4	557.3	17.6	622.6	101.3	559.4	16.4		2.2	10.4883
24BR1	152		55.9031	51.7519	1.08021		0.819295	0.055677	0.0980567	0.00320415	0.0609133	0.00298393	0.0922631	0.393453		607.7	31.1	603	18.8	635.2	105.4	604.2	16.7		1.1	5.06927
24BR1	153		175.101	442.417	0.395782		0.816819	0.0486275	0.0996866	0.00294157	0.0588543	0.00187837	0.380118	0.32649		606.3	27.2	612.6	17.2	560.7	69.5	611.5	16.6		-1.8	-9.25629		x
24BR1	154		52.2271	64.4238	0.81068		0.836912	0.0564101	0.0994492	0.00324481	0.0605242	0.0027962	0.155107	0.32112		617.4	31.2	611.2	19	621.4	99.7	612.6	17.3		0.29	1.64145
24BR1	155		59.4942	204.632	0.290737		0.832963	0.0524366	0.101098	0.00308588	0.0588834	0.00230812	0.138417	0.400338		615.3	29	620.8	18.1	561.8	85.4	619.4	16.2		-2.1	-10.502
24BR1	156		135.619	182.044	0.74498		0.842951	0.0519845	0.0984402	0.0028796	0.0623605	0.00240591	0.118806	0.377411		620.8	28.6	605.3	16.9	685.5	82.4	608.8	15.3		2.7	11.6995
24BR1	157		19.4572	45.244	0.43005		0.842907	0.0630531	0.0995581	0.00347763	0.0610639	0.00331791	0.290932	0.204707		620.7	34.7	611.8	20.4	640.5	116.9	613.3	19.5		0.94	4.48087
24BR1	158		36.514	56.0759	0.651153		0.80688	0.0565227	0.100596	0.003321	0.0587899	0.0030882	0.131897	0.271701		600.7	31.8	617.9	19.5	558.3	114.5	613.7	17.4		-1.9	-10.6753
24BR1	159		185.858	177.871	1.04491		0.844924	0.0523443	0.101076	0.00311022	0.0605624	0.00235907	0.126816	0.452996		621.9	28.8	620.7	18.2	622.7	84	621	16.2		0.057	0.321182		x
24BR1	160		67.0068	145.263	0.461278		1.48803	0.0921944	0.154938	0.00463685	0.0691751	0.00252806	0.316291	0.234759		925.5	37.6	928.6	25.9	903	75.3	927.8	24.1		-0.95	-2.83499		x
24BR1	161		58.4751	80.1389	0.729672		0.832993	0.0552081	0.10019	0.00326909	0.0603372	0.00276779	0.0803677	0.418236		615.3	30.6	615.5	19.2	614.7	99.1	615.5	16.8		-0.025	-0.130145
24BR1	162		93.6936	148.649	0.630301		0.878464	0.0562016	0.104063	0.00312871	0.0611403	0.00250094	0.22882	0.267089		640.2	30.4	638.2	18.3	643.2	87.9	638.6	17.1		0.16	0.777363		x
24BR2	1		75.9756	135.199	0.561953		0.840757	0.0589219	0.0978062	0.00321235	0.0615208	0.00309169	0.134279	0.318896		619.6	32.5	601.5	18.9	656.5	107.8	605.4	17.3		1.7	8.37776
24BR2	2		79.9087	161.974	0.493343		0.877051	0.0576278	0.102577	0.00322153	0.0621115	0.00269042	0.310529	0.285316		639.4	31.2	629.5	18.8	677	92.6	631.2	18		1.6	7.01625
24BR2	3		97.6141	174.331	0.559935		0.847903	0.0518391	0.101385	0.00294678	0.0604095	0.00218006	0.215361	0.190344		623.5	28.5	622.5	17.2	617.3	77.9	622.7	16		-0.22	-0.842378
24BR2	4		42.9937	127.721	0.336622		0.86386	0.0562894	0.101845	0.0031642	0.060715	0.00246603	0.372583	0.159154		632.2	30.7	625.2	18.5	628.2	87.5	626.3	18		0.12	0.477555
24BR2	5		42.2063	91.909	0.459219		0.747664	0.0484613	0.092288	0.00282035	0.0590682	0.00255961	0.193489	0.279898		566.9	28.2	569.1	16.6	568.6	94.3	568.6	15.4		-0.07	-0.0879353
24BR2	6		35.7898	73.6306	0.486073		0.843914	0.0750929	0.0992412	0.00374517	0.0615205	0.00467348	0.117281	0.217034		621.3	41.4	610	22	656.5	162.9	612.1	20.3		1.6	7.08302
24BR2	7		51.8471	128.72	0.40279		0.897274	0.0579857	0.107355	0.00351633	0.0601896	0.00241548	0.394834	0.265624		650.3	31	657.4	20.5	609.4	86.7	656	19.6		-1.7	-7.8766
24BR2	8		15.3187	32.9712	0.464607		0.857797	0.0678937	0.09827	0.00364594	0.064476	0.00415737	0.162462	0.327937		628.9	37.1	604.3	21.4	756.3	136	609.2	19.8		5.3	20.0978
24BR2	9		53.8322	138.058	0.389924		0.738883	0.0478796	0.0918911	0.00284581	0.0579503	0.00236584	0.321012	0.234877		561.8	28	566.7	16.8	526.9	89.5	565.8	16.1		-1.4	-7.55362
24BR2	10		10.0469	31.5048	0.3189		0.874437	0.0745328	0.102861	0.00390282	0.0619084	0.00454012	0.0744029	0.275277		638	40.4	631.2	22.8	670	156.9	632.7	20.5		1.3	5.79104
24BR2	11		45.542	66.3753	0.686128		0.922355	0.066242	0.107608	0.00361193	0.0625978	0.00341645	0.155808	0.306112		663.6	35	658.8	21	693.6	116.3	659.9	19.2		1.2	5.0173
24BR2	12		254.923	404.814	0.62973		0.829136	0.0506404	0.0982147	0.00291678	0.060796	0.00220304	0.191876	0.380221		613.1	28.1	603.9	17.1	631.1	78	606	15.8		0.84	4.30994
24BR2	13		72.5271	112.346	0.645568		0.826518	0.0533895	0.097856	0.00295958	0.0610551	0.0025717	0.217871	0.24748		611.7	29.7	601.8	17.4	640.2	90.6	603.8	16.3		1.3	5.99813
24BR2	14		158.253	275.155	0.575139		0.905182	0.0554546	0.106716	0.00318182	0.0605516	0.00206504	0.465538	0.143732		654.5	29.6	653.6	18.5	622.4	73.6	653.8	18.2		-1.2	-5.01285
24BR2	15		30.0157	46.296	0.648343		0.823009	0.0582184	0.097255	0.00324574	0.0619396	0.00334782	0.0785956	0.21948		609.7	32.4	598.3	19.1	671.1	115.7	601	17		2.5	10.8479
24BR2	16		48.7792	136.488	0.35739		0.830009	0.0521287	0.0991342	0.00294872	0.0602048	0.00235019	0.138279	0.356871		613.6	28.9	609.3	17.3	610	84.4	610.3	15.7		0.14	0.114754
24BR2	17		134.06	232.052	0.577715		0.764119	0.0487422	0.0922578	0.00287864	0.0600928	0.0024589	0.260971	0.30141		576.4	28.1	568.9	17	606	88.5	570.4	16		1.2	6.12211
24BR2	18		55.2883	183.949	0.300564		0.82532	0.0523082	0.0979026	0.0029439	0.0606559	0.00234495	0.331046	0.19461		611	29.1	602.1	17.3	626.1	83.3	603.5	16.7		0.77	3.83325
24BR2	19		67.3632	127.693	0.52754		0.86816	0.0558882	0.101842	0.00322765	0.0615453	0.00252513	0.276269	0.30817		634.6	30.4	625.2	18.9	657.4	88	627.1	17.8		1	4.89808
24BR2	20		85.4526	154.92	0.551593		0.866671	0.0551407	0.101623	0.00314318	0.0615531	0.00246372	0.273764	0.306878		633.8	30	623.9	18.4	657.7	85.8	625.9	17.4		1.1	5.13912
24BR2	21		103.043	149.161	0.690818		0.869797	0.0553534	0.101521	0.00323744	0.061962	0.00261339	0.162453	0.437848		635.5	30.1	623.3	18.9	671.8	90.2	626.3	17.2		1.6	7.21941
24BR2	22		94.1857	174.228	0.540588		0.737065	0.0482726	0.0899092	0.00278142	0.0589966	0.00250631	0.190619	0.285294		560.7	28.2	555	16.4	566	92.5	556.2	15.3		0.32	1.94346
24BR2	23		140.744	133.867	1.05137		0.840103	0.0534787	0.0983812	0.00302302	0.0616614	0.00249088	0.308945	0.24816		619.2	29.5	604.9	17.7	661.4	86.6	607.4	17		1.9	8.54249
24BR2	24		39.6179	56.4603	0.701695		0.869797	0.0583753	0.101828	0.00325872	0.0621512	0.00292606	0.141405	0.331694		635.5	31.7	625.1	19.1	678.3	100.6	627.5	17.3		1.8	7.84314
24BR2	25		71.4962	98.0022	0.729537		0.814991	0.0528703	0.0996429	0.00306385	0.0589251	0.00254606	0.213973	0.265516		605.3	29.6	612.3	18	563.3	94.1	610.8	16.6		-1.7	-8.69874
24BR2	26		52.8927	100.733	0.525076		0.899595	0.0576183	0.106425	0.00321403	0.0616637	0.00262709	0.127681	0.36129		651.5	30.8	652	18.7	661.5	91.3	651.8	16.9		0.38	1.43613
24BR2	27		41.9169	131.991	0.317573		0.873893	0.0555105	0.103257	0.00310422	0.0610054	0.00242904	0.218768	0.276468		637.7	30.1	633.5	18.1	638.4	85.7	634.3	16.9		0.14	0.767544
24BR2	28		27.7566	82.6415	0.335868		0.869669	0.0561011	0.102942	0.0032504	0.0611051	0.00259503	0.124929	0.389929		635.4	30.5	631.6	19	642	91.3	632.6	17		0.31	1.61994
24BR2	30		80.0992	237.361	0.337458		0.857769	0.0523157	0.102211	0.00304995	0.0604365	0.00210932	0.338507	0.244956		628.9	28.6	627.4	17.8	618.3	75.3	627.6	17.1		-0.38	-1.47178
24BR2	31		79.6186	168.4	0.472794		0.928586	0.0572	0.106576	0.0032767	0.0630485	0.00237115	0.209324	0.402991		666.9	30.1	652.8	19.1	708.9	80	656.1	17.6		1.8	7.91367
24BR2	32		306.171	391.157	0.782731		0.851784	0.0515444	0.101831	0.00307129	0.0602824	0.00198228	0.55764	0.135588		625.6	28.3	625.1	18	612.7	71	625.2	17.9		-0.47	-2.02383
24BR2	33		50.2171	176.409	0.284664		0.825546	0.0504635	0.0988524	0.00296478	0.0604687	0.00220255	0.180963	0.395114		611.1	28.1	607.7	17.4	619.4	78.6	608.5	15.9		0.37	1.88892
24BR2	34		250.037	313.236	0.798237		0.764847	0.0469759	0.091455	0.00287704	0.0607451	0.00227844	0.262017	0.438979		576.8	27	564.1	17	629.2	80.8	566.8	15.9		2.2	10.3465
24BR2	35		41.7321	76.5543	0.545132		0.877064	0.0589618	0.102389	0.00332771	0.0619429	0.00282173	0.219942	0.296407		639.4	31.9	628.4	19.5	671.2	97.5	630.7	18.1		1.4	6.37664
24VG1	1		167.24	152.977	1.09324		3.93111	0.295531	0.284276	0.00828	0.099432	0.002191	0.482807	0.252768		1620.1	60.9	1612.9	41.6	1612.6	41	1614.1	40.6		-0.113	-0.0186035
24VG1	2		120.49	278.777	0.43221		0.561504	0.043956	0.07085	0.002089	0.057217	0.001887	0.173174	0.403343		452.5	28.6	441.3	12.6	498.9	72.6	442.5	12.2		1.97	11.5454
24VG1	3		437.022	1123.2	0.389087		1.22694	0.093975	0.12562	0.003991	0.069707	0.001695	0.586939	0.315681		812.9	42.8	762.8	22.9	918.8	50	759.7	22.9		6.43	16.9787
24VG1	4		304.16	931.194	0.326635		1.65677	0.128259	0.149277	0.005175	0.078596	0.002187	0.483756	0.356031		992.1	49	896.9	29	1161.1	55.2	900.9	29.4		10.3	22.7543
24VG1	5		71.5245	100.461	0.711963		4.09874	0.304845	0.29243	0.008155	0.100907	0.00215	0.319189	0.404541		1654.1	60.7	1653.7	40.7	1640	39.6	1653.8	38.2		-0.607	-0.835366
24VG1	6		167.63	262.072	0.639634		4.17755	0.318888	0.29297	0.011052	0.101665	0.002801	0.570502	0.546442		1669.6	62.5	1656.4	55.1	1653.9	51.1	1660.9	51.9		-0.491	-0.151158
24VG1	7		241.76	628.7	0.38454		3.86434	0.285423	0.281462	0.00751	0.099429	0.001867	0.471141	0.389028		1606.3	59.6	1598.7	37.8	1612.6	35	1599.7	37.2		0.541	0.861962
24VG1	8		159.851	478.978	0.333734		4.6316	0.344505	0.295265	0.00866	0.112392	0.002174	0.626189	0.488166		1755	62.1	1667.8	43.1	1837.6	35	1668.8	44.2		7.5	9.24031
24VG1	9		232.768	219.332	1.06126		3.95182	0.293114	0.285762	0.008062	0.099954	0.001981	0.477517	0.431576		1624.4	60.1	1620.3	40.4	1622.4	36.9	1621	39.5		0.0545	0.129438
24VG1	10		57.2353	131.854	0.434082		3.48032	0.266814	0.268652	0.008285	0.093896	0.002557	0.467494	0.263114		1522.8	60.5	1534	42.1	1505.2	51.5	1531.8	40.6		-1.09	-1.91337
24VG1	11		366.729	532.418	0.6888		1.82026	0.140663	0.177066	0.005542	0.073406	0.002003	0.442067	0.23322		1052.8	50.6	1050.9	30.4	1024.3	55.2	1051.1	29.9		-1.1	-2.5969
24VG1	12		24.2505	870.075	0.0278718		2.76385	0.203573	0.234824	0.006312	0.085035	0.001494	0.531374	0.35959		1345.8	54.9	1359.7	33	1315.5	34.1	1358.8	32.7		-1.8	-3.35994		x
24VG1	13		379.333	571.865	0.663326		1.19931	0.09509	0.086628	0.00247	0.100505	0.003555	0.178693	0.202272		800.3	43.9	535.6	14.7	1632.6	65.7	541.9	14.7		43.9	67.1934
24VG1	14		235.019	196	1.19908		1.03998	0.080148	0.117378	0.003437	0.064098	0.001998	0.187634	0.414675		723.9	39.9	715.5	19.8	743.9	65.9	716.7	18.9		0.985	3.81772
24VG1	15		168.518	229.674	0.73373		3.7827	0.277518	0.279317	0.00734	0.097291	0.00167	0.433435	0.438806		1589.1	58.9	1587.9	37	1572	32.1	1588.1	36.2		-0.708	-1.01145		x
24VG1	16		139.091	355.299	0.391475		1.76513	0.130351	0.174393	0.004673	0.072997	0.001344	0.487827	0.323567		1032.7	47.9	1036.3	25.7	1013	37.3	1036.1	25.6		-0.931	-2.3001		x
24VG1	17		175.547	262.686	0.668278		0.767596	0.057238	0.094898	0.002512	0.057559	0.001217	0.391137	0.262862		578.4	32.9	584.4	14.8	512	46.5	584.2	14.7		-2.69	-14.1406
24VG1	18		113.142	117.989	0.958924		6.09977	0.457588	0.365017	0.010324	0.119117	0.002866	0.331785	0.343911		1990.2	65.4	2005.9	48.8	1942.2	43	2001.3	44.4		-2.6	-3.27979
24VG1	19		82.5163	642.994	0.128331		3.1982	0.241397	0.251469	0.00768	0.089437	0.001763	0.692323	0.378607		1456.7	58.4	1446	39.6	1412.7	37.7	1445.7	39.7		-1.4	-2.35719
24VG1	20		437.625	621.811	0.703791		0.585373	0.043366	0.075576	0.002065	0.055768	0.00106	0.511686	0.334366		467.9	27.8	469.7	12.4	442.1	42.3	469.7	12.3		-1.02	-6.24293		x
24VG1	21		40.0689	299.535	0.13377		2.95071	0.218902	0.239249	0.006561	0.087174	0.001733	0.377737	0.382805		1395	56.3	1382.8	34.1	1363.5	38.3	1384.6	33.2		-0.962	-1.41547
24VG1	22		202.847	272.885	0.743343		3.85615	0.303151	0.26657	0.009477	0.104185	0.002949	0.608642	0.035249		1604.6	63.4	1523.4	48.2	1699.1	52.1	1532.6	49.1		7.04	10.3408
24VG1	23		163.961	402.93	0.406922		4.47188	0.33112	0.306536	0.00828	0.105172	0.001967	0.56093	0.328892		1725.8	61.4	1723.6	40.9	1716.5	34.4	1723.8	40.6		-0.332	-0.413632
24VG1	24		95.7509	469.523	0.203932		0.888084	0.067124	0.073506	0.002098	0.085748	0.002248	0.293192	0.316324		645.3	36.1	457.2	12.6	1331.6	50.7	457	12.7		34.6	65.6654
24VG1	25		115.195	174.596	0.65978		1.8479	0.14349	0.158898	0.004659	0.083061	0.002261	0.491311	0.069314		1062.7	51.2	950.6	25.9	1269.8	53.1	947.9	26.3		13.3	25.1378
24VG1	26		178.451	396.448	0.450125		12.9135	0.971633	0.495133	0.015165	0.185182	0.004153	0.584572	0.367651		2673.4	70.9	2592.8	65.4	2699.1	37	2620.6	63.4		3.46	3.93835
24VG1	27		152.893	380.503	0.401819		4.32305	0.321568	0.298858	0.008534	0.10341	0.001774	0.703806	0.272271		1697.8	61.3	1685.6	42.4	1685.4	31.7	1685.3	42.5		-0.022	-0.0118666
24VG1	28		321.151	706.488	0.454574		3.28613	0.257174	0.253437	0.008415	0.093436	0.002423	0.664614	0.15969		1477.8	60.9	1456.2	43.3	1495.9	49.1	1457	43.6		1.65	2.65392
24VG1	29		117.967	269.049	0.438462		4.62206	0.341474	0.313532	0.008567	0.106462	0.00192	0.619283	0.184255		1753.3	61.7	1758.1	42	1738.9	33.1	1757.7	41.8		-0.831	-1.10415
24VG1	30		142.692	235.116	0.606901		4.78717	0.349964	0.320555	0.008322	0.106512	0.001736	0.47887	0.49712		1782.7	61.4	1792.4	40.6	1739.7	29.9	1790.9	39.6		-2.25	-3.02926
24VG1	31		91.5717	167.514	0.546651		1.95963	0.154616	0.183762	0.005517	0.077274	0.002621	0.285364	0.269162		1101.8	53	1087.5	30	1127.4	67.6	1089.7	28.9		1.46	3.53912
24VG1	32		80.6258	214.515	0.375852		5.91152	0.435621	0.358255	0.009673	0.118287	0.002117	0.492058	0.398934		1962.9	64	1973.9	45.9	1929.7	32.1	1971.6	44.3		-1.86	-2.29051		x
24VG1	33		62.8731	615.101	0.102216		3.15508	0.2321	0.249782	0.006763	0.089123	0.001671	0.520002	0.355384		1446.2	56.7	1437.4	34.9	1405.9	35.9	1438	34.8		-1.39	-2.24056
24VG1	34		283.716	353.15	0.803388		10.8889	0.799733	0.449401	0.012085	0.174431	0.002887	0.575448	0.433075		2513.7	68.3	2392.6	53.7	2599.9	27.6	2410	55		8.88	7.97338
24VG1	35		186.988	456.223	0.409862		3.94279	0.29282	0.283252	0.008039	0.100545	0.001964	0.634297	0.361092		1622.5	60.2	1607.7	40.4	1633.4	36.3	1608.2	40.5		1.09	1.57341
24VG1	36		192.65	258.878	0.744173		4.23508	0.316592	0.296855	0.008908	0.100387	0.00206	0.589979	0.403162		1680.8	61.4	1675.7	44.3	1630.4	38.1	1676.4	43.8		-2.05	-2.77846
24VG1	37		193.08	266.423	0.724711		3.18698	0.233979	0.251639	0.006792	0.091438	0.001571	0.540067	0.349422		1454	56.7	1446.9	35	1454.9	32.7	1447.4	34.9		0.31	0.549866
24VG1	38		24.2868	50.2723	0.483105		4.13019	0.307394	0.293759	0.008141	0.101267	0.002255	0.314014	0.446073		1660.3	60.8	1660.3	40.6	1646.6	41.3	1660.3	38		-0.602	-0.832017
24VG1	39		59.1356	137.972	0.428606		0.864415	0.069915	0.100427	0.00313	0.059339	0.002175	0.332669	0.220485		632.5	38.1	616.9	18.3	578.6	79.6	618.1	18.2		-1.58	-6.61943		x
24VG1	40		67.4976	131.721	0.512428		2.01715	0.158894	0.182831	0.005505	0.079904	0.002427	0.453464	0.168443		1121.3	53.5	1082.4	30	1193.7	59.9	1084.8	30		4.38	9.32395
24VG1	41		177.13	265.661	0.666751		3.96199	0.294047	0.28584	0.008095	0.099624	0.001642	0.781455	0.122196		1626.4	60.2	1620.7	40.6	1616.2	30.7	1619.6	40.1		-0.13	-0.278431		x
24VG1	42		285.304	235.932	1.20927		1.79092	0.133093	0.175869	0.004771	0.073834	0.001567	0.420713	0.155078		1042.2	48.4	1044.4	26.2	1036	42.9	1044.2	25.9		-0.323	-0.810811
24VG1	43		189.322	388.521	0.487288		2.61226	0.200105	0.197045	0.00664	0.093963	0.002335	0.621606	0.399339		1304.1	56.2	1159.4	35.8	1506.5	46.9	1149	36.8		15.5	23.0402
24VG1	44		489.653	500.898	0.97755		3.86671	0.28592	0.282811	0.008037	0.098474	0.001751	0.74416	0.385018		1606.8	59.7	1605.5	40.4	1594.6	33.2	1605.4	40.2		-0.468	-0.683557
24VG1	45		623.671	485.457	1.28471		1.82035	0.143563	0.173325	0.006833	0.074559	0.002472	0.492445	0.425961		1052.8	51.7	1030.4	37.5	1055.7	66.8	1034.8	36.6		0.735	2.39651
24VG1	46		679.762	1064.72	0.638442		2.97435	0.219738	0.2405	0.006916	0.089635	0.001623	0.638729	0.470233		1401.1	56.1	1389.3	35.9	1416.9	34.6	1389.2	36.1		1.18	1.94791
24VG1	47		372.72	754.364	0.494085		5.16915	0.377694	0.334522	0.008673	0.110566	0.001736	0.512885	0.414635		1847.6	62.2	1860.3	41.9	1807.9	28.5	1858.4	41		-2.23	-2.89839
24VG1	48		271.27	450.756	0.601812		3.29208	0.252339	0.254953	0.007917	0.092872	0.002347	0.581372	0.299094		1479.2	59.7	1464	40.7	1484.4	47.9	1465.4	40.6		0.781	1.37429
24VG1	49		209.846	292.605	0.717165		1.74897	0.128962	0.166069	0.004422	0.075626	0.001417	0.431537	0.371703		1026.8	47.6	990.4	24.4	1084.3	37.6	991.9	24.5		3.68	8.65996
24VG1	50		292.388	285.99	1.02237		0.554572	0.045416	0.062803	0.002239	0.063975	0.003021	0.117664	0.349886		448	29.7	392.6	13.6	739.9	99.9	399.9	13		12.1	46.9388
24VG1	51		865.374	1250.95	0.691772		1.80363	0.141473	0.173973	0.005665	0.074937	0.002109	0.595389	0.19813		1046.8	51.2	1034	31.1	1065.9	56.6	1034	31.2		1.29	2.99278
24VG1	52		80.1604	353.367	0.226848		2.32398	0.172565	0.209492	0.005879	0.080125	0.001712	0.370138	0.486658		1219.6	52.7	1226.1	31.3	1199.2	42.1	1225.2	30.4		-1.04	-2.24316
24VG1	53		97.2879	810.301	0.120064		13.9123	1.04849	0.506379	0.015596	0.196408	0.004226	0.632613	0.323864		2743.8	71.4	2641.2	66.7	2795.8	35.2	2674	66.7		5.53	5.52972
24VG1	54		74.7903	290.542	0.257416		5.0995	0.380319	0.328114	0.009419	0.112212	0.002443	0.462274	0.461386		1836	63.3	1829.2	45.7	1834.7	39.4	1830.7	44		0.158	0.299777
24VG1	55		48.8555	283.43	0.172372		3.99191	0.295588	0.286087	0.007962	0.100346	0.001709	0.696536	0.317849		1632.6	60.1	1621.9	39.9	1629.7	31.7	1621.4	40		0.379	0.478616
24VG1	56		91.6114	196.085	0.467204		2.70947	0.20479	0.227832	0.006584	0.086088	0.002152	0.468525	0.201093		1331.1	56.1	1323.1	34.6	1339.3	48.3	1324	34.2		0.618	1.20959
24VG1	57		186.049	294.716	0.631283		3.1743	0.241212	0.23772	0.007044	0.095444	0.002282	0.446673	0.243371		1450.9	58.7	1374.8	36.7	1536	45	1382.5	36.7		6.36	10.4948
24VG1	58		310.525	815.556	0.380753		2.70774	0.210667	0.227367	0.007371	0.086344	0.001936	0.766815	-0.00829		1330.6	57.7	1320.7	38.7	1345	43.3	1319.1	38.4		1.15	1.80669
24VG1	59		93.9464	151.893	0.618504		0.825075	0.062828	0.098337	0.002682	0.060729	0.00173	0.141932	0.356473		610.9	35	604.7	15.7	628.7	61.4	605.5	15		0.828	3.8174
24VG1	60		283.237	276.932	1.02277		3.88038	0.302641	0.283577	0.008821	0.097539	0.00229	0.653937	0.056368		1609.6	63	1609.4	44.3	1576.8	43.9	1609.4	44.2		-1.43	-2.06748
24VG1	61		83.441	186.574	0.447228		5.95485	0.443312	0.357866	0.009877	0.11974	0.002312	0.516004	0.2499		1969.3	64.7	1972.1	46.9	1951.5	34.5	1971.5	45.5		-0.901	-1.0556
24VG1	62		145.005	221.754	0.653901		3.88195	0.304441	0.281265	0.008797	0.100844	0.003188	0.508021	-0.00875		1609.9	63.3	1597.7	44.3	1638.9	58.7	1599.7	43.4		1.66	2.51388
24VG1	63		299.777	470.822	0.636709		3.99715	0.302794	0.286602	0.008875	0.101402	0.002438	0.627872	0.148648		1633.6	61.5	1624.5	44.5	1649.1	44.6	1625.5	44.3		1.01	1.49172
24VG1	64		226.088	466.79	0.484346		3.47066	0.258152	0.26637	0.007351	0.094326	0.001952	0.366425	0.455488		1520.6	58.6	1522.3	37.4	1513.8	39.1	1522	35.9		-0.346	-0.561501
24VG1	65		109.323	415.031	0.263411		3.16531	0.235464	0.251259	0.007316	0.090808	0.001712	0.64426	0.307212		1448.7	57.4	1445	37.7	1441.7	35.9	1445	37.7		-0.142	-0.228896
24VG1	66		271.203	244.014	1.11142		4.52847	0.338618	0.314991	0.008961	0.103803	0.002166	0.501774	0.338787		1736.2	62.2	1765.2	43.9	1692.4	38.5	1759.4	42.3		-2.84	-4.30158
24VG1	67		226.62	232.437	0.974975		0.773667	0.067263	0.093944	0.002762	0.059243	0.002344	0.573413	-0.2344		581.9	38.5	578.8	16.3	575.1	86	578.5	16		-0.116	-0.643366
24VG1	68		90.474	197.401	0.458325		4.01523	0.298109	0.287375	0.007928	0.100215	0.0019	0.525858	0.347971		1637.3	60.4	1628.4	39.7	1627.2	35.3	1629.4	39.3		-0.132	-0.0737463
24VG1	69		229.355	293.401	0.781714		4.35002	0.318519	0.302293	0.00775	0.102792	0.001667	0.527624	0.357671		1702.9	60.5	1702.7	38.4	1674.3	30	1702.7	38.1		-1.26	-1.69623		x
24VG1	70		465.275	829.786	0.560716		2.24407	0.165171	0.202589	0.005584	0.079818	0.001473	0.503812	0.473933		1194.9	51.7	1189.2	29.9	1191.6	36.4	1189.5	29.9		0.0768	0.20141
24VG1	71		425.002	365.037	1.16427		3.86387	0.287022	0.281321	0.007853	0.099094	0.001851	0.624232	0.247893		1606.2	59.9	1598	39.5	1606.3	34.8	1598.3	39.6		0.344	0.516715
24VG1	72		200.24	182.923	1.09467		4.15829	0.32105	0.274975	0.008516	0.108046	0.003005	0.470077	0.223187		1665.8	63.2	1566	43.1	1765.9	50.8	1578.4	43.2		7.94	11.32
24VG1	73		438.699	1175.88	0.373081		2.84612	0.214373	0.221824	0.007072	0.091053	0.002229	0.448794	0.526972		1367.8	56.6	1291.5	37.3	1446.9	46.6	1301.3	37.2		5.87	10.7402
24VG1	74		68.011	193.689	0.351134		4.25165	0.321968	0.294839	0.009307	0.103862	0.002843	0.336369	0.566925		1684.1	62.3	1665.7	46.3	1693.4	50.5	1670.8	42.8		0.891	1.63576
24VG1	75		1494.88	1037.06	1.44146		4.1219	0.303526	0.293125	0.008253	0.101095	0.001756	0.667174	0.275995		1658.7	60.2	1657.1	41.1	1643.5	32.2	1657.2	41.2		-0.603	-0.827502
24VG1	76		109.572	225.058	0.486863		1.80984	0.134369	0.176304	0.004695	0.073353	0.001461	0.380976	0.301564		1049	48.6	1046.8	25.7	1022.8	40.3	1047	25.4		-0.984	-2.3465		x
24VG1	77		661.003	1073.2	0.615917		3.74828	0.289942	0.272613	0.009785	0.098634	0.002669	0.511278	0.000386		1581.7	62	1554.1	49.6	1597.6	50.5	1561.3	47.6		1.42	2.72283
24VG1	78		205.281	191.276	1.07322		4.09226	0.304881	0.291989	0.008203	0.100678	0.002252	0.300495	0.409764		1652.8	60.8	1651.5	40.9	1635.8	41.5	1651.8	38.1		-0.711	-0.959775
24VG1	79		144.535	259.752	0.556433		2.69096	0.199116	0.227929	0.00629	0.085353	0.001696	0.436246	0.415919		1326	54.8	1323.6	33	1322.7	38.5	1323.9	32.5		-0.0629	-0.0680426
24VG1	80		86.1517	194.846	0.442153		2.96475	0.221638	0.239236	0.006623	0.089235	0.001797	0.5446	0.212455		1398.6	56.8	1382.7	34.5	1408.3	38.5	1383.4	34.5		1.04	1.81779
24VG1	81		33.3095	88.1165	0.378017		1.59942	0.120536	0.163319	0.004462	0.069826	0.001687	0.331051	0.320897		970	47.1	975.2	24.7	922.3	49.7	974.6	24.2		-2.06	-5.73566		x
24VG1	82		82.5016	192.253	0.429131		4.25074	0.316134	0.299773	0.008293	0.101588	0.002125	0.432925	0.349414		1683.9	61.1	1690.2	41.1	1652.5	38.8	1689	39.7		-1.58	-2.28139
24VG1	83		239.873	481.779	0.49789		3.38631	0.250726	0.259955	0.007163	0.093559	0.001866	0.48531	0.409977		1501.2	58	1489.6	36.6	1498.4	37.7	1490.9	36.3		0.291	0.587293
24VG1	84		154.217	323.177	0.477192		1.80311	0.147121	0.172665	0.006799	0.074295	0.002339	0.652811	0.264909		1046.6	53.3	1026.8	37.4	1048.6	63.5	1027.6	37.6		0.814	2.07896		x
24VG1	85		202.145	217.631	0.928845		1.83844	0.14589	0.174854	0.005769	0.075068	0.002431	0.397094	0.384901		1059.3	52.2	1038.8	31.7	1069.4	65.1	1041.6	31		1.03	2.86142		x
24VG1	86		430.329	1006.84	0.427405		3.39639	0.25357	0.266789	0.008318	0.091585	0.001931	0.59012	0.502851		1503.6	58.6	1524.5	42.3	1457.9	40.1	1521.2	41.4		-2.63	-4.56821
24VG1	87		199.324	331.959	0.600448		1.61584	0.11919	0.164331	0.004254	0.069924	0.001204	0.485749	0.258581		976.4	46.3	980.8	23.6	925.2	35.4	980.7	23.5		-2.21	-6.00951
24VG1	88		151.737	168.549	0.900256		3.34095	0.244939	0.261179	0.006877	0.09238	0.001645	0.373989	0.452497		1490.7	57.3	1495.9	35.2	1474.4	33.8	1495	34		-0.866	-1.45822
24VG1	89		177.57	451.235	0.39352		1.2537	0.101884	0.117825	0.004334	0.075431	0.002415	0.608036	0.126446		825.1	45.9	718	25	1079.1	64.2	707.5	25.2		15.4	33.4631
24VG1	90		293.358	1166.44	0.251498		4.61006	0.345794	0.308817	0.009407	0.10866	0.002583	0.454534	0.49209		1751.1	62.6	1734.9	46.3	1776.3	43.4	1738.7	44.4		1.59	2.33069
24VG1	91		77.8399	337.522	0.230622		1.80856	0.134016	0.177515	0.004703	0.072825	0.001359	0.388936	0.36653		1048.6	48.5	1053.4	25.7	1008.2	37.9	1053	25.4		-1.79	-4.48324		x
24VG1	92		687.158	1132.3	0.60687		1.95906	0.14816	0.183375	0.005629	0.078015	0.001667	0.614566	0.376358		1101.6	50.8	1085.4	30.7	1146.4	42.5	1085.1	30.8		2.52	5.321
24VG1	93		140.875	373.618	0.377055		4.1136	0.302045	0.292631	0.007884	0.10162	0.001683	0.602693	0.409675		1657	60	1654.7	39.3	1653.1	30.7	1654.8	39.3		-0.0787	-0.0967879
24VG1	94		30.9416	772.113	0.0400739		1.41841	0.108934	0.143286	0.004416	0.071897	0.001814	0.544076	0.198256		896.7	45.7	863.2	24.9	982.1	51.4	862.8	25		4.76	12.1067
24VG1	95		65.1029	109.093	0.596764		4.44816	0.336167	0.310611	0.009289	0.103898	0.002716	0.352528	0.480286		1721.4	62.7	1743.7	45.7	1694.1	48.2	1737.5	42.1		-1.78	-2.92781
24VG1	96		57.3865	97.3531	0.589467		2.64298	0.199022	0.229024	0.006409	0.083708	0.002	0.426121	0.301767		1312.7	55.5	1329.4	33.6	1284.9	46.5	1327.1	32.8		-1.7	-3.4633
24VG1	97		261.94	346.875	0.755142		3.68742	0.27565	0.274761	0.008463	0.097724	0.002204	0.541606	0.434967		1568.6	59.7	1564.9	42.8	1580.3	42.2	1565.5	42		0.626	0.974499
24VG1	98		421.316	519.634	0.810793		4.3834	0.322707	0.302203	0.008453	0.102918	0.001869	0.539912	0.505649		1709.2	60.9	1702.2	41.8	1676.6	33.6	1703.2	41.3		-1.2	-1.5269
24VG1	99		18.4396	51.8201	0.355838		4.15002	0.312883	0.296522	0.00857	0.101572	0.002753	0.182788	0.486677		1664.2	61.7	1674	42.6	1652.2	50.2	1671.2	37.7		-0.771	-1.31945
24VG1	100		525.866	343.889	1.52917		4.07137	0.310688	0.286404	0.009171	0.1023	0.002831	0.409871	0.470755		1648.6	62.2	1623.5	46	1665.4	51.2	1629.7	43.6		1.43	2.51591
24VG1	101		96.0459	62.5256	1.5361		3.91134	0.306951	0.281606	0.009352	0.101373	0.003005	0.512223	0.256911		1616	63.5	1599.4	47	1648.6	55	1602.8	45.8		1.92	2.98435
24VG1	102		216.829	781.399	0.277489		2.32245	0.172299	0.208789	0.005574	0.080314	0.001396	0.409764	-0.04128		1219.2	52.7	1222.4	29.7	1203.8	34.2	1222	29.3		-0.744	-1.54511		x
24VG1	103		842.587	3116.16	0.270393		0.477286	0.036662	0.062231	0.002038	0.056172	0.001552	0.555562	0.344944		396.2	25.2	389.2	12.4	458.2	61.3	388.8	12.3		2.57	15.0589
24VG1	104		318.22	227.944	1.39604		4.05898	0.298289	0.288891	0.007697	0.10161	0.001694	0.576226	0.391377		1646.1	59.9	1636	38.5	1652.9	30.9	1636.6	38.5		0.703	1.02245
24VG1	105		114.488	102.548	1.11644		6.07601	0.450505	0.362832	0.009956	0.121954	0.002396	0.450694	0.351264		1986.8	64.6	1995.6	47.1	1984.2	35	1993.5	44.8		-0.387	-0.574539
24VG1	106		414.052	1482.69	0.279258		12.5956	0.956712	0.506708	0.017951	0.18072	0.003267	0.863724	0.39069		2649.9	71.5	2642.6	76.8	2658.7	30	2648.1	71.6		0.458	0.605559
24VG1	107		105.471	107.726	0.979067		1.64111	0.126534	0.162769	0.004892	0.073497	0.002047	0.431348	0.265726		986.1	48.6	972.1	27.1	1026.8	56.3	973.3	26.9		2.1	5.32723
24VG1	108		42.6096	99.7925	0.426983		2.02396	0.155692	0.189188	0.005836	0.074447	0.001976	0.394455	0.357792		1123.6	52.3	1117	31.6	1052.7	53.5	1117.9	30.9		-2.69	-6.1081
24VG1	109		91.2672	484.87	0.18823		1.93934	0.145319	0.185155	0.004906	0.075665	0.001597	0.76953	-0.606		1094.8	50.2	1095.1	26.7	1085.3	42.3	1095.2	25		-0.404	-0.902976
24VG1	110		43.6117	121.118	0.360076		2.95885	0.222155	0.24064	0.006797	0.088262	0.001743	0.630058	0.161383		1397.1	57	1390	35.3	1387.3	37.9	1389.9	35.4		-0.107	-0.194623
24VG1	111		395.562	772.845	0.511825		1.7701	0.132416	0.174865	0.005037	0.073298	0.001532	0.517652	0.337679		1034.6	48.5	1038.9	27.6	1021.3	42.3	1038.7	27.6		-0.695	-1.72329
24VG1	112		179.391	531.473	0.337536		4.04931	0.299904	0.277588	0.007835	0.106093	0.001894	0.63286	0.3357		1644.2	60.3	1579.2	39.5	1732.5	32.8	1577.9	40.2		6.85	8.84848
24VG1	113		127.991	200.145	0.639494		4.15222	0.309626	0.295764	0.00869	0.102121	0.002043	0.567718	0.349829		1664.6	61	1670.3	43.2	1662.2	37	1669.4	42.5		-0.3	-0.487306
24VG1	114		544.729	832.939	0.653984		0.671457	0.052769	0.082081	0.002668	0.058852	0.001975	0.314436	0.368598		521.6	32.1	508.5	15.9	560.6	73.1	509.7	15.6		1.81	9.29361		x
24VG1	115		309.288	439.133	0.704314		4.3068	0.325109	0.302357	0.009078	0.101899	0.002302	0.567425	0.32305		1694.7	62.2	1703	44.9	1658.2	41.8	1701.6	44		-1.88	-2.70172
24VG1	116		163.13	626.79	0.260263		4.6256	0.341817	0.311618	0.008816	0.107802	0.001833	0.716174	0.363926		1753.9	61.7	1748.7	43.3	1761.8	31.1	1748.5	43.4		0.595	0.743558
24VG1	117		113.061	134.969	0.83768		5.33737	0.395965	0.33596	0.009179	0.116084	0.0023	0.526944	0.295041		1874.9	63.4	1867.2	44.3	1896	35.6	1868.4	43.5		1.22	1.51899		x
24VG1	118		351.842	524.228	0.671163		0.512499	0.040725	0.065538	0.002222	0.056955	0.001956	0.262441	0.431587		420.1	27.3	409.2	13.4	488.8	75.8	410.4	13.1		2.76	16.2848
24VG1	119		18.397	279.626	0.0657917		1.6285	0.122653	0.164094	0.004632	0.072022	0.001615	0.462977	0.256492		981.3	47.4	979.5	25.7	985.6	45.6	979.6	25.6		0.239	0.618912
24VG1	120		281.082	407.453	0.689852		3.78667	0.279216	0.281116	0.007804	0.097939	0.001643	0.688317	0.377969		1589.9	59.2	1597	39.3	1584.4	31.4	1597.2	39.2		-0.563	-0.795254
24VG1	121		309.641	175.173	1.76763		0.7756	0.059641	0.093673	0.002608	0.060329	0.001766	0.264593	0.275248		583	34.1	577.2	15.4	614.4	63.2	577.7	15.1		1.35	6.05469		x
24VG1	122		495.168	807.137	0.613487		0.657863	0.048702	0.082803	0.002214	0.057604	0.001077	0.406584	0.30785		513.3	29.8	512.8	13.2	513.7	41.1	512.8	13.2		0.0329	0.1752		x
24VG1	123		582.664	428.195	1.36074		1.62027	0.12182	0.162249	0.005148	0.071758	0.001659	0.509893	0.496617		978.1	47.2	969.3	28.6	978.2	47.1	969.9	28.4		0.306	0.909834		x
24VG1	124		36.4631	92.1214	0.395816		3.18013	0.241364	0.251907	0.007497	0.088274	0.002481	0.191892	0.517833		1452.3	58.6	1448.3	38.6	1387.6	54	1449.3	34.9		-2.67	-4.37446
24VG1	125		223.711	261.388	0.855857		2.01968	0.148974	0.189834	0.005005	0.077608	0.001507	0.315183	0.405071		1122.2	50.1	1120.5	27.1	1136	38.6	1120.7	26.4		0.618	1.36444
24VG1	126		81.3044	179.845	0.452081		2.58966	0.19112	0.225081	0.005957	0.082556	0.001523	0.476363	0.3483		1297.7	54.1	1308.7	31.3	1257.9	36.1	1307.8	31.1		-2.06	-4.03848
24VG1	127		324.256	390.191	0.831019		3.03595	0.236059	0.240408	0.007647	0.09079	0.002674	0.401823	0.409227		1416.7	59.4	1388.8	39.7	1441.3	56.1	1394	38.5		1.88	3.64254		x
24VG1	128		147.071	143.122	1.02759		4.14519	0.305892	0.293725	0.007817	0.101772	0.001917	0.40359	0.327291		1663.3	60.4	1660.1	39	1655.9	34.9	1660.7	37.7		-0.229	-0.253639		x
24VG1	129		92.9214	223.851	0.415104		3.1731	0.235598	0.254573	0.007011	0.090818	0.001838	0.448181	0.38039		1450.6	57.3	1462	36	1441.9	38.6	1460.4	35.2		-0.748	-1.39399
24VG1	130		82.9674	160.184	0.517952		3.66086	0.277917	0.275952	0.009068	0.096431	0.001992	0.751257	0.321769		1562.9	60.5	1570.9	45.8	1555.3	38.8	1570.8	45.6		-0.668	-1.00302
24VG1	131		11.2957	37.4898	0.3013		2.20966	0.172903	0.189189	0.005556	0.085357	0.003066	0.081464	0.459232		1184.1	54.7	1117	30.1	1322.8	69.6	1130.2	27.7		7.54	15.5579
24VG1	132		146.014	532.569	0.274168		0.531402	0.045541	0.061041	0.001943	0.060502	0.002633	0.421305	0.051036		432.7	30.2	382	11.8	620.6	93.9	380.8	11.8		9.02	38.4467
24VG1	133		24.8733	632.431	0.0393296		2.70378	0.201426	0.226316	0.0067	0.085985	0.001918	0.418088	0.532412		1329.5	55.2	1315.2	35.2	1337	43.1	1317.4	34.4		0.762	1.63052
24VG1	134		79.7815	182.189	0.437905		1.79148	0.13314	0.177256	0.004693	0.073292	0.001564	0.313407	0.337413		1042.4	48.4	1052	25.7	1021.1	43.2	1050.8	25		-1.15	-3.02615
24VG1	135		137.53	248.334	0.553808		1.85576	0.158697	0.174854	0.007369	0.075294	0.003703	0.337734	0.400037		1065.5	56.4	1038.8	40.4	1075.5	98.7	1045.5	37.8		1.05	3.41237
24VG1	136		390.738	317.977	1.22883		5.82515	0.449756	0.340974	0.011176	0.122424	0.003158	0.541016	0.319747		1950.2	66.9	1891.4	53.7	1991.1	45.9	1905	52.7		3.64	5.00728
24VG1	137		39.7892	80.1224	0.496606		2.01346	0.157761	0.191456	0.005684	0.076489	0.002357	0.410485	0.253512		1120.1	53.2	1129.3	30.8	1107	61.6	1128.2	30.2		-0.828	-2.01445
24VG1	138		83.7359	181.598	0.461104		4.08582	0.300129	0.292879	0.007688	0.099951	0.001669	0.521083	0.389604		1651.5	59.9	1655.9	38.3	1622.3	31.1	1655.4	37.9		-1.44	-2.07113		x
24VG1	139		46.4087	62.1932	0.746203		2.59223	0.1991	0.225655	0.006785	0.084602	0.002787	0.090278	0.522882		1298.4	56.3	1311.7	35.7	1305.6	64	1308.1	31.2		-0.215	-0.467218
24VG1	140		82.5866	135.731	0.608456		3.39513	0.250272	0.263513	0.006954	0.092797	0.001716	0.389865	0.377993		1503.3	57.8	1507.8	35.5	1482.9	35	1507.1	34.4		-1.02	-1.67914		x
24VG1	141		49.6955	131.553	0.377759		2.94008	0.218982	0.240715	0.006449	0.088433	0.001829	0.314195	0.27108		1392.3	56.4	1390.4	33.5	1391	39.7	1390.7	32.2		0.0182	0.0431344
24VG1	142		157.82	655.184	0.240879		1.78711	0.135336	0.172502	0.005218	0.074949	0.001988	0.343447	0.405331		1040.8	49.3	1025.9	28.7	1066.2	53.3	1028	27.9		1.47	3.77978
24VG1	143		341.439	699.508	0.488113		4.10889	0.309655	0.291933	0.008121	0.102115	0.002303	0.572071	-0.18993		1656.1	61.5	1651.2	40.5	1662.1	41.7	1651.6	40.4		0.453	0.655797
24VG1	144		198.004	260.035	0.761454		0.849818	0.064484	0.100686	0.002763	0.061378	0.001656	0.156823	0.383095		624.5	35.4	618.4	16.2	651.5	57.9	619.2	15.5		1.18	5.08058
24VG1	145		31.9368	26.7137	1.19552		12.4228	0.966394	0.497306	0.017098	0.182677	0.005523	0.47045	0.398022		2636.9	73.1	2602.2	73.6	2676.6	50	2619.2	64		2.56	2.77965
24VG1	146		158.59	328.777	0.482365		0.589407	0.045005	0.074303	0.002043	0.057564	0.001531	0.317351	0.224079		470.5	28.8	462	12.3	512.2	58.4	462.4	12.2		1.8	9.80086
24VG1	147		227.837	143.311	1.58981		3.40155	0.264296	0.268887	0.00858	0.0911	0.002733	0.394282	0.360424		1504.8	61	1535.1	43.6	1447.8	57.1	1527.4	40.7		-3.22	-6.02984
24VG1	148		220.945	612.928	0.360475		0.544937	0.040354	0.0704	0.001861	0.05577	0.001079	0.406786	0.3109		441.7	26.5	438.6	11.2	442.2	43	438.6	11.2		0.131	0.814111
24VG1	149		65.6599	177.447	0.370025		2.06342	0.153887	0.195357	0.00533	0.076623	0.001687	0.331708	0.409331		1136.8	51	1150.3	28.7	1110.5	44	1148.4	27.8		-1.48	-3.58397		x
24VG1	150		210.052	288.939	0.726977		3.54777	0.267233	0.268536	0.007635	0.09551	0.002136	0.50413	0.221043		1537.9	59.7	1533.4	38.8	1537.3	42.1	1533.9	38.3		0.133	0.253692		x
24VG1	151		79.8695	161.725	0.493859		2.74337	0.203991	0.229905	0.006259	0.086558	0.001795	0.402855	0.364847		1340.3	55.3	1334	32.8	1349.8	40	1334.8	32.2		0.609	1.17054
24VG1	152		59.4896	158.598	0.375097		2.56292	0.194614	0.226621	0.006957	0.080198	0.002149	0.436144	0.400026		1290.1	55.5	1316.8	36.6	1201	52.8	1311.9	35.2		-4.47	-9.64197
24VG1	153		819.725	441.805	1.8554		1.59455	0.11765	0.162037	0.004512	0.07162	0.001386	0.434369	0.475823		968.1	46	968.1	25	974.2	39.5	968.1	24.8		0.246	0.626155
24VG1	154		340.307	253.282	1.34359		4.27381	0.312451	0.298366	0.0077	0.102381	0.00163	0.518177	0.445604		1688.3	60.2	1683.2	38.2	1666.9	29.5	1683.7	37.9		-0.757	-0.977863		x
24VG1	155		150.86	179.954	0.838322		3.84188	0.28846	0.281957	0.008248	0.098543	0.002066	0.566163	0.235829		1601.6	60.5	1601.2	41.5	1595.9	39.1	1601.3	41.1		-0.236	-0.332101
24VG1	156		213.302	556.206	0.383495		2.92737	0.21437	0.240218	0.006235	0.086906	0.00132	0.607699	0.393379		1389	55.4	1387.8	32.4	1357.5	29.3	1387.8	32.4		-1.28	-2.23204		x
24VG1	157		132.094	223.52	0.59097		1.75136	0.135654	0.173299	0.00508	0.072259	0.002096	0.308808	0.312562		1027.7	50.1	1030.3	27.9	992.3	59	1029.9	27		-1.5	-3.82949
24VG1	158		188.386	537.2	0.350682		1.78636	0.130921	0.175226	0.004538	0.072883	0.001187	0.53956	0.327661		1040.5	47.7	1040.8	24.9	1009.8	33	1040.8	24.9		-1.25	-3.06991
24VG1	159		244.642	486.597	0.502762		3.37791	0.247594	0.26399	0.006975	0.092514	0.001619	0.388309	0.488839		1499.3	57.4	1510.2	35.6	1477.1	33.2	1508.4	34.4		-1.3	-2.24088		x
24VG1	160		34.5146	129.156	0.267233		5.17647	0.384903	0.333021	0.009444	0.113361	0.002549	0.35094	0.488409		1848.8	63.3	1853	45.7	1853.2	40.6	1851.9	42.4		0.1	0.0107921		x
24VG1	161		402.709	1164.88	0.345709		3.2178	0.248054	0.250402	0.008196	0.092609	0.002304	0.603597	0.262249		1461.5	59.7	1440.5	42.3	1479.1	47.2	1442.6	42.2		1.5	2.6097
24VG1	162		621.794	831.745	0.747577		2.78855	0.212471	0.206963	0.006722	0.097659	0.002556	0.56395	0.332783		1352.5	56.9	1212.6	35.9	1579.1	49	1210.8	36.9		15.7	23.2094
24VG1	163		159.265	601.631	0.264723		4.90411	0.358723	0.330046	0.008604	0.107209	0.001721	0.511409	0.44157		1803	61.7	1838.6	41.7	1751.7	29.4	1832.7	40.4		-3.49	-4.9609
24VG1	164		13.42	19.9964	0.671123		1.88289	0.162486	0.177404	0.006401	0.078249	0.004196	0.172361	0.403937		1075.1	57.2	1052.8	35	1152.3	106.4	1057.8	32.2		3.67	8.6349
24VG1	165		52.9339	477	0.110973		2.03824	0.151984	0.192656	0.005387	0.07628	0.001515	0.486752	0.336875		1128.4	50.8	1135.7	29.1	1101.5	39.7	1135.2	28.9		-1.36	-3.10486
24VG1	166		90.6403	268.392	0.337716		1.78845	0.133246	0.176749	0.004717	0.073133	0.001544	0.399716	0.260717		1041.3	48.5	1049.2	25.8	1016.7	42.8	1048.5	25.5		-1.26	-3.19662
24VG1	167		385.573	430.568	0.895497		2.99277	0.222164	0.241304	0.006676	0.089441	0.001751	0.424029	0.415739		1405.8	56.5	1393.5	34.7	1412.8	37.5	1395.1	34		0.707	1.36608
24VG2A	1		44.0005	156.644	0.280894		3.19894	0.129759	0.257185	0.00828521	0.0920058	0.00158419	0.321332	0.49004		1456.9	31.4	1475.4	42.5	1466.7	32.7	1462.2	28.5		-0.94	-0.593168		x
24VG2A	2		455.187	344.92	1.31969		4.05898	0.16349	0.293333	0.00937974	0.102583	0.00136073	0.55025	0.372598		1646.1	32.8	1658.2	46.8	1670.5	24.5	1647.9	32.1		1.4	0.736306		x
24VG2A	3		75.6373	162.87	0.464402		3.56564	0.164276	0.274192	0.00970341	0.0968444	0.00192937	0.667281	0.0956315		1541.9	36.5	1562	49.1	1563.4	37.3	1543.9	36		1.7	0.0895484
24VG2A	4		292.501	556.642	0.525475		4.69816	0.190752	0.318249	0.0103912	0.109629	0.00146302	0.618096	0.300283		1766.9	34	1781.2	50.8	1792.4	24.3	1767.7	33.8		1.6	0.624861
24VG2A	5		909.992	436.351	2.08546		3.02561	0.122554	0.24599	0.00776983	0.0910872	0.00129844	0.483592	0.276151		1414.1	30.9	1417.8	40.2	1447.6	27.1	1415	29.3		1.5	2.05858
24VG2A	6		187.389	294.558	0.63617		2.85533	0.122307	0.239374	0.0080286	0.0884102	0.00146936	0.554631	0.284852		1370.2	32.2	1383.4	41.8	1390.5	31.9	1373.2	31		1.2	0.510608
24VG2A	7		42.424	70.8128	0.599101		1.62159	0.0912989	0.163521	0.00590668	0.0731104	0.00324243	0.138017	0.327052		978.6	35.4	976.3	32.7	1016.1	89.8	977.4	25.6		1.5	3.91694		x
24VG2A	8		50.0204	78.234	0.639368		2.42552	0.110428	0.214092	0.00703611	0.0833449	0.0021768	0.267147	0.297041		1250.2	32.7	1250.6	37.4	1276.4	50.9	1250.4	27.7		1.1	2.02131		x
24VG2A	9		481.795	645.518	0.74637		1.53685	0.0642432	0.151294	0.00506964	0.073939	0.00119653	0.583671	0.329489		945.2	25.7	908.2	28.4	1038.9	32.7	930.4	24.4		3.8	12.5806
24VG2A	10		179.683	143.021	1.25634		1.67684	0.0812948	0.163761	0.00575536	0.0739887	0.00242203	0.219151	0.383529		999.8	30.8	977.6	31.9	1040.3	66.1	989	24.7		1.8	6.02711
24VG2A	11		89.8327	174.458	0.514925		3.20661	0.136222	0.25233	0.00836152	0.09091	0.0016598	0.444133	0.327776		1458.8	32.9	1450.5	43	1443.9	34.8	1456.5	31.1		-0.8	-0.457095		x
24VG2A	12		31.1118	38.4681	0.808769		5.53493	0.257862	0.335982	0.0118493	0.118174	0.00344044	0.325955	0.356243		1906	40.1	1867.3	57.2	1928	52.1	1895.9	37.7		1.4	3.14834
24VG2A	13		96.8508	252.791	0.383127		4.04554	0.182068	0.287121	0.0107064	0.100111	0.00250665	0.454028	0.433908		1643.4	36.6	1627.1	53.6	1625.3	46.6	1640.3	35.7		-1.2	-0.110749
24VG2A	14		130.049	679.652	0.191346		2.14973	0.0957656	0.194262	0.00705067	0.0774124	0.0018475	0.459642	0.426216		1165	30.9	1144.4	38.1	1130.9	47.5	1158.4	29		-1.9	-1.19374
24VG2A	15		147.7	88.2002	1.6746		3.38463	0.158824	0.258082	0.0100857	0.0923747	0.00278589	0.411652	0.433811		1500.8	36.8	1480	51.7	1474.3	57.2	1495.9	35.2		-1.7	-0.386624		x
24VG2A	16		19.8895	33.7065	0.590078		3.90994	0.206411	0.276929	0.0106822	0.0983178	0.00396598	0.221079	0.400774		1615.7	42.7	1575.9	53.9	1591.6	75.4	1601.3	37.4		1.7	0.986429		x
24VG2A	17		73.2508	137.502	0.532727		3.5405	0.170533	0.263251	0.00959	0.092368	0.00276481	0.366895	0.353692		1536.3	38.1	1506.5	48.9	1474.1	56.8	1526.8	35.3		-3.1	-2.19795
24VG2A	18		28.0779	246.132	0.114076		1.70441	0.0782987	0.165886	0.00598489	0.0702002	0.00197478	0.289928	0.453169		1010.2	29.4	989.4	33.1	933.3	57.7	1001.4	25.1		-3.4	-6.01093
24VG2A	19		187.209	699.319	0.267701		1.77525	0.0903735	0.170067	0.00645577	0.0711516	0.0023234	0.424209	0.26683		1036.4	33.1	1012.5	35.6	960.9	66.7	1025.8	29.2		-3.3	-5.36997
24VG2A	20		80.4588	216.849	0.371036		4.37026	0.202067	0.286582	0.00992893	0.102487	0.00224516	0.575062	0.215918		1706.7	38.2	1624.4	49.7	1668.8	40.5	1687.4	38.8		4	2.66059
24VG2A	21		96.5633	257.529	0.374961		3.49306	0.185795	0.260306	0.0117864	0.0911226	0.00290548	0.582971	0.272953		1525.6	42	1491.4	60.3	1448.3	60.7	1521.4	42.1		-4.4	-2.9759
24VG2A	22		15.284	27.2001	0.561911		1.78442	0.10278	0.1697	0.00638718	0.0709987	0.0031362	0.228985	0.282078		1039.8	37.5	1010.5	35.2	956.5	90.3	1023.7	28.7		-3.4	-5.64558
24VG2A	23		91.0917	148.434	0.613685		1.86187	0.101838	0.175391	0.00717913	0.0718987	0.00303467	0.312786	0.379674		1067.7	36.1	1041.7	39.4	982.2	86	1056.1	30.8		-3.7	-6.05783
24VG2A	24		87.5964	165.911	0.52797		1.94232	0.10824	0.1799	0.00761101	0.0731265	0.00321036	0.22612	0.452404		1095.8	37.4	1066.4	41.6	1016.6	88.9	1082.9	31.1		-3.6	-4.89868
24VG2A	25		33.99	41.4158	0.820701		3.08726	0.155164	0.243054	0.0101124	0.0867371	0.00349144	0.198228	0.551455		1429.5	38.5	1402.6	52.4	1353.8	77.6	1420.9	34.1		-3.6	-3.60467
24VG2A	26		92.6549	397.309	0.233206		4.72497	0.198175	0.312312	0.0103419	0.106721	0.00201258	0.386275	0.421417		1771.7	35.1	1752.1	50.8	1743.3	34.6	1767.2	33.6		-1.6	-0.50479
24VG2A	27		239.432	764.465	0.313202		2.55005	0.132176	0.21516	0.00903347	0.0836728	0.0033254	0.441745	0.292774		1286.5	37.8	1256.2	47.9	1284.1	77.4	1277.3	35.7		1.4	2.17273
24VG2A	28		32.0379	72.8103	0.440019		1.48937	0.114708	0.147941	0.00664125	0.0695981	0.00462779	0.291002	0.161231		926.1	46.8	889.4	37.3	915.6	136.8	901.5	33.4		1	2.86151
24VG2A	29		264.522	254.865	1.03789		1.66432	0.0766809	0.150654	0.00540006	0.0754845	0.00174344	0.560679	0.27363		995	29.2	904.6	30.3	1080.5	46.3	948.6	27.7		4.8	16.2795
24VG2A	30		54.8081	69.5339	0.788221		2.02136	0.137847	0.181426	0.00844266	0.0757564	0.00451367	0.240076	0.381486		1122.7	46.3	1074.8	46.1	1087.7	119.4	1097.8	37		2.1	1.18599
24VG2A	31		48.4471	273.191	0.177337		4.00635	0.175532	0.26843	0.00952789	0.100655	0.00253209	0.318692	0.492016		1635.5	35.6	1532.8	48.4	1635.4	46.7	1603.9	33.8		3.7	6.27369
24VG2A	32		129.241	184.222	0.701551		4.63964	0.201879	0.288558	0.00956106	0.107492	0.00221148	0.430501	0.302707		1756.4	36.3	1634.3	47.8	1756.5	37.6	1719.3	36		4.1	6.95702
24VG2A	33		142.539	352.696	0.404141		4.59294	0.188932	0.287901	0.00919384	0.10604	0.00163625	0.47114	0.332914		1748	34.3	1631	46	1731.6	28.3	1716.3	34.5		4.4	5.80966
24VG2A	34		99.7026	194.175	0.513467		6.65702	0.321956	0.360352	0.0128863	0.121659	0.00336954	0.482136	0.269437		2066.9	42.7	1983.8	61.1	1979.9	49.3	2050	42.8		-5.5	-0.19698
24VG2A	35		55.9487	143.488	0.38992		3.32828	0.137009	0.241528	0.0076344	0.0913029	0.00147582	0.359496	0.336497		1487.7	32.1	1394.6	39.6	1452.1	30.8	1453.6	30.1		3.8	3.95978
24VG2A	36		93.7785	197.5	0.474827		1.89519	0.0939626	0.169945	0.00622833	0.0743246	0.00242345	0.314423	0.384839		1079.4	33	1011.8	34.3	1049.4	65.7	1046	28		2.9	3.583
24VG2A	37		103.388	104.195	0.992254		1.5827	0.0818143	0.149432	0.00598884	0.0705399	0.00262738	0.35252	0.420882		963.4	32.2	897.8	33.6	943.2	76.3	931.2	27.8		3	4.8134
24VG2A	38		55.2175	48.629	1.13549		3.26973	0.166172	0.240029	0.00890785	0.0907955	0.00300232	0.279581	0.329651		1473.9	39.5	1386.8	46.3	1441.4	63	1437.7	35.1		3.2	3.78798
24VG2A	39		142.655	284.912	0.500697		3.75051	0.157401	0.257097	0.00836419	0.0976274	0.0016966	0.467747	0.32785		1582.2	33.6	1475	42.9	1578.4	32.5	1548.5	33.3		4	6.55094
24VG2A	40		67.9879	211.914	0.320828		1.57159	0.0715208	0.147766	0.00504092	0.0714777	0.00178948	0.361733	0.307299		959.1	28.2	888.4	28.3	970.2	51.1	921.9	24.1		2.8	8.43125
24VG2A	41		189.65	255.937	0.741005		4.15156	0.17374	0.277079	0.00888874	0.100725	0.00170876	0.424779	0.293771		1664.5	34.2	1576.6	44.9	1636.7	31.5	1638.2	33.3		3.6	3.67202
24VG2A	42		41.1439	137.625	0.298957		1.51652	0.0672963	0.14777	0.00479832	0.0691544	0.00175589	0.107186	0.471063		937.1	27.2	888.5	26.9	902.4	52.4	912	20.5		2.5	1.54034
24VG2A	43		189.379	877.183	0.215894		1.91867	0.0843058	0.17551	0.00599947	0.0741351	0.00161889	0.432958	0.352817		1087.6	29.3	1042.4	32.9	1044.2	44.1	1068.8	26.7		2.8	0.172381
24VG2A	44		186.714	383.221	0.487221		0.857149	0.0474801	0.0842596	0.00301741	0.0688685	0.0024367	0.415533	0.137366		628.6	26	521.5	17.9	893.9	73.1	538.8	17.8		12	41.6601
24VG2A	45		16.7007	54.5887	0.305938		4.1775	0.183761	0.274811	0.00892831	0.103782	0.0022209	0.406238	0.28822		1669.6	36	1565.2	45.1	1692	39.5	1633.4	34.7		3.5	7.49409
24VG2A	46		30.798	592.154	0.0520102		3.27775	0.155505	0.251748	0.00948119	0.0896059	0.00256132	0.395029	0.383051		1475.8	36.9	1447.5	48.8	1416.3	54.7	1467.7	34.7		-3	-2.20292
24VG2A	47		181.134	340.977	0.531222		3.59438	0.168552	0.266321	0.0102343	0.0928897	0.00197944	0.702381	0.303904		1548.3	37.3	1522.1	52.1	1484.8	40.4	1547.7	37.7		-3.7	-2.51212
24VG2A	48		31.9166	57.6743	0.553394		2.6167	0.128302	0.219467	0.00791125	0.0832561	0.00264824	0.341553	0.336422		1305.3	36	1279.1	41.8	1274.3	62	1294.9	31.9		-1.7	-0.376677		x
24VG2A	49		16.107	45.6075	0.353165		1.79734	0.0876586	0.1719	0.00593328	0.0732167	0.0023671	0.18711	0.399382		1044.5	31.8	1022.6	32.6	1019.1	65.5	1033.7	25		-1.4	-0.34344
24VG2A	50		38.0156	87.768	0.433137		6.35596	0.265676	0.366805	0.011764	0.121899	0.00221159	0.397338	0.310963		2026.2	36.7	2014.3	55.5	1983.4	32.3	2023.9	35.4		-2.1	-1.55793
24VG2A	51		69.1496	134.888	0.512645		3.35095	0.168295	0.266269	0.00954316	0.0948207	0.00288723	0.410615	0.306048		1493	39.3	1521.8	48.6	1523.7	57.4	1502.2	35.6		1.8	0.124696
24VG2A	52		43.407	119.594	0.362953		1.52121	0.0709115	0.172568	0.00592092	0.0691562	0.00172344	0.398145	0.263686		939	28.6	1026.2	32.6	902.5	51.4	970.9	24.4		-4.2	-13.7064
24VG2A	53		73.37	249.276	0.294332		2.06946	0.0896283	0.216812	0.00703956	0.0771628	0.00161622	0.382966	0.248542		1138.8	29.6	1265	37.3	1124.5	41.7	1175.3	25.9		-5.8	-12.4944
24VG2A	54		43.7252	80.806	0.541113		1.96357	0.11909	0.193426	0.0087007	0.08384	0.00446879	0.16407	0.521547		1103.1	40.8	1139.9	47	1288	103.8	1118.1	32.8		8	11.4984
24VG2A	55		116.17	572.307	0.202985		4.51762	0.195237	0.357332	0.0119868	0.105865	0.00207574	0.506739	0.27678		1734.2	35.9	1969.5	56.9	1728.6	36	1752.1	33.6		-11	-13.9361
24VG2A	56		189.351	840.213	0.22536		3.16562	0.217519	0.276723	0.0130343	0.0962418	0.00491272	0.483548	0.0999541		1448.8	53	1574.8	65.8	1551.7	95.9	1482	47.3		-7.5	-1.48869
24VG2A	57		140.005	300.513	0.465885		1.64148	0.0700142	0.194502	0.00622636	0.0718831	0.00148311	0.279253	0.363976		986.3	26.9	1145.7	33.6	981.7	42	1036.6	22.4		-8	-16.7057
24VG2A	58		28.4293	82.3919	0.345049		1.81851	0.0827801	0.210383	0.00696533	0.0741374	0.00174669	0.396803	0.193225		1052.1	29.8	1230.9	37.1	1044.3	47.5	1102.3	25.5		-8.9	-17.8684
24VG2A	59		53.0446	135.347	0.391916		1.66972	0.0780443	0.199549	0.00696863	0.0714873	0.00168736	0.537471	0.113391		997.1	29.7	1172.9	37.5	970.5	48.1	1034.5	26.4		-10	-20.8552
24VG2A	60		47.3076	127.409	0.371304		1.5172	0.0659558	0.181663	0.00593061	0.0712713	0.00172746	0.164577	0.437419		937.3	26.6	1076.1	32.4	964.3	49.5	986.8	21.2		-7.2	-11.5939
24VG2A	61		230.203	265.991	0.865457		3.36516	0.141829	0.306946	0.0101089	0.0930871	0.00176995	0.422858	0.365757		1496.3	33	1725.7	49.9	1488.8	36	1530	30		-10	-15.9121
24VG2A	62		166.025	453.255	0.366296		2.04685	0.0866178	0.222294	0.00715393	0.0773719	0.00161761	0.285844	0.371208		1131.2	28.9	1294	37.7	1129.9	41.6	1177.9	24.5		-7.6	-14.5234
24VG2A	63		222.155	377.782	0.588051		4.87834	0.203277	0.362124	0.0116774	0.111458	0.00166461	0.602117	0.225401		1798.5	35.1	1992.2	55.3	1822.5	27.1	1801	33.4		-10	-9.31139
24VG2A	64		826.043	550.89	1.49947		1.83773	0.0813706	0.201821	0.00663192	0.074392	0.00162229	0.443234	0.209429		1059	29.1	1185.1	35.6	1051.2	43.9	1095.6	25.5		-6.3	-12.7378
24VG2A	65		737.377	820.49	0.898704		0.553707	0.0255701	0.071026	0.00262113	0.0635322	0.00163531	0.620331	0.247388		447.4	16.7	442.3	15.8	725.1	54.6	444.5	14.6		10	39.0015
24VG2A	66		55.2484	98.5832	0.560424		11.2128	0.566431	0.514817	0.0219316	0.172475	0.00522264	0.573415	0.428285		2541	47.1	2677.2	93.3	2581.1	50.6	2533.3	46.3		-6.9	-3.72322
24VG2A	67		24.5498	73.8637	0.332367		1.54889	0.072908	0.170047	0.00564528	0.0708171	0.0019166	0.267363	0.259713		950	29	1012.4	31.1	951.2	55.4	977.2	23.3		-2.7	-6.43398
24VG2A	68		66.5377	50.6363	1.31403		1.91475	0.109292	0.189602	0.00720495	0.0775127	0.00326812	0.184459	0.343528		1086.2	38.1	1119.2	39	1133.5	83.9	1101.9	29.3		2.3	1.26158
24VG2A	69		297.065	414.441	0.716783		4.09033	0.177382	0.30435	0.0101715	0.102336	0.00211234	0.474314	0.408008		1652.4	35.4	1712.8	50.3	1666.1	38.2	1663.5	33.5		-2.8	-2.80295
24VG2A	70		55.2001	213.292	0.258801		2.4645	0.115302	0.217251	0.0072385	0.0854886	0.00219051	0.370884	0.166978		1261.7	33.8	1267.3	38.3	1325.8	49.6	1263.9	29.5		2.7	4.41243
24VG2A	71		37.0873	59.6635	0.621608		2.53551	0.116896	0.222897	0.00730896	0.0849045	0.00237504	0.22311	0.327674		1282.3	33.6	1297.2	38.5	1312.5	54.3	1288.4	27.8		1.4	1.16571
24VG2A	72		611.424	270.389	2.26128		12.4673	0.614829	0.489998	0.0174215	0.186961	0.00540801	0.467441	0.192015		2640.3	46.4	2570.7	75.4	2714.9	47.7	2631.8	46.6		3.6	5.31143
24VG2A	73		79.0455	206.149	0.383439		4.47451	0.201484	0.302015	0.0107249	0.107365	0.00229392	0.509573	0.335874		1726.3	37.4	1701.3	53.1	1754.3	39.1	1721.7	36.8		1.3	3.02115
24VG2A	74		41.5858	449.371	0.0925421		0.62643	0.0350161	0.0762701	0.00297012	0.0594301	0.0028349	0.0763002	0.491742		493.9	21.9	473.8	17.8	581.9	103.6	481.5	14.4		3.3	18.5771
24VG2A	75		133.042	269.308	0.494016		0.56363	0.0261098	0.0714194	0.0023609	0.0568265	0.00163172	0.197612	0.30918		453.9	17	444.7	14.2	483.8	63.4	448.3	11.9		1.1	8.08185
24VG2A	76		176.639	295.94	0.596875		5.34261	0.250449	0.329859	0.0117169	0.114399	0.00313059	0.38169	0.349507		1875.7	40.1	1837.7	56.8	1869.6	49.4	1866.4	38.3		1.4	1.70625
24VG2A	77		47.1069	75.9943	0.619874		2.07628	0.0950011	0.192952	0.00662987	0.07431	0.00193919	0.265894	0.405304		1141	31.4	1137.3	35.8	1049	52.6	1139.5	26.5		-3.8	-8.41754
24VG2A	78		59.6123	132.459	0.450043		5.14091	0.248573	0.325515	0.0123095	0.107766	0.00294353	0.561267	0.226236		1842.9	41.1	1816.6	59.9	1761.2	49.9	1839.5	41		-4.2	-3.14558
24VG2A	79		102.476	236.721	0.432896		3.40055	0.145876	0.243202	0.0078254	0.0942201	0.00187632	0.386324	0.254098		1504.5	33.7	1403.3	40.6	1511.7	37.6	1465.8	31.7		3.4	7.17073
24VG2A	80		139.156	173.02	0.804276		3.14104	0.14838	0.222074	0.00772698	0.094332	0.00289419	0.275325	0.43844		1442.8	36.4	1292.8	40.8	1513.9	57.9	1372.7	32.5		5.8	14.6047
24VG2A	81		68.9719	134.419	0.513112		2.84009	0.13896	0.208864	0.007256	0.0895052	0.00272967	0.348186	0.33152		1366.2	36.7	1222.8	38.7	1414.1	58.3	1292.5	33		5.1	13.528
24VG2A	82		126.221	329.571	0.382985		2.194	0.0978932	0.173086	0.00586605	0.0832164	0.0019962	0.362033	0.311472		1179.1	31.1	1029.1	32.2	1273.4	46.8	1099.4	28		6.6	19.1849
24VG2A	83		40.6551	115.348	0.352456		3.53948	0.160455	0.240017	0.00807282	0.096084	0.00243226	0.297042	0.317719		1536.1	35.9	1386.8	42	1548.6	47.5	1471.3	32.9		4.7	10.4481
24VG2A	84		212.587	443.005	0.479875		1.93541	0.0989483	0.151579	0.00575396	0.0828999	0.00303459	0.282198	0.381951		1093.4	34.2	909.8	32.2	1266	71.5	981.4	28.6		10	28.1359
24VG2A	85		175.606	352.334	0.498407		3.98005	0.172076	0.254971	0.00834011	0.100818	0.00202511	0.453114	0.227338		1630.1	35.1	1464.1	42.8	1638.4	37.3	1566.9	35.2		5.4	10.6384
24VG2A	86		4.84559	192.293	0.0251989		1.91624	0.0956457	0.163822	0.00589222	0.0753518	0.00248143	0.359371	0.292561		1086.8	33.3	978	32.6	1077	66.1	1025.9	28.5		3.7	9.1922
24VG2A	87		57.308	83.093	0.689685		13.8609	0.598089	0.478137	0.0156007	0.185886	0.00382898	0.386778	0.309511		2740.2	40.9	2519.1	68	2705.4	34	2701.8	42.6		6.9	6.88623
24VG2A	88		111.668	189.34	0.589773		5.31264	0.222782	0.300682	0.00975039	0.113111	0.00214081	0.353218	0.399319		1870.9	35.8	1694.7	48.3	1849.2	34.2	1813.9	35.5		5.7	8.35496
24VG2A	89		256.701	257.667	0.996253		4.17479	0.188504	0.262041	0.0089622	0.103082	0.0023128	0.540849	0.0303146		1669.1	37	1500.3	45.8	1679.5	41.4	1611.2	38.7		5.7	10.6698
24VG2A	90		44.7886	54.6233	0.819954		1.69813	0.0827655	0.145535	0.00504186	0.0753743	0.00233755	0.315087	0.281816		1007.8	31.1	875.9	28.4	1077.6	62.3	926.1	25.4		5.6	18.7175
24VG2A	91		77.1181	88.3825	0.872549		2.09537	0.0960453	0.173707	0.00578394	0.0775447	0.00207366	0.250483	0.383004		1147.3	31.5	1032.5	31.8	1134.3	53.2	1086.3	26.2		3.9	8.9747
24VG2A	92		140.125	371.77	0.376914		3.50093	0.143242	0.241393	0.00774566	0.0940523	0.0016272	0.37705	0.408913		1527.4	32.3	1393.9	40.2	1508.3	32.7	1478.2	31.1		4.8	7.5847
24VG2A	93		135.835	176.525	0.769498		1.63635	0.073475	0.150232	0.00502036	0.0707127	0.00177593	0.289142	0.315172		984.3	28.3	902.3	28.1	948.2	51.4	940.6	23.4		3.5	4.84075
24VG2A	94		20.9546	22.9002	0.915039		2.53131	0.134259	0.195131	0.00715437	0.0847636	0.00332751	0.194241	0.403853		1281.1	38.6	1149.1	38.6	1309.3	76.2	1209.9	31.3		4.4	12.2355
24VG2A	95		654.835	604.741	1.08284		1.80425	0.0774037	0.160071	0.00523517	0.0737137	0.00146862	0.395768	0.303788		1047	28	957.2	29.1	1032.7	40.3	1001.6	24.9		3.5	7.31093
24VG2A	96		25.1761	63.8178	0.394499		5.86782	0.262552	0.327062	0.0110257	0.11804	0.0028776	0.358164	0.36696		1956.5	38.8	1824.1	53.6	1926	43.7	1917.6	38		4.5	5.29076
24VG2A	97		100.42	82.7468	1.21358		1.79596	0.0839502	0.159212	0.00548868	0.0742282	0.00195133	0.340419	0.300845		1044	30.5	952.4	30.5	1046.8	53	995.1	26		3.3	9.01796
24VG2A	98		54.184	139.119	0.38948		3.22937	0.166132	0.196526	0.00780012	0.109319	0.00266542	0.702914	0.0220791		1464.2	39.9	1156.6	42	1787.3	44.4	1219.6	51.1		23	35.2879
24VG2A	99		64.795	97.0639	0.66755		3.99362	0.177944	0.265999	0.00883708	0.100518	0.00249842	0.281289	0.378952		1632.9	36.2	1520.5	45	1632.9	46.2	1590.1	33.2		3.6	6.88346
24VG2A	100		171.92	334.847	0.513427		3.26632	0.138642	0.230558	0.00759161	0.0958696	0.00184616	0.425426	0.342585		1473.1	33	1337.4	39.8	1544.4	36.2	1420.6	32.1		5.4	13.4033
24VG2A	101		151.489	523.868	0.289174		1.78005	0.0771467	0.171873	0.00570502	0.0734769	0.00157912	0.40357	0.295971		1038.2	28.2	1022.4	31.4	1026.2	43.5	1031.6	25		0.92	0.370298
24VG2A	102		39.618	87.9467	0.450478		2.86162	0.128971	0.229983	0.00762118	0.087752	0.00221536	0.313264	0.305551		1371.9	33.9	1334.4	39.9	1376.2	48.5	1357.1	30		1.3	3.03735
24VG2A	103		93.7985	270.322	0.346988		3.2271	0.160348	0.244902	0.00856676	0.0919704	0.00255214	0.529214	0.0894983		1463.7	38.5	1412.1	44.4	1465.9	52.7	1444.4	36.8		1.8	3.6701
24VG2A	104		82.3906	214.06	0.384895		2.39255	0.120421	0.209408	0.00796577	0.0800209	0.00250358	0.380115	0.300283		1240.4	36	1225.7	42.5	1196.6	61.7	1234.9	32.3		-2	-2.43189		x
24VG2A	105		211.061	875.649	0.241034		4.99579	0.234176	0.299601	0.0106413	0.116141	0.00308591	0.440576	0.306027		1818.6	39.7	1689.3	52.8	1896.8	47.8	1780.7	39.6		5.1	10.9395
24VG2A	106		64.1764	204.408	0.313962		1.94177	0.105607	0.181325	0.00695379	0.0751786	0.00308665	0.270058	0.361161		1095.6	36.5	1074.2	37.9	1072.4	82.5	1085.4	29.9		-1.3	-0.167848
24VG2A	107		13.4248	56.0412	0.239552		5.15332	0.228983	0.32829	0.0111881	0.110283	0.00258111	0.374503	0.292202		1844.9	37.8	1830.1	54.3	1803.3	42.6	1841.5	35.9		-2.1	-1.48616		x
24VG2A	108		154.881	158.216	0.978922		1.92954	0.0910542	0.181892	0.00629413	0.0748886	0.00223367	0.289803	0.29666		1091.4	31.6	1077.3	34.3	1064.6	60	1085.1	26.5		-1.3	-1.19294
24VG2A	109		127.016	230.806	0.550317		3.43483	0.16116	0.259024	0.00934217	0.0920918	0.00247657	0.351754	0.422613		1512.4	36.9	1484.8	47.8	1468.4	51.1	1503.7	34		-2.3	-1.11686
24VG2A	110		66.5307	182.199	0.365155		1.68077	0.0928531	0.163735	0.00643471	0.0715762	0.00237443	0.523077	0.205899		1001.3	35.2	977.5	35.6	973	67.6	989.4	31.3		-1.5	-0.462487		x
24VG2A	111		125.084	272.66	0.458756		4.29163	0.179647	0.28969	0.00942865	0.105121	0.00178191	0.498866	0.270066		1691.8	34.5	1640	47.1	1715.6	31.2	1680.2	34		2	4.40662
24VG2A	112		113.037	180.155	0.627439		1.81483	0.0809225	0.174427	0.0058244	0.0741079	0.00154787	0.500806	0.168867		1050.8	29.2	1036.5	32	1043.5	42.1	1044.8	26.5		0.74	0.670819
24VG2A	113		112.769	376.224	0.299738		5.32318	0.225225	0.333392	0.0108771	0.114244	0.00221348	0.40619	0.3349		1872.6	36.2	1854.8	52.6	1867.2	35	1868.8	34.8		0.74	0.664096		x
24VG2A	114		37.1718	58.6598	0.633685		1.9921	0.0997541	0.18477	0.00656044	0.0785849	0.00268589	0.238427	0.292698		1112.8	33.9	1093	35.7	1160.8	67.8	1103.5	27.5		2.1	5.8408
24VG2A	115		78.553	180.159	0.436021		5.04591	0.207534	0.331703	0.0106609	0.109722	0.00175924	0.365289	0.4161		1827.1	34.9	1846.6	51.6	1794	29.2	1831.3	32.9		-1.5	-2.932
24VG2A	116		308.772	567.355	0.544229		3.3781	0.146353	0.26365	0.00912685	0.0934102	0.00183209	0.543827	0.345578		1499.3	33.9	1508.5	46.6	1495.4	37.1	1501	33		-0.4	-0.87602
24VG2A	117		221.013	405.665	0.544817		1.87172	0.0813699	0.183205	0.00616831	0.0748173	0.00157162	0.45314	0.335025		1071.1	28.8	1084.5	33.6	1062.7	42.3	1075.9	26.1		-0.64	-2.05138		x
24VG2A	118		156.876	289.128	0.542583		0.973751	0.0492005	0.110371	0.00382741	0.0646605	0.00206019	0.321317	0.242383		690.4	25.3	674.9	22.2	762.3	67.2	681.1	19.3		2.8	11.4653
24VG2A	119		53.8635	111.026	0.485144		4.35024	0.24712	0.299966	0.0128424	0.107836	0.00426613	0.301619	0.113351		1702.9	46.9	1691.1	63.7	1762.3	72.3	1699.5	42.8		2.6	4.04017
24VG2A	120		12.1613	14.6196	0.831849		1.97624	0.124886	0.19052	0.0075604	0.0782321	0.00431307	0.187573	0.360933		1107.4	42.6	1124.2	40.9	1151.9	109.4	1116.1	32		1.9	2.40472
24VG2A	121		125.346	468.187	0.267726		4.06388	0.199356	0.298029	0.0111735	0.101581	0.00273367	0.312706	0.416773		1647.1	40	1681.5	55.5	1652.4	49.9	1656.3	36.3		-1.3	-1.76107
24VG2A	122		348.503	381.941	0.912453		1.59069	0.0717179	0.164771	0.00565795	0.0721886	0.00176691	0.385414	0.297872		966.6	28.1	983.2	31.3	990.4	49.8	973.4	24.4		1.4	0.726979
24VG2A	123		303.626	263.248	1.15338		0.553535	0.0297011	0.074682	0.00279437	0.0557493	0.00225492	0.169283	0.360973		447.3	19.4	464.3	16.8	441.4	90	457.2	13.6		-1.1	-5.18804		x
24VG2A	124		59.719	84.8095	0.704155		1.86892	0.0945516	0.182394	0.00672311	0.0778361	0.00284028	0.250072	0.362719		1070.1	33.5	1080	36.7	1141.8	72.5	1074.5	27.5		3	5.41251
24VG2A	125		26.0767	67.9812	0.383587		2.29538	0.110292	0.216129	0.00769465	0.0807799	0.0029384	0.18878	0.394586		1210.9	34	1261.4	40.8	1215.2	71.5	1230	27.9		-2	-3.80184
24VG2A	126		76.1305	152.556	0.499032		1.65126	0.102295	0.161823	0.00739527	0.0720972	0.00360725	0.367157	0.321928		990	39.2	966.9	41	987.8	101.8	979.1	33.5		0.98	2.11581		x
24VG2A	127		61.6702	533.831	0.115524		12.3524	0.665394	0.492216	0.0194207	0.174813	0.00642976	0.415862	0.285087		2631.6	50.6	2580.3	83.9	2603.5	61.3	2624.5	50.3		2.4	0.891108		x
24VG2A	128		26.0225	51.3764	0.506506		1.78252	0.106669	0.169283	0.006677	0.0733743	0.00351545	0.332089	0.224662		1039.1	38.9	1008.2	36.8	1023.4	96.9	1022	31.3		1.2	1.48525
24VG2A	129		64.22	45.8464	1.40077		1.67378	0.0852005	0.163219	0.00567947	0.0709114	0.00250138	0.261701	0.361894		998.6	32.4	974.6	31.5	953.9	72.1	986	25.6		-2	-2.17004
24VG2A	130		113.29	155.719	0.727528		4.26973	0.20846	0.285136	0.0105635	0.102189	0.00315955	0.339683	0.329763		1687.5	40.2	1617.2	53	1663.4	57.2	1665.3	37.7		2.8	2.77744
24VG2A	131		134.012	149.91	0.893955		4.09421	0.209733	0.280017	0.0106342	0.0999645	0.00367588	0.233077	0.405755		1653.1	41.8	1591.4	53.6	1622.6	68.4	1631.1	37.2		2.5	1.92284
24VG2A	132		32.3062	88.0996	0.366701		3.1045	0.152968	0.240502	0.00793158	0.0879845	0.00266825	0.340573	0.166684		1433.8	37.8	1389.3	41.2	1381.3	58.3	1413.8	32.9		-2.6	-0.579165
24VG2A	133		89.4666	941.039	0.0950721		0.571254	0.0278808	0.06942	0.0025882	0.0563822	0.00179557	0.317753	0.384764		458.8	18	432.7	15.6	466.4	70.6	442.7	13.6		1.7	7.22556
24VG2A	134		134.851	172.861	0.78011		3.48308	0.177071	0.245759	0.00918335	0.0981554	0.00332021	0.369475	0.269834		1523.4	40.1	1416.6	47.5	1588.5	63.2	1480.5	37.4		4.4	10.8215
24VG2A	135		169.327	298.258	0.567722		0.584544	0.0276075	0.0736446	0.00255065	0.0554879	0.00164001	0.289865	0.298733		467.4	17.7	458.1	15.3	430.9	65.9	461.8	13.2		-1.6	-6.31237
24VG2A	136		76.1209	218.054	0.349093		4.97595	0.203607	0.314369	0.0102185	0.110675	0.00178496	0.368253	0.437517		1815.2	34.6	1762.2	50.1	1809.7	29.3	1802.5	33.3		2	2.62474
24VG2A	137		60.7432	141.173	0.430276		2.59803	0.122068	0.219855	0.00776985	0.0835621	0.00232263	0.370482	0.309206		1300.1	34.4	1281.1	41.1	1281.5	54.2	1293.1	31		1.2	0.0312134
24VG2A	138		123.38	303.032	0.407151		1.80358	0.087999	0.172906	0.00595109	0.0739581	0.00211149	0.408758	0.154991		1046.8	31.9	1028.1	32.7	1039.4	57.6	1037.7	27.3		0.79	1.08717
24VG2A	139		70.9986	115.344	0.615536		3.06477	0.132926	0.245977	0.0081385	0.0890156	0.00184352	0.421241	0.307171		1423.9	33.2	1417.7	42.1	1403.6	39.7	1422	30.9		-0.95	-1.00456
24VG2A	140		3.58731	392.764	0.00913351		0.780017	0.0347909	0.0936771	0.00312258	0.0602549	0.00140284	0.399755	0.278695		585.5	19.8	577.2	18.4	611.8	50.3	580.8	16		1	5.65544
24VG2A	141		59.4455	232.672	0.25549		5.20447	0.236294	0.329765	0.0105548	0.115065	0.00270245	0.418991	0.0630875		1853.3	38.7	1837.2	51.2	1880.1	42.3	1848.9	36.5		1.2	2.28179
24VG2A	142		282.307	190.191	1.48433		4.09624	0.175953	0.291626	0.00936359	0.102473	0.00205691	0.368685	0.276128		1653.6	35.1	1649.6	46.7	1668.6	37.1	1652.4	32.5		0.65	1.13868
24VG2A	143		34.8355	101.963	0.341649		3.42102	0.152648	0.259656	0.00904265	0.0966666	0.00237439	0.285058	0.483266		1509.2	35.1	1488.1	46.3	1559.9	46.1	1502.5	31.7		2.2	4.60286
24VG2A	144		135.222	230.973	0.585446		3.31003	0.146289	0.261209	0.00865328	0.0937099	0.002086	0.399817	0.302006		1483.4	34.5	1496	44.2	1501.4	42.1	1487.2	31.7		1	0.359664
24VG2A	145		298.917	149.18	2.00373		3.51087	0.160491	0.272902	0.00950789	0.0962427	0.00242052	0.394734	0.353185		1529.7	36.1	1555.5	48.2	1551.7	47.2	1536.6	33.4		-1.6	-0.244893		x
24VG2A	146		61.0438	117.183	0.520925		0.542939	0.0405566	0.0735583	0.00298204	0.055336	0.00345522	0.257132	0.196735		440.4	26.7	457.6	17.9	424.8	139.3	453.1	16.4		-0.95	-7.72128
24VG2A	147		14.9021	36.6132	0.407015		2.32339	0.131497	0.212737	0.0080419	0.0817809	0.00372864	0.1562	0.345599		1219.5	40.2	1243.4	42.7	1239.4	89.4	1230.4	31.2		-1.2	-0.322737
24VG2A	148		77.517	114.408	0.677547		1.70292	0.0789814	0.17123	0.00589586	0.075106	0.00196418	0.341961	0.329228		1009.6	29.7	1018.9	32.5	1070.4	52.5	1013.6	25.2		2.6	4.81129
24VG2A	149		484.644	656.845	0.737836		0.551612	0.0315457	0.0735414	0.00288619	0.0563994	0.00214972	0.51488	0.0563085		446.1	20.6	457.5	17.3	467.1	84.4	453.7	16.1		1	2.05523		x
24VG2A	150		48.7984	41.3846	1.17914		1.87383	0.0970855	0.182021	0.00657872	0.0779167	0.00291675	0.185021	0.411585		1071.9	34.3	1078	35.9	1143.9	74.4	1074.8	26.9		3	5.76099
24VG2A	151		82.6431	104.195	0.793155		2.52732	0.130521	0.220044	0.00813113	0.0863437	0.00264859	0.512129	0.149336		1279.9	37.6	1282.1	43	1345	59.2	1280.7	34.6		2.8	4.67658
24VG2A	152		62.2576	117.794	0.528531		2.75311	0.1225	0.24596	0.00794133	0.0863825	0.00210647	0.278615	0.314909		1342.9	33.1	1417.6	41.1	1345.9	47.1	1368.1	28.3		-2.9	-5.32729
24VG2A	153		48.9521	98.4071	0.497445		3.53946	0.154891	0.295599	0.00968287	0.0936263	0.0020071	0.329261	0.341777		1536.1	34.6	1669.4	48.2	1499.7	40.5	1568.7	30.7		-5	-11.3156
24VG2A	154		170.484	126.792	1.34459		0.749836	0.0362314	0.101865	0.00339572	0.0586866	0.00183961	0.0981283	0.359238		568.1	21	625.3	19.9	554.5	68.4	597.7	14.8		-3.4	-12.7683
24VG2A	155		84.7953	216.619	0.391449		1.8482	0.0947816	0.194512	0.00712332	0.0763871	0.00263328	0.328451	0.323499		1062.8	33.8	1145.8	38.4	1104.3	68.9	1094.4	28.3		-4.3	-3.75804
24VG2A	156		208.274	532.866	0.390857		4.3117	0.1764	0.331081	0.0104256	0.105261	0.00165497	0.425322	0.295235		1695.6	33.7	1843.6	50.5	1718.1	28.9	1719.5	31.2		-6.5	-7.30458
24VG2A	157		45.5416	87.4335	0.520871		2.04408	0.108724	0.209275	0.0077268	0.0783225	0.00302165	0.288966	0.302341		1130.3	36.3	1225	41.2	1154.2	76.6	1166.9	29.8		-4.1	-6.13412
24VG2A	158		122.861	191.307	0.642218		3.07054	0.166105	0.263937	0.0100804	0.093115	0.00362438	0.312632	0.293711		1425.4	41.4	1510	51.4	1489.4	73.7	1453	35.7		-4.5	-1.38311
24VG2A	159		90.2953	150.412	0.60032		2.09527	0.0896332	0.216707	0.00706749	0.0773596	0.00168337	0.241309	0.430219		1147.3	29.4	1264.5	37.4	1129.6	43.3	1184.9	24.7		-5.1	-11.9423
24VG2A	160		242.946	374.465	0.64878		1.92925	0.127665	0.191064	0.00824515	0.0800589	0.00403673	0.397219	0.22121		1091.3	44.3	1127.1	44.6	1197.6	99.4	1108.5	36.6		4.6	5.88677
24VG2A	161		117.892	148.187	0.795558		4.12056	0.179564	0.294042	0.0100381	0.110009	0.00248726	0.31	0.453377		1658.4	35.6	1661.7	50	1798.7	41.1	1659.3	32.8		6.3	7.61661
24VG2A	162		122.735	361.988	0.339058		1.59001	0.0761991	0.163672	0.00578046	0.0759948	0.00222609	0.360584	0.223536		966.3	29.9	977.2	32	1094	58.6	971.1	25.3		5.3	10.6764
24VG2A	163		16.618	23.6533	0.702563		1.72135	0.117073	0.17487	0.00722544	0.0768281	0.00444156	0.271195	0.255262		1016.5	43.7	1038.9	39.6	1115.8	115.4	1029	32.8		4	6.89192
24VG2B	1		68.6175	127.779	0.537001		1.50724	0.0579642	0.157127	0.00270744	0.0699034	0.0016771	0.216371	0.404198		933.3	23.5	940.8	15.1	924.6	49.3	939	13.8		-0.51	-1.75211		x
24VG2B	2		33.9181	84.6889	0.400503		1.57972	0.060505	0.159025	0.002459	0.0720222	0.00164596	0.175409	0.398094		962.3	23.8	951.4	13.7	985.6	46.5	953.5	12.7		1.2	3.46997		x
24VG2B	3		37.9453	136.135	0.278734		4.47264	0.16711	0.302163	0.00542985	0.107372	0.00220211	0.42085	0.424536		1725.9	31	1702	26.9	1754.5	37.5	1710.8	24.4		1.8	2.99231
24VG2B	4		30.5348	33.394	0.91438		1.65542	0.0722593	0.167572	0.00311505	0.0717992	0.00226446	0.238936	0.394518		991.6	27.6	998.7	17.2	979.3	64.2	997.1	16		-0.66	-1.98101
24VG2B	5		134.517	244.362	0.550483		3.25814	0.110024	0.254662	0.00307677	0.0926215	0.00115641	0.386078	0.436681		1471.1	26.2	1462.5	15.8	1479.3	23.7	1463.7	15.4		0.64	1.13567
24VG2B	6		158.273	218.471	0.724455		1.61281	0.056616	0.163035	0.00189784	0.0714618	0.0010532	0.384265	0.295254		975.2	22	973.6	10.5	969.7	30.1	973.7	10.5		-0.16	-0.402186
24VG2B	7		340.861	634.48	0.537229		4.52605	0.15223	0.309635	0.00358849	0.105635	0.00112021	0.557864	0.378451		1735.8	28	1738.9	17.7	1724.6	19.5	1738.7	17.6		-0.62	-0.829178
24VG2B	8		64.7785	164.518	0.393748		3.3083	0.11408	0.259112	0.0031061	0.0924907	0.00137122	0.346574	0.415228		1483	26.9	1485.3	15.9	1476.6	28.1	1484.9	15.4		-0.35	-0.589191		x
24VG2B	9		30.1589	37.1088	0.812717		1.74912	0.0873737	0.169532	0.00381475	0.0749162	0.00310978	0.149448	0.419069		1026.8	32.3	1009.5	21	1065.3	83.5	1014.1	18.8		1.9	5.23796
24VG2B	10		89.51	99.5635	0.899024		4.20413	0.148903	0.296335	0.00418782	0.101871	0.00155076	0.533322	0.404855		1674.8	29.1	1673.1	20.8	1657.7	28.2	1673.4	20.4		-0.7	-0.928998
24VG2B	11		240.625	311.003	0.773705		1.80047	0.0637384	0.177998	0.00252377	0.072928	0.00110082	0.450338	0.314833		1045.6	23.1	1056	13.8	1011	30.6	1054.9	13.6		-1.7	-4.45104
24VG2B	12		139.646	247.487	0.564256		2.92033	0.0991317	0.241076	0.00313757	0.0872216	0.00107914	0.412757	0.456519		1387.2	25.7	1392.3	16.3	1364.5	23.8	1391.5	15.8		-1.1	-2.03738
24VG2B	13		60.5169	116.728	0.518443		2.20358	0.0799266	0.201319	0.00286108	0.0790198	0.00138207	0.413058	0.298144		1182.2	25.3	1182.4	15.4	1171.7	34.6	1182.4	15		-0.44	-0.913203		x
24VG2B	14		199.154	339.461	0.586677		4.15209	0.149481	0.297322	0.00560234	0.0999469	0.00165167	0.508563	0.595648		1664.6	29.5	1678	27.8	1622.3	30.8	1672	24.7		-2	-3.4334		x
24VG2B	15		160.86	243.001	0.661974		2.45034	0.0855862	0.214243	0.00316908	0.0830758	0.00121175	0.470452	0.434074		1257.5	25.2	1251.4	16.8	1270.1	28.5	1252.4	16.5		0.71	1.47233
24VG2B	16		44.6729	180.569	0.2474		4.47992	0.152457	0.307731	0.00421985	0.105019	0.00140455	0.468616	0.536425		1727.3	28.2	1729.5	20.8	1713.8	24.6	1729	19.9		-0.66	-0.916093		x
24VG2B	17		99.3042	173.397	0.572698		4.16728	0.141777	0.29803	0.00376216	0.101022	0.0013416	0.42618	0.451831		1667.6	27.9	1681.5	18.7	1642.1	24.7	1678.8	18		-1.5	-2.39937
24VG2B	18		66.8736	148.21	0.451208		5.42544	0.243806	0.256737	0.00390848	0.151832	0.00424573	0.6168	-0.309611		1888.9	38.5	1473.1	20	2365.9	47.7	1398.9	19.6		46	37.7362
24VG2B	19		168.301	250.374	0.672199		0.642092	0.0252699	0.0801845	0.00118789	0.0578062	0.00137458	0.271297	0.303153		503.6	15.6	497.2	7.1	521.4	52.2	497.8	7		0.84	4.64135
24VG2B	20		26.5275	42.9219	0.61804		1.90425	0.0854803	0.182638	0.00355761	0.0755338	0.00241499	0.265683	0.286853		1082.6	29.9	1081.4	19.4	1081.8	64.1	1081.6	18		0.02	0.0369754		x
24VG2B	21		100.936	95.5326	1.05656		1.6575	0.0697916	0.167959	0.00322014	0.0713587	0.00195602	0.335851	0.277415		992.4	26.7	1000.9	17.8	966.8	56	999	16.7		-1.2	-3.5271
24VG2B	22		101.979	201.28	0.506652		1.78495	0.0802396	0.177168	0.00447117	0.0722384	0.00198568	0.517791	0.316046		1040	29.3	1051.5	24.5	991.7	55.9	1047.7	22.8		-2.1	-6.03005		x
24VG2B	23		16.0872	23.5409	0.683371		1.69493	0.0833634	0.165904	0.00329455	0.0741292	0.00300302	0.0670394	0.351651		1006.6	31.4	989.5	18.2	1044.1	81.7	993.5	16.3		1.9	5.22938
24VG2B	24		273.232	84.1857	3.24559		3.12418	0.115276	0.251219	0.00368737	0.0896055	0.0017363	0.288613	0.402314		1438.7	28.4	1444.8	19	1416.3	37	1443.3	17.6		-1.1	-2.01229
24VG2B	25		90.6938	523.165	0.173356		4.13309	0.144378	0.278095	0.00464507	0.107535	0.00132815	0.710533	0.405684		1660.9	28.6	1581.8	23.4	1757.2	22.6	1588.3	24.3		7.3	9.98179
24VG2B	26		45.0854	139.697	0.322736		2.94109	0.131421	0.200577	0.0045213	0.104841	0.00221531	0.705643	0.0314782		1392.6	33.9	1178.4	24.3	1710.7	38.9	1140.3	25.5		26	31.1159
24VG2B	27		37.9168	21.7515	1.74318		1.8352	0.0875007	0.180531	0.00380348	0.0740699	0.00294286	0.0505176	0.473148		1058.1	31.3	1069.9	20.8	1042.5	80.2	1066.4	17.6		-0.86	-2.6283
24VG2B	28		43.1461	88.6235	0.486847		3.79884	0.14195	0.28345	0.00475692	0.0968959	0.00171126	0.55323	0.271374		1592.5	30	1608.7	23.9	1564.4	33.1	1604.4	22.8		-1.6	-2.83176
24VG2B	29		10.2352	957.096	0.010694		2.88072	0.105783	0.239285	0.0045698	0.0869922	0.00154445	0.561493	0.464926		1376.9	27.7	1383	23.8	1359.5	34.2	1380.9	22.3		-0.85	-1.72858
24VG2B	30		131.962	219.454	0.601318		3.93993	0.145319	0.284224	0.00524291	0.0999682	0.00186689	0.488825	0.361055		1621.9	29.9	1612.6	26.3	1622.7	34.7	1616.1	24.1		0.26	0.622419
24VG2B	31		566.892	620.972	0.91291		4.15723	0.141848	0.296757	0.00389998	0.10107	0.0011969	0.634458	0.388611		1665.6	27.9	1675.2	19.4	1643	22	1674.5	19.3		-1.4	-1.95983
24VG2B	32		159.357	533.297	0.298814		1.80618	0.071004	0.178998	0.00445595	0.0720872	0.00143142	0.621244	0.45463		1047.7	25.7	1061.5	24.4	987.5	40.4	1055.4	22.3		-2.5	-7.49367
24VG2B	33		853.417	813.013	1.0497		1.00604	0.0766911	0.0696143	0.00117594	0.104077	0.00682663	0.332935	-0.147235		706.9	38.8	433.8	7.1	1697.2	120.9	424.7	7		53	74.4403
24VG2B	34		25.2274	95.7438	0.263489		0.522126	0.0238686	0.0704358	0.00123791	0.0536458	0.00197665	0.03212	0.387799		426.6	15.9	438.8	7.5	355.2	83.2	436.7	6.8		-2.8	-23.536
24VG2B	35		140.036	363.552	0.385188		4.13358	0.144569	0.29507	0.00400267	0.100875	0.00128391	0.60201	0.233256		1661	28.6	1666.8	19.9	1639.4	23.6	1666.2	19.7		-1.2	-1.67134
24VG2B	36		15.0102	39.2321	0.382601		2.78787	0.115034	0.233508	0.00380127	0.0866714	0.00244929	0.180766	0.365348		1352.3	30.8	1352.9	19.9	1352.3	54.5	1352.7	18		-0.014	-0.0443689
24VG2B	37		71.9836	147.65	0.487529		4.58612	0.171919	0.279322	0.00390841	0.118588	0.00221418	0.448477	0.191245		1746.7	31.2	1587.9	19.7	1934.3	33.4	1598.9	20.1		15	17.9083
24VG2B	38		8.99185	15.0544	0.59729		2.65988	0.148374	0.229704	0.00599468	0.0838286	0.00426762	0.0660123	0.442364		1317.4	41.2	1332.9	31.4	1287.7	99.1	1327.3	25.6		-1.5	-3.51013
24VG2B	39		60.5315	255.534	0.236882		1.97689	0.0697093	0.185935	0.00248983	0.0767618	0.00115512	0.422029	0.318115		1107.7	23.8	1099.3	13.5	1114.1	30	1100.1	13.4		0.54	1.32843
24VG2B	40		88.2978	85.1806	1.03659		3.90035	0.144364	0.28206	0.00403855	0.0995855	0.00177396	0.427267	0.242959		1613.8	29.9	1601.7	20.3	1615.5	33.2	1604	19.6		0.45	0.854225
24VG2B	41		50.0767	123.234	0.406356		2.12245	0.076785	0.196203	0.00263799	0.0782962	0.00138138	0.373789	0.311721		1156.1	25	1154.9	14.2	1153.5	35	1155	13.9		-0.07	-0.12137
24VG2B	42		410.374	784.126	0.523352		11.0116	0.398305	0.440484	0.00783275	0.180028	0.00250692	0.709951	0.312534		2524.1	33.7	2352.8	35.1	2652.4	23.1	2419.3	37.3		10	11.2954
24VG2B	43		157.019	669.357	0.234581		1.71858	0.0607863	0.171914	0.00263822	0.0721921	0.000861157	0.706117	0.254026		1015.5	22.7	1022.6	14.5	990.4	24.3	1023.2	14.4		-1.3	-3.25121		x
24VG2B	44		77.4265	251.011	0.308459		3.76448	0.134204	0.281573	0.00462727	0.0972698	0.001449	0.619345	0.294502		1585.2	28.6	1599.3	23.3	1571.6	27.9	1595.7	22.4		-0.97	-1.76253
24VG2B	45		72.737	375.597	0.193657		3.42215	0.118103	0.266219	0.0036359	0.0926334	0.0010897	0.652206	0.339017		1509.5	27.1	1521.6	18.5	1479.5	22.3	1521	18.4		-1.8	-2.84556
24VG2B	46		110.804	662.296	0.167303		1.66815	0.0567014	0.167673	0.00187602	0.0718217	0.000914269	0.383529	0.376233		996.5	21.6	999.3	10.4	980	25.9	999.1	10.3		-0.76	-1.96939
24VG2B	47		738.492	478.881	1.54212		3.89872	0.140708	0.276633	0.00353798	0.102154	0.00164019	0.541562	0.0208361		1613.4	29.2	1574.4	17.9	1662.8	29.7	1576	18		3.8	5.31633
24VG2B	48		302.647	529.658	0.5714		3.08808	0.108352	0.249199	0.00337788	0.0898254	0.00113614	0.553736	-0.0557603		1429.7	26.9	1434.3	17.4	1421	24.2	1433.9	17.3		-0.54	-0.935961
24VG2B	49		12.4339	16.0263	0.775848		1.85364	0.115541	0.180206	0.00544591	0.0750976	0.00410652	0.290898	0.292952		1064.7	41.1	1068.1	29.7	1070.2	109.9	1067.1	27.1		0.18	0.196225
24VG2B	50		104.981	352.795	0.29757		1.79103	0.0613581	0.175777	0.00205783	0.0736081	0.000971649	0.389227	0.310893		1042.2	22.3	1043.9	11.3	1029.8	26.7	1043.7	11.2		-0.56	-1.3692		x
24VG2B	51		167.091	343.822	0.485981		1.81018	0.0635452	0.174882	0.00211568	0.0748185	0.00112478	0.310117	0.389347		1049.1	23	1039	11.6	1062.7	30.2	1040	11.4		0.88	2.23017
24VG2B	52		70.7471	80.0647	0.883624		2.89578	0.105391	0.239309	0.00318668	0.0877548	0.00165285	0.226168	0.35523		1380.8	27.5	1383.1	16.6	1376.3	36.2	1382.6	15.4		-0.26	-0.494078
24VG2B	53		44.6396	129.27	0.34532		1.72595	0.0638745	0.170816	0.00246427	0.0731922	0.00147512	0.246188	0.37175		1018.2	23.8	1016.6	13.6	1018.4	40.8	1016.9	12.9		0.051	0.176748		x
24VG2B	54		41.891	119.943	0.349258		1.81076	0.0682607	0.178063	0.00239602	0.0736725	0.00150491	0.338837	0.24019		1049.4	24.7	1056.4	13.1	1031.6	41.3	1055.6	12.8		-0.94	-2.40403
24VG2B	55		41.9322	35.141	1.19325		0.835009	0.0572286	0.0994451	0.0027793	0.0612732	0.00418555	-0.079284	0.458429		616.4	31.7	611.2	16.3	647.9	146.7	612.3	14		1.3	5.66445		x
24VG2B	56		143.04	184.501	0.77528		2.81433	0.108582	0.23052	0.0040375	0.0882784	0.00220158	0.239762	0.484364		1359.4	28.9	1337.2	21.2	1387.7	47.9	1343.8	19		1.7	3.63912		x
24VG2B	57		50.1116	29.6573	1.68969		1.86781	0.0841543	0.177078	0.0036422	0.0769866	0.00281357	0.143402	0.433529		1069.8	29.8	1051	19.9	1120	72.9	1056.2	17.7		2.4	6.16071
24VG2B	58		31.7403	216.949	0.146303		2.14692	0.0867802	0.193887	0.00386429	0.0808345	0.00215479	0.375354	0.334261		1164.1	28	1142.4	20.9	1216.5	52.4	1148.2	19.5		2.6	6.09125
24VG2B	59		24.309	24.1368	1.00713		2.11765	0.105446	0.195119	0.00424776	0.0792821	0.00321491	0.182247	0.333581		1154.6	34.3	1149	22.9	1178.3	80.2	1150.5	20.6		1.1	2.48663
24VG2B	60		53.9339	150.164	0.359167		3.35167	0.115309	0.26255	0.00333759	0.0924579	0.00133369	0.318638	0.46135		1493.2	26.9	1502.9	17	1476	27.4	1500.9	16.1		-1	-1.82249
24VG2B	61		93.8651	148.528	0.63197		3.41527	0.119234	0.263628	0.00324189	0.093905	0.00142685	0.350669	0.355887		1507.9	27.4	1508.4	16.5	1505.4	28.7	1508.3	16		-0.13	-0.199283
24VG2B	62		103.344	196.946	0.524735		5.18174	0.211254	0.318007	0.00467561	0.117737	0.00266961	0.427461	-0.0577234		1849.6	34.7	1780	22.9	1921.4	40.7	1790	22.6		5.7	7.35922
24VG2B	63		277.908	300.84	0.923775		0.535581	0.0211303	0.069182	0.00101208	0.0563039	0.00142896	0.195907	0.378664		435.5	14	431.2	6.1	463.4	56.2	431.7	5.9		1.1	6.94864
24VG2B	64		15.1067	20.602	0.733261		0.826446	0.061646	0.0977545	0.00293722	0.0623019	0.0044105	0.145114	0.333992		611.6	34.3	601.2	17.2	683.5	151.2	602.9	16.3		3	12.041
24VG2B	65		34.0421	267.752	0.12714		2.03764	0.084427	0.157279	0.00205935	0.0937594	0.0021953	0.548205	-0.145656		1128.2	28.2	941.6	11.5	1502.4	44.2	921.6	11.3		25	37.3269
24VG2B	66		29.3565	98.8052	0.297115		4.59244	0.158742	0.313985	0.00405895	0.105978	0.00168718	0.19475	0.536605		1747.9	28.8	1760.3	19.9	1730.5	29.2	1756.7	17.7		-1.1	-1.72205
24VG2B	67		406.065	192.693	2.10732		1.73475	0.0649144	0.171132	0.00256832	0.0733111	0.00145319	0.247961	0.358369		1021.5	24.1	1018.3	14.1	1021.7	40.1	1018.9	13.4		0.095	0.332779
24VG2B	68		195.191	524.213	0.37235		9.50906	0.34164	0.382421	0.00713664	0.179844	0.00259473	0.686157	0.420512		2388.4	33	2087.6	33.3	2650.7	23.9	2132.4	39.4		24	21.2434
24VG2B	69		21.2653	34.0018	0.625417		1.63322	0.0754438	0.162035	0.00319681	0.0738534	0.00270674	0.163029	0.360492		983.1	29.1	968.1	17.7	1036.5	74	971.5	16.2		2.5	6.59913
24VG2B	70		184.62	226.908	0.813635		6.45998	0.234263	0.357635	0.00509315	0.130812	0.00176129	0.679085	0.006802		2040.5	31.9	1971	24.2	2108.1	23.6	1973.9	24.8		6.1	6.50349
24VG2B	71		37.1551	61.1523	0.607582		2.19419	0.0900089	0.199769	0.00343932	0.0799134	0.00206836	0.319233	0.289049		1179.2	28.6	1174.1	18.5	1194	51.1	1175.1	17.5		0.74	1.66667
24VG2B	72		99.2301	79.9584	1.24102		3.28513	0.12022	0.258076	0.00337271	0.0921498	0.00176444	0.222961	0.36738		1477.5	28.5	1480	17.3	1469.6	36.3	1479.5	16.1		-0.41	-0.707676
24VG2B	73		22.2551	28.7569	0.773906		12.1024	0.440004	0.496018	0.00779244	0.176571	0.00326847	0.383512	0.453086		2612.4	34.1	2596.7	33.6	2620.2	30.8	2604.2	28.3		0.69	0.896878
24VG2B	74		82.2073	402.547	0.204218		2.85276	0.116305	0.226483	0.00529034	0.0914921	0.00221425	0.488995	0.311153		1369.5	30.7	1316	27.8	1456	46	1336.1	25.8		4.6	9.61538
24VG2B	75		59.5895	154.394	0.385956		4.13114	0.162773	0.297071	0.00595659	0.100527	0.00213428	0.580264	0.236862		1660.5	32.2	1676.8	29.6	1633	39.4	1670.1	27.1		-1.5	-2.68218
24VG2B	76		37.7315	57.9643	0.650945		1.98006	0.0861252	0.184151	0.00335344	0.0785631	0.00256461	0.130217	0.40089		1108.7	29.3	1089.6	18.3	1160.3	64.7	1094.3	16.4		2.5	6.09325
24VG2B	77		214.094	503.467	0.425239		2.87356	0.098648	0.239416	0.00302472	0.0868574	0.00110379	0.514964	0.332787		1375	25.9	1383.7	15.7	1356.5	24.5	1383	15.6		-1.1	-2.00516		x
24VG2B	78		128.184	247.209	0.518523		2.8638	0.0977424	0.237535	0.00284185	0.0873742	0.00116145	0.3775	0.387566		1372.4	25.7	1373.9	14.8	1367.9	25.6	1373.7	14.5		-0.24	-0.438629
24VG2B	79		143.017	220.443	0.648771		2.19772	0.0771235	0.202402	0.00269353	0.0783766	0.00115319	0.414475	0.386353		1180.3	24.5	1188.2	14.4	1155.6	29.2	1187.2	14.2		-1.3	-2.82105
24VG2B	80		128.477	159.731	0.804334		5.06742	0.183241	0.325578	0.00444809	0.112744	0.00177198	0.46988	0.21421		1830.7	30.7	1816.9	21.6	1843.3	28.4	1819.6	21		1	1.43221
24VG2B	81		381.524	344.044	1.10894		3.86762	0.141599	0.281487	0.0047054	0.0989529	0.00139459	0.694799	0.238642		1607	29.5	1598.8	23.7	1603.6	26.3	1600.1	23.5		0.13	0.299327
24VG2B	82		24.1585	91.332	0.264513		2.15703	0.0939335	0.195584	0.00403023	0.0799745	0.00227502	0.404763	0.254475		1167.3	30.2	1151.6	21.7	1195.5	56.1	1155.3	20.7		1.5	3.6721
24VG2B	83		83.3913	240.538	0.346686		2.83424	0.096334	0.236687	0.0028359	0.0869619	0.00118227	0.368936	0.42695		1364.6	25.5	1369.5	14.8	1358.8	26.2	1368.8	14.4		-0.4	-0.78746
24VG2B	84		76.7563	191.383	0.401061		2.19881	0.0780932	0.200249	0.00267324	0.0794762	0.00125149	0.401477	0.32066		1180.7	24.8	1176.7	14.4	1183.1	31.1	1177.1	14.1		0.23	0.540952
24VG2B	85		46.3041	138.234	0.334968		2.62817	0.094051	0.224539	0.00284673	0.0847903	0.00140859	0.420087	0.276823		1308.6	26.3	1305.8	15	1309.9	32.2	1306.1	14.8		0.15	0.313001
24VG2B	86		27.7802	71.6442	0.387752		4.21897	0.16396	0.292145	0.0054492	0.104952	0.00263202	0.239673	0.474906		1677.7	31.9	1652.2	27.2	1712.6	46.1	1662.1	23.2		2	3.5268		x
24VG2B	87		40.907	70.294	0.581941		1.63937	0.0637544	0.163337	0.00259288	0.0731368	0.00183353	0.138491	0.430978		985.5	24.5	975.3	14.4	1016.8	50.8	977.5	13.1		1.5	4.08143		x
24VG2B	88		127.752	146.903	0.869634		17.7815	0.600661	0.590941	0.0083818	0.21834	0.00258707	0.602895	0.516418		2978	32.5	2993.2	34	2967.8	19.1	2984.6	29.4		-0.75	-0.855853
24VG2B	89		52.1552	82.833	0.629643		1.88997	0.0709717	0.182041	0.00270343	0.0751659	0.00161826	0.210821	0.390699		1077.6	24.9	1078.1	14.7	1072	43.2	1078	13.7		-0.24	-0.56903
24VG2B	90		44.0008	201.312	0.218571		1.73582	0.0635256	0.171614	0.00248691	0.0731217	0.00132585	0.365824	0.364618		1021.9	23.6	1021	13.7	1016.4	36.7	1021.1	13.3		-0.2	-0.452578		x
24VG2B	91		45.9026	78.8397	0.582227		2.4595	0.0932214	0.212971	0.003155	0.0836301	0.00170194	0.400981	0.269441		1260.2	27.4	1244.6	16.8	1283.1	39.6	1246.8	16.4		1.4	3.00055
24VG2B	92		45.7822	178.886	0.255929		4.86274	0.165461	0.323895	0.00397685	0.10904	0.00152151	0.321846	0.486426		1795.8	28.7	1808.7	19.4	1782.6	25.4	1805.6	18.1		-0.96	-1.46415
24VG2B	93		20.6351	63.0749	0.327152		2.2029	0.0850162	0.200324	0.00314013	0.079673	0.00193537	0.220886	0.43712		1182	27	1177.1	16.9	1188	48	1178.2	15.6		0.37	0.917508
24VG2B	94		195.744	364.446	0.537099		3.37406	0.121145	0.263478	0.00414785	0.0925347	0.00135338	0.622671	0.322799		1498.4	28.1	1507.6	21.2	1477.5	27.7	1506.1	20.8		-1.2	-2.03723		x
24VG2B	95		43.7611	50.3412	0.86929		4.18839	0.204063	0.295461	0.00767442	0.10291	0.00347444	0.481315	0.218527		1671.8	39.9	1668.8	38.2	1676.4	62.4	1670.1	33.6		0.25	0.453352
24VG2B	96		105.765	314.612	0.336176		2.18587	0.0768006	0.197695	0.00273932	0.079733	0.00118429	0.459717	0.390582		1176.6	24.5	1162.9	14.7	1189.5	29.3	1164.3	14.6		0.99	2.23623
24VG2B	97		44.0973	71.0729	0.620452		4.14528	0.179505	0.298985	0.00644367	0.100413	0.00283072	0.442489	0.301751		1663.3	35.4	1686.3	32	1630.9	52.4	1676.6	28.2		-1.8	-3.3969		x
24VG2B	98		268.58	295.988	0.9074		0.545465	0.0227032	0.0700617	0.00118646	0.0564513	0.00163266	0.189723	0.373206		442	14.9	436.5	7.1	469.2	64	437.2	6.9		1.1	6.96931		x
24VG2B	99		67.0449	157.036	0.426938		2.41615	0.0992593	0.212511	0.00424858	0.0816811	0.00211208	0.280801	0.284412		1247.4	29.5	1242.2	22.6	1237	50.7	1243.9	20.2		-0.36	-0.420372
24VG2B	100		132.123	325.896	0.405415		3.43329	0.126341	0.265303	0.00480536	0.0936049	0.00171067	0.583432	0.409952		1512	28.9	1516.9	24.5	1499.3	34.6	1515.4	23.2		-0.66	-1.17388
24VG2B	101		81.3354	86.3436	0.941998		3.28938	0.126655	0.258743	0.00396779	0.0916456	0.00201173	0.29956	0.318536		1478.5	30	1483.4	20.3	1459.2	41.7	1482.2	18.9		-0.96	-1.65844
24VG2B	102		410.666	655.693	0.626308		0.542889	0.0196557	0.0706954	0.000970921	0.0553838	0.000922731	0.41099	0.286815		440.3	12.9	440.3	5.8	426.8	37.2	440.3	5.8		-0.5	-3.16307		x
24VG2B	103		39.7482	95.6691	0.415476		2.91042	0.108435	0.24036	0.00336216	0.087598	0.00187776	0.203465	0.379823		1384.6	28.2	1388.6	17.5	1372.8	41.2	1387.7	16.1		-0.6	-1.15093
24VG2B	104		256.946	350.695	0.732676		3.86619	0.134398	0.281605	0.00406118	0.0993811	0.00122155	0.617144	0.316131		1606.7	28	1599.4	20.4	1611.7	22.9	1600.3	20.3		0.47	0.763169
24VG2B	105		111.904	1047.25	0.106855		8.73247	0.307083	0.396977	0.00655426	0.159087	0.00174001	0.814686	0.221286		2310.5	32	2155.1	30.2	2445.2	18.5	2152.5	35.4		14	11.8641
24VG2B	106		438.551	733.304	0.598048		0.541666	0.0201011	0.0701025	0.00111266	0.055841	0.00110019	0.345973	0.371322		439.5	13.2	436.8	6.7	445.1	43.8	437	6.6		0.27	1.86475
24VG2B	107		348.966	465.702	0.749333		0.910892	0.0340232	0.10696	0.00162517	0.0615377	0.00119717	0.382932	0.304072		657.5	18.1	655.1	9.5	657.1	41.7	655.3	9.4		0.062	0.304368
24VG2B	108		176.174	378.947	0.464904		3.31146	0.119309	0.255316	0.00490119	0.0935037	0.00173431	0.515796	0.503116		1483.8	28.1	1465.8	25.2	1497.3	35.1	1472.6	23.2		0.93	2.10379
24VG2B	109		132.76	263.798	0.503263		0.965409	0.0362909	0.112588	0.00159672	0.0617669	0.00113246	0.485568	0.12774		686.1	18.7	687.8	9.3	665.1	39.3	687.8	9.3		-0.86	-3.41302
24VG2B	110		143.053	279.639	0.511562		3.40346	0.120114	0.264186	0.00355957	0.0930355	0.00143296	0.413394	0.346638		1505.2	27.7	1511.2	18.2	1487.8	29.2	1510.1	17.5		-0.93	-1.57279
24VG2B	111		173.109	241.643	0.716385		3.24208	0.122783	0.252834	0.00552242	0.0917584	0.00226613	0.244082	0.646447		1467.3	29.4	1453.1	28.4	1461.5	46.9	1459.8	22.9		0.39	0.574752
24VG2B	112		41.732	81.1872	0.514022		1.86227	0.0884873	0.17945	0.00370897	0.0750527	0.00269272	0.228448	0.317853		1067.8	31.4	1064	20.3	1069	72.1	1064.9	18.7		0.15	0.467727
24VG2B	113		153.762	150.442	1.02207		0.712398	0.031749	0.0786717	0.00117072	0.0657149	0.00213761	0.130763	0.27808		546.2	18.8	488.2	7	796.4	68.2	492.7	6.8		11	38.6991
24VG2B	114		69.8066	221.928	0.314547		5.39314	0.182315	0.339509	0.00428435	0.114715	0.00142831	0.471106	0.406737		1883.8	29	1884.3	20.6	1874.6	22.4	1884.2	19.9		-0.43	-0.517444
24VG2B	115		86.1654	199.152	0.432662		3.20305	0.1121	0.256243	0.00329287	0.0903333	0.00139592	0.395499	0.338431		1457.9	27.1	1470.6	16.9	1431.7	29.5	1468.5	16.3		-1.5	-2.71705
24VG2B	116		21.5559	47.2983	0.455743		2.18874	0.0925889	0.200388	0.00344853	0.0785485	0.00222545	0.190262	0.390779		1177.5	29.5	1177.4	18.5	1159.9	56.2	1177.4	16.9		-0.72	-1.50875
24VG2B	117		60.1106	105.265	0.57104		1.63388	0.0623412	0.166576	0.00233299	0.0708484	0.00150036	0.297611	0.31923		983.4	24	993.2	12.9	952.1	43.3	991.9	12.5		-1.5	-4.31677		x
24VG2B	118		94.4732	99.2018	0.952334		3.47406	0.126427	0.271564	0.00380004	0.0926208	0.0017984	0.263451	0.392155		1521.3	28.7	1548.7	19.3	1479.3	36.8	1541.6	17.6		-2.5	-4.69141
24VG2B	119		34.0275	45.5189	0.747548		2.33001	0.100586	0.206061	0.00458112	0.0816733	0.00249802	0.215315	0.428584		1221.5	30.7	1207.8	24.5	1236.8	60	1212.7	21.1		0.88	2.34476		x
24VG2B	120		57.8241	115.112	0.502331		4.66005	0.163824	0.316363	0.00409206	0.10643	0.00163993	0.380039	0.340931		1760.1	29.4	1771.9	20	1738.3	28.2	1769.3	19		-1.3	-1.93292
24VG2B	121		5.56413	17.5005	0.317941		1.57843	0.0907007	0.155198	0.00418249	0.0746757	0.00371872	0.232723	0.371876		961.8	35.7	930	23.3	1058.9	100.2	937.5	21.6		4.6	12.173
24VG2B	122		60.8373	250.432	0.242929		1.2916	0.0618598	0.0861431	0.00268321	0.109839	0.00268175	0.737356	0.197674		842	27.4	532.7	15.9	1795.9	44.4	438.9	15		65	70.338
24VG2B	123		25.1193	103.403	0.242925		3.91864	0.137328	0.283496	0.00401226	0.0997152	0.00148594	0.439596	0.421144		1617.5	28.3	1608.9	20.2	1617.9	27.7	1610.8	19.3		0.28	0.556277
24VG2B	124		739.257	371.159	1.99175		0.819201	0.0296477	0.0986117	0.00130847	0.0602196	0.00113077	0.309728	0.353058		607.6	16.5	606.3	7.7	610.5	40.6	606.4	7.6		0.15	0.687961
24VG2B	125		20.7142	18.7038	1.10748		1.85675	0.119927	0.177427	0.00557558	0.0756474	0.00445021	0.209062	0.348719		1065.8	42.6	1052.9	30.5	1084.8	117.9	1056.7	27.2		1	2.94063
24VG2B	126		56.3558	157.629	0.357522		1.81448	0.0690126	0.177492	0.00247221	0.0738392	0.00151252	0.357972	0.215153		1050.7	24.9	1053.3	13.5	1036.2	41.4	1053	13.3		-0.67	-1.65026
24VG2B	127		34.9615	74.7481	0.467724		2.21725	0.0946802	0.200037	0.0039947	0.0807405	0.00248701	0.257369	0.372486		1186.5	29.9	1175.5	21.5	1214.2	60.6	1178.6	19.4		1.4	3.18728
24VG2B	128		109.526	160.779	0.681222		3.17162	0.135972	0.254159	0.00639527	0.0904827	0.00212137	0.635293	0.248592		1450.3	33.1	1459.9	32.9	1434.9	44.7	1455.1	29.6		-0.76	-1.74228
24VG2B	129		254.092	648.453	0.391843		2.67333	0.0931483	0.229526	0.00329277	0.0838445	0.00115013	0.521926	0.42134		1321.1	25.7	1332	17.3	1288.1	26.7	1330.5	16.9		-1.7	-3.40812
24VG2B	130		51.6907	131.473	0.393166		4.12972	0.162139	0.298603	0.00564384	0.100207	0.00243371	0.388803	0.35618		1660.2	32.1	1684.4	28	1627.1	45.2	1674.7	24.5		-1.9	-3.5216
24VG2B	131		117.754	163.547	0.720004		1.85364	0.0684631	0.180853	0.00238851	0.0745589	0.00143547	0.277003	0.291253		1064.7	24.4	1071.6	13	1055.7	38.8	1070.7	12.6		-0.57	-1.50611
24VG2B	132		181.762	259.703	0.699884		4.16284	0.154638	0.294887	0.00525335	0.10149	0.00181677	0.54306	0.36665		1666.7	30.4	1665.9	26.2	1650.7	33.2	1666.2	24.5		-0.69	-0.920821
24VG2B	133		59.7401	93.203	0.640968		4.19882	0.155782	0.299909	0.00452449	0.101655	0.00214997	0.263648	0.400759		1673.8	30.4	1690.9	22.4	1653.7	39.2	1685.6	20		-1.3	-2.2495
24VG2B	134		99.0909	106.989	0.926175		0.802169	0.0353513	0.0985517	0.00171561	0.0594213	0.001974	0.142329	0.367564		598.1	19.9	605.9	10.1	581.6	72.1	604.6	9.4		-0.79	-4.17813
24VG2B	135		20.5114	639.647	0.0320668		1.75957	0.0635878	0.175625	0.00216784	0.0726332	0.00138503	0.216931	0.409446		1030.7	23.4	1043	11.9	1002.8	38.7	1041.2	11.4		-1.5	-4.00878
24VG2B	136		692.347	693.749	0.99798		0.799134	0.0313797	0.0955688	0.0017169	0.060533	0.00148409	0.433119	0.384905		596.3	17.7	588.4	10.1	621.7	52.9	589.1	10		1.2	5.35628
24VG2B	137		465.71	764.422	0.609232		3.26697	0.112677	0.257212	0.00387741	0.0913381	0.00124322	0.556433	0.449987		1473.2	26.8	1475.6	19.9	1452.8	25.9	1475.1	19.4		-0.95	-1.56938
24VG2B	138		189.125	305.89	0.618278		4.09697	0.148092	0.294566	0.00437615	0.100626	0.00170995	0.467345	0.355703		1653.7	29.5	1664.3	21.8	1634.8	31.6	1661.8	20.7		-1.1	-1.8045
24VG2B	139		82.1449	124.639	0.659064		3.38007	0.117918	0.263195	0.00354305	0.0932073	0.00150125	0.272459	0.457134		1499.8	27.3	1506.2	18.1	1491.2	30.5	1504.6	16.7		-0.54	-1.0059
24VG2B	140		129.546	279.571	0.463375		2.82105	0.102522	0.236553	0.00375252	0.0863855	0.00142869	0.521803	0.304098		1361.1	27.2	1368.8	19.6	1345.9	31.9	1367.3	19		-0.86	-1.70146
24VG2B	141		52.5882	114.477	0.459378		3.96792	0.168605	0.284188	0.00566793	0.101525	0.00258901	0.394329	0.273934		1627.7	34.5	1612.4	28.5	1651.4	47.3	1617.6	25.9		1.4	2.36163
24VG2B	142		3.897	12.4924	0.311948		1.56024	0.110325	0.160897	0.00453794	0.0713825	0.00475032	0.0344983	0.393842		954.6	43.8	961.8	25.2	967.5	135.8	960	22.1		0.4	0.589147		x
24VG2B	143		12.0025	25.4355	0.471879		4.02319	0.178627	0.271861	0.00545378	0.10924	0.00371564	0.19256	0.381284		1638.9	36.1	1550.2	27.6	1786	62	1577.8	24.6		8.5	13.2027
24VG2B	144		254.352	477.726	0.532422		0.554794	0.0206087	0.0724183	0.00093886	0.0556678	0.00113394	0.250583	0.291188		448.1	13.5	450.7	5.6	438.2	45.3	450.5	5.6		-0.44	-2.85258
24VG2B	145		26.4333	43.4183	0.608805		14.6569	0.518758	0.538172	0.0089221	0.197524	0.00305126	0.544235	0.44001		2793.2	33.6	2775.8	37.4	2805.1	25.3	2786.4	31.3		0.81	1.04453
24VG2B	146		305.58	305.59	0.999966		4.14574	0.139816	0.296891	0.00353964	0.100716	0.00124488	0.200493	0.506622		1663.4	27.6	1675.9	17.6	1636.5	23	1672.8	16		-1.5	-2.40758
24VG2B	147		22.3981	657.823	0.0340487		3.85527	0.129085	0.281103	0.00318631	0.0989423	0.00109059	0.488449	0.385893		1604.4	27	1596.9	16	1603.4	20.6	1597.5	15.9		0.24	0.405389
24VG2B	148		42.1658	52.7268	0.799704		1.85927	0.0931151	0.174731	0.0032718	0.0775548	0.00317	0.137772	0.316425		1066.7	33.1	1038.1	18	1134.6	81.4	1043.4	16.7		3.5	8.5052
24VG2B	149		21.0207	78.6435	0.267291		4.083	0.163694	0.296593	0.00551746	0.0996417	0.00235617	0.449	0.317142		1650.9	32.7	1674.4	27.4	1616.6	44	1666	24.9		-2	-3.57541
24VG2B	150		52.7628	169.399	0.311471		1.6806	0.0609338	0.16766	0.00223512	0.0725254	0.00142192	0.219543	0.3889		1001.2	23.1	999.2	12.3	999.8	39.8	999.5	11.7		0.025	0.060012
24VG2B	151		65.8933	123.362	0.534147		1.82895	0.0701121	0.178492	0.00278973	0.074562	0.00171866	0.276975	0.365032		1055.9	25.2	1058.7	15.3	1055.8	46.4	1058.2	14.4		-0.083	-0.274673		x
24VG2B	152		71.2152	408.623	0.174281		4.14438	0.150138	0.297595	0.00477947	0.100475	0.00156216	0.570054	0.317671		1663.1	29.6	1679.4	23.7	1632.1	28.9	1675.1	22.7		-1.8	-2.89811
24VG2B	153		141.831	528.258	0.268487		12.4873	0.447694	0.500392	0.00912356	0.180556	0.00319794	0.476711	0.528009		2641.8	33.7	2615.5	39.2	2657.2	29.4	2632.1	31.3		1.1	1.56932		x
24VG2B	154		25.6408	19.3184	1.32727		12.0167	0.578886	0.464739	0.0136445	0.188064	0.00596194	0.530942	0.306683		2605.7	45.2	2460.4	60	2724.6	52.2	2568	46.9		6.7	9.69684
24VG2B	155		30.6414	80.8889	0.378808		3.87425	0.162206	0.264932	0.00459398	0.105555	0.00284351	0.302305	0.313004		1608.3	33.8	1515	23.4	1723.2	49.5	1535.6	22.3		7.7	12.0822
24VG2B	156		216.174	262.312	0.824107		1.7155	0.0618917	0.172199	0.00212452	0.0719449	0.00125274	0.335861	0.281096		1014.3	23.1	1024.2	11.7	983.5	35.5	1023.3	11.5		-1.6	-4.13828
24VG2B	157		117.564	124.583	0.943655		1.62236	0.0596062	0.166501	0.00238307	0.0709123	0.00152703	0.133127	0.441665		978.9	23.1	992.8	13.2	954	44	989.8	12		-1.3	-4.06709
24VG2B	158		160.352	185.704	0.863479		1.83779	0.0775335	0.181691	0.00322631	0.0729036	0.00171008	0.564967	-0.0516417		1059.1	27.7	1076.2	17.6	1010.4	47.6	1074.9	17.4		-2.6	-6.51227
24VG2B	159		219.09	609.94	0.359199		3.15538	0.118363	0.253319	0.00527171	0.0894337	0.00168869	0.41179	0.568118		1446.3	28.9	1455.6	27.1	1412.6	36.1	1451.4	23.4		-1.5	-3.04403
24VG2B	160		275.527	482.11	0.571504		0.881516	0.0326955	0.104043	0.00158838	0.0609838	0.00121398	0.280844	0.384802		641.8	17.6	638.1	9.3	637.7	42.8	638.5	9		-0.086	-0.0627254
24VG2B	161		47.4417	124.8	0.380143		3.52234	0.138962	0.272112	0.00433396	0.0940175	0.00235669	0.236975	0.380292		1532.2	31.2	1551.5	22	1507.6	47.4	1545.9	19.7		-1.5	-2.91191
24VG2B	162		291.862	630.424	0.462962		1.91422	0.0768601	0.186271	0.00334099	0.0743559	0.00156598	0.589487	0.134785		1086.1	26.8	1101.1	18.2	1050.2	42.4	1099.6	18		-1.9	-4.8467		x
24VG3	1		42.3917	110.389	0.384021		15.6117	0.689074	0.548558	0.0231643	0.207433	0.00510837	0.608814	0.515241		2853.3	42.1	2819.2	96.4	2884.9	40	2857.2	41.2		1.4	2.27738
24VG3	2		222.941	627.55	0.355256		0.554337	0.0249726	0.0716782	0.00279448	0.0561861	0.00134078	0.581038	0.153657		447.8	16.3	446.3	16.8	458.7	52.9	447.1	14.7		0.37	2.70329		x
24VG3	3		122.86	162.995	0.753769		4.51585	0.189826	0.315513	0.0120237	0.103823	0.00209582	0.481089	0.397809		1733.9	34.9	1767.8	58.9	1692.7	37.2	1736.7	34.4		-1.8	-4.4367		x
24VG3	4		89.6387	113.373	0.790651		4.13536	0.175795	0.294189	0.0112534	0.101897	0.00212168	0.47749	0.378254		1661.3	34.8	1662.4	56.1	1658.1	38.6	1661.4	34.3		-0.13	-0.259333
24VG3	5		57.1668	274.984	0.207892		3.39531	0.142417	0.261412	0.00990858	0.0945859	0.00192447	0.437411	0.387626		1503.3	32.9	1497.1	50.6	1519	38.4	1502.3	32.1		0.63	1.44174
24VG3	6		0.295192	102.05	0.00289262		1.73374	0.0765899	0.172912	0.00680444	0.0731766	0.00185115	0.369632	0.37083		1021.1	28.4	1028.1	37.4	1017.9	51.2	1023.2	26.2		-0.37	-1.00206		x
24VG3	7		133.212	506.905	0.262794		5.27178	0.274478	0.31855	0.0132856	0.120753	0.00420937	0.488111	0.107864		1864.3	44.4	1782.6	65	1966.6	62.2	1849.3	44.7		4.7	9.35625
24VG3	8		72.1725	136.773	0.527681		3.67816	0.153831	0.276334	0.0104872	0.0964484	0.00197186	0.424363	0.488574		1566.6	33.4	1572.9	53	1555.7	38.4	1567.6	32.5		-0.45	-1.10561
24VG3	9		90.6187	135.788	0.667353		1.61773	0.0893005	0.158806	0.00703142	0.0741463	0.00312247	0.290054	0.365566		977.1	34.6	950.1	39.1	1044.5	84.9	965.7	29.7		2.8	9.03782
24VG3	10		125.037	199.616	0.626389		3.63467	0.152672	0.271688	0.0102786	0.0969024	0.00199031	0.456125	0.42598		1557.2	33.4	1549.4	52.1	1564.5	38.5	1556	32.8		0.38	0.965165
24VG3	11		43.0164	56.6571	0.759241		3.387	0.152685	0.261371	0.0101498	0.0943168	0.0022807	0.472974	0.217324		1501.4	35.3	1496.9	51.9	1513.6	45.6	1500.6	34.4		0.49	1.10333		x
24VG3	12		136.005	883.787	0.153889		1.95778	0.0900449	0.152865	0.00645313	0.0935722	0.00204125	0.777891	0.226339		1101.1	30.9	917	36.1	1498.6	41.2	1042.3	38.1		17	38.8096
24VG3	13		92.5446	146.455	0.6319		2.9631	0.12638	0.240183	0.00921656	0.0894149	0.00196104	0.454193	0.441774		1398.2	32.4	1387.6	47.9	1412.2	42	1396.3	31.5		0.63	1.74196
24VG3	14		35.8188	86.9737	0.411835		2.96316	0.131366	0.239237	0.00934693	0.0900889	0.00226151	0.387125	0.384805		1398.2	33.7	1382.7	48.6	1426.6	47.9	1394.7	32.1		1.2	3.07725
24VG3	15		46.1574	139.423	0.331059		2.5173	0.11091	0.219586	0.00845408	0.0830463	0.00197027	0.433172	0.291571		1277	32	1279.7	44.7	1269.4	46.3	1277.6	30.5		-0.3	-0.811407		x
24VG3	16		285.402	855.879	0.333461		3.35601	0.147164	0.261799	0.0105682	0.0930769	0.00175674	0.825786	0.216308		1494.2	34.3	1499	54	1488.6	35.7	1492.5	32.5		-0.35	-0.698643
24VG3	17		76.9728	297.209	0.258986		2.14237	0.102405	0.195656	0.00829203	0.0793183	0.00206658	0.663021	0.234501		1162.6	33.1	1151.9	44.7	1179.2	51.5	1161.5	33.1		0.73	2.31513
24VG3	18		34.7451	81.7473	0.42503		3.79839	0.174363	0.276682	0.0109478	0.0998737	0.0028089	0.318338	0.350921		1592.4	36.9	1574.6	55.3	1620.9	52.3	1588.3	34.8		1.2	2.85644
24VG3	19		43.1794	91.3678	0.472589		1.80889	0.0879769	0.177258	0.00755551	0.0744066	0.00261261	0.246571	0.483739		1048.7	31.8	1052	41.4	1051.6	70.8	1049.8	28		-0.23	-0.0380373
24VG3	20		97.7662	276.178	0.353998		2.12003	0.0921044	0.19452	0.00762082	0.0788484	0.00165541	0.590775	0.298227		1155.3	30	1145.8	41.1	1167.4	41.6	1153.9	29.7		0.59	1.85027
24VG3	21		32.5308	93.158	0.3492		1.78028	0.0786629	0.174504	0.00671846	0.0744082	0.00184139	0.447785	0.32684		1038.3	28.7	1036.9	36.9	1051.6	49.9	1037.9	27		0.52	1.39787
24VG3	22		159.217	478.511	0.332734		4.63526	0.191662	0.314821	0.0118732	0.106717	0.00202054	0.536898	0.447473		1755.6	34.5	1764.4	58.2	1743.3	34.7	1756	34.4		-0.52	-1.21035
24VG3	23		47.587	140.624	0.338398		1.85248	0.0792491	0.177981	0.00674409	0.0756414	0.00170092	0.305088	0.379728		1064.3	28.2	1055.9	36.9	1084.7	45.1	1061.7	25.5		0.81	2.65511
24VG3	24		186.77	262.829	0.710613		3.27412	0.154122	0.258665	0.0111037	0.091683	0.00259671	0.55147	0.348832		1474.9	36.6	1483	56.9	1460	53.8	1475.6	36.3		-0.59	-1.57534
24VG3	25		55.3898	187.566	0.295307		1.57524	0.0713302	0.16075	0.0064275	0.0711818	0.00186869	0.439541	0.375412		960.5	28.1	960.9	35.7	961.7	53.6	960.6	26.2		0.064	0.083186		x
24VG3	26		79.9992	194.922	0.410416		2.13149	0.091748	0.197136	0.00755287	0.0786402	0.0018533	0.295296	0.445052		1159.1	29.7	1159.9	40.7	1162.2	46.7	1159.3	27.1		0.15	0.197901		x
24VG3	27		125.129	166.953	0.749488		11.016	0.517809	0.426142	0.0175663	0.187445	0.00521356	0.480321	0.287		2524.5	43.8	2288.3	79.4	2719.1	45.8	2507.4	46.2		9.7	15.8435
24VG3	28		180.605	414.995	0.435198		4.07119	0.179068	0.295191	0.0117337	0.099884	0.00237797	0.558663	0.331851		1648.6	35.9	1667.4	58.4	1621.1	44.3	1649.4	35.6		-1.1	-2.85609
24VG3	29		75.9025	148.482	0.511191		5.73207	0.266372	0.348404	0.014122	0.119557	0.00317146	0.591077	0.205758		1936.2	40.2	1927	67.5	1948.8	47.4	1936.2	40.3		0.53	1.11864
24VG3	30		28.9302	91.7814	0.315207		1.55588	0.081061	0.162343	0.00705986	0.0702374	0.00259377	0.411284	0.27549		952.8	32.2	969.8	39.2	934.4	75.8	958.5	29.1		-1	-3.78853
24VG3	31		46.4159	75.6974	0.613177		1.94679	0.0931656	0.186591	0.00746879	0.0756879	0.00234534	-0.0140745	0.0462356		1097.3	32.1	1102.9	40.6	1085.9	62.1	1099.5	25		-0.48	-1.56552		x
24VG3	32		46.8836	126.307	0.371189		1.71944	0.0742297	0.171888	0.00658033	0.0727551	0.00175975	0.282098	0.416284		1015.8	27.7	1022.5	36.2	1006.2	49.1	1018	24.7		-0.44	-1.61996		x
24VG3	33		106.531	94.9748	1.12168		3.39778	0.149176	0.264528	0.0103117	0.0935113	0.00236261	0.327116	0.445777		1503.9	34.4	1513	52.6	1497.4	47.8	1505.8	32.4		-0.4	-1.04181		x
24VG3	34		472.161	990.76	0.476564		3.73853	0.172544	0.275429	0.0115777	0.0984397	0.00247678	0.687961	0.360853		1579.7	37	1568.3	58.5	1593.9	47	1580.4	37		0.66	1.60612
24VG3	35		695.728	513.112	1.3559		2.70332	0.113573	0.230751	0.00882542	0.0853003	0.0016949	0.58156	0.390883		1329.4	31.1	1338.4	46.2	1321.5	38.5	1330.2	30.8		-0.49	-1.27885
24VG3	36		127.626	681.987	0.187139		2.06708	0.0947415	0.192971	0.0075009	0.0773221	0.00182097	0.375307	-0.0216586		1138	31.4	1137.4	40.5	1128.6	46.9	1137.8	28.8		-0.39	-0.779727
24VG3	37		85.4153	176.035	0.485218		4.02058	0.174906	0.289543	0.0115079	0.101106	0.00233398	0.533112	0.393562		1638.4	35.4	1639.2	57.5	1643.7	42.8	1638.4	35.2		0.26	0.273773
24VG3	38		50.0438	92.6753	0.53999		1.59431	0.0975448	0.163456	0.00759831	0.0708857	0.00345545	0.319323	0.277289		968	38.2	976	42.1	953.2	99.7	971.4	32.3		-0.63	-2.39194
24VG3	39		19.6281	39.8466	0.492592		2.14756	0.14223	0.163599	0.00761687	0.0964656	0.00524902	0.326338	0.265045		1164.3	45.9	976.7	42.2	1556	102.1	1044.5	38.7		19	37.2301
24VG3	40		398.747	4900.49	0.0813689		2.86664	0.140379	0.217286	0.010627	0.0952748	0.00233209	0.794846	0.542458		1373.2	36.9	1267.5	56.3	1532.7	46.1	1398.6	36.7		7.8	17.3028
24VG3	41		129.393	251.268	0.51496		3.70628	0.164519	0.27802	0.0107099	0.0966997	0.00231268	0.454968	0.249036		1572.7	35.5	1581.4	54	1560.6	44.9	1574.1	34.5		-0.53	-1.33282		x
24VG3	42		122.171	275.276	0.443814		4.18704	0.17871	0.298066	0.0113704	0.101615	0.00221942	0.434917	0.380736		1671.5	35	1681.7	56.5	1653	40.5	1672.9	34.2		-0.76	-1.73624
24VG3	43		153.461	544.634	0.28177		1.72119	0.0752277	0.170205	0.00658558	0.0734841	0.00158434	0.572575	0.220274		1016.5	28.1	1013.2	36.3	1026.4	43.6	1015.8	27.3		0.37	1.28605
24VG3	44		157.945	484.481	0.326009		1.9714	0.0846164	0.185466	0.00718577	0.077092	0.00170839	0.516556	0.274559		1105.8	28.9	1096.8	39.1	1122.7	44.2	1103.9	28.1		0.69	2.30694
24VG3	45		46.7128	161.425	0.289377		4.70437	0.198702	0.317357	0.0121041	0.107176	0.00221627	0.449765	0.411909		1768	35.4	1776.8	59.2	1751.1	37.8	1769	34.8		-0.69	-1.46765
24VG3	46		24.4946	74.7977	0.327478		1.50162	0.0749552	0.158937	0.00637124	0.0685238	0.00227234	0.335508	0.262865		931	30.4	950.9	35.4	883.5	68.6	938.6	26.4		-1.9	-7.62875		x
24VG3	47		96.7652	130.765	0.739995		2.1687	0.0970426	0.199216	0.00777829	0.0785699	0.00201561	0.29801	0.386348		1171.1	31.1	1171.1	41.8	1160.4	50.9	1171.1	28.2		-0.44	-0.922096
24VG3	48		31.5956	69.6341	0.453738		4.82456	0.226512	0.317888	0.0133996	0.109973	0.00319351	0.406111	0.440779		1789.2	39.5	1779.4	65.5	1798.1	52.9	1787.9	38.7		0.45	1.03999		x
24VG3	49		75.4458	265.573	0.284087		5.59147	0.267936	0.347066	0.013547	0.114717	0.00327452	0.00727212	0.416434		1914.8	41.3	1920.6	64.8	1874.6	51.5	1916.4	34.9		-1.8	-2.45386
24VG3	50		118.936	313.287	0.379638		5.88705	0.246787	0.356724	0.01367	0.119576	0.00232755	0.621299	0.361168		1959.3	36.4	1966.6	65	1949.1	34.8	1958.9	36.2		-0.42	-0.89785		x
24VG3	51		120.722	304.455	0.39652		2.09706	0.0874784	0.194304	0.00733221	0.0783821	0.00162081	0.36991	0.44882		1147.8	28.7	1144.6	39.6	1155.7	41	1147	26.8		0.31	0.960457
24VG3	52		190.334	481.723	0.395112		0.61547	0.037788	0.0670486	0.00351225	0.0665918	0.00298544	0.515406	0.354209		487	23.8	418.4	21.2	824.1	93.6	441.9	20.1		13	49.2295
24VG3	53		108.366	258.366	0.419427		2.49523	0.115177	0.219801	0.00879982	0.0818086	0.00201404	0.556691	0.209857		1270.6	33.5	1280.8	46.5	1240.1	48.3	1272.3	32.7		-1.2	-3.28199
24VG3	54		288.557	338.143	0.85336		0.536089	0.0255493	0.0699338	0.00278653	0.0557452	0.00166249	0.334431	0.26459		435.8	16.9	435.8	16.8	441.2	66.3	435.8	13.8		0.2	1.22393
24VG3	55		91.3348	481.666	0.189623		0.597758	0.0270291	0.070536	0.00277672	0.0611879	0.00156354	0.426363	0.36365		475.8	17.2	439.4	16.7	644.9	54.9	456.1	14.6		6.1	31.8654
24VG3	56		34.6395	118.781	0.291625		2.55847	0.165843	0.205393	0.00990046	0.0899404	0.003354	0.765832	-0.197617		1288.9	47.3	1204.2	52.9	1423.4	71.2	1260.4	50.6		6	15.3997
24VG3	57		244.326	890.724	0.274301		0.561121	0.0256975	0.0712684	0.00289876	0.0571838	0.00169895	0.222044	0.480955		452.3	16.7	443.8	17.4	497.6	65.5	448.2	13.4		1.6	10.8119
24VG3	58		56.5347	140.619	0.40204		1.69798	0.0788425	0.171827	0.00686823	0.0716865	0.0019867	0.353184	0.329275		1007.8	29.7	1022.2	37.8	976.2	56.5	1012.3	26.8		-1.3	-4.71215
24VG3	59		73.2066	147.092	0.497693		3.33829	0.144495	0.257871	0.00995284	0.0938887	0.00204717	0.511594	0.281702		1490.1	33.8	1478.9	51	1505	41.2	1488.6	33.4		0.66	1.73422
24VG3	60		285.967	472.356	0.605405		4.26408	0.177255	0.298821	0.0112048	0.103438	0.00198903	0.507438	0.331017		1686.5	34.2	1685.5	55.6	1685.9	35.5	1686.4	33.9		0.064	0.0237262
24VG3	61		94.3274	247.105	0.381729		2.07093	0.0908809	0.191914	0.00734675	0.0781885	0.00175679	0.47725	0.131109		1139.2	30	1131.7	39.7	1150.8	44.6	1137.4	28.7		0.51	1.65971		x
24VG3	62		62.0774	149.921	0.414067		2.03859	0.0915637	0.189027	0.00735723	0.0782305	0.00193238	0.485428	0.265802		1128.5	30.6	1116.1	39.9	1151.9	49	1125.3	29.3		0.96	3.10791
24VG3	63		21.6952	16.0823	1.34901		1.89138	0.116302	0.175562	0.00741868	0.080083	0.00429089	0.16051	0.277271		1078.1	40.8	1042.7	40.7	1198.1	105.7	1060	31.4		5.1	12.9705
24VG3	64		232.628	714.434	0.325611		2.23478	0.0961784	0.178476	0.00700823	0.090816	0.00200061	0.561692	0.443201		1192	30.2	1058.6	38.3	1441.9	42	1153.5	31.3		11	26.583
24VG3	65		150.917	364.082	0.414515		4.04168	0.186499	0.294793	0.0122591	0.099294	0.00265268	0.5465	0.422666		1642.6	37.6	1665.4	61	1610.1	49.8	1643.9	37.2		-1.4	-3.43457
24VG3	66		117.016	277.069	0.422337		0.539079	0.0256288	0.0700997	0.00274105	0.0558354	0.00166649	0.298004	0.275812		437.8	16.9	436.8	16.5	444.8	66.3	437.3	13.5		0.24	1.79856
24VG3	67		19.2596	19.2413	1.00095		2.02877	0.119738	0.169996	0.00719263	0.0878263	0.00414189	0.174878	0.31871		1125.2	40.1	1012.1	39.6	1377.8	90.7	1064.1	31.9		11	26.5423
24VG3	68		115.061	190.017	0.605529		0.556851	0.0263099	0.071058	0.0027636	0.0571893	0.00183023	0.100927	0.422918		449.5	17.2	442.5	16.6	497.8	70.5	445.9	12.6		1.7	11.1089
24VG3	69		36.8421	54.7206	0.673276		1.87903	0.101217	0.177424	0.00770927	0.0774631	0.00322947	0.216822	0.386121		1073.7	35.7	1052.9	42.2	1132.2	83	1065.4	30.2		2.4	7.00406
24VG3	70		252.043	499.305	0.504789		3.36457	0.144107	0.262788	0.0101012	0.092846	0.0018428	0.66678	0.236685		1496.2	33.5	1504.1	51.6	1483.9	37.6	1496	33.4		-0.51	-1.36128
24VG3	71		47.8226	65.0585	0.735071		1.90201	0.0884286	0.17086	0.00711953	0.0812899	0.00258647	0.192492	0.55135		1081.8	30.9	1016.8	39.2	1227.6	62.5	1057.7	27		6	17.1717
24VG3	72		22.8358	50.0948	0.455852		2.41993	0.109627	0.2145	0.00853817	0.0836385	0.00255075	0.207143	0.463733		1248.5	32.5	1252.7	45.3	1283.3	59.4	1249.8	28.8		1.5	2.38448
24VG3	73		99.4212	182.756	0.544009		3.37138	0.141691	0.261088	0.00995326	0.0937475	0.00182479	0.560258	0.367602		1497.8	32.9	1495.4	50.9	1502.2	36.8	1497.6	32.8		0.18	0.452669
24VG3	74		48.3832	146.42	0.330441		1.76728	0.0779635	0.17485	0.00667281	0.0733724	0.00178816	0.330408	0.315766		1033.5	28.6	1038.8	36.6	1023.3	49.3	1035.2	25.8		-0.42	-1.51471
24VG3	75		25.9946	95.9676	0.270869		2.35271	0.118569	0.199802	0.0083538	0.0852301	0.00260289	0.508152	0.234966		1228.4	35.9	1174.3	44.9	1319.9	59.2	1212.1	34.9		3.9	11.0311
24VG3	76		31.8259	58.8554	0.540748		1.67084	0.0802539	0.166439	0.00658417	0.0737664	0.00235222	0.274953	0.295006		997.5	30.5	992.5	36.4	1034.2	64.4	995.6	26.4		1.4	4.0321		x
24VG3	77		115.709	115.317	1.0034		3.93993	0.167326	0.28046	0.0107242	0.102516	0.00228358	0.394484	0.381703		1621.9	34.4	1593.7	54	1669.3	41.2	1617	33.5		2	4.52884
24VG3	78		117.541	153.164	0.767421		4.25752	0.180672	0.301887	0.0115539	0.102827	0.00229932	0.394083	0.479827		1685.2	34.9	1700.7	57.2	1674.9	41.3	1687.4	33.8		-0.66	-1.54039
24VG3	79		168.107	172.457	0.974777		3.40293	0.149752	0.251845	0.00982841	0.0983982	0.00237055	0.562438	0.228003		1505.1	34.5	1448	50.6	1593.1	45	1497.8	34.9		3.7	9.10803
24VG3	80		51.5185	195.889	0.262998		11.7146	0.499917	0.487738	0.0190306	0.17335	0.00348889	0.65642	0.371132		2581.9	39.9	2560.9	82.5	2589.5	33.6	2584.8	38.9		0.83	1.10446
24VG3	81		111.685	254.494	0.438853		2.38149	0.108455	0.209775	0.00835353	0.0822775	0.00224388	0.385786	0.391753		1237.1	32.6	1227.6	44.5	1251.2	53.4	1234.6	30.6		0.62	1.88619
24VG3	82		32.4889	49.4804	0.6566		3.55466	0.165713	0.256266	0.0101239	0.100265	0.00274711	0.43534	0.239156		1539.5	36.9	1470.7	52	1628.2	50.9	1523.2	36.3		4.1	9.67326
24VG3	83		273.922	375.908	0.728693		4.16957	0.173756	0.295402	0.0112053	0.101999	0.00192875	0.608201	0.392621		1668.1	34.1	1668.5	55.8	1660	35	1668.1	34.1		-0.35	-0.512048
24VG3	84		97.9408	188.895	0.518494		1.02053	0.0480028	0.0956464	0.00379023	0.0775667	0.0022015	0.311135	0.197456		714.2	24.1	588.8	22.3	1134.9	56.5	638.3	19.7		17	48.1188
24VG3	85		760.792	522.129	1.4571		0.813783	0.0417165	0.094219	0.00382026	0.0620176	0.00187967	0.460977	0.125424		604.6	23.4	580.4	22.5	673.8	64.8	591.4	19.8		2.7	13.8617
24VG3	86		111.653	379.48	0.294226		4.82411	0.207621	0.316261	0.0122815	0.110595	0.0024513	0.478929	0.250973		1789.1	36.2	1771.4	60.1	1808.4	40.3	1787.4	36		0.89	2.04601
24VG3	87		31.5751	33.1336	0.952965		1.80672	0.0940891	0.1767	0.00723474	0.0750319	0.00300086	0.0630365	0.413279		1047.9	34	1048.9	39.6	1068.5	80.4	1048.3	26.6		0.84	1.83435
24VG3	88		265.304	630.442	0.420822		3.42452	0.142558	0.262937	0.00993711	0.094033	0.0017715	0.599657	0.370011		1510	32.7	1504.9	50.7	1507.9	35.6	1509.8	32.7		0.35	0.198952
24VG3	89		91.4976	217.334	0.420999		5.79479	0.270793	0.352589	0.0142699	0.117326	0.00268153	0.701882	0.0334469		1945.6	40.5	1946.9	68	1915.1	41	1945.5	40		-1.4	-1.66049
24VG3	90		79.6827	239.778	0.332318		3.86641	0.165804	0.27669	0.0106629	0.100816	0.00220409	0.463322	0.359574		1606.7	34.6	1574.7	53.8	1638.4	40.6	1602	34.2		1.6	3.88794
24VG3	91		519.145	954.353	0.543976		1.83171	0.0898827	0.130577	0.0054259	0.100902	0.00261478	0.615799	0.00161151		1056.9	32.2	791.2	30.9	1639.9	48.1	845.9	33.9		31	51.7532
24VG3	92		86.0766	439.952	0.19565		4.22708	0.186157	0.294891	0.0115103	0.102661	0.00207709	0.690453	0.066521		1679.3	36.2	1665.9	57.3	1671.9	37.4	1680.2	36.2		1	0.358873
24VG3	93		409.772	701.77	0.583912		1.03599	0.0640334	0.0758514	0.00301916	0.0974381	0.00421302	0.514267	-0.174723		721.9	31.9	471.3	18.1	1574.8	80.9	458.3	18.6		46	70.0724
24VG3	94		131.047	255.253	0.513402		2.82207	0.119983	0.236829	0.00921294	0.085928	0.00178536	0.599256	0.364718		1361.4	31.9	1370.2	48	1335.7	40.2	1362	31.7		-0.96	-2.58292		x
24VG3	95		44.5159	104.743	0.425		2.69771	0.11923	0.226659	0.00881829	0.0856818	0.00217155	0.311347	0.421518		1327.8	32.7	1317	46.3	1330.1	49.1	1324.9	30.3		0.48	0.984888
24VG3	96		240.324	435.116	0.552322		3.2135	0.155596	0.238886	0.0104974	0.096837	0.00294831	0.528188	0.44817		1460.4	37.5	1380.9	54.6	1563.2	57.1	1447.6	38		4.7	11.662
24VG3	97		67.8531	212.084	0.319935		1.89565	0.0963983	0.177283	0.00784696	0.0775073	0.00313089	0.212584	0.545185		1079.6	33.8	1052.1	43	1133.4	80.4	1069.8	29.4		2.3	7.17311
24VG3	98		156.723	424.127	0.36952		4.8832	0.221703	0.309228	0.0126259	0.113376	0.0028976	0.559085	0.346911		1799.4	38.3	1736.9	62.2	1853.4	46.2	1795.8	38.8		2.9	6.28575
24VG3	99		112.467	136.324	0.824999		4.58955	0.197914	0.314659	0.0121962	0.104283	0.00227516	0.496984	0.392479		1747.4	36	1763.6	59.8	1700.9	40.2	1748.7	35.5		-1.9	-3.68628
24VG3	100		186.948	141.423	1.3219		1.88197	0.0955191	0.177678	0.00735568	0.0761091	0.00262683	0.36382	0.318071		1074.8	33.7	1054.3	40.3	1097	69.1	1067.2	30.3		1.2	3.89243
24VG3	101		46.41	83.8276	0.553636		1.86109	0.0904884	0.178232	0.00716419	0.0746228	0.00231179	0.364541	0.252996		1067.4	32.1	1057.3	39.2	1057.5	62.4	1063.9	29		0.71	0.0189125
24VG3	102		228.222	211.911	1.07697		3.87057	0.174889	0.278743	0.0110545	0.0997076	0.00247249	0.410027	0.353351		1607.6	36.5	1585	55.7	1617.8	46.2	1603.4	35.5		0.93	2.02744		x
24VG3	103		63.9619	107.399	0.595555		2.02025	0.0889143	0.191027	0.00740231	0.0761212	0.00182904	0.404567	0.336634		1122.3	29.9	1126.9	40.1	1097.4	48.1	1123.6	28		-0.97	-2.68817
24VG3	104		87.0839	194.141	0.448561		3.20139	0.137668	0.260518	0.00997157	0.0878511	0.00189663	0.518405	0.316249		1457.5	33.3	1492.5	51	1378.4	41.5	1461.4	32.5		-3.1	-8.27771
24VG3	105		30.0021	347	0.0864616		2.042	0.0960395	0.189083	0.00770947	0.0774835	0.00193319	0.566122	0.21989		1129.6	32.1	1116.4	41.8	1132.8	49.7	1126.7	31.3		0.73	1.44774
24VG3	106		83.8265	404.373	0.2073		1.80174	0.0756276	0.175908	0.00669253	0.0733245	0.00145598	0.552274	0.309182		1046.1	27.4	1044.6	36.7	1022	40.2	1045.8	26.7		-1	-2.21135
24VG3	107		85.0409	144.253	0.589526		3.70587	0.160805	0.272776	0.0107665	0.0975961	0.00230352	0.443586	0.453037		1572.6	34.7	1554.9	54.5	1577.8	44.2	1570	34.1		0.78	1.45139		x
24VG3	108		35.1758	223.87	0.157126		1.71965	0.0845445	0.170431	0.00740785	0.0724836	0.00221691	0.532964	0.351538		1015.9	31.6	1014.5	40.8	998.6	62.1	1015.6	30.4		-0.73	-1.59223
24VG3	109		13.509	24.8669	0.543251		1.85315	0.0987982	0.171224	0.00708705	0.0785184	0.00305327	0.307904	0.251317		1064.6	35.2	1018.9	39	1159.1	77.1	1044.5	30.4		4.1	12.0956
24VG3	110		48.0531	24.8453	1.93409		1.60541	0.0883761	0.160381	0.00662384	0.07267	0.00316175	0.179724	0.258516		972.3	34.4	958.9	36.8	1003.9	88.3	966.1	27.4		1.3	4.48252
24VG3	111		38.478	64.5176	0.596396		2.14795	0.0994586	0.195392	0.00768801	0.0791651	0.00225402	0.317017	0.350549		1164.4	32.1	1150.5	41.5	1175.4	56.3	1159.9	29.1		0.69	2.11843
24VG3	112		29.93	96.4337	0.310369		1.81095	0.0827115	0.175814	0.00685788	0.0739715	0.00212155	0.195149	0.421939		1049.4	29.9	1044.1	37.6	1039.8	57.9	1047.5	25.5		-0.52	-0.413541
24VG3	113		51.1336	119.777	0.426907		2.19388	0.0968128	0.202671	0.0078773	0.0782073	0.0019262	0.424603	0.306148		1179.1	30.8	1189.7	42.2	1151.2	48.9	1181.6	29.1		-1.1	-3.34434
24VG3	114		29.9765	83.7935	0.357742		4.17916	0.181047	0.292261	0.0112844	0.102851	0.00224772	0.479811	0.301814		1669.9	35.5	1652.8	56.3	1675.4	40.4	1667.8	35.2		0.73	1.34893
24VG3	115		0.669813	305.858	0.00218995		0.599502	0.0269368	0.0742826	0.00283068	0.0579721	0.00146339	0.352841	0.221819		476.9	17.1	461.9	17	527.7	55.3	469.3	14.1		1.9	12.4692
24VG3	116		77.0049	113.57	0.678038		3.59231	0.158051	0.27256	0.0105995	0.0948191	0.00217155	0.462766	0.289979		1547.8	34.9	1553.8	53.7	1523.6	43.2	1548.7	34.1		-0.97	-1.98215
24VG3	117		253.938	674.396	0.376541		3.43544	0.15041	0.266706	0.0108005	0.0927776	0.00212984	0.589354	0.446036		1512.5	34.4	1524.1	55	1482.5	43.5	1512.9	34.3		-1.1	-2.80607
24VG3	118		163.169	131.913	1.23695		5.00151	0.208989	0.326745	0.0125173	0.110531	0.002206	0.549235	0.477572		1819.6	35.4	1822.6	60.8	1807.3	36.3	1819.7	35.3		-0.5	-0.846567		x
24VG3	119		93.0661	168.506	0.5523		4.11284	0.180059	0.295486	0.0118587	0.100729	0.0022214	0.629446	0.372132		1656.9	35.8	1668.9	59	1636.7	40.9	1656.6	35.6		-0.8	-1.96737
24VG3	120		67.1426	134.197	0.500329		4.8188	0.202606	0.322608	0.0122291	0.108177	0.00222207	0.489106	0.349097		1788.2	35.4	1802.5	59.6	1768.1	37.5	1789.3	35		-0.85	-1.94559		x
24VG3	121		79.8315	85.2768	0.936147		4.80026	0.231146	0.317685	0.0137623	0.110584	0.00458046	0.0837845	0.314883		1784.9	40.5	1778.4	67.3	1808.2	75.3	1783.3	36		1	1.64805
24VG3	122		45.3467	131.681	0.344367		3.48745	0.156805	0.262733	0.010611	0.0962897	0.00247152	0.486365	0.326139		1524.4	35.5	1503.8	54.2	1552.6	48.2	1521.4	35.1		1.2	3.14311
24VG3	123		93.3789	164.012	0.569342		2.12312	0.0956549	0.198328	0.00766138	0.0774539	0.00181683	0.572905	-0.204772		1156.4	31.1	1166.3	41.2	1132	46.7	1158.3	30.2		-0.94	-3.03004		x
24VG3	124		220.267	218.672	1.00729		4.047	0.172267	0.29285	0.0114696	0.100175	0.00198838	0.662042	0.394943		1643.7	34.7	1655.8	57.2	1626.5	36.9	1643	34.5		-0.72	-1.80141
24VG3	125		20.2234	342.746	0.0590041		3.38201	0.146145	0.262621	0.010176	0.0933375	0.00204214	0.501407	0.322724		1500.2	33.9	1503.2	52	1493.9	41.4	1500.6	33.3		-0.25	-0.622532
24VG3	126		68.3753	95.2034	0.718202		1.5162	0.0719619	0.159493	0.00617771	0.0693002	0.00211741	0.267929	0.241443		936.9	29	954	34.3	906.8	62.9	943.5	24.8		-1.3	-5.20512		x
24VG3	127		34.214	93.7268	0.36504		4.00301	0.212229	0.291044	0.0126251	0.100082	0.00356221	0.531375	0.0578039		1634.8	43.1	1646.7	63	1624.8	66.2	1636.5	42.2		-0.55	-1.34786		x
24VG3	128		206.639	522.219	0.395694		2.1051	0.0889231	0.197375	0.00758857	0.0777207	0.00174187	0.316912	0.473415		1150.5	29.1	1161.2	40.9	1138.9	44.6	1153.3	26.8		-0.6	-1.95803		x
24VG3	129		31.2708	54.5504	0.573246		1.96783	0.0968153	0.189687	0.00752463	0.0760228	0.00263529	0.140216	0.378542		1104.6	33.1	1119.7	40.8	1094.8	69.4	1110.3	27.3		-0.7	-2.27439
24VG3	130		284.214	187.206	1.51819		4.76092	0.200432	0.318656	0.0120474	0.108937	0.00219541	0.518502	0.37713		1778	35.3	1783.2	58.9	1780.9	36.7	1778.4	35.1		-0.32	-0.129148
24VG3	131		116.332	94.9463	1.22524		4.05928	0.178173	0.293511	0.0114298	0.100441	0.00222534	0.614709	0.24402		1646.2	35.8	1659.1	57	1631.4	41.2	1646.3	35.6		-0.69	-1.69793
24VG3	132		105.976	107.273	0.987908		2.81547	0.159811	0.193261	0.00785143	0.106072	0.00431661	0.457184	0.0211701		1359.7	42.5	1139	42.4	1732.1	74.7	1223.2	40.7		20	34.2417
24VG3	133		72.2754	160.595	0.450048		2.30999	0.119553	0.188906	0.00868182	0.0891971	0.00333459	0.463501	0.490855		1215.4	36.7	1115.4	47.1	1407.5	71.6	1184.6	36.1		8.1	20.7531
24VG3	134		86.4139	162.927	0.530384		1.85775	0.0906092	0.178473	0.00739857	0.0754242	0.00233675	0.468141	0.325912		1066.2	32.2	1058.6	40.5	1078.9	62.2	1064	30.3		0.55	1.88155		x
24VG3	135		235.716	346.962	0.679373		1.85022	0.082226	0.180384	0.00706465	0.0743088	0.00182328	0.525535	0.356925		1063.5	29.3	1069.1	38.6	1049	49.5	1064.8	28.2		-0.56	-1.91611		x
24VG3	136		132.698	104.052	1.2753		1.55609	0.0809865	0.161343	0.00711459	0.0704501	0.0024406	0.481486	0.279648		952.9	32.2	964.2	39.5	940.6	71	956.4	29.9		-0.68	-2.50904
24VG3	137		176.995	153.312	1.15447		4.16919	0.181902	0.298014	0.0116837	0.101745	0.00228406	0.533259	0.336505		1668	35.7	1681.5	58	1655.4	41.6	1668.9	35.4		-0.65	-1.57666
24VG3	138		991.556	602.94	1.64454		3.4003	0.145502	0.259876	0.0100633	0.0949838	0.00199566	0.557176	0.336448		1504.5	33.6	1489.2	51.5	1526.9	39.6	1503.1	33.5		0.95	2.46905
24VG3	139		45.8458	156.675	0.292617		2.15715	0.0944296	0.19949	0.00764719	0.0783497	0.0019085	0.323669	0.357119		1167.4	30.4	1172.6	41.1	1154.9	48.3	1168.9	27.8		-0.5	-1.5326
24VG3	140		123.099	247.562	0.497247		1.55846	0.0688257	0.159098	0.00613613	0.0714719	0.00175186	0.365448	0.310022		953.9	27.3	951.8	34.1	970	50	953.2	24.8		0.62	1.87629
24VG3	141		119.659	144.483	0.828181		3.76913	0.162045	0.275358	0.0106203	0.0992732	0.00219117	0.459387	0.360665		1586.2	34.5	1567.9	53.7	1609.7	41.1	1583.5	34		1	2.59676
24VG3	142		64.5778	31.9646	2.02029		1.56265	0.088583	0.151034	0.00629996	0.0766917	0.00362654	0.175002	0.278871		955.5	35.1	906.8	35.3	1112.3	94.4	930.6	27.5		6.5	18.4752
24VG3	143		173.879	438.242	0.396765		2.21935	0.0949444	0.202497	0.00793642	0.0794738	0.00178042	0.458844	0.477014		1187.2	29.9	1188.7	42.5	1183.1	44.3	1187.5	28.9		-0.16	-0.473333
24VG3	144		200.931	99.6201	2.01697		1.72247	0.0785972	0.169989	0.00655027	0.0735813	0.00207655	0.183217	0.346372		1016.9	29.3	1012.1	36.1	1029.1	57.1	1015.1	24.7		0.49	1.65193
24VG3	145		880.375	709.36	1.24108		5.92713	0.26717	0.295589	0.0118574	0.144832	0.00316831	0.69154	0.113719		1965.2	39.2	1669.4	59	2285	37.6	1963.5	44.5		15	26.9409
24VG3	146		369.892	674.573	0.548336		1.86429	0.0803194	0.181409	0.00713146	0.0741775	0.00151146	0.641636	0.365133		1068.5	28.5	1074.7	38.9	1045.4	41.1	1069.2	28.2		-0.84	-2.80275
24VG3	147		205.99	177.173	1.16265		4.25385	0.179453	0.299677	0.011402	0.102609	0.00219551	0.36734	0.470052		1684.5	34.7	1689.7	56.6	1671	39.6	1685.3	33.5		-0.55	-1.11909
24VG3	148		19.9253	44.6133	0.446623		1.54308	0.0879852	0.158572	0.00667776	0.0717097	0.00336713	0.212424	0.27192		947.7	35.1	948.8	37.2	976.8	95.7	948.2	28.1		1.2	2.8665
24VG3	149		284.169	185.743	1.5299		3.6906	0.195577	0.259557	0.010852	0.102875	0.00345918	0.449793	0.0415468		1569.3	42.3	1487.6	55.5	1675.8	62.1	1545.8	41.4		5	11.2305
24VG3	150		84.8055	54.9711	1.54273		11.801	0.544164	0.488515	0.019612	0.173848	0.00409371	0.626453	0.123976		2588.7	43.2	2564.2	84.9	2594.3	39.3	2591.1	42.8		0.96	1.16024
24VG3	151		36.1802	78.5795	0.460428		3.5759	0.159256	0.273857	0.0106229	0.0939598	0.00230291	0.451664	0.311794		1544.2	35.3	1560.4	53.8	1506.5	46.3	1546.8	34.3		-1.5	-3.57783
24VG3	152		275.393	452.61	0.608456		4.17952	0.175655	0.298294	0.0114343	0.100865	0.00196148	0.617194	0.357486		1670	34.4	1682.8	56.8	1639.3	36.1	1669.9	34.3		-1.2	-2.65357
24VG3	153		40.131	94.9413	0.422692		3.31901	0.147103	0.259344	0.0103359	0.092752	0.00226995	0.509029	0.406046		1485.5	34.6	1486.5	52.9	1482	46.4	1485.7	34.1		-0.14	-0.303644
24VG3	154		31.9386	42.6478	0.748893		1.96476	0.0980113	0.185649	0.00733424	0.0760607	0.00256301	0.185813	0.310522		1103.5	33.6	1097.8	39.9	1095.8	67.5	1101.2	28		-0.44	-0.182515
24VG3	155		110.073	202.51	0.543543		1.8533	0.0805299	0.180112	0.00689017	0.0739567	0.00159316	0.362523	0.161078		1064.6	28.7	1067.6	37.6	1039.4	43.5	1065.5	26.3		-0.98	-2.7131		x
24VG3	156		107.645	161.198	0.667782		4.33503	0.181714	0.304522	0.0114763	0.102832	0.00210811	0.427953	0.371611		1700.1	34.6	1713.7	56.7	1675	37.9	1701.8	33.8		-1	-2.31045		x
24VG3	157		157.099	435.577	0.360668		2.13858	0.0901373	0.19785	0.00752516	0.0780091	0.00163395	0.427782	0.419949		1161.4	29.2	1163.8	40.5	1146.2	41.6	1161.9	27.7		-0.59	-1.53551
24VG3	158		40.4592	97.4985	0.414973		3.75139	0.168474	0.276314	0.0106045	0.0980379	0.00255359	0.299539	0.232096		1582.4	36	1572.8	53.6	1586.3	48.7	1580.1	33.6		0.37	0.851037
24VG3	159		73.8049	273.828	0.26953		0.564313	0.0269469	0.0715206	0.00283211	0.0569225	0.00173382	0.334612	0.276446		454.3	17.5	445.3	17	487.5	67.2	449.6	14.2		1.2	8.65641
24VG3	160		241.953	445.865	0.54266		2.09127	0.0869533	0.194633	0.00738437	0.0774685	0.00153941	0.462161	0.478751		1145.9	28.6	1146.4	39.8	1132.4	39.6	1146	27.4		-0.55	-1.23631
24VG3	161		63.4195	126.106	0.502907		1.99659	0.0891131	0.188246	0.007261	0.0764842	0.0019091	0.37988	0.30849		1114.4	30.2	1111.9	39.4	1106.9	49.9	1113.6	27.9		-0.37	-0.451712		x
24VG3	162		99.5825	283.467	0.351302		2.24571	0.0978083	0.204498	0.00801841	0.0793088	0.001748	0.564582	0.287195		1195.4	30.6	1199.4	42.9	1179	43.6	1196	30.1		-0.62	-1.73028
24VG3	163		50.3356	91.6696	0.549099		1.88858	0.0919978	0.178637	0.00706783	0.0758494	0.00238272	0.290063	0.314935		1077.1	32.3	1059.5	38.7	1090.2	62.9	1070.4	28.3		0.86	2.816
24VG4A	1		68.6175	127.779	0.537001		0.83962	0.033831	0.102561	0.0016701	0.0595577	0.00154054	0.276252	0.316562		618.9	18.7	629.4	9.8	586.6	56.1	628	9.4		-1.5	-7.29628
24VG4A	2		33.9181	84.6889	0.400503		1.15145	0.0543231	0.125378	0.00242416	0.0661766	0.00238241	0.14029	0.343882		777.9	25.6	761.4	13.9	811	75.3	764.5	12.9		1.7	6.11591
24VG4A	3		37.9453	136.135	0.278734		0.884164	0.0331242	0.104885	0.00157275	0.0611339	0.00135482	0.182525	0.425593		643.2	17.9	643	9.2	643	47.6	643	8.7		0.006	0		x
24VG4A	4		30.5348	33.394	0.91438		0.843939	0.029216	0.102384	0.00132606	0.0595893	0.000905282	0.35458	0.391782		621.3	16.1	628.4	7.8	587.7	32.9	627.9	7.7		-1.5	-6.9253
24VG4A	5		134.517	244.362	0.550483		0.836477	0.0308984	0.10159	0.00141994	0.0595683	0.0011563	0.313801	0.345655		617.2	17.1	623.7	8.3	586.9	42.1	623.1	8.2		-1.3	-6.27023		x
24VG4A	6		158.273	218.471	0.724455		0.802608	0.033403	0.0959138	0.00157377	0.0610106	0.00179028	0.125378	0.365794		598.3	18.8	590.4	9.3	638.7	63.1	591.7	8.7		1.7	7.56224
24VG4A	7		340.861	634.48	0.537229		0.866889	0.0337921	0.102669	0.00137556	0.0606518	0.00146683	-0.0448546	0.482094		633.9	18.4	630	8	625.9	52.1	630.7	7.2		-0.24	-0.655057
24VG4A	8		64.7785	164.518	0.393748		0.828253	0.0490181	0.0980205	0.00231758	0.0623345	0.00348969	0.0334501	0.418704		612.6	27.2	602.8	13.6	684.7	119.5	604.7	12.4		2.9	11.9614
24VG4A	9		30.1589	37.1088	0.812717		0.856254	0.0336161	0.101653	0.00163965	0.0607883	0.00139013	0.294914	0.334874		628.1	18.4	624.1	9.6	630.8	49.3	624.6	9.3		0.21	1.06214
24VG4A	10		89.51	99.5635	0.899024		0.841176	0.0366258	0.100985	0.00174657	0.0605941	0.00201583	0.0319864	0.393055		619.8	20.2	620.2	10.2	623.9	71.7	620.1	9.2		0.15	0.593044		x
24VG4A	11		240.625	311.003	0.773705		0.861637	0.0430063	0.100423	0.00201592	0.0623469	0.00259539	0.0892206	0.371094		631	23.5	616.9	11.8	685.1	88.9	619.4	10.9		2.3	9.95475
24VG4A	12		139.646	247.487	0.564256		0.824982	0.0332258	0.0983876	0.0015929	0.0602883	0.00140657	0.432345	0.194783		610.8	18.5	605	9.3	613	50.4	605.2	9.3		0.28	1.30506
24VG4A	13		60.5169	116.728	0.518443		1.30214	0.0512646	0.142393	0.00216896	0.0658685	0.00152304	0.269845	0.306581		846.7	22.6	858.2	12.2	801.3	48.4	856.5	11.8		-2.1	-7.10096
24VG4A	14		199.154	339.461	0.586677		0.809871	0.0284804	0.0972659	0.0014598	0.0597498	0.00101894	0.280182	0.5535		602.4	16	598.4	8.6	593.6	37	598.9	8.3		-0.25	-0.808625
24VG4A	15		160.86	243.001	0.661974		0.901371	0.036099	0.10616	0.00178001	0.0614017	0.00149544	0.19851	0.348986		652.5	19.3	650.4	10.4	652.4	52.3	650.8	9.8		0.056	0.30656
24VG4A	16		44.6729	180.569	0.2474		0.817526	0.0326934	0.0975791	0.00155833	0.0605725	0.00148627	0.303576	0.262469		606.7	18.3	600.2	9.2	623.1	52.9	600.9	9		0.8	3.67517
24VG4A	17		99.3042	173.397	0.572698		0.821876	0.0389611	0.098217	0.00193753	0.0609401	0.00222581	0.260454	0.230748		609.1	21.7	604	11.4	636.1	78.6	604.7	11		1.1	5.04638		x
24VG4A	18		66.8736	148.21	0.451208		1.16228	0.0584203	0.124922	0.00297457	0.067429	0.0027397	0.249704	0.344135		783	27.4	758.8	17	850.1	84.5	763.8	16		3.1	10.7399
24VG4A	19		168.301	250.374	0.672199		0.85267	0.0370885	0.101519	0.00165562	0.0606175	0.00193125	0.0810315	0.400024		626.1	20.3	623.3	9.7	624.7	68.7	623.8	9		0.055	0.224108
24VG4A	20		26.5275	42.9219	0.61804		0.846805	0.0315549	0.100643	0.00140323	0.0606895	0.00114463	0.397302	0.223468		622.9	17.3	618.2	8.2	627.3	40.7	618.4	8.2		0.33	1.45066		x
24VG4A	21		100.936	95.5326	1.05656		0.847149	0.0321959	0.100247	0.00132942	0.0607969	0.00130812	0.255593	0.314983		623.1	17.7	615.9	7.8	631.1	46.3	616.5	7.7		0.52	2.40849		x
24VG4A	22		101.979	201.28	0.506652		0.841061	0.0369832	0.100114	0.0015303	0.0606757	0.00190626	0.141097	0.281727		619.7	20.4	615.1	9	626.8	67.7	615.6	8.6		0.39	1.86662
24VG4A	23		16.0872	23.5409	0.683371		0.841213	0.0323014	0.101091	0.00137015	0.0602672	0.00140057	0.145978	0.354693		619.8	17.8	620.8	8	612.2	50.2	620.7	7.7		-0.31	-1.40477
24VG4A	24		273.232	84.1857	3.24559		0.84864	0.035053	0.0994269	0.00155607	0.0617427	0.00174087	0.18103	0.364131		623.9	19.3	611.1	9.1	664.3	60.4	612.7	8.8		1.9	8.00843
24VG4A	25		90.6938	523.165	0.173356		0.858245	0.0308568	0.102339	0.00148155	0.0603691	0.000988328	0.450741	0.324688		629.2	16.9	628.1	8.7	615.9	35.3	628.1	8.6		-0.47	-1.98084
24VG4A	26		45.0854	139.697	0.322736		0.867845	0.0383215	0.100861	0.00160241	0.0621807	0.00195595	0.170695	0.291316		634.4	20.8	619.5	9.4	679.4	67.2	621.2	9		2.1	8.8166
24VG4A	27		37.9168	21.7515	1.74318		1.93207	0.0702929	0.178048	0.0029455	0.0785052	0.0013036	0.553505	0.34686		1092.3	24.3	1056.3	16.1	1158.8	32.9	1059.2	16.2		4	8.84536
24VG4A	28		43.1461	88.6235	0.486847		0.859072	0.0326902	0.10144	0.00161136	0.0612622	0.00118984	0.476146	0.204532		629.6	17.9	622.8	9.4	647.5	41.7	623.1	9.4		0.91	3.81467
24VG4A	29		10.2352	957.096	0.010694		0.850402	0.0414136	0.0998727	0.00187658	0.0618871	0.00234049	0.179331	0.27357		624.9	22.7	613.7	11	669.2	80.9	615.2	10.5		2	8.29348
24VG4A	30		131.962	219.454	0.601318		0.827727	0.0351882	0.0990131	0.00168579	0.0607044	0.00187857	0.115304	0.367392		612.4	19.5	608.6	9.9	627.8	66.7	609.3	9.2		0.66	3.0583
24VG4A	31		566.892	620.972	0.91291		0.853429	0.0389013	0.100107	0.00190062	0.0622557	0.0021628	0.198262	0.301404		626.5	21.3	615	11.1	682	74.2	616.8	10.6		2.4	9.82405
24VG4A	32		159.357	533.297	0.298814		0.874114	0.0525178	0.100487	0.00290441	0.0632699	0.00349221	0.0643164	0.450946		637.8	28.5	617.3	17	716.4	117.2	622.3	15.1		3.3	13.8331
24VG4A	33		853.417	813.013	1.0497		0.847619	0.0375796	0.0993668	0.00170101	0.0623358	0.00214896	0.0903712	0.391438		623.3	20.7	610.7	10	684.7	73.6	612.8	9.3		2.6	10.8077
24VG4A	34		25.2274	95.7438	0.263489		0.81511	0.0429025	0.0966337	0.00206939	0.0615412	0.00271006	0.122486	0.335004		605.3	24	594.7	12.2	657.2	94.4	596.5	11.4		2.2	9.51004
24VG4A	35		140.036	363.552	0.385188		0.868178	0.0322885	0.103489	0.0016034	0.0609992	0.00127235	0.29302	0.388163		634.6	17.5	634.8	9.4	638.2	44.9	634.8	9.1		0.13	0.532748
24VG4A	36		15.0102	39.2321	0.382601		0.964299	0.0467397	0.109856	0.00212942	0.0641689	0.00245072	0.145409	0.30987		685.5	24.2	671.9	12.4	746.3	80.7	674.2	11.6		2.6	9.96918
24VG4A	37		71.9836	147.65	0.487529		0.850082	0.0372182	0.102795	0.00175681	0.0597036	0.00175993	0.235121	0.238004		624.7	20.4	630.8	10.3	591.9	63.9	630	9.9		-1.4	-6.57206
24VG4A	38		8.99185	15.0544	0.59729		0.82585	0.0315898	0.0979807	0.00142459	0.0612015	0.00143599	0.161026	0.405921		611.3	17.6	602.6	8.4	645.4	50.4	603.8	8		1.5	6.63155
24VG4A	39		60.5315	255.534	0.236882		0.933832	0.0472951	0.10747	0.00196278	0.0631768	0.00265337	0.0596227	0.350109		669.6	24.8	658	11.4	713.2	89.2	659.9	10.6		1.9	7.73976
24VG4A	40		88.2978	85.1806	1.03659		0.918359	0.0390197	0.109675	0.00187638	0.0615075	0.00194796	0.0949975	0.411374		661.5	20.7	670.9	10.9	656.1	67.9	669	10		-0.43	-2.25575
24VG4A	41		50.0767	123.234	0.406356		0.866491	0.0415565	0.100975	0.00178779	0.0625608	0.00233644	0.134628	0.292819		633.7	22.6	620.1	10.5	692.4	79.6	622	10		2.6	10.4419
24VG4A	42		410.374	784.126	0.523352		0.820814	0.0405584	0.0958415	0.00197987	0.0626816	0.00263527	0.0686382	0.425524		608.5	22.6	590	11.6	696.5	89.6	593.5	10.7		3.7	15.2907
24VG4A	43		157.019	669.357	0.234581		1.00896	0.038782	0.116978	0.00169587	0.0626913	0.0014009	0.278682	0.309977		708.3	19.6	713.1	9.8	696.8	47.6	712.6	9.5		-0.58	-2.33927
24VG4A	44		77.4265	251.011	0.308459		0.870704	0.0318286	0.10335	0.00149888	0.0614702	0.00102105	0.479958	0.257384		635.9	17.3	634	8.8	654.8	35.6	634	8.8		0.78	3.17654
24VG4A	45		72.737	375.597	0.193657		0.830902	0.033559	0.0981482	0.00160262	0.0617544	0.00163642	0.222232	0.368001		614.1	18.6	603.5	9.4	664.6	56.7	605	9.1		2.2	9.1935
24VG4A	46		110.804	662.296	0.167303		0.977589	0.0609162	0.110012	0.00269382	0.0656486	0.0039482	0.0460686	0.362685		692.4	31.3	672.8	15.6	794.3	126.1	676.4	14.3		4.3	15.2965
24VG4A	47		738.492	478.881	1.54212		1.15532	0.0423481	0.126725	0.00167126	0.0662943	0.00133437	0.125272	0.435804		779.8	20	769.2	9.6	814.7	42.1	770.8	9		1.6	5.58488		x
24VG4A	48		302.647	529.658	0.5714		0.85524	0.0323523	0.101309	0.00169942	0.0612197	0.00122639	0.449531	0.328149		627.5	17.7	622.1	9.9	646	43	622.5	9.9		0.87	3.69969
24VG4A	49		12.4339	16.0263	0.775848		0.831853	0.0300432	0.09975	0.0014453	0.0608189	0.00112178	0.364433	0.35682		614.6	16.7	612.9	8.5	631.9	39.7	613.1	8.4		0.7	3.0068
24VG4A	50		104.981	352.795	0.29757		0.8447	0.0310527	0.0998127	0.00172588	0.0611853	0.00126159	0.322481	0.500699		621.7	17.1	613.3	10.1	644.8	44.3	614.7	9.8		1.1	4.88524		x
24VG4A	51		167.091	343.822	0.485981		0.920709	0.0341887	0.107064	0.0014648	0.06263	0.00123188	0.30645	0.289627		662.7	18.1	655.7	8.5	694.7	41.9	656.3	8.4		1.4	5.61393
24VG4A	52		70.7471	80.0647	0.883624		0.848324	0.0356888	0.099528	0.00166751	0.062099	0.00184878	0.143485	0.390943		623.7	19.6	611.6	9.8	676.6	63.7	613.5	9.2		2.3	9.60686
24VG4A	53		44.6396	129.27	0.34532		0.862306	0.0297183	0.102478	0.00132188	0.0612533	0.000834383	0.453565	0.367832		631.4	16.2	628.9	7.7	647.2	29.2	628.9	7.7		0.69	2.82756		x
24VG4A	54		41.891	119.943	0.349258		0.952238	0.0440899	0.107777	0.00215982	0.0648206	0.00240788	0.113713	0.421811		679.3	22.9	659.8	12.6	767.6	78.2	663.7	11.6		3.8	14.0438
24VG4A	55		41.9322	35.141	1.19325		0.78815	0.0348267	0.0959835	0.00166703	0.0602712	0.00194276	0.249962	0.272668		590.1	19.8	590.8	9.8	612.3	69.7	590.7	9.5		0.82	3.51135		x
24VG4A	56		143.04	184.501	0.77528		0.869581	0.042653	0.103219	0.00191629	0.0612741	0.00232452	0.129816	0.296649		635.3	23.2	633.2	11.2	647.9	81.5	633.6	10.5		0.52	2.26887
24VG4A	57		50.1116	29.6573	1.68969		0.867798	0.0397722	0.100956	0.00272935	0.0628239	0.0020624	0.381238	0.349991		634.4	21.6	620	16	701.3	69.9	623.8	15		2.7	11.5928
24VG4A	58		31.7403	216.949	0.146303		0.869008	0.0367934	0.101234	0.00146511	0.0626874	0.00182335	0.179021	0.234781		635	20	621.6	8.6	696.7	62	623	8.3		2.7	10.7794
24VG4A	59		24.309	24.1368	1.00713		0.915029	0.0379499	0.105886	0.00177651	0.0632129	0.00177223	0.192685	0.318687		659.7	20.1	648.8	10.4	714.4	59.6	650.5	9.9		2.3	9.18253
24VG4A	60		53.9339	150.164	0.359167		0.862357	0.0332438	0.102226	0.0015276	0.0615353	0.00146177	0.133242	0.450012		631.4	18.1	627.4	8.9	657	51	628.1	8.4		1.1	4.50533
24VG4A	61		93.8651	148.528	0.63197		0.849937	0.0338217	0.101265	0.00172162	0.0619133	0.00177055	0.10573	0.44591		624.6	18.6	621.8	10.1	670.1	61.2	622.4	9.2		1.8	7.20788		x
24VG4A	62		103.344	196.946	0.524735		0.903325	0.0359699	0.105784	0.00177813	0.0624588	0.00163734	0.171831	0.417465		653.5	19.2	648.2	10.4	688.9	55.9	649.2	9.7		1.5	5.90797
24VG4A	63		277.908	300.84	0.923775		0.821636	0.040785	0.0983107	0.00209268	0.0614461	0.00245278	0.197021	0.335851		609	22.7	604.5	12.3	653.9	85.7	605.3	11.6		1.8	7.55467
24VG4A	64		15.1067	20.602	0.733261		0.839538	0.0469743	0.0999404	0.00237594	0.0619951	0.00315775	0.0237369	0.412043		618.9	25.9	614.1	13.9	673	109	615.1	12.4		2.1	8.75186
24VG4A	65		34.0421	267.752	0.12714		0.959877	0.0435267	0.109129	0.00190207	0.0639802	0.00216639	0.156879	0.343948		683.2	22.6	667.7	11.1	740	71.6	670	10.5		2.6	9.77027
24VG4A	66		29.3565	98.8052	0.297115		0.841365	0.030086	0.0994381	0.00136906	0.0614073	0.00102766	0.451487	0.284024		619.9	16.6	611.1	8	652.6	35.9	611.3	8		1.6	6.35918
24VG4A	67		406.065	192.693	2.10732		0.853379	0.0321223	0.101088	0.00139662	0.0612008	0.0013705	0.181293	0.394562		626.5	17.6	620.8	8.2	645.3	48.1	621.5	7.9		0.86	3.79668
24VG4A	68		195.191	524.213	0.37235		0.861496	0.0401907	0.103671	0.00182947	0.0604315	0.00216124	0.101279	0.324823		630.9	21.9	635.9	10.7	618.1	77.2	635.1	10		-0.59	-2.87979
24VG4A	69		21.2653	34.0018	0.625417		19.3939	0.663758	0.603752	0.00751461	0.232573	0.00244547	0.672897	0.194164		3061.6	33	3044.9	30.2	3069.1	16.8	3050.7	29.1		0.86	0.788505		x
24VG4A	70		184.62	226.908	0.813635		0.850407	0.0322233	0.0997699	0.00149634	0.0621068	0.00138409	0.230617	0.406527		624.9	17.7	613.1	8.8	676.8	47.6	614.6	8.5		2.3	9.41194
24VG4A	71		37.1551	61.1523	0.607582		0.848191	0.0321057	0.101192	0.00150775	0.0608984	0.00137332	0.203353	0.369657		623.7	17.6	621.4	8.8	634.7	48.5	621.7	8.5		0.47	2.09548
24VG4A	72		99.2301	79.9584	1.24102		0.863299	0.0362525	0.102431	0.00164154	0.0613743	0.0018311	0.163595	0.372819		631.9	19.8	628.6	9.6	651.4	64	629.1	9.1		0.82	3.50015
24VG4A	73		22.2551	28.7569	0.773906		0.855595	0.0315252	0.101051	0.00138276	0.0612066	0.00111172	0.35189	0.278343		627.7	17.3	620.6	8.1	645.6	39	621	8		0.9	3.87237
24VG4A	74		82.2073	402.547	0.204218		0.871224	0.0373524	0.100397	0.00222794	0.0630148	0.00200419	0.246829	0.449273		636.2	20.3	616.7	13.1	707.8	67.6	621.2	12.1		3	12.8709
24VG4A	75		59.5895	154.394	0.385956		14.4565	0.527879	0.535335	0.00895197	0.195572	0.00349131	0.479552	0.39272		2780.1	34.7	2763.9	37.6	2788.9	29.2	2773.2	31.2		0.68	0.896411		x
24VG4A	76		37.7315	57.9643	0.650945		0.905209	0.0367492	0.108569	0.00186386	0.0605088	0.00148198	0.362421	0.228015		654.5	19.6	664.4	10.8	620.9	52.8	663.2	10.6		-1.5	-7.00596
24VG4A	77		214.094	503.467	0.425239		1.32834	0.0500927	0.143694	0.00266665	0.0671846	0.00126231	0.526898	0.34365		858.2	21.8	865.5	15	842.6	39.1	864.4	14.7		-0.81	-2.71778		x
24VG4A	78		128.184	247.209	0.518523		0.914247	0.0507841	0.105613	0.00254685	0.0646491	0.00331545	0.0343137	0.427994		659.3	26.9	647.2	14.9	762	108.1	649.9	13.2		4.1	15.0656
24VG4A	79		143.017	220.443	0.648771		1.05739	0.0497434	0.119818	0.00288886	0.0643819	0.0022287	0.334359	0.342815		732.5	24.5	729.5	16.6	753.3	73.1	730.2	15.6		0.85	3.15943		x
24VG4A	80		128.477	159.731	0.804334		0.849925	0.0342142	0.101863	0.00179016	0.0607291	0.00159265	0.294892	0.355279		624.6	18.8	625.3	10.5	628.7	56.5	625.2	10.1		0.14	0.540798
24VG4A	81		381.524	344.044	1.10894		0.890261	0.0449499	0.102943	0.00209547	0.0625222	0.00248461	0.0927747	0.344671		646.5	24.1	631.6	12.2	691.1	84.8	634.3	11.3		2	8.60946		x
24VG4A	82		24.1585	91.332	0.264513		0.846847	0.0364363	0.103254	0.00202019	0.0600222	0.00186845	0.185999	0.385338		622.9	20	633.5	11.8	603.4	67.3	631.2	10.9		-0.94	-4.9884
24VG4A	83		83.3913	240.538	0.346686		0.867756	0.0408327	0.104633	0.00214044	0.0604524	0.00216722	0.243563	0.300769		634.3	22.2	641.5	12.5	618.8	77.4	640.3	11.8		-0.74	-3.66839
24VG4A	84		76.7563	191.383	0.401061		0.867155	0.0342394	0.102492	0.00190477	0.0615085	0.00149396	0.359968	0.377158		634	18.6	629	11.1	656.1	52.1	629.8	10.8		0.95	4.13047
24VG4A	85		46.3041	138.234	0.334968		1.20269	0.0459756	0.131028	0.00227081	0.0666046	0.00148752	0.341569	0.408474		801.8	21.2	793.7	12.9	824.5	46.6	795.1	12.5		1.1	3.7356
24VG4A	86		27.7802	71.6442	0.387752		0.870856	0.0345881	0.104641	0.00179597	0.0600918	0.00149338	0.235368	0.403035		636	18.8	641.5	10.5	605.9	53.7	640.6	9.9		-1.3	-5.87556
24VG4A	87		40.907	70.294	0.581941		1.34879	0.0519751	0.142651	0.00311664	0.0685994	0.00131999	0.619186	0.372481		867	22.5	859.6	17.6	885.8	39.8	861.1	17.3		0.91	2.95778		x
24VG4A	88		127.752	146.903	0.869634		0.855146	0.0457779	0.0997579	0.00229766	0.0615007	0.00259019	0.270718	0.245637		627.5	25.1	613	13.5	655.8	90.3	615	13		1.4	6.52638		x
24VG4A	89		52.1552	82.833	0.629643		0.85431	0.0351717	0.100972	0.00180846	0.061302	0.00175747	0.234541	0.400853		627	19.3	620.1	10.6	648.9	61.6	621.2	10.1		0.98	4.43828
24VG4A	90		44.0008	201.312	0.218571		0.816652	0.0375903	0.0988931	0.00179742	0.0600701	0.00217845	0.0652774	0.350787		606.2	21	607.9	10.5	605.1	78.4	607.6	9.7		-0.081	-0.462733		x
24VG4A	91		45.9026	78.8397	0.582227		0.881542	0.0466213	0.0999382	0.00221278	0.064338	0.00296175	0.0667926	0.371463		641.8	25.2	614	13	751.8	97.2	619.2	11.9		4.8	18.3293
24VG4A	92		45.7822	178.886	0.255929		0.899918	0.0432484	0.10691	0.00228432	0.0610579	0.00238356	0.129844	0.39291		651.7	23.1	654.8	13.3	640.3	84	654.1	12.1		-0.49	-2.26456
24VG4A	93		20.6351	63.0749	0.327152		0.825266	0.0381001	0.100818	0.00240495	0.0599111	0.0022951	0.127439	0.475333		611	21.2	619.2	14.1	599.4	82.9	616.9	12.4		-0.57	-3.3033
24VG4A	94		195.744	364.446	0.537099		0.857856	0.0384162	0.104106	0.00195415	0.0592879	0.00193621	0.184647	0.345219		629	21	638.4	11.4	576.7	71	636.7	10.7		-2.2	-10.6988
24VG4A	95		43.7611	50.3412	0.86929		0.880259	0.0335125	0.104719	0.00173098	0.0603993	0.00135153	0.236984	0.452905		641.1	18.1	642	10.1	616.9	48.3	641.9	9.6		-0.93	-4.06873
24VG4A	96		105.765	314.612	0.336176		0.861237	0.0355639	0.104455	0.00196609	0.0597361	0.00165919	0.256893	0.354448		630.8	19.4	640.5	11.5	593.1	60.2	638.6	10.8		-1.6	-7.99191		x
24VG4A	97		44.0973	71.0729	0.620452		0.828695	0.0311596	0.100135	0.00158814	0.0599288	0.00129774	0.292778	0.40023		612.9	17.3	615.2	9.3	600	46.9	614.9	9		-0.54	-2.53333
24VG4A	98		268.58	295.988	0.9074		0.810658	0.0433849	0.0972018	0.00229983	0.0598699	0.00236574	0.394655	0.165671		602.8	24.3	598	13.5	597.9	85.6	598.5	13.3		-0.083	-0.0167252
24VG4A	99		67.0449	157.036	0.426938		1.06617	0.0489114	0.122755	0.00239674	0.0628034	0.00219674	0.188531	0.364345		736.9	24	746.4	13.8	700.6	74.5	744.5	12.8		-1.6	-6.53725		x
24VG4A	100		132.123	325.896	0.405415		0.881094	0.0349118	0.104692	0.00213231	0.0609136	0.00153802	0.295318	0.493234		641.6	18.8	641.8	12.4	635.2	54.3	641.8	11.6		-0.24	-1.03904
24VG4A	101		81.3354	86.3436	0.941998		0.891839	0.0406564	0.106163	0.0021242	0.0604321	0.00202438	0.224792	0.343767		647.4	21.8	650.4	12.4	618.1	72.3	649.9	11.7		-1.2	-5.22569
24VG4A	102		410.666	655.693	0.626308		0.934656	0.0429819	0.106434	0.00292458	0.0639093	0.00247359	0.171728	0.513831		670.1	22.6	652	17	737.7	81.9	658	14.7		2.7	11.6172
24VG4A	103		39.7482	95.6691	0.415476		0.856066	0.0414528	0.1025	0.00245503	0.0602723	0.00215869	0.232887	0.341299		628	22.7	629	14.4	612.4	77.4	628.8	13.3		-0.61	-2.71065
24VG4A	104		256.946	350.695	0.732676		0.891685	0.0377571	0.103978	0.00189529	0.0620097	0.00180526	0.27636	0.367376		647.3	20.3	637.7	11.1	673.5	62.3	639.1	10.7		1.2	5.31552
24VG4A	105		111.904	1047.25	0.106855		0.860585	0.038674	0.101852	0.00209763	0.0609	0.00195901	0.207647	0.354914		630.4	21.1	625.3	12.3	634.7	69.2	626.3	11.5		0.28	1.48101
24VG4A	106		438.551	733.304	0.598048		0.878753	0.0369579	0.105024	0.00184728	0.0606647	0.00178563	0.151279	0.374081		640.3	20	643.8	10.8	626.4	63.5	643.1	10		-0.6	-2.77778
24VG4A	107		348.966	465.702	0.749333		0.876415	0.0345422	0.102523	0.00159046	0.0617023	0.00141676	0.311749	0.236202		639	18.7	629.2	9.3	662.8	49.2	630.1	9.1		1.2	5.0694
24VG4A	108		176.174	378.947	0.464904		0.846166	0.0358829	0.102021	0.00164627	0.0598597	0.00172216	0.193356	0.270858		622.5	19.7	626.2	9.6	597.5	62.3	625.7	9.2		-1	-4.80335		x
24VG4A	109		132.76	263.798	0.503263		0.814923	0.0364084	0.0990014	0.00178989	0.0594988	0.00189291	0.270241	0.26669		605.2	20.4	608.6	10.5	584.4	69.1	608.1	10.2		-0.86	-4.141
24VG4A	110		143.053	279.639	0.511562		0.934257	0.0371552	0.110047	0.00177698	0.0611927	0.00148582	0.297689	0.324656		669.9	19.5	673	10.3	645.1	52.2	672.6	10		-1	-4.32491
24VG4A	111		173.109	241.643	0.716385		0.887344	0.038496	0.104531	0.00179789	0.0618605	0.00197455	0.179785	0.294281		644.9	20.7	640.9	10.5	668.3	68.3	641.5	10		0.98	4.09996		x
24VG4A	112		41.732	81.1872	0.514022		0.822716	0.0449074	0.0988705	0.00221331	0.0607858	0.00288209	0.108959	0.338078		609.6	25	607.8	13	630.7	102.1	608.1	12		0.83	3.63089
24VG4A	113		153.762	150.442	1.02207		0.84964	0.0324844	0.101717	0.00184373	0.0605369	0.0013945	0.324402	0.388446		624.5	17.8	624.5	10.8	621.9	49.7	624.5	10.3		-0.099	-0.418074
24VG4A	114		69.8066	221.928	0.314547		0.865059	0.0320585	0.102441	0.00149559	0.0610412	0.00127863	0.191072	0.423143		632.9	17.5	628.7	8.7	639.7	45.1	629.3	8.3		0.36	1.71956
24VG4A	115		86.1654	199.152	0.432662		6.85692	0.247047	0.388068	0.00637973	0.127973	0.00253524	0.29198	0.536916		2093.1	31.9	2113.9	29.6	2069.5	34.9	2104.4	24.5		-1.5	-2.14545
24VG4A	116		21.5559	47.2983	0.455743		0.798104	0.038279	0.0977417	0.00269024	0.0588908	0.00221298	0.318226	0.422319		595.8	21.6	601.2	15.8	562.1	81.9	599.6	14.5		-1.3	-6.95606
24VG4A	117		60.1106	105.265	0.57104		0.851625	0.0323874	0.101799	0.00164354	0.0604442	0.0013822	0.32724	0.339039		625.5	17.8	624.9	9.6	618.5	49.3	625	9.4		-0.25	-1.03476
24VG4A	118		94.4732	99.2018	0.952334		0.994461	0.0409511	0.115375	0.00215724	0.0625509	0.00164718	0.312893	0.320314		701	20.8	703.9	12.5	692	56.1	703.4	11.9		-0.41	-1.71965		x
24VG4A	119		34.0275	45.5189	0.747548		0.836233	0.0389156	0.103015	0.00176157	0.0589786	0.00212826	0.0562446	0.375565		617.1	21.5	632.1	10.3	565.3	78.6	629.4	9.5		-2.3	-11.8167
24VG4A	120		57.8241	115.112	0.502331		0.992724	0.0393222	0.115985	0.00194407	0.0619501	0.00152809	0.243159	0.403089		700.1	20	707.4	11.2	671.4	52.8	706.2	10.7		-1.3	-5.36193
24VG4A	121		5.56413	17.5005	0.317941		0.820633	0.0394901	0.0971389	0.00190379	0.0618262	0.00246425	0.104651	0.383731		608.4	22	597.6	11.2	667.1	85.3	599.5	10.4		2.4	10.4182
24VG4A	122		60.8373	250.432	0.242929		0.803854	0.0364413	0.095121	0.00260393	0.0609446	0.00164907	0.594294	0.237934		599	20.5	585.8	15.3	636.3	58.2	587.9	15.1		1.7	7.93651
24VG4A	123		25.1193	103.403	0.242925		0.857544	0.0342404	0.101804	0.00162503	0.0612299	0.00169626	0.0823557	0.451352		628.8	18.7	625	9.5	646.4	59.5	625.7	8.8		0.74	3.31064
24VG4A	124		739.257	371.159	1.99175		0.827244	0.0408611	0.101323	0.00202383	0.0593928	0.00226107	0.225172	0.279504		612.1	22.7	622.2	11.8	580.6	82.7	620.6	11.3		-1.4	-7.165
24VG4A	125		20.7142	18.7038	1.10748		0.83668	0.0298077	0.099799	0.00142669	0.0606211	0.00108337	0.248296	0.483905		617.3	16.5	613.2	8.4	624.8	38.5	613.8	8.1		0.39	1.85659		x
24VG4A	126		56.3558	157.629	0.357522		0.804828	0.0320578	0.0964823	0.00209748	0.0607265	0.00156043	0.376775	0.516492		599.5	18	593.8	12.3	628.6	55.4	595	11.7		1.2	5.53611
24VG4A	127		34.9615	74.7481	0.467724		0.852683	0.0478893	0.103612	0.0020589	0.0597882	0.00291532	0.0459292	0.385104		626.1	26.2	635.5	12	594.9	105.6	634	11.1		-1.4	-6.82468
24VG4A	128		109.526	160.779	0.681222		0.778384	0.0346467	0.0932903	0.00177516	0.0603309	0.00191995	0.260032	0.285988		584.6	19.8	575	10.5	614.5	68.7	576.3	10.1		1.4	6.42799
24VG4A	129		254.092	648.453	0.391843		0.84793	0.0334939	0.101983	0.00165277	0.0599464	0.00139876	0.315376	0.293257		623.5	18.4	626	9.7	600.7	50.5	625.7	9.4		-0.93	-4.21175		x
24VG4A	130		51.6907	131.473	0.393166		0.849419	0.0340961	0.102828	0.00155159	0.0598951	0.0015231	0.226015	0.286175		624.3	18.7	631	9.1	598.8	55.1	630.1	8.8		-1.1	-5.37742		x
24VG4A	131		117.754	163.547	0.720004		0.851988	0.0345211	0.103952	0.0016124	0.0594427	0.00158285	0.223136	0.300703		625.7	18.9	637.5	9.4	582.4	57.8	635.9	9		-1.9	-9.46085		x
24VG4A	132		181.762	259.703	0.699884		0.880806	0.0450101	0.107085	0.00207991	0.0598742	0.00253015	0.0922487	0.351707		641.4	24.3	655.8	12.1	598.1	91.5	653.2	11.2		-1.9	-9.64722
24VG4A	133		59.7401	93.203	0.640968		3.51681	0.124293	0.270082	0.00366245	0.0940514	0.00144433	0.407274	0.33318		1531	27.9	1541.2	18.6	1508.3	29	1539.2	17.8		-1.3	-2.18126		x
24VG4A	134		99.0909	106.989	0.926175		0.901049	0.0341496	0.10729	0.00169509	0.061171	0.00126193	0.323685	0.306562		652.3	18.2	657	9.9	644.3	44.3	656.4	9.6		-0.43	-1.97113
24VG4A	135		20.5114	639.647	0.0320668		1.11961	0.064278	0.122476	0.00280333	0.0667834	0.00345242	0.0404406	0.40193		762.8	30.8	744.8	16.1	830.1	107.8	748.4	14.6		3	10.2759
24VG4A	136		692.347	693.749	0.99798		0.800248	0.047115	0.098688	0.00229185	0.0594646	0.00310625	0.116794	0.288094		597	26.6	606.7	13.4	583.2	113.4	605	12.5		-0.73	-4.02949		x
24VG4A	137		465.71	764.422	0.609232		0.874265	0.0378012	0.106413	0.00190479	0.0596222	0.00180786	0.240232	0.342203		637.9	20.5	651.9	11.1	588.9	65.8	649.6	10.6		-2.2	-10.6979
24VG4A	138		189.125	305.89	0.618278		0.830411	0.0296977	0.0990904	0.00130281	0.0607009	0.00106323	0.263518	0.386809		613.8	16.5	609.1	7.6	627.7	37.7	609.5	7.5		0.66	2.9632
24VG4A	139		82.1449	124.639	0.659064		0.825554	0.028959	0.0997736	0.00123908	0.0597825	0.000902502	0.379782	0.316906		611.1	16.1	613.1	7.3	594.7	32.7	613	7.2		-0.69	-3.094
24VG4A	140		129.546	279.571	0.463375		0.843285	0.0454521	0.101746	0.00209771	0.0603319	0.00279848	0.0674503	0.35118		621	25	624.6	12.3	614.5	100.2	624	11.3		-0.32	-1.64361		x
24VG4A	141		52.5882	114.477	0.459378		0.830775	0.038127	0.0996996	0.00176689	0.0607397	0.00213486	0.158095	0.282761		614	21.1	612.7	10.4	629.1	75.7	612.9	9.8		0.6	2.6069		x
24VG4A	142		3.897	12.4924	0.311948		0.843301	0.0431441	0.103323	0.00195982	0.0593935	0.00241965	0.164558	0.254551		621	23.8	633.9	11.5	580.6	88.5	632	10.9		-1.8	-9.18016		x
24VG4A	143		12.0025	25.4355	0.471879		0.807153	0.0329924	0.0992486	0.00155243	0.0588358	0.00155356	0.169447	0.341109		600.9	18.5	610	9.1	560.1	57.6	608.6	8.6		-1.7	-8.90912		x
24VG4A	144		254.352	477.726	0.532422		0.824175	0.0310826	0.100123	0.00143843	0.0593963	0.00118269	0.333902	0.273478		610.4	17.3	615.1	8.4	580.7	43.3	614.7	8.3		-1.3	-5.92388
24VG4A	145		26.4333	43.4183	0.608805		0.791916	0.0388443	0.0941902	0.00186877	0.0601989	0.00206164	0.342344	0.154914		592.3	22	580.3	11	609.8	74	581.3	10.9		1	4.83765
24VG4A	146		305.58	305.59	0.999966		0.83658	0.0385782	0.10056	0.00182596	0.0606245	0.0021871	0.155406	0.356729		617.3	21.3	617.7	10.7	625	77.8	617.6	10.1		0.28	1.168		x
24VG4A	147		22.3981	657.823	0.0340487		0.849713	0.0363139	0.101244	0.00151399	0.061077	0.00192028	0.118823	0.362593		624.5	19.9	621.7	8.9	641	67.6	622.1	8.4		0.69	3.01092
24VG4A	148		42.1658	52.7268	0.799704		0.833734	0.033803	0.101393	0.00145519	0.0594824	0.00161283	0.160949	0.36699		615.7	18.7	622.6	8.5	583.8	58.9	621.7	8.2		-1.4	-6.64611
24VG4A	149		21.0207	78.6435	0.267291		0.846591	0.0333836	0.102062	0.00154302	0.0601118	0.0016092	0.0974612	0.414968		622.8	18.4	626.5	9	606.6	57.9	625.9	8.4		-0.69	-3.28058
24VG4A	150		52.7628	169.399	0.311471		0.814224	0.0346161	0.0992546	0.00145254	0.0592263	0.00164744	0.235668	0.209779		604.8	19.4	610	8.5	574.4	60.5	609.6	8.3		-1.3	-6.19777
24VG4A	151		65.8933	123.362	0.534147		0.818121	0.0340385	0.0997926	0.00148379	0.0594769	0.00165265	0.145552	0.264596		607	19	613.2	8.7	583.6	60.3	612.4	8.3		-1	-5.07197
24VG4A	152		71.2152	408.623	0.174281		0.876904	0.0449977	0.103657	0.00273047	0.0604843	0.00243933	0.258883	0.392128		639.3	24.3	635.8	15.9	620	87	636.6	14.8		-0.69	-2.54839
24VG4A	153		141.831	528.258	0.268487		0.836811	0.038773	0.0996397	0.00179211	0.0603228	0.00210582	0.0648348	0.377003		617.4	21.4	612.3	10.5	614.2	75.4	613.2	9.7		0.11	0.309345
24VG4A	154		25.6408	19.3184	1.32727		0.855631	0.0615705	0.0997025	0.00310904	0.0636342	0.00439994	0.0766344	0.281344		627.7	33.7	612.7	18.2	728.5	146.6	615.7	16.6		4.1	15.8957
24VG4A	155		30.6414	80.8889	0.378808		0.94682	0.0358409	0.110557	0.00157487	0.0619458	0.00141082	0.148437	0.427205		676.4	18.7	676	9.1	671.3	48.7	676.1	8.6		-0.19	-0.700134
24VG4A	156		216.174	262.312	0.824107		0.788826	0.0364046	0.0944283	0.00164575	0.0604332	0.00206526	0.0997013	0.322015		590.5	20.7	581.7	9.7	618.1	73.8	583	9.1		1.2	5.88901		x
24VG4A	157		117.564	124.583	0.943655		0.828144	0.0452822	0.101061	0.00204288	0.0590616	0.00260975	0.109175	0.27888		612.6	25.2	620.6	12	568.4	96.2	619.4	11.2		-1.8	-9.18367
24VG4A	158		160.352	185.704	0.863479		1.27079	0.0450358	0.139931	0.00204714	0.0656196	0.0012533	0.0969366	0.593554		832.7	20.1	844.3	11.6	793.3	40.1	841.6	10.4		-1.8	-6.42884		x
24VG4A	159		219.09	609.94	0.359199		0.860404	0.0315397	0.103983	0.00144955	0.0602006	0.00120077	0.288897	0.34023		630.3	17.2	637.7	8.5	609.8	43.1	636.9	8.3		-0.98	-4.57527
24VG4A	160		275.527	482.11	0.571504		0.81415	0.0554399	0.0948072	0.00303447	0.0629153	0.00427797	0.100324	0.45102		604.8	31	583.9	17.9	704.4	144.7	588.5	16.2		4.1	17.1068
24VG4A	161		47.4417	124.8	0.380143		0.836221	0.0569695	0.0959105	0.00259527	0.0637783	0.00395831	0.172904	0.271321		617.1	31.5	590.4	15.3	733.3	131.4	594	14.6		5.1	19.4872
24VG4A	162		291.862	630.424	0.462962		0.853353	0.0363205	0.101619	0.00169071	0.0608036	0.00180059	0.180518	0.348571		626.5	19.9	623.9	9.9	631.3	63.8	624.3	9.4		0.25	1.17218		x
24VG4B	1		53.8871	98.9273	0.544715		0.847176	0.0343496	0.0995743	0.00229074	0.0620522	0.00212113	0.187661	0.302892		623.1	18.9	611.9	13.4	674.9	73.1	615.2	11.9		2.1	9.33472
24VG4B	2		134.794	231.335	0.582679		0.82765	0.0314448	0.0975674	0.00223941	0.0619279	0.00178964	0.352558	0.157957		612.3	17.5	600.1	13.2	670.7	61.8	603.6	12.1		2.3	10.5263
24VG4B	3		202.443	305.862	0.661876		0.837395	0.0260785	0.100562	0.00216399	0.0603972	0.00129799	0.245671	0.328221		617.7	14.4	617.7	12.7	616.9	46.4	617.7	10.6		-0.032	-0.129681
24VG4B	4		91.9651	134.516	0.683672		0.847994	0.0298034	0.0996891	0.00211598	0.0620843	0.00166492	0.251262	0.24797		623.5	16.4	612.6	12.4	676	57.3	616.1	11		2.1	9.3787
24VG4B	5		76.1213	128.382	0.592928		0.84498	0.0310788	0.101984	0.00228751	0.0603747	0.00180198	0.243762	0.265939		621.9	17.1	626	13.4	616.1	64.4	624.6	11.7		-0.28	-1.60688
24VG4B	6		37.3718	57.4395	0.650629		0.813629	0.0366235	0.0973843	0.00236843	0.0608714	0.00246313	0.0421448	0.373782		604.5	20.5	599.1	13.9	633.7	87.1	600.7	11.8		1.1	5.46
24VG4B	7		79.984	179.603	0.445337		0.812362	0.0271141	0.0993294	0.0021075	0.0596864	0.00163551	0.0702761	0.416403		603.8	15.2	610.5	12.4	591.2	59.4	607.8	9.9		-0.55	-3.26455
24VG4B	8		51.6588	353.505	0.146133		0.813697	0.0264564	0.0971283	0.00206411	0.0605146	0.00152443	0.18639	0.335743		604.5	14.8	597.6	12.1	621.1	54.3	600.2	10.2		0.68	3.78361
24VG4B	9		35.248	67.1548	0.524877		0.872323	0.0383675	0.103747	0.00258896	0.061235	0.00239594	0.150122	0.345853		636.8	20.8	636.3	15.1	646.5	84.1	636.5	13.1		0.37	1.57773
24VG4B	10		80.9468	156.094	0.518578		0.840083	0.0299856	0.100312	0.00221962	0.0608505	0.00174593	0.136187	0.387757		619.2	16.5	616.2	13	633	61.8	617.3	10.9		0.54	2.65403
24VG4B	11		68.5136	116.437	0.588415		0.83809	0.0326139	0.0983625	0.00229949	0.0622728	0.0020404	0.20195	0.318218		618.1	18	604.8	13.5	682.5	70	609.1	11.8		2.5	11.3846
24VG4B	12		230.841	286.44	0.805894		0.8426	0.0292488	0.0986635	0.00221892	0.0622744	0.00168334	0.239523	0.325257		620.6	16.1	606.6	13	682.6	57.7	611.6	11.3		2.4	11.1339
24VG4B	13		353.675	205.439	1.72155		0.859079	0.0302911	0.105149	0.0024875	0.059425	0.00169534	0.220539	0.395555		629.6	16.5	644.5	14.5	581.7	61.9	638.2	12		-1.9	-10.7959
24VG4B	14		70.1732	172.054	0.407855		0.8272	0.0302833	0.100555	0.00227929	0.0597918	0.00169273	0.266888	0.276332		612.1	16.8	617.7	13.3	595.1	61.4	615.7	11.7		-0.68	-3.79768
24VG4B	15		100.948	217.261	0.464641		0.812342	0.0279814	0.0976307	0.00215895	0.0605171	0.00155432	0.278293	0.280132		603.8	15.7	600.5	12.7	621.1	55.4	601.7	11.1		0.67	3.3167
24VG4B	16		70.713	107.614	0.657099		0.84024	0.0319734	0.103532	0.00244402	0.0591379	0.00187963	0.205668	0.336655		619.3	17.6	635.1	14.3	571.2	69.2	629.2	12.1		-1.9	-11.187
24VG4B	17		76.7677	174.431	0.440104		6.38697	0.223893	0.364365	0.0097344	0.127009	0.00326744	0.462788	0.342889		2030.5	30.8	2002.8	46	2056.2	45.4	2025.7	30.3		1.3	2.59702
24VG4B	18		90.2492	205.149	0.439919		0.882424	0.0286647	0.105753	0.00229706	0.060795	0.00143958	0.294639	0.343234		642.3	15.5	648	13.4	631	51	645.7	11.5		-0.48	-2.69414
24VG4B	19		186.08	203.278	0.915393		0.850638	0.0288081	0.102168	0.00225633	0.0608059	0.00149456	0.354993	0.224292		625	15.8	627.1	13.2	631.4	53	626.3	11.7		0.26	0.681026
24VG4B	20		41.9787	60.9196	0.689083		0.802799	0.0347417	0.0996797	0.00254781	0.0589721	0.00219709	0.216719	0.296597		598.4	19.6	612.5	14.9	565.1	81.1	607.8	13		-1.4	-8.3879
24VG4B	21		66.1411	114.783	0.576228		0.817223	0.0333796	0.0995094	0.00223554	0.059182	0.00191373	0.226344	0.187252		606.5	18.7	611.5	13.1	572.8	70.3	610.1	11.8		-1.3	-6.75628
24VG4B	22		107.913	139.067	0.775975		0.821609	0.0283611	0.0977933	0.00215671	0.0612557	0.00162135	0.212528	0.287065		608.9	15.8	601.5	12.7	647.3	56.8	604.2	10.9		1.5	7.07554
24VG4B	23		36.7393	66.1117	0.555716		0.835985	0.0361098	0.0974593	0.00222189	0.0622123	0.00236184	0.108634	0.344146		616.9	20	599.5	13.1	680.4	81.1	604.2	11.5		2.6	11.8901
24VG4B	24		76.694	122.659	0.625259		0.831297	0.032182	0.100831	0.00231173	0.0600998	0.00194262	0.233324	0.293029		614.3	17.8	619.3	13.5	606.2	69.9	617.7	11.9		-0.37	-2.161
24VG4B	25		46.083	62.8402	0.733337		0.835484	0.0344985	0.0976045	0.00256173	0.0629366	0.0023644	0.110672	0.403889		616.7	19.1	600.4	15	705.1	79.9	606.3	12.5		3.4	14.849
24VG4B	26		27.9205	47.28	0.590535		0.800578	0.036267	0.0994376	0.00260836	0.0597409	0.00258058	0.166571	0.331941		597.2	20.5	611.1	15.3	593.2	93.6	606.4	13.1		-0.6	-3.01753
24VG4B	27		157.925	247.956	0.636905		0.848411	0.0266487	0.10207	0.00220366	0.060733	0.00124959	0.408167	0.24906		623.8	14.6	626.5	12.9	628.8	44.3	625.4	11.4		0.24	0.365776
24VG4B	28		82.8663	296.254	0.279714		0.840798	0.0256209	0.102114	0.00210487	0.0598735	0.00121507	0.363505	0.246193		619.6	14.1	626.8	12.3	598.1	43.9	623.9	10.8		-0.85	-4.79853
24VG4B	29		114.408	157.651	0.725701		0.83133	0.0351298	0.0978213	0.00254752	0.0616351	0.00224999	0.22686	0.319692		614.3	19.5	601.6	15	660.5	78.2	605.8	13.1		1.8	8.91749
24VG4B	30		98.3292	176.869	0.555945		0.818023	0.0299892	0.0976139	0.00218157	0.0608082	0.00168231	0.359756	0.172508		606.9	16.7	600.4	12.8	631.5	59.6	602.4	11.8		0.99	4.92478
24VG4B	31		84.9729	140.15	0.6063		0.833021	0.032326	0.101038	0.00241207	0.0604548	0.00206448	0.166563	0.370888		615.3	17.9	620.5	14.1	618.9	73.7	618.6	11.9		-0.27	-0.258523
24VG4B	32		39.1605	216.447	0.180924		0.798118	0.0262075	0.098058	0.00206674	0.0592348	0.00146615	0.19795	0.3507		595.8	14.8	603	12.1	574.8	53.8	600.3	10.2		-0.84	-4.90605
24VG4B	33		27.1243	37.8355	0.716899		0.849069	0.0443699	0.105456	0.00260475	0.0589278	0.00285992	0.149257	0.29003		624.1	24.4	646.3	15.2	563.5	105.7	640.7	13.6		-2.6	-14.6939
24VG4B	34		82.886	196.064	0.422749		0.808185	0.0283109	0.0974389	0.00220129	0.0598377	0.00155271	0.288016	0.312079		601.4	15.9	599.4	12.9	596.7	56.2	600.1	11.3		-0.2	-0.452489
24VG4B	35		49.1494	75.1401	0.654104		0.78543	0.0311923	0.0974469	0.00212936	0.0585341	0.00196784	0.0929525	0.328316		588.6	17.7	599.4	12.5	548.8	73.4	596	10.6		-1.6	-9.22012
24VG4B	36		17.1537	53.0611	0.323283		0.886133	0.0444072	0.102291	0.00255085	0.0633481	0.00288986	0.185115	0.133933		644.3	23.9	627.8	14.9	719	96.8	631.6	13.7		3.1	12.6843
24VG4B	37		82.0121	133.242	0.615511		0.910356	0.0301254	0.106619	0.00229451	0.0622601	0.00162164	0.175742	0.37777		657.2	16	653.1	13.4	682.1	55.6	654.7	11.1		0.96	4.25158
24VG4B	38		46.4695	63.0686	0.736809		0.850859	0.0345232	0.0987773	0.00227687	0.0630476	0.00221799	0.177118	0.291751		625.1	18.9	607.2	13.4	708.9	74.8	612.5	11.8		3.4	14.3462
24VG4B	39		177.674	443.837	0.400313		0.83519	0.0236359	0.101186	0.00212763	0.0596027	0.00108022	0.272596	0.52244		616.5	13.1	621.4	12.5	588.2	39.3	619.1	10.2		-1	-5.64434
24VG4B	40		65.6983	113.629	0.578183		0.812594	0.028538	0.0964097	0.00207296	0.0613068	0.0016232	0.27656	0.225436		603.9	16	593.3	12.2	649.1	56.9	596.7	10.9		1.8	8.59652
24VG4B	41		88.3805	125.134	0.706288		0.830905	0.029169	0.101195	0.00211378	0.0596727	0.00167168	0.204986	0.321624		614.1	16.2	621.4	12.4	590.8	60.8	618.9	10.7		-0.94	-5.17942
24VG4B	42		276.612	1048.5	0.263817		0.806852	0.0248638	0.0997877	0.00243042	0.058698	0.00125511	0.260357	0.489533		600.7	14	613.2	14.2	554.9	46.6	606.7	11.1		-1.7	-10.5064
24VG4B	43		159.868	294.302	0.543212		0.822916	0.0240899	0.0989065	0.00200908	0.0603588	0.00124386	0.0943278	0.467761		609.7	13.4	608	11.8	615.5	44.5	608.7	9.3		0.22	1.21852
24VG4B	44		193.639	311.711	0.621213		0.788659	0.0280401	0.0978211	0.00244602	0.058191	0.00154113	0.387197	0.286903		590.4	15.9	601.6	14.4	536	58	596.9	12.5		-2	-12.2388
24VG4B	45		37.5213	68.4212	0.548387		0.856919	0.0341473	0.102252	0.00231655	0.0609299	0.00203896	0.16937	0.315937		628.4	18.7	627.6	13.6	635.8	72	627.9	11.8		0.28	1.28971
24VG4B	46		153.688	261.257	0.588262		0.714629	0.0219433	0.0880482	0.00183057	0.0590296	0.00128119	0.268728	0.321966		547.5	13	544	10.8	567.2	47.2	545.3	9.4		0.74	4.09027
24VG4B	47		24.0169	51.2374	0.468737		0.892207	0.0363767	0.10366	0.00249724	0.0627735	0.0022469	0.129693	0.369287		647.6	19.5	635.8	14.6	699.6	76.2	639.7	12.4		2.1	9.1195
24VG4B	48		33.4516	89.4399	0.374012		0.821933	0.0317292	0.0987372	0.00229088	0.0602348	0.00188018	0.195294	0.314964		609.1	17.7	607	13.4	611.1	67.4	607.7	11.7		0.12	0.670921
24VG4B	49		102.389	156.346	0.654887		0.71867	0.0246633	0.0907707	0.00195752	0.0576809	0.00152486	0.163169	0.366539		549.9	14.6	560.1	11.6	516.7	58.1	556.3	9.7		-1.3	-8.39946
24VG4B	50		5.91446	9.90638	0.597035		0.812406	0.0846386	0.0789126	0.00379708	0.0805073	0.00858308	0.124664	0.57025		603.8	47.4	489.6	22.7	1208.6	209.9	504.4	21.8		27	59.4903
24VG4B	51		33.4909	83.278	0.402158		0.795737	0.0285591	0.0985697	0.0021801	0.0589282	0.00179618	0.101054	0.414611		594.4	16.1	606	12.8	563.5	66.4	601.7	10.5		-1.2	-7.54215
24VG4B	52		163.028	272.861	0.597475		0.725349	0.0223228	0.0901801	0.0018868	0.0582898	0.00128965	0.265275	0.367751		553.8	13.1	556.6	11.2	539.7	48.4	555.5	9.5		-0.53	-3.13137
24VG4B	53		742.156	858.749	0.864228		0.833754	0.027251	0.100545	0.00229935	0.0598485	0.0012796	0.465273	0.24773		615.7	15.1	617.6	13.5	597.1	46.3	616.8	12.1		-0.7	-3.43326
24VG4B	54		223.822	348.928	0.641455		0.856953	0.0249263	0.102601	0.00213448	0.0604682	0.00117734	0.212672	0.456847		628.5	13.6	629.6	12.5	619.4	42	629.1	10.1		-0.34	-1.64675
24VG4B	55		75.1127	101.084	0.743071		0.831436	0.0309343	0.0977555	0.00222299	0.0619831	0.00193884	0.156806	0.377894		614.4	17.2	601.2	13.1	672.6	66.9	605.7	11.2		2.3	10.6155
24VG4B	56		93.8689	162.228	0.578623		0.819089	0.0283494	0.10061	0.00216923	0.0590776	0.00163854	0.131296	0.391293		607.5	15.8	618	12.7	569	60.4	614	10.5		-1.5	-8.6116
24VG4B	57		464.169	456.305	1.01724		0.799949	0.0235444	0.0976073	0.00209507	0.0590734	0.00101392	0.46401	0.310802		596.8	13.3	600.4	12.3	568.8	37.4	598.8	10.9		-1	-5.55556
24VG4B	58		272.076	439.421	0.619169		0.812458	0.0238045	0.0983944	0.00204328	0.0599078	0.00114546	0.306271	0.384972		603.8	13.3	605	12	599.3	41.4	604.5	10.2		-0.17	-0.95111
24VG4B	59		84.7284	95.2946	0.88912		0.845232	0.033922	0.101982	0.00230076	0.0602438	0.00204385	0.190368	0.279576		622	18.7	626	13.5	611.4	73.3	624.8	11.8		-0.45	-2.38796
24VG4B	60		298.029	368.705	0.808312		0.832279	0.0252318	0.101072	0.00213298	0.059732	0.00115138	0.418488	0.230363		614.9	14	620.7	12.5	592.9	41.8	618.3	11		-0.85	-4.68882
24VG4B	61		94.1772	193.081	0.48776		0.83076	0.0280684	0.100205	0.00227501	0.0602473	0.00148861	0.204962	0.292314		614	15.6	615.6	13.3	611.5	53.4	615	11.1		-0.12	-0.670482
24VG4B	62		47.2083	94.2999	0.500619		0.824107	0.0303279	0.0982487	0.00225455	0.0611218	0.00186169	0.0992175	0.410844		610.3	16.9	604.1	13.2	642.6	65.5	606.4	10.9		1.2	5.99129
24VG4B	63		135.095	199.444	0.677359		0.818053	0.0256727	0.0981942	0.00207389	0.0603407	0.00132831	0.218826	0.352166		607	14.3	603.8	12.2	614.9	47.5	605.1	10.2		0.32	1.80517
24VG4B	64		35.419	55.9807	0.632701		0.812878	0.0364264	0.0980595	0.00250711	0.0602435	0.00237341	0.221881	0.292439		604.1	20.4	603	14.7	611.3	85.1	603.3	13.1		0.28	1.35776
24VG4B	65		96.4171	232.686	0.414365		0.852136	0.0256549	0.102824	0.00210552	0.0600474	0.00124006	0.190199	0.42101		625.8	14.1	630.9	12.3	604.3	44.7	628.8	10.1		-0.82	-4.40179
24VG4B	66		14.0966	30.4732	0.462589		0.86489	0.0459337	0.10201	0.00277734	0.062063	0.00303887	0.144002	0.264558		632.8	25	626.2	16.2	675.3	104.7	627.9	14.5		1.7	7.27084
24VG4B	67		36.8877	101.377	0.363868		0.692259	0.0323456	0.0833656	0.00235978	0.0607148	0.00272529	0.187459	0.378039		534.2	19.4	516.2	14	628.2	96.7	521.6	12.4		3.6	17.8287
24VG4B	68		65.0713	129.56	0.502248		0.869193	0.0312815	0.102783	0.0022506	0.0615477	0.00176331	0.151896	0.397168		635.1	17	630.7	13.2	657.5	61.4	632.3	11.2		0.87	4.07605
24VG4B	69		67.6869	280.392	0.241401		0.739896	0.0234777	0.091682	0.00187878	0.0585314	0.00126398	0.328221	0.209055		562.3	13.7	565.5	11.1	548.7	47.2	564.4	9.9		-0.52	-3.06178
24VG4B	70		36.0492	176.749	0.203957		0.856317	0.0305543	0.103647	0.00227473	0.0599237	0.00170969	0.189092	0.321416		628.1	16.7	635.7	13.3	599.9	61.8	633	11.3		-1.1	-5.96766
24VG4B	71		98.5106	242.213	0.406711		13.2979	0.34501	0.517931	0.0103134	0.186011	0.00224903	0.561815	0.505243		2701	24.5	2690.4	43.8	2706.5	20	2701	24.6		0.35	0.594864
24VG4B	72		43.8935	399.057	0.109993		0.841995	0.0342941	0.0998252	0.00281212	0.0611595	0.00178543	0.483593	0.131136		620.2	18.9	613.4	16.5	643.9	62.7	615.9	15.1		0.94	4.73676
24VG4B	73		73.6026	166.774	0.441332		0.698163	0.0233388	0.0873097	0.00182492	0.0577657	0.00150736	0.14943	0.336697		537.7	14	539.6	10.8	519.9	57.3	538.9	9.1		-0.66	-3.78919
24VG4B	74		404.929	532.219	0.760832		0.777809	0.0258743	0.0954007	0.0021946	0.0589316	0.00145346	0.280738	0.328069		584.2	14.8	587.4	12.9	563.6	53.7	586.1	11		-0.77	-4.22285
24VG4B	75		29.3401	65.512	0.447859		0.912668	0.0359754	0.105336	0.00233175	0.0632886	0.00217213	0.0958535	0.319825		658.5	19.1	645.6	13.6	717	72.9	649.7	11.6		2.4	9.95816
24VG4B	76		127.471	227.915	0.559292		0.826639	0.0264004	0.100042	0.00204691	0.0599525	0.00134565	0.275567	0.257041		611.7	14.7	614.7	12	600.9	48.6	613.6	10.4		-0.42	-2.29656
24VG4B	77		94.912	164.634	0.576502		0.845416	0.0299984	0.10194	0.00208721	0.0603066	0.00167593	0.172445	0.264775		622.1	16.5	625.8	12.2	613.6	60	624.6	10.6		-0.36	-1.98827
24VG4B	78		25.557	37.7898	0.676295		0.832252	0.0393348	0.099138	0.00266286	0.0609349	0.0026128	0.0605055	0.420276		614.9	21.8	609.4	15.6	636	92.3	611.2	13.1		0.84	4.18239
24VG4B	79		85.8791	149.962	0.572671		0.801702	0.0283467	0.09709	0.00207723	0.0599734	0.00165393	0.231437	0.297666		597.8	16	597.3	12.2	601.6	59.7	597.5	10.7		0.15	0.714761
24VG4B	80		109.215	196.735	0.555136		0.836857	0.0275524	0.101411	0.00214646	0.0597057	0.00137342	0.355616	0.236359		617.4	15.2	622.7	12.6	592	49.9	620.8	11.2		-0.99	-5.18581
24VG4B	81		126.902	181.638	0.698655		0.841801	0.0297074	0.0993491	0.00224646	0.0620167	0.0016785	0.341121	0.258071		620.1	16.4	610.6	13.2	673.7	57.9	613.8	11.9		2.1	9.36619
24VG4B	82		62.9515	168.442	0.373729		0.823938	0.0274536	0.0993565	0.00214759	0.0603643	0.0015753	0.186138	0.357894		610.2	15.3	610.6	12.6	615.7	56.3	610.5	10.6		0.21	0.828325
24VG4B	83		47.0615	44.3954	1.06005		4.44948	0.140544	0.305305	0.00687402	0.1056	0.00225338	0.385461	0.370722		1721.6	26.2	1717.6	33.9	1724	39.2	1720.4	24.2		0.16	0.37123
24VG4B	84		99.0114	274.965	0.360087		0.877011	0.0271481	0.10555	0.00215697	0.0609582	0.0012692	0.402086	0.217329		639.4	14.7	646.9	12.6	636.8	44.8	644	11.2		-0.34	-1.58606
24VG4B	85		36.6803	102.231	0.358797		0.829248	0.0311969	0.0997105	0.00215337	0.0604327	0.00195902	0.0954585	0.369858		613.2	17.3	612.7	12.6	618.1	70	612.9	10.6		0.19	0.873645
24VG4B	86		200.619	244.083	0.821929		0.826511	0.0253914	0.0981462	0.00204278	0.0609021	0.00135015	0.252909	0.392119		611.7	14.1	603.5	12	634.8	47.7	606.7	10.2		0.92	4.93069
24VG4B	87		164.047	182.328	0.899736		0.821993	0.0274148	0.0991836	0.00232922	0.0602892	0.00146068	0.401841	0.271898		609.2	15.3	609.6	13.7	613	52.4	609.4	12		0.15	0.554649
24VG4B	88		72.5607	199.768	0.363226		0.823493	0.0247718	0.100821	0.00210633	0.0593878	0.00125417	0.20024	0.432981		610	13.8	619.2	12.3	580.4	45.9	615.2	10		-1.1	-6.68504
24VG4B	89		30.7997	902.428	0.0341298		0.821607	0.0238037	0.0979047	0.0020722	0.0607308	0.000955135	0.548438	0.242451		608.9	13.3	602.1	12.2	628.8	33.9	604.9	11.2		0.79	4.24618
24VG4B	90		153.344	242.93	0.631226		0.839081	0.0256731	0.100239	0.00208433	0.0608527	0.00126358	0.315801	0.308276		618.6	14.2	615.8	12.2	633.1	44.7	616.9	10.6		0.55	2.73259
24VG4B	91		203.234	257.869	0.788126		0.880452	0.0276961	0.105178	0.00229415	0.0603324	0.00120368	0.422694	0.266883		641.2	15	644.7	13.4	614.5	43.1	643.3	11.8		-1	-4.91456
24VG4B	92		81.7968	163.48	0.500349		0.827082	0.0278386	0.0982116	0.00215151	0.061621	0.00167706	0.219097	0.349309		612	15.5	603.9	12.6	660	58.3	606.9	10.8		1.8	8.5
24VG4B	93		124.1	187.953	0.66027		0.825322	0.0299196	0.0977531	0.00216323	0.061203	0.00173266	0.274542	0.264941		611	16.6	601.2	12.7	645.4	60.8	604.3	11.4		1.4	6.84847
24VG4B	94		52.6086	90.139	0.583639		0.830133	0.0335779	0.0987603	0.00231229	0.0607562	0.00208217	0.130775	0.339521		613.7	18.6	607.1	13.6	629.6	73.8	609.3	11.6		0.67	3.5737
24VG4B	95		89.9881	174.938	0.5144		0.782842	0.0261562	0.095076	0.00203146	0.05982	0.00162599	0.125069	0.379257		587.1	14.9	585.5	12	596.1	58.9	586.1	9.9		0.34	1.77823
24VG4B	96		50.8935	81.1236	0.627357		0.86009	0.0420247	0.100693	0.00278513	0.062426	0.00262894	0.267047	0.221459		630.2	22.9	618.5	16.3	687.8	89.9	621.7	14.9		2.3	10.0756
24VG4B	97		66.7441	99.208	0.672769		0.880568	0.0347925	0.105343	0.00238927	0.0609589	0.00218098	0.028901	0.406735		641.3	18.8	645.6	13.9	636.8	77	644.1	11.3		-0.25	-1.38191
24VG4B	98		58.5579	109.566	0.534453		0.861008	0.0316699	0.10232	0.00228708	0.0610452	0.00181402	0.201617	0.268223		630.7	17.3	628	13.4	639.9	63.9	628.9	11.6		0.37	1.85967
24VG4B	99		79.528	110.405	0.720332		0.828862	0.0324264	0.101055	0.00235601	0.0596737	0.00198975	0.139598	0.33991		613	18	620.6	13.8	590.8	72.3	617.9	11.6		-0.9	-5.04401
24VG4B	100		32.2124	50.1391	0.64246		0.808887	0.0366495	0.0975184	0.00261826	0.0602125	0.00237998	0.224	0.29248		601.8	20.6	599.8	15.4	610.2	85.4	600.5	13.6		0.33	1.70436
24VG4B	101		199.041	282.717	0.704027		0.849942	0.0285586	0.100662	0.00226707	0.0612594	0.00136883	0.495598	0.115178		624.6	15.7	618.3	13.3	647.4	48	620.4	12.3		0.91	4.4949
24VG4B	102		28.271	51.6424	0.547437		0.859402	0.0412381	0.098243	0.00248324	0.0637396	0.00277275	0.200003	0.220903		629.8	22.5	604.1	14.6	732.1	92.2	610.3	13.4		4.3	17.484
24VG4B	103		68.8746	166.843	0.412811		0.808931	0.0278749	0.0976107	0.00223123	0.0600819	0.00160772	0.280824	0.322148		601.9	15.6	600.4	13.1	605.6	57.9	600.9	11.3		0.15	0.858653
24VG4B	104		130.882	232.065	0.563987		0.850152	0.0321845	0.10158	0.00228855	0.0601682	0.00166868	0.379947	0.0908762		624.7	17.7	623.7	13.4	608.6	60	624	12.4		-0.6	-2.4811
24VG4B	105		64.8821	109.818	0.590816		0.855901	0.0329407	0.101314	0.00235252	0.0608641	0.00199678	0.0525336	0.385474		627.9	18	622.1	13.8	633.5	70.6	624.2	11.2		0.32	1.79953
24VG4B	106		51.2841	129.996	0.394505		0.818668	0.0297135	0.0982737	0.00219011	0.060665	0.00178485	0.241841	0.311187		607.3	16.6	604.3	12.9	626.4	63.4	605.3	11.3		0.74	3.5281
24VG4B	107		96.483	160.668	0.60051		0.806595	0.0279753	0.0974206	0.00230444	0.0605299	0.00169691	0.269067	0.308006		600.5	15.7	599.3	13.5	621.6	60.5	599.8	11.5		0.79	3.58752
24VG4B	108		88.6334	120.182	0.737494		0.843603	0.0315765	0.10093	0.00226717	0.0605977	0.00181575	0.242163	0.275469		621.1	17.4	619.9	13.3	624	64.6	620.3	11.7		0.12	0.657051
24VG4B	109		162.671	340.963	0.477092		0.81512	0.0345525	0.0963655	0.00292513	0.0615673	0.00212078	0.440936	0.222743		605.3	19.3	593.1	17.2	658.1	73.9	597.9	15.5		2	9.87692
24VG4B	110		66.7745	88.2418	0.756722		0.818789	0.0339346	0.0974751	0.00230459	0.0603023	0.00193156	0.332609	0.175645		607.4	18.9	599.6	13.5	613.5	69.2	601.6	12.6		0.39	2.26569
24VG4B	111		48.4117	61.0818	0.792572		0.887611	0.0423032	0.104923	0.00274581	0.0602575	0.0024347	0.268616	0.264314		645.1	22.8	643.2	16	611.8	87.3	643.7	14.6		-1.2	-5.1324
24VG4B	112		54.1863	81.2755	0.666699		0.810757	0.0364822	0.0994747	0.00257491	0.0588951	0.00222674	0.222813	0.280425		602.9	20.5	611.3	15.1	562.2	82.4	608.7	13.3		-1.6	-8.73355
24VG4B	113		152.923	434.621	0.351853		3.53278	0.11626	0.240111	0.00564655	0.105799	0.00187443	0.711776	-0.00228894		1534.6	26	1387.3	29.4	1727.4	32.5	1474.1	28.9		9.6	19.6885
24VG4B	114		86.016	151.926	0.566169		0.846369	0.0304563	0.100316	0.0022316	0.0611895	0.00165852	0.305408	0.276047		622.7	16.7	616.3	13.1	644.9	58.3	618.3	11.7		0.9	4.4348
24VG4B	115		100.587	113.028	0.889925		0.807896	0.0331764	0.0961126	0.00231222	0.0609223	0.00213725	0.190837	0.310309		601.3	18.6	591.6	13.6	635.5	75.5	594.6	12		1.4	6.90795
24VG4B	116		28.789	66.6747	0.431783		0.905911	0.0449351	0.101649	0.00251973	0.0644005	0.00258785	0.375573	0.0379177		654.9	23.9	624.1	14.7	753.9	84.8	628.7	14.4		4.5	17.2171
24VG4B	117		76.3956	103.056	0.741299		0.828588	0.0325131	0.0982823	0.00222735	0.0607845	0.00187162	0.221844	0.242961		612.8	18.1	604.3	13.1	630.6	66.3	606.9	11.7		0.78	4.17063
24VG4B	118		20.971	62.6189	0.334898		0.697706	0.030786	0.0887057	0.00220905	0.0570801	0.00226865	0.0445287	0.400042		537.4	18.4	547.9	13.1	493.6	87.6	544.4	10.9		-1.7	-11.0008
24VG4B	119		85.2765	171.011	0.498662		0.823939	0.0290514	0.0994486	0.00217003	0.0600847	0.0016365	0.249571	0.264661		610.2	16.2	611.2	12.7	605.7	58.9	610.9	11.1		-0.18	-0.90804
24VG4B	120		58.5593	198.102	0.295601		0.799861	0.0256255	0.0958861	0.00210817	0.0605128	0.00147255	0.233041	0.382222		596.8	14.5	590.3	12.4	621	52.5	592.8	10.5		0.93	4.94364
24VG4B	121		50.1208	101.041	0.496043		0.805479	0.0345108	0.0993247	0.00241011	0.0585483	0.00212331	0.20654	0.284424		599.9	19.4	610.5	14.1	549.3	79.2	607.2	12.4		-2	-11.1415
24VG4B	122		70.5837	89.5417	0.788278		0.809943	0.0315495	0.0980257	0.00211367	0.0596492	0.00198279	0.127519	0.335541		602.4	17.7	602.8	12.4	589.9	72.1	602.7	10.7		-0.47	-2.18681
24VG4B	123		18.0782	51.0689	0.353995		0.988309	0.0585204	0.0945798	0.00270005	0.0764095	0.00384201	0.607581	-0.187033		697.9	29.9	582.6	15.9	1104.9	100.5	570.3	16		22	47.2712
24VG4B	124		106.463	280.788	0.37916		0.843821	0.028077	0.0981326	0.00206597	0.0623681	0.00155013	0.169338	0.336538		621.3	15.5	603.5	12.1	685.8	53	609.7	10.3		2.6	12.0006
24VG4B	125		71.239	108.383	0.657287		0.79312	0.0312374	0.0963853	0.00222308	0.0595212	0.00189828	0.297775	0.202933		592.9	17.7	593.2	13.1	585.2	69.2	593.1	11.9		-0.29	-1.36705
24VG4B	126		72.9818	133.159	0.548082		0.818408	0.0295835	0.0995551	0.00207717	0.0596833	0.00169315	0.195826	0.254754		607.2	16.5	611.8	12.2	591.1	61.5	610.3	10.6		-0.65	-3.50195
24VG4B	127		54.093	113.007	0.478668		0.936832	0.0426901	0.0990831	0.00226963	0.0678857	0.00256689	0.175436	0.230795		671.2	22.4	609	13.3	864.1	78.4	621.5	12.4		8.6	29.522
24VG4B	128		12.2198	37.2168	0.328341		0.827344	0.0404815	0.0977573	0.00266741	0.0623253	0.00288821	0.0879706	0.412208		612.1	22.5	601.3	15.7	684.3	98.9	604.6	13.4		2.8	12.1292
24VG4B	129		193.014	1045.77	0.184566		0.856758	0.0240693	0.10205	0.00206696	0.0609733	0.000951632	0.48073	0.284307		628.4	13.2	626.4	12.1	637.3	33.6	627.2	10.8		0.34	1.71034
24VG4B	130		69.1167	130.545	0.529446		0.829985	0.0310969	0.0987736	0.00221792	0.0609457	0.00176608	0.357012	0.116893		613.6	17.3	607.2	13	636.4	62.4	609.1	12		0.93	4.58831
24VG4B	131		75.2714	100.792	0.746802		0.887765	0.0364228	0.104099	0.00228831	0.0614047	0.00206084	0.215036	0.222034		645.2	19.6	638.4	13.4	652.5	72	640.2	12.1		0.4	2.16092
24VG4B	132		43.1766	76.4494	0.564773		0.83156	0.0377903	0.101764	0.00246252	0.0588975	0.00216645	0.31191	0.0976832		614.5	21	624.7	14.4	562.3	80.1	622.2	13.4		-2.1	-11.0973
24VG4B	133		41.4578	69.7553	0.594332		0.837095	0.0352982	0.100648	0.0023118	0.0606017	0.00220011	0.1581	0.237074		617.5	19.5	618.2	13.5	624.2	78.3	618	11.9		0.25	0.96123
24VG4B	134		32.3257	62.8702	0.514165		0.823018	0.0381577	0.0995379	0.00234572	0.0599565	0.00244584	0.166439	0.24804		609.7	21.3	611.7	13.8	601	88.3	611.2	12.4		-0.35	-1.78037
24VG4B	135		74.7444	101.261	0.738138		0.80752	0.0291723	0.0991683	0.00221758	0.0596048	0.00194225	-0.0478314	0.480166		601.1	16.4	609.5	13	588.3	70.7	606.2	9.9		-0.6	-3.6036
24VG4B	136		125.541	262.591	0.478087		0.825148	0.0266497	0.100992	0.00211109	0.0591847	0.00132594	0.288074	0.2502		610.9	14.8	620.2	12.4	572.9	48.7	616.7	10.7		-1.5	-8.25624
24VG4B	137		109.509	245.305	0.446419		0.74006	0.0254673	0.089768	0.00189661	0.0597744	0.00151827	0.281773	0.224422		562.4	14.9	554.2	11.2	594.4	55	556.7	10.1		1.3	6.76312
24VG4B	138		239.598	316.375	0.757322		0.869206	0.0297926	0.103576	0.0024418	0.0606667	0.00139051	0.49484	0.182596		635.1	16.2	635.3	14.3	626.5	49.4	635.3	13		-0.33	-1.40463
24VG4B	139		21.8614	308.615	0.070837		0.991204	0.0414286	0.117493	0.00310255	0.0617044	0.00192286	0.478429	0.122201		699.3	21.1	716.1	17.9	662.9	66.8	710.2	16.4		-1.6	-8.02534
24VG4B	140		80.8093	83.7786	0.964558		0.838588	0.0368963	0.099708	0.00230661	0.0614256	0.00236406	0.196021	0.231478		618.4	20.4	612.7	13.5	653.2	82.6	614.2	12.2		1.4	6.20024
24VG4B	141		64.9877	135.773	0.478651		0.801542	0.0292045	0.0987974	0.00221749	0.0594895	0.00193343	0.00288472	0.47546		597.7	16.5	607.4	13	584.1	70.5	603.6	10.2		-0.66	-3.98904
24VG4B	142		134.833	135.872	0.992355		1.04676	0.0391102	0.120423	0.00282693	0.0631667	0.00191975	0.299717	0.227713		727.3	19.4	733	16.3	712.9	64.6	730.8	14.1		-0.6	-2.81947
24VG4B	143		89.1039	133.892	0.665489		0.842523	0.0377807	0.100612	0.00259463	0.0611823	0.00246162	0.144252	0.104599		620.5	20.8	618	15.2	644.7	86.5	618.8	13.1		0.93	4.14146
24VG4B	144		12.2405	23.0362	0.531356		0.743061	0.0534991	0.0895553	0.00291225	0.0607943	0.00434152	-0.0236435	0.396917		564.2	31.2	552.9	17.2	631	153.8	555.6	15		2.7	12.3772
24VG4B	145		52.4018	75.499	0.694073		0.827155	0.0344844	0.0974201	0.00223197	0.0615831	0.00217245	0.0560142	0.348619		612	19.2	599.3	13.1	658.7	75.6	603.2	11.1		1.9	9.01776
24VG4B	146		185.901	324.932	0.572122		0.830835	0.0270856	0.101683	0.00218446	0.0592189	0.00133862	0.412095	0.260439		614.1	15	624.3	12.8	574.2	49.2	620.5	11.5		-1.6	-8.72518
24VG4B	147		69.4905	105.596	0.658079		0.82895	0.0303977	0.100278	0.0022852	0.0599426	0.00174576	0.212507	0.347369		613	16.9	616	13.4	600.5	63.1	615	11.5		-0.49	-2.58118
24VG4B	148		72.5355	152.383	0.476008		0.749093	0.027572	0.0910612	0.0019811	0.0601817	0.00194596	0.0908374	0.356162		567.7	16	561.8	11.7	609.2	69.9	563.8	9.9		1.6	7.7807
24VG4B	149		245.773	380.979	0.645111		0.81319	0.0284086	0.0990357	0.00227539	0.059371	0.00141931	0.387487	0.102333		604.2	15.9	608.8	13.3	579.8	51.9	607.1	12		-0.94	-5.00172
24VG4B	150		113.892	185.377	0.614382		0.803707	0.0266411	0.0973049	0.00208628	0.0594124	0.00143225	0.229582	0.365091		598.9	15	598.6	12.3	581.2	52.3	598.7	10.5		-0.67	-2.99381
24VG4B	151		57.7418	127.768	0.451926		0.814294	0.0307229	0.099706	0.0022573	0.0595877	0.00186788	0.146986	0.307046		604.9	17.2	612.7	13.2	587.7	68	609.9	11.2		-0.73	-4.25387
24VG4B	152		75.2243	163.385	0.46041		0.812921	0.0302476	0.0990864	0.00228154	0.0596999	0.00172867	0.72234	-0.229931		604.1	16.9	609.1	13.4	591.7	62.8	608.5	13.3		-0.59	-2.94068
24VG4B	153		362.501	411.405	0.88113		0.843263	0.0242779	0.101686	0.00205524	0.0598645	0.00105731	0.408189	0.302817		620.9	13.4	624.3	12	597.7	38.2	622.9	10.6		-0.87	-4.45039
24VG4B	154		105.99	100.058	1.05929		0.851295	0.0310225	0.101275	0.00230697	0.0609491	0.00188105	0.00268676	0.496189		625.4	17	621.9	13.5	636.5	66.4	623.2	10.6		0.44	2.29379
24VG4B	155		76.1724	140.962	0.540376		0.857314	0.0290152	0.0995845	0.00212969	0.0625378	0.00165947	0.13677	0.361295		628.7	15.9	612	12.5	691.6	56.6	618	10.5		2.5	11.5095
24VG4B	156		262.14	400.583	0.654396		0.815959	0.0236645	0.0995124	0.00207526	0.0596385	0.00108424	0.373016	0.311312		605.8	13.2	611.5	12.2	589.5	39.4	609	10.5		-0.64	-3.73198
24VG4B	157		133.132	242.54	0.548906		3.39812	0.117438	0.236033	0.00627289	0.104325	0.0022061	0.664223	0.232912		1504	27.1	1366	32.7	1701.6	38.9	1462.3	29.2		9.1	19.7226
24VG4B	158		130.527	396.233	0.32942		0.837906	0.0268862	0.100216	0.00207184	0.0604534	0.00133881	0.285845	0.275284		618	14.9	615.7	12.1	618.9	47.8	616.5	10.6		0.11	0.517046
24VG4B	159		66.4963	76.7425	0.866486		0.816507	0.0340727	0.100079	0.00230221	0.0590466	0.00209096	0.21041	0.257901		606.1	19	614.9	13.5	567.9	77.1	612.3	12		-1.5	-8.2761
24VG4B	160		62.8617	128.818	0.48799		0.894525	0.0539707	0.100126	0.00309683	0.0647054	0.0033837	0.353067	0.128377		648.8	28.9	615.1	18.1	763.8	110.2	620.8	17.6		5.1	19.4684
24VG4B	161		55.9875	114.211	0.490213		0.852091	0.0296639	0.104067	0.00236036	0.0599956	0.00163273	0.219686	0.365474		625.8	16.3	638.2	13.8	602.5	58.9	633.2	11.5		-1	-5.92531
24VG4B	162		89.922	199.328	0.451125		3.16642	0.219341	0.209973	0.0107718	0.103643	0.00359253	0.959783	-0.824419		1449	53.5	1228.7	57.4	1689.5	63.9	741.2	41.5		73	27.2743
24VG4B	163		97.7436	148.159	0.659721		0.816915	0.0294976	0.0992409	0.00226935	0.059887	0.00173498	0.267115	0.288709		606.3	16.5	610	13.3	598.5	62.7	608.7	11.6		-0.33	-1.92147
UD14	1		66	54	1.22222		0.876	0.034	0.1055	0.0035	0.06021	0.00096	0.15938	0.44215		638.8	18.4	646.6	20.4	610.2	34.5	642.2	14.7		-1.1	-5.96526
UD14	2		47	56	0.839286		0.769	0.03	0.0951	0.0031	0.05887	0.00091	0.20772	0.39928		579.2	17.2	585.6	18.2	561.3	33.7	582.2	13.7		-0.69	-4.32924
UD14	3		76	59	1.28814		0.784	0.031	0.0965	0.0032	0.0591	0.00098	0.29173	0.34718		587.8	17.6	593.9	18.8	569.8	36.1	590.5	14.6		-0.68	-4.22955
UD14	4		79	62	1.27419		0.88	0.034	0.1054	0.0034	0.06091	0.00093	0.25685	0.41764		641	18.4	646	19.8	635.1	32.9	643.2	15.1		-0.34	-1.71627
UD14	5		134	99	1.35354		0.799	0.03	0.098	0.0032	0.0592	0.00079	0.26379	0.43063		596.3	16.9	602.7	18.8	573.5	29	599	14.1		-0.83	-5.09154
UD14	6		200	246	0.813008		0.772	0.03	0.0942	0.003	0.05957	0.00069	0.42522	0.43448		580.9	17.2	580.3	17.7	587	25.1	580.6	14.7		0.22	1.1414
UD14	7		160	141	1.13475		0.859	0.038	0.0912	0.003	0.0686	0.0011	0.35007	0.41326		629.6	20.8	562.6	17.7	885.8	33.1	586.2	16		10	36.4868
UD14	8		26	23	1.13043		0.869	0.039	0.1046	0.0038	0.061	0.0013	0.31424	0.33445		635	21.2	641.3	22.2	638.3	45.8	637.9	17.5		-0.46	-0.469998
UD14	9		305	475	0.642105		0.82	0.03	0.0991	0.0032	0.05992	0.00046	0.60968	0.44004		608	16.7	609.1	18.8	599.7	16.6	608.4	15.8		-0.29	-1.56745
UD14	10		79	83	0.951807		0.771	0.03	0.0933	0.003	0.06016	0.00084	0.31778	0.407		580.3	17.2	575	17.7	608.4	30.2	577.8	14.2		1	5.48981
UD14	11		109	118	0.923729		0.831	0.032	0.1006	0.0033	0.06042	0.00075	0.36143	0.41836		614.2	17.7	617.9	19.3	617.7	26.8	615.8	15.2		-0.34	-0.0323782
UD14	12		77	49	1.57143		0.873	0.036	0.1059	0.0036	0.0601	0.0011	0.14083	0.46196		637.2	19.5	648.9	21	606.2	39.6	642.5	15.2		-1.2	-7.04388
UD14	13		42	75	0.56		0.85	0.033	0.1028	0.0034	0.06036	0.00097	0.19757	0.45729		624.6	18.1	630.8	19.9	615.5	34.7	627.4	14.6		-0.46	-2.48578
UD14	14		119	133	0.894737		0.775	0.03	0.0946	0.0031	0.0597	0.00075	0.3483	0.38871		582.6	17.2	582.7	18.3	591.7	27.2	582.7	14.5		0.34	1.52104
UD14	15		367	402	0.912935		0.887	0.036	0.1056	0.0038	0.06113	0.00066	0.61201	0.42966		644.8	19.4	647.1	22.2	642.8	23.2	645.5	18.4		-0.18	-0.668948
UD14	16		57	46	1.23913		0.733	0.033	0.091	0.0031	0.0588	0.0014	0.17976	0.36589		558.3	19.3	561.4	18.3	558.7	51.9	560	14.4		-0.2	-0.483265
UD14	17		438	168	2.60714		0.883	0.033	0.1067	0.0035	0.06015	0.00067	0.42512	0.42063		642.6	17.8	653.6	20.4	608	24.1	646.8	15.9		-1.3	-7.5
UD14	18		56	46	1.21739		0.863	0.035	0.1047	0.0034	0.0604	0.0011	0.28268	0.3401		631.8	19.1	641.9	19.8	617	39.3	636.5	15.5		-0.73	-4.03566
UD14	19		97	79	1.22785		0.871	0.034	0.104	0.0034	0.061	0.00088	0.25139	0.42894		636.1	18.5	637.8	19.9	638.3	31	636.9	15.1		0.16	0.0783331
UD14	20		147	96	1.53125		0.889	0.034	0.1066	0.0034	0.06065	0.00076	0.31278	0.42132		645.8	18.3	653	19.8	625.9	27	649	15.3		-0.76	-4.32977
UD14	21		67	150	0.446667		0.779	0.029	0.095	0.0031	0.05959	0.00064	0.14619	0.18598		584.9	16.6	585	18.3	587.7	23.3	585	13.1		0.11	0.459418
UD14	22		81	112	0.723214		0.778	0.03	0.0959	0.0032	0.05871	0.00076	0.34731	0.4018		584.3	17.1	590.3	18.8	555.4	28.2	586.9	14.7		-1	-6.28376
UD14	23		52	54	0.962963		0.749	0.03	0.0916	0.003	0.0597	0.001	0.26809	0.37294		567.6	17.4	565	17.7	591.7	36.3	566.3	14		0.87	4.51242
UD14	24		25	37	0.675676		0.73	0.033	0.0904	0.0032	0.0594	0.0014	0.21144	0.40392		556.6	19.4	557.9	18.9	580.8	51.2	557.2	14.9		0.94	3.94284
UD14	25		176	110	1.6		0.842	0.032	0.1014	0.0033	0.06052	0.00075	0.35522	0.36781		620.2	17.6	622.6	19.3	621.2	26.7	621.3	15.1		-0.19	-0.22537
UD14	26		200	169	1.18343		0.78	0.03	0.0964	0.0032	0.05913	0.00059	0.65917	0.23654		585.5	17.1	593.3	18.8	570.9	21.7	588.3	16.2		-0.69	-3.92363
UD14	27		115	78	1.47436		0.91	0.37	0.1065	0.005	0.063	0.011	0.17947	0.18516		657.1	196.7	652.4	29.1	707.3	371.4	652.4	29.1		2.1	7.76191
UD14	28		36	34	1.05882		0.835	0.034	0.1003	0.0033	0.0609	0.0013	0.23568	0.39213		616.4	18.8	616.2	19.3	634.7	45.9	616.3	15		0.69	2.91476
UD14	29		95	106	0.896226		0.877	0.034	0.1062	0.0035	0.06032	0.00062	0.38786	0.38881		639.4	18.4	650.6	20.4	614.1	22.2	644	16		-1	-5.94366
UD14	30		89	74	1.2027		0.858	0.033	0.103	0.0034	0.06077	0.0009	0.3523	0.37161		629	18	632	19.9	630.1	31.9	630.3	15.5		-0.23	-0.301539
UD14	31		87	73	1.19178		0.872	0.034	0.1049	0.0034	0.06087	0.00098	0.077476	0.22933		636.7	18.4	643.1	19.8	633.7	34.7	639.6	14		-0.4	-1.48335
UD14	32		16	31	0.516129		0.897	0.038	0.107	0.0036	0.0616	0.0014	0.1619	0.39809		650.1	20.3	655.3	21	659.3	48.7	652.6	15.7		0.53	0.606704
UD14	33		218	148	1.47297		0.888	0.034	0.1061	0.0034	0.0611	0.00073	0.052466	0.032503		645.3	18.3	650.1	19.8	641.8	25.7	647.5	13.8		-0.3	-1.29324
UD14	34		116	118	0.983051		0.838	0.032	0.1018	0.0033	0.05991	0.00078	0.35432	0.44455		618	17.7	624.9	19.3	599.4	28.2	621	15.1		-0.72	-4.25425
UD14	35		126	85	1.48235		0.853	0.033	0.1029	0.0034	0.06038	0.00086	0.29675	0.37533		626.3	18.1	631.4	19.9	616.2	30.8	628.5	15.2		-0.43	-2.46673
UD14	36		224	109	2.05505		0.889	0.034	0.1073	0.0035	0.06026	0.00067	0.36136	0.34205		645.8	18.3	657	20.4	612	24	650.5	15.8		-1.3	-7.35294
UD14	37		55	67	0.820896		0.78	0.032	0.0964	0.0032	0.0591	0.001	0.25169	0.38486		585.5	18.3	593.3	18.8	569.8	36.8	589.2	14.6		-0.67	-4.12425
UD14	38		12	8	1.5		5.28	0.21	0.348	0.012	0.1114	0.0022	0.35324	0.39749		1865.6	34	1925	57.4	1821.6	35.8	1874.2	32.4		-2.5	-5.67633
UD14	39		129	105	1.22857		0.861	0.033	0.1039	0.0033	0.06049	0.00072	0.37263	0.36843		630.7	18	637.2	19.3	620.2	25.7	633.6	15.4		-0.5	-2.74105
UD14	40		69	59	1.16949		0.773	0.03	0.0964	0.0032	0.05861	0.00081	0.22009	0.40381		581.5	17.2	593.3	18.8	551.7	30.2	586.7	13.9		-1.2	-7.54033
UD14	41		153	150	1.02		1.023	0.038	0.1186	0.0038	0.06264	0.00059	0.43517	0.40459		715.4	19.1	722.5	21.9	695.1	20.1	718.1	17.1		-0.77	-3.94188
UD14	42		83	285	0.291228		0.745	0.028	0.0923	0.003	0.05884	0.00056	0.44982	0.43989		565.3	16.3	569.1	17.7	560.2	20.7	566.9	14.4		-0.3	-1.58872
UD14	43		112	150	0.746667		0.757	0.028	0.0926	0.003	0.05946	0.00066	0.39737	0.44509		572.3	16.2	570.9	17.7	583	24.1	571.7	14.1		0.38	2.07547
UD14	44		37	100	0.37		0.786	0.03	0.0972	0.0031	0.05917	0.00084	0.33469	0.38534		588.9	17.1	598	18.2	572.4	30.9	593	14.3		-0.75	-4.4724
UD14	45		165	307	0.537459		0.73	0.028	0.0908	0.003	0.05842	0.00054	0.66075	0.35362		556.6	16.4	560.3	17.7	544.6	20.2	558	15.4		-0.45	-2.88285
UD14	46		124	232	0.534483		0.879	0.035	0.1055	0.0035	0.06043	0.00069	0.50969	0.34947		640.4	18.9	646.6	20.4	618	24.6	643	17		-0.82	-4.62783
UD14	47		31	30	1.03333		0.836	0.035	0.1016	0.0034	0.0604	0.0014	0.16033	0.40844		616.9	19.4	623.8	19.9	617	50	620.2	14.9		-0.44	-1.10211
UD14	48		276	323	0.854489		2.403	0.09	0.2136	0.007	0.082	0.00062	0.53196	0.55394		1243.5	26.9	1248	37.2	1244.6	14.8	1244.3	26.2		-0.27	-0.27318
UD14	49		108	112	0.964286		0.859	0.032	0.1036	0.0033	0.06047	0.00079	0.29597	0.47928		629.6	17.5	635.5	19.3	619.5	28.2	632.1	14.7		-0.47	-2.58273
UD14	50		100	68	1.47059		0.855	0.04	0.1026	0.0035	0.0612	0.0013	0.24957	0.4804		627.4	21.9	629.6	20.5	645.3	45.6	628.6	16.7		0.71	2.43298
UD14	51		61	66	0.924242		0.87	0.035	0.1053	0.0035	0.0603	0.0011	0.20756	0.38744		635.6	19	645.4	20.4	613.4	39.4	640	15.2		-0.9	-5.21682
UD14	52		335	178	1.88202		0.932	0.038	0.1078	0.0035	0.06315	0.00084	0.48166	0.4162		668.7	20	660	20.4	712.3	28.3	664.5	17.4		1.6	7.34241
UD14	53		24	39	0.615385		0.956	0.039	0.1121	0.0037	0.0624	0.0012	0.30587	0.39129		681.2	20.2	684.9	21.4	686.9	41	682.9	16.8		0.35	0.291163
UD14	54		163	156	1.04487		0.854	0.032	0.1029	0.0034	0.06044	0.00064	0.49759	0.42937		626.8	17.5	631.4	19.9	618.4	22.9	628.5	16		-0.39	-2.1022
UD14	55		41	81	0.506173		0.778	0.03	0.0958	0.0031	0.05931	0.00088	0.29319	0.38442		584.3	17.1	589.7	18.2	577.5	32.2	586.8	14.2		-0.39	-2.11255
UD14	56		142	139	1.02158		0.865	0.033	0.1039	0.0033	0.06082	0.00075	0.40021	0.38252		632.8	18	637.2	19.3	631.9	26.6	634.8	15.5		-0.29	-0.83874
UD14	57		150	101	1.48515		0.901	0.035	0.1078	0.0035	0.06101	0.00096	0.35053	0.38759		652.3	18.7	660	20.4	638.6	33.8	655.6	15.9		-0.61	-3.35108
UD14	58		45	41	1.09756		0.889	0.035	0.1072	0.0035	0.06067	0.00094	0.17512	0.37767		645.8	18.8	656.5	20.4	626.6	33.4	650.6	14.9		-0.85	-4.77178
UD14	59		27	28	0.964286		0.818	0.035	0.0991	0.0033	0.0606	0.0015	0.21324	0.29693		606.9	19.5	609.1	19.4	624.1	53.4	608	15.1		0.7	2.40346
UD14	60		96	397	0.241814		0.79	0.029	0.0961	0.0031	0.05988	0.00049	0.61631	0.41958		591.2	16.5	591.5	18.2	598.3	17.7	591.3	15.5		0.28	1.13655
UD14	61		111	93	1.19355		0.853	0.033	0.1024	0.0033	0.06065	0.00081	0.37133	0.41856		626.3	18.1	628.5	19.3	625.9	28.8	627.3	15.4		-0.14	-0.415402
UD14	62		68	75	0.906667		0.775	0.03	0.0942	0.0031	0.0602	0.0009	0.29738	0.36082		582.6	17.2	580.3	18.3	609.8	32.3	581.6	14.3		0.98	4.83765
UD14	63		303	328	0.92378		0.843	0.033	0.1017	0.0034	0.06042	0.00063	0.47925	0.46545		620.8	18.2	624.4	19.9	617.7	22.5	622.3	16.3		-0.25	-1.08467
UD14	64		44	37	1.18919		0.877	0.036	0.1056	0.0035	0.061	0.0014	0.13794	0.41272		639.4	19.5	647.1	20.4	638.3	49.4	643	15		-0.48	-1.37866
UD14	65		108	183	0.590164		6.05	0.23	0.364	0.012	0.12066	0.00083	0.63677	0.47245		1983.1	33.1	2001.1	56.7	1965.2	12.3	1982.1	32.9		-0.85	-1.82679
UD14	66		140	124	1.12903		0.825	0.031	0.1003	0.0033	0.05977	0.00071	0.07758	0.43877		610.8	17.2	616.2	19.3	594.3	25.7	613.2	13.3		-0.62	-3.68501
UD14	67		167	93	1.7957		0.869	0.033	0.1048	0.0034	0.06065	0.00082	0.29399	0.45249		635	17.9	642.5	19.8	625.9	29.1	638.2	15.1		-0.53	-2.65218
UD14	68		67	339	0.19764		4.74	0.17	0.2882	0.0088	0.11932	0.00093	0.79775	0.16473		1774.3	30.1	1632.5	44	1945.3	13.9	1804.3	30.9		8.2	16.0798
UD14	69		85	186	0.456989		0.859	0.032	0.1042	0.0034	0.06003	0.00067	0.33089	0.48516		629.6	17.5	639	19.8	603.7	24.1	633.4	15		-0.99	-5.84728
UD14	70		153	276	0.554348		0.762	0.028	0.0941	0.003	0.05873	0.00056	0.43071	0.41995		575.2	16.1	579.7	17.7	556.1	20.8	577.1	14.2		-0.68	-4.24384
UD14	71		211	137	1.54015		0.862	0.032	0.1027	0.0033	0.06094	0.00067	0.36232	0.41486		631.2	17.5	630.2	19.3	636.1	23.7	630.8	15.1		0.18	0.927527
UD14	72		177	171	1.03509		0.878	0.033	0.106	0.0034	0.06036	0.0007	0.34426	0.46747		639.9	17.8	649.5	19.8	615.5	25	643.9	15.3		-0.95	-5.52396
UD14	73		344	399	0.862155		0.675	0.025	0.0834	0.0027	0.05872	0.00052	0.59343	0.40534		523.7	15.2	516.4	16.1	555.7	19.3	520.6	14		1.1	7.07216
UD14	74		157	366	0.428962		0.728	0.028	0.0899	0.003	0.05859	0.00059	0.65865	0.35168		555.4	16.5	554.9	17.7	550.9	22	555.2	15.5		-0.18	-0.726085
UD14	75		128	126	1.01587		0.855	0.033	0.1027	0.0033	0.06042	0.00074	0.36583	0.39113		627.4	18.1	630.2	19.3	617.7	26.4	628.7	15.4		-0.36	-2.02364
UD14	76		233	139	1.67626		0.855	0.033	0.1034	0.0033	0.06002	0.00072	0.34126	0.4152		627.4	18.1	634.3	19.3	603.3	26	630.5	15.2		-0.89	-5.13841
UD14	77		34	31	1.09677		0.863	0.036	0.1031	0.0035	0.0613	0.0013	0.23208	0.37326		631.8	19.6	632.6	20.5	648.8	45.5	632.1	15.7		0.66	2.49692
UD14	78		64	40	1.6		0.872	0.036	0.1047	0.0035	0.0615	0.0013	0.15306	0.33501		636.7	19.5	641.9	20.4	655.8	45.3	639.1	15.1		0.88	2.11955
UD14	79		133	164	0.810976		0.735	0.028	0.0903	0.0029	0.05909	0.00062	0.49323	0.33435		559.5	16.4	557.3	17.1	569.4	22.8	558.5	14.5		0.36	2.12504
UD14	80		121	65	1.86154		0.872	0.034	0.1029	0.0034	0.0616	0.001	0.16767	0.2409		636.7	18.4	631.4	19.9	659.3	34.8	634.2	14.6		0.83	4.23176
UD14	81		77	48	1.60417		4.46	0.16	0.3054	0.0095	0.106	0.001	0.50013	0.48406		1723.6	29.8	1718	46.9	1730.9	17.3	1722.9	29.5		0.32	0.745277
UD14	82		51	59	0.864407		0.861	0.034	0.1037	0.0034	0.06038	0.00095	0.26365	0.37338		630.7	18.6	636.1	19.9	616.2	34	633.1	15.2		-0.56	-3.22947
UD14	83		24	106	0.226415		10.97	0.41	0.486	0.016	0.1629	0.0011	0.64006	0.49554		2520.6	34.8	2553.3	69.4	2485.2	11.4	2516.8	34.2		-1.5	-2.74022
UD14	84		322	189	1.7037		0.736	0.028	0.0905	0.0029	0.05896	0.00063	0.50184	0.34757		560.1	16.4	558.5	17.1	564.6	23.3	559.4	14.5		0.17	1.08041
UD14	85		51	35	1.45714		0.884	0.036	0.1057	0.0035	0.061	0.0012	0.20541	0.41467		643.1	19.4	647.7	20.4	638.3	42.3	645.3	15.4		-0.3	-1.47266
UD14	86		26	24	1.08333		0.856	0.037	0.1026	0.0035	0.0616	0.0017	0.11769	0.43108		627.9	20.2	629.6	20.5	659.3	59.2	628.8	15.2		1.2	4.50478
UD14	87		258	188	1.37234		10.34	0.38	0.467	0.015	0.16003	0.00094	0.6817	0.4869		2465.7	34	2470.4	65.9	2455.2	9.9	2465	33.2		-0.41	-0.619094
UD14	88		69	80	0.8625		1.011	0.039	0.1157	0.0037	0.0634	0.00086	0.25619	0.41036		709.4	19.7	705.8	21.4	720.7	28.8	707.8	16.2		0.43	2.06743
UD14	89		4	150	0.0266667		0.869	0.033	0.1039	0.0034	0.06043	0.00067	0.44506	0.36451		635	17.9	637.2	19.9	618	23.9	635.9	15.9		-0.61	-3.1068
UD14	90		226	145	1.55862		0.886	0.033	0.1053	0.0034	0.06092	0.00068	0.32641	0.47012		644.2	17.8	645.4	19.8	635.4	24	644.7	15.2		-0.32	-1.57381
UD14	91		122	284	0.429577		0.777	0.029	0.0954	0.0031	0.05894	0.0005	0.68594	0.33261		583.8	16.6	587.4	18.2	563.9	18.5	585	15.8		-0.69	-4.16741
UD14	92		60	86	0.697674		0.774	0.03	0.0945	0.0031	0.05956	0.00085	0.27639	0.38768		582.1	17.2	582.1	18.3	586.7	31	582.1	14.1		0.17	0.784046
UD14	93		25	20	1.25		0.902	0.041	0.1065	0.0037	0.0623	0.0018	0.1849	0.38244		652.8	21.9	652.4	21.6	683.5	61.7	652.6	16.7		1.2	4.55011
UD14	94		122	94	1.29787		0.738	0.029	0.0903	0.0029	0.05907	0.00087	0.29477	0.43433		561.2	16.9	557.3	17.1	568.7	32.1	559.3	13.7		0.33	2.00457
UD14	95		112	63	1.77778		0.933	0.036	0.1113	0.0036	0.0606	0.00085	0.24148	0.39041		669.2	18.9	680.3	20.9	624.1	30.2	674	15.5		-1.6	-9.00497
UD14	96		21	19	1.10526		0.995	0.043	0.1175	0.004	0.062	0.0016	0.10719	0.41095		701.3	21.9	716.2	23.1	673.1	55.2	708.2	16.6		-1.2	-6.40321
UD14	97		152	80	1.9		1.029	0.039	0.1198	0.0039	0.06232	0.00085	0.30327	0.42842		718.4	19.5	729.4	22.5	684.1	29.1	722.8	16.7		-1.3	-6.62184
UD14	98		107	73	1.46575		0.856	0.033	0.102	0.0033	0.06068	0.00095	0.22167	0.42299		627.9	18.1	626.1	19.3	626.9	33.7	627.1	14.6		0.14	0.127612
UD14	99		28	26	1.07692		0.754	0.033	0.0933	0.0032	0.0595	0.0016	0.12384	0.44733		570.5	19.1	575	18.9	584.5	58.4	572.8	14.2		0.67	1.62532
UD14	100		192	155	1.23871		0.868	0.033	0.103	0.0033	0.06094	0.00073	0.31675	0.41833		634.5	17.9	632	19.3	636.1	25.8	633.4	15.1		0.16	0.644553
UD14	101		209	349	0.598854		0.745	0.028	0.0918	0.003	0.0587	0.0005	0.62439	0.42093		565.3	16.3	566.2	17.7	555	18.6	565.7	15.2		-0.37	-2.01802
UD14	102		65	64	1.01562		0.883	0.034	0.1056	0.0034	0.06076	0.00097	0.28052	0.24184		642.6	18.3	647.1	19.8	629.8	34.4	644.6	15.2		-0.49	-2.7469
UD14	103		60	47	1.2766		4.83	0.18	0.322	0.01	0.1086	0.001	0.37822	0.33468		1790.1	31.3	1799.5	48.8	1775.2	16.8	1791.8	30.1		-0.64	-1.36886
UD14	104		38	390	0.0974359		1.95	0.11	0.1871	0.0079	0.07602	0.00084	0.66735	0.45665		1098.4	37.9	1105.6	42.9	1094.7	22.1	1100.7	36.2		-0.35	-0.995707
UD14	105		169	163	1.03681		0.747	0.028	0.0916	0.0029	0.05904	0.00068	0.38036	0.34702		566.5	16.3	565	17.1	567.6	25.1	565.8	13.9		0.11	0.458069
UD14	106		138	136	1.01471		0.864	0.033	0.1038	0.0034	0.06035	0.0007	0.37762	0.41499		632.3	18	636.6	19.9	615.2	25	634.1	15.6		-0.62	-3.47854
UD14	107		62	85	0.729412		0.762	0.029	0.0938	0.0031	0.05914	0.00086	0.33951	0.39474		575.2	16.7	578	18.3	571.3	31.6	576.4	14.2		-0.22	-1.17276
UD14	108		113	171	0.660819		0.755	0.028	0.0929	0.003	0.0587	0.00062	0.4067	0.36175		571.1	16.2	572.7	17.7	555	23	571.8	14.1		-0.57	-3.18919
UD14	109		122	94	1.29787		0.841	0.033	0.1005	0.0033	0.06076	0.0009	0.27056	0.44369		619.7	18.2	617.3	19.3	629.8	31.9	618.6	14.9		0.37	1.98476
UD14	110		125	106	1.17925		0.883	0.034	0.1051	0.0034	0.0608	0.00077	0.31992	0.43047		642.6	18.3	644.2	19.8	631.2	27.3	643.3	15.4		-0.41	-2.05957
UD14	111		62	46	1.34783		0.859	0.034	0.1035	0.0034	0.0603	0.0011	0.1806	0.41447		629.6	18.6	634.9	19.9	613.4	39.4	632	14.7		-0.61	-3.50505
UD17	1		146	80	1.825		5.67	0.19	0.351	0.012	0.1173	0.0012	0.56869	0.44882		1926.8	28.9	1939.4	57.3	1914.7	18.4	1926.2	28.8		-0.59	-1.29002		x
UD17	2		59	21	2.80952		4.09	0.15	0.296	0.011	0.1018	0.002	0.29541	0.4479		1652.3	29.9	1671.4	54.7	1656.4	36.4	1655	28.8		-0.95	-0.905578		x
UD17	3		48	57	0.842105		1.725	0.065	0.1727	0.0063	0.0727	0.0015	0.36028	0.36557		1017.9	24.2	1027	34.6	1004.7	41.9	1020.1	22.7		-0.61	-2.21957		x
UD17	4		282	328	0.859756		0.544	0.019	0.071	0.0025	0.05568	0.00075	0.42299	0.37458		441.1	12.5	442.2	15	438.6	30	441.4	11.4		-0.13	-0.820793		x
UD17	5		142	332	0.427711		0.962	0.039	0.0921	0.0039	0.07576	0.00086	0.80875	0.26211		684.3	20.2	567.9	23	1087.8	22.8	652.7	23.2		15	47.7937
UD17	6		163	66	2.4697		4.07	0.14	0.293	0.01	0.1011	0.0014	0.0065115	0.068819		1648.3	28	1656.5	49.9	1643.6	25.7	1650.3	24.5		-0.33	-0.784862		x
UD17	7		49	54	0.907407		1.95	0.074	0.1908	0.007	0.0747	0.0014	0.33111	0.33608		1098.4	25.5	1125.7	37.9	1059.5	37.7	1104.5	23.8		-1.8	-6.24823
UD17	8		137	213	0.643192		2.96	0.1	0.2422	0.0085	0.08845	0.00085	0.58055	0.48976		1397.4	25.6	1398.1	44.1	1391.4	18.4	1397.4	25.6		-0.24	-0.481529		x
UD17	9		82	101	0.811881		4.98	0.17	0.332	0.012	0.1088	0.0011	0.57736	0.49233		1815.9	28.9	1848.1	58.1	1778.6	18.4	1814	28.6		-1.7	-3.90757		x
UD17	10		284	320	0.8875		5.17	0.17	0.328	0.011	0.11429	0.00097	0.58358	0.57356		1847.7	28	1828.7	53.4	1867.9	15.3	1848.6	28		0.95	2.09861
UD17	11		131	178	0.735955		4.66	0.16	0.32	0.011	0.10566	0.00096	0.59093	0.50689		1760.1	28.7	1789.7	53.7	1725	16.7	1758.7	28.5		-1.6	-3.75072		x
UD17	12		122	143	0.853147		4.14	0.14	0.3	0.011	0.10009	0.00097	0.60231	0.42952		1662.2	27.7	1691.3	54.5	1624.9	18	1660	27.4		-1.6	-4.08641
UD17	13		34	278	0.122302		1.042	0.037	0.0985	0.0035	0.07707	0.00087	0.72563	0.34907		724.9	18.4	605.6	20.5	1122.1	22.5	677.4	19.9		15	46.0298		x
UD17	14		54	40	1.35		1.802	0.076	0.1752	0.0064	0.0753	0.0024	0.24583	0.44512		1046.2	27.5	1040.7	35.1	1075.6	64	1044.3	24.1		1.1	3.2447
UD17	15		223	83	2.68675		15.2	0.51	0.55	0.019	0.2006	0.0018	0.6103	0.53338		2827.9	32	2825.2	79	2830.4	14.6	2828.2	30.9		0.11	0.18372		x
UD17	16		320	91	3.51648		1.535	0.055	0.1556	0.0055	0.0714	0.0012	0.23998	0.46836		944.5	22	932.3	30.7	968	34.3	940.9	19.8		0.97	3.68802		x
UD17	17		81	127	0.637795		2.633	0.092	0.2256	0.0079	0.08425	0.00096	0.36585	0.22639		1309.9	25.7	1311.4	41.6	1297.5	22.2	1310.2	24.8		-0.5	-1.07129		x
UD17	18		1159	554	2.09206		3.76	0.13	0.2756	0.0096	0.09895	0.00084	0.79258	0.45574		1584.2	27.7	1569.2	48.5	1603.6	15.8	1588.8	26.1		0.99	2.14517
UD17	19		196	201	0.975124		3.9	0.13	0.2853	0.0099	0.09898	0.00094	0.56122	0.46192		1613.7	26.9	1618	49.7	1604.2	17.7	1613.6	26.9		-0.36	-0.860242		x
UD17	20		25	41	0.609756		2.196	0.081	0.2011	0.0071	0.0795	0.0015	0.29173	0.37186		1179.8	25.7	1181.2	38.1	1183.7	37.3	1180.1	23.9		0.2	0.211202
UD17	21		592	309	1.91586		4.01	0.15	0.251	0.0088	0.1164	0.0021	0.22546	0.5321		1636.2	30.4	1443.6	45.3	1900.8	32.4	1579.8	29.4		12	24.053
UD17	22		25	45	0.555556		4.69	0.15	0.313	0.01	0.1089	0.0013	0.54311	0.36789		1765.5	26.8	1755.5	49.1	1780.3	21.8	1765.4	26.8		0.61	1.39302		x
UD17	23		142	65	2.18462		4.15	0.15	0.298	0.011	0.1013	0.0012	0.48473	0.33586		1664.2	29.6	1681.4	54.6	1647.2	22	1664.9	29.4		-0.85	-2.07625		x
UD17	24		72	47	1.53191		1.945	0.072	0.1887	0.0067	0.0748	0.0013	0.28918	0.38386		1096.7	24.8	1114.3	36.3	1062.2	35	1101.1	22.8		-1.4	-4.90491		x
UD17	25		24	89	0.269663		1.875	0.071	0.168	0.006	0.0807	0.0014	0.32163	0.24945		1072.3	25.1	1001.1	33.1	1213.3	34.1	1049.5	23.4		5.9	17.4895
UD17	26		272	485	0.560825		3.03	0.1	0.2425	0.0082	0.0904	0.0011	0.57755	0.58775		1415.2	25.2	1399.7	42.5	1433.1	23.2	1415	25.3		0.9	2.33061		x
UD17	27		86	213	0.403756		1.208	0.088	0.1136	0.0094	0.0762	0.0029	0.47574	0.33994		804.3	40.5	693.6	54.4	1099.4	76.1	775	40.6		12	36.911		x
UD17	28		62	235	0.26383		4.93	0.16	0.332	0.011	0.10647	0.00095	0.61092	0.48565		1807.4	27.4	1848.1	53.2	1739	16.4	1804.2	27.1		-2.6	-6.27372
UD17	29		55	72	0.763889		3.73	0.13	0.2744	0.0096	0.0989	0.0012	0.43581	0.45372		1577.8	27.9	1563.1	48.6	1602.6	22.6	1576.4	27.7		1	2.46474		x
UD17	30		1050	1639	0.640635		0.56	0.023	0.0619	0.0026	0.0653	0.0011	0.32525	0.65757		451.5	15	387.2	15.8	783.1	35.4	420.5	12.8		12	50.5555		x
UD17	31		266	209	1.27273		2.018	0.069	0.19	0.0053	0.0764	0.0047	0.46735	0.57807		1121.6	23.2	1121.4	28.7	1104.7	123	1121.5	21.7		-0.69	-1.51172
UD17	32		229	134	1.70896		4.07	0.14	0.2879	0.0099	0.1025	0.0011	0.46629	0.5319		1648.3	28	1631	49.6	1669	19.8	1647.1	28		0.94	2.27681
UD17	33		178	200	0.89		2.016	0.069	0.1875	0.0065	0.07765	0.00079	0.49676	0.40246		1120.9	23.2	1107.8	35.3	1137	20.2	1119.1	22.9		0.83	2.56816		x
UD17	34		26	20	1.3		1.628	0.091	0.1714	0.0068	0.0704	0.0035	0.11745	0.23354		981.1	35.2	1019.8	37.4	939.1	101.9	998.7	26.7		-2.2	-8.59333		x
UD17	35		566	1248	0.453526		1.442	0.082	0.1206	0.007	0.086	0.0013	0.694	0.44928		906.6	34.1	734	40.3	1337.3	29.2	846.9	38.5		17	45.1133		x
UD17	36		51	32	1.59375		3.08	0.12	0.2449	0.009	0.0919	0.0017	0.49882	0.27475		1427.7	29.9	1412.1	46.6	1464.5	35.1	1425.9	29.6		1.4	3.57801		x
UD17	37		15277	270	56.5815		2.64	0.14	0.1891	0.0098	0.1008	0.0018	0.74765	0.39648		1311.9	39.1	1116.5	53.1	1638.1	33.2	1307.7	44.1		14	31.8418
UD17	38		20	778	0.0257069		1.119	0.038	0.1246	0.0042	0.0646	0.002	0.55901	0.25591		762.5	18.2	757	24.1	760.4	65.3	761.4	17.8		0.52	0.447133
UD17	39		95	288	0.329861		1.905	0.067	0.1837	0.0066	0.07544	0.00081	0.49333	0.49199		1082.8	23.4	1087.2	35.9	1079.3	21.5	1083.4	23		-0.27	-0.731956		x
UD17	40		50	51	0.980392		7.07	0.25	0.39	0.014	0.1312	0.0016	0.45839	0.48623		2120.3	31.5	2122.8	64.9	2113.3	21.4	2120.3	31.4		-0.29	-0.449534		x
UD17	41		153	138	1.1087		1.7	0.051	0.1622	0.0049	0.0761	0.0011	0.39389	0.46022		1008.5	19.2	969	27.2	1096.8	28.9	999	18.4		3.5	11.6521		x
UD17	42		63	84	0.75		1.781	0.063	0.1767	0.0062	0.0733	0.001	0.3915	0.41257		1038.5	23	1048.9	34	1021.3	27.6	1040.7	21.9		-0.74	-2.70244
UD17	43		247	121	2.04132		4.38	0.15	0.303	0.01	0.1048	0.0013	0.043576	0.14348		1708.6	28.3	1706.2	49.5	1710	22.8	1708	25		0.094	0.222222		x
UD17	44		87	66	1.31818		4.13	0.14	0.29	0.01	0.104	0.0014	0.44498	0.4501		1660.3	27.7	1641.5	50	1695.9	24.8	1658.8	27.6		1.4	3.20774
UD17	45		93	123	0.756098		0.545	0.022	0.0712	0.0026	0.0563	0.0013	0.2385	0.36037		441.7	14.5	443.4	15.6	463.2	51.2	442.5	11.8		0.86	4.27461
UD17	46		151	186	0.811828		2.993	0.099	0.2398	0.0081	0.09052	0.00092	0.58096	0.42737		1405.8	25.2	1385.7	42.1	1435.7	19.4	1405.5	25.3		1.3	3.48262		x
UD17	47		133	60	2.21667		1.597	0.059	0.1621	0.0058	0.0715	0.0012	0.26055	0.37862		969	23.1	968.4	32.2	970.8	34.2	968.9	20.9		0.068	0.247219		x
UD17	48		201	305	0.659016		2.147	0.073	0.1966	0.0068	0.07925	0.00075	0.46289	0.47178		1164.1	23.6	1157	36.6	1177.5	18.7	1163.1	23.1		0.54	1.74098		x
UD17	49		113	335	0.337313		4.11	0.14	0.275	0.01	0.1081	0.001	0.79216	0.39354		1656.3	27.8	1566.1	50.6	1766.8	16.9	1684.5	25.6		5.8	11.3595		x
UD17	50		9	272	0.0330882		1.142	0.039	0.1255	0.0043	0.0659	0.00078	0.42238	0.39679		773.5	18.5	762.1	24.6	802.3	24.8	770.4	17.5		1.1	5.01059		x
UD17	51		455	436	1.04358		1.545	0.078	0.0918	0.0065	0.1212	0.0017	0.71898	0.18939		948.5	31.1	566.2	38.4	1973.2	25	767.7	48.9		44	71.3055
UD17	52		349	907	0.384785		1.601	0.057	0.142	0.0051	0.08102	0.00073	0.57675	0.52065		970.6	22.3	856	28.8	1221	17.7	941.6	23		10	29.8935
UD17	53		99	374	0.264706		0.547	0.02	0.0711	0.0025	0.05585	0.00096	0.32498	0.4023		443	13.1	442.8	15	445.4	38.2	442.9	11.4		0.081	0.583745
UD17	54		79	57	1.38596		3.99	0.15	0.286	0.011	0.1023	0.0013	0.92345	0.24107		1632.2	30.5	1621.5	55.1	1665.4	23.5	1639.8	21.8		1.1	2.636		x
UD17	55		149	119	1.2521		4.04	0.14	0.289	0.01	0.1015	0.0011	0.08206	0.078886		1642.3	28.2	1636.5	50	1650.9	20.1	1641	25.4		0.38	0.872251		x
UD17	56		44	101	0.435644		3.23	0.1	0.2539	0.0082	0.092	0.0016	0.58097	0.34683		1464.4	24	1458.6	42.2	1466.5	33	1464.4	24		0.33	0.538698		x
UD17	57		83	56	1.48214		5.36	0.19	0.34	0.012	0.1142	0.0014	0.44061	0.50517		1878.5	30.3	1886.7	57.7	1866.5	22.1	1878.9	30.2		-0.5	-1.08224
UD17	58		164	155	1.05806		2.672	0.071	0.2236	0.0059	0.0858	0.0012	0.37395	0.52419		1320.7	19.6	1300.9	31.1	1332.8	27.1	1317.2	19		0.98	2.39346		x
UD17	59		257	322	0.798137		2.956	0.097	0.2398	0.0082	0.08909	0.00083	0.58667	0.5792		1396.4	24.9	1385.7	42.6	1405.2	17.8	1396.4	25		0.61	1.3877
UD17	60		25	38	0.657895		1.648	0.064	0.1656	0.0059	0.0724	0.0017	0.20469	0.35384		988.8	24.5	987.8	32.6	996.3	47.7	988.5	21.4		0.29	0.853157		x
UD17	61		64	162	0.395062		1.142	0.04	0.1281	0.0045	0.06478	0.00091	0.34607	0.40583		773.5	19	777	25.7	766.3	29.6	774.4	17.5		-0.3	-1.39632		x
UD17	62		135	139	0.971223		3.52	0.12	0.2698	0.0093	0.0944	0.0011	0.50142	0.50062		1531.7	27	1539.8	47.2	1515.3	22	1532.1	26.8		-0.64	-1.61684
UD17	63		55	85	0.647059		3.5	0.12	0.2694	0.0095	0.094	0.0012	0.46241	0.45099		1527.2	27.1	1537.8	48.2	1507.3	24.1	1527.9	26.8		-0.79	-2.02349		x
UD17	64		69	73	0.945205		4.14	0.15	0.294	0.011	0.1022	0.0012	0.77472	0.11729		1662.2	29.6	1661.5	54.8	1663.6	21.7	1662.4	27.8		0.053	0.126232		x
UD17	65		109	158	0.689873		2.123	0.073	0.1954	0.0067	0.0789	0.00097	0.54166	0.45316		1156.3	23.7	1150.6	36.1	1168.7	24.3	1155.7	23.6		0.48	1.54873
UD17	66		63	75	0.84		3.13	0.11	0.2505	0.0088	0.091	0.0011	0.45555	0.42421		1440.1	27	1441.1	45.4	1445.7	23	1440.2	26.7		0.27	0.318185
UD17	67		32	215	0.148837		1.544	0.053	0.1578	0.0054	0.07092	0.0008	0.40391	0.45342		948.1	21.2	944.5	30.1	954.2	23.1	947.3	20.1		0.27	1.01656
UD17	68		33	45	0.733333		1.584	0.062	0.1606	0.0058	0.072	0.0016	0.27159	0.34179		963.9	24.4	960.1	32.2	985	45.2	962.7	21.8		0.8	2.52792
UD17	69		604	757	0.797886		1.024	0.034	0.1049	0.0036	0.07069	0.00069	0.5849	0.47822		715.9	17.1	643.1	21	947.5	20	694.9	17.1		8.7	32.1266		x
UD17	70		151	178	0.848315		4.03	0.14	0.2826	0.0096	0.10338	0.00092	0.75278	0.23205		1640.3	28.3	1604.4	48.3	1684.8	16.4	1647.9	27.5		2.2	4.77208
UD17	71		239	230	1.03913		3.41	0.12	0.2636	0.0092	0.09357	0.00084	0.67889	0.36673		1506.7	27.6	1508.2	46.9	1498.6	17	1506.6	27.4		-0.31	-0.640598		x
UD17	72		184	180	1.02222		0.544	0.018	0.071	0.0023	0.05587	0.00078	0.37414	0.25375		441.1	11.8	442.2	13.8	446.2	31	441.5	10.5		0.27	0.896459		x
UD17	73		174	535	0.325234		1.815	0.068	0.1772	0.0067	0.07387	0.00069	0.92075	0.0029415		1050.9	24.5	1051.7	36.7	1037	18.9	1050.3	20.6		-0.49	-1.41755
UD17	74		160	237	0.675105		1.813	0.063	0.1778	0.0063	0.07413	0.00076	0.63015	0.33177		1050.2	22.7	1054.9	34.5	1044.1	20.7	1050.3	22.7		-0.34	-1.03438		x
UD17	75		455	332	1.37048		3.5	0.12	0.267	0.0097	0.09491	0.00089	0.75824	0.39741		1527.2	27.1	1525.6	49.4	1525.4	17.7	1527.6	25.8		-0.19	-0.0131113
UD17	76		39	776	0.0502577		3.71	0.12	0.2727	0.0092	0.09809	0.00082	0.63375	0.49212		1573.5	25.9	1554.5	46.6	1587.3	15.6	1574.9	25.8		1	2.0664
UD17	77		405	347	1.16715		0.547	0.021	0.0708	0.0026	0.05609	0.00095	0.19443	0.34125		443	13.8	441	15.7	454.9	37.6	442.2	11.3		0.41	3.05562
UD17	78		41	55	0.745455		2.87	0.1	0.2372	0.0085	0.0887	0.0014	0.3909	0.32337		1374.1	26.2	1372.1	44.3	1396.8	30.3	1373.8	25.6		0.93	1.76833		x
UD17	79		68	70	0.971429		0.54	0.024	0.071	0.0026	0.0557	0.0018	0.11119	0.34809		438.4	15.8	442.2	15.6	439.4	71.9	440.3	11.7		-0.34	-0.637233		x
UD17	80		303	319	0.949843		1.88	0.064	0.1854	0.0064	0.07343	0.00069	0.4934	0.4789		1074.1	22.6	1096.4	34.8	1024.9	19	1076.9	22.1		-1.9	-6.97629		x
UD17	81		182	334	0.54491		3.5	0.13	0.267	0.01	0.09435	0.00083	0.70162	0.38581		1527.2	29.3	1525.6	50.9	1514.3	16.6	1527.4	28.9		-0.63	-0.746219
UD17	82		166	233	0.712446		4.25	0.15	0.305	0.011	0.10061	0.00095	0.58857	0.4476		1683.7	29	1716.1	54.3	1634.6	17.5	1682.3	28.8		-2	-4.98593		x
UD17	83		12	26	0.461538		2.197	0.087	0.2017	0.0073	0.0791	0.0018	0.1864	0.42483		1180.1	27.6	1184.4	39.2	1173.7	45	1181.4	24.4		-0.28	-0.911647		x
UD17	84		198	230	0.86087		3.72	0.12	0.2729	0.0094	0.09848	0.00093	0.52351	0.50849		1575.7	25.8	1555.5	47.6	1594.7	17.6	1575.4	25.9		1	2.45814		x
UD17	85		20	40	0.5		4.46	0.16	0.2609	0.0091	0.1233	0.0024	0.40965	0.18763		1723.6	29.8	1494.4	46.5	2003.7	34.6	1676.5	31.2		13	25.418
UD17	86		15	25	0.6		1.628	0.07	0.1664	0.0061	0.072	0.0021	0.15741	0.36867		981.1	27	992.2	33.7	985	59.4	985.2	22.6		-0.62	-0.730964
UD17	87		132	202	0.653465		1.769	0.061	0.1767	0.0061	0.0726	0.00079	0.42771	0.49047		1034.2	22.4	1048.9	33.4	1001.9	22.1	1036.8	21.5		-1.3	-4.69109
UD17	88		190	204	0.931373		4.67	0.16	0.317	0.011	0.10602	0.00097	0.54973	0.45724		1761.9	28.7	1775.1	53.8	1731.2	16.8	1761.7	28.6		-1.2	-2.53581
UD17	89		73	60	1.21667		3.92	0.14	0.287	0.01	0.0991	0.0013	0.40455	0.4445		1617.8	28.9	1626.5	50.1	1606.4	24.5	1618.8	28.3		-0.5	-1.25125
UD17	90		52	138	0.376812		0.95	0.14	0.0937	0.0066	0.074	0.0065	0.53816	0.23385		678.1	72.9	577.4	38.9	1040.6	177.3	573.3	39.4		19	44.5128
UD17	91		38	45	0.844444		1.675	0.06	0.1626	0.0056	0.0755	0.0016	0.26075	0.37848		999.1	22.8	971.2	31.1	1080.9	42.5	990.6	20.6		3.2	10.1489
UD17	92		47	57	0.824561		3.26	0.11	0.254	0.0088	0.0932	0.0012	0.41864	0.30746		1471.6	26.2	1459.1	45.2	1491.1	24.4	1470.2	25.9		0.82	2.14607
UD17	93		47	63	0.746032		3.27	0.11	0.2569	0.009	0.0925	0.0013	0.42233	0.44244		1473.9	26.2	1474	46.2	1476.8	26.7	1473.9	25.8		0.12	0.189599
UD17	94		207	144	1.4375		1.914	0.07	0.184	0.0069	0.0755	0.00088	0.53746	0.40529		1086	24.4	1088.8	37.6	1080.9	23.4	1086.3	24.2		-0.21	-0.730872
UD17	95		92	62	1.48387		0.908	0.036	0.1047	0.0037	0.063	0.0015	0.19115	0.34764		656	19.2	641.9	21.6	707.3	50.6	649.9	15.7		1.9	9.24643
UD17	96		177	171	1.03509		3.4	0.12	0.2624	0.0094	0.0938	0.00094	0.52898	0.48875		1504.4	27.7	1502.1	48	1503.2	18.9	1504.3	27.7		0.16	0.0731772
UD17	97		93	284	0.327465		3.81	0.13	0.283	0.01	0.09776	0.00092	0.65477	0.47585		1594.9	27.4	1606.5	50.2	1581	17.6	1593.7	27.1		-0.66	-1.6129
UD17	98		106	176	0.602273		2.18	0.075	0.1999	0.007	0.07896	0.00087	0.44271	0.48651		1174.7	23.9	1174.8	37.6	1170.2	21.8	1174.7	23.4		-0.18	-0.393095
UD17	99		36	57	0.631579		2.283	0.084	0.2071	0.0075	0.0806	0.0014	0.42458	0.34878		1207	26	1213.3	40.1	1210.8	34.2	1208.1	25.2		-0.46	-0.206475
UD17	100		205	77	2.66234		13.48	0.46	0.529	0.019	0.1847	0.0018	0.59342	0.5028		2713.9	32.3	2737.2	80.1	2694.8	16.1	2711.3	31.4		-0.89	-1.5734
UD17	101		75	98	0.765306		4.65	0.16	0.323	0.011	0.1045	0.0011	0.54466	0.49921		1758.3	28.8	1804.4	53.6	1704.7	19.4	1757.9	28.5		-2.4	-5.84854
UD17	102		37	31	1.19355		4.41	0.16	0.309	0.011	0.1037	0.0017	0.39341	0.41303		1714.2	30	1735.8	54.2	1690.5	30.2	1716.4	29.4		-1.1	-2.67968
UD17	103		132	87	1.51724		4.28	0.15	0.303	0.011	0.1019	0.0011	0.46188	0.51032		1689.5	28.8	1706.2	54.4	1658.2	20	1690.3	28.7		-1.2	-2.89471
UD17	104		20	20	1		1.52	0.072	0.155	0.0058	0.0719	0.0025	0.15584	0.33129		938.5	29	928.9	32.4	982.2	70.8	934.3	23.3		1.7	5.42659
UD17	105		24	319	0.0752351		0.547	0.019	0.0711	0.0025	0.05589	0.0008	0.35015	0.41286		443	12.5	442.8	15	447	31.8	442.9	11.1		0.14	0.939597
UD17	106		47	33	1.42424		1.948	0.077	0.189	0.007	0.076	0.0017	0.099289	0.42024		1097.8	26.5	1116	38	1094.2	44.8	1103.4	22.6		-0.88	-1.99232
UD17	107		92	93	0.989247		6.53	0.22	0.375	0.013	0.1263	0.0013	0.5485	0.49756		2050	29.7	2052.9	60.9	2046.3	18.2	2049.8	29.6		-0.15	-0.322533
UD17	108		61	49	1.2449		1.635	0.062	0.1666	0.006	0.0717	0.0015	0.32301	0.38651		983.8	23.9	993.4	33.2	976.5	42.6	986.4	22		-0.54	-1.73067
UD17	109		89	88	1.01136		3.42	0.12	0.2647	0.0093	0.0934	0.0011	0.42019	0.50061		1509	27.6	1513.8	47.4	1495.2	22.3	1509.5	27.1		-0.54	-1.24398
UD17	110		162	248	0.653226		3	0.12	0.2391	0.0082	0.0902	0.0015	0.01973	0.13624		1407.6	30.5	1382	42.7	1428.9	31.7	1399	25.2		1.2	3.28225
UD17	111		354	152	2.32895		1.689	0.055	0.1666	0.0055	0.07298	0.00085	0.49013	0.36278		1004.4	20.8	993.4	30.4	1012.5	23.6	1002.5	20.4		0.7	1.88642
UD17	112		87	26	3.34615		1.64	0.075	0.171	0.0065	0.0702	0.0024	0.13745	0.38777		985.7	28.8	1017.6	35.8	933.3	70.1	997.6	23.7		-2.3	-9.03247
UD17	113		144	112	1.28571		1.953	0.068	0.1872	0.0066	0.07564	0.00098	0.41389	0.47626		1099.5	23.4	1106.2	35.8	1084.7	26	1100.7	22.6		-0.58	-1.98211
UD17	114		49	68	0.720588		0.654	0.029	0.0843	0.0031	0.0571	0.0018	0.20152	0.25137		510.9	17.8	521.7	18.4	494.4	69.5	516.1	14		-0.87	-5.52184
UD17	115		41	38	1.07895		1.815	0.07	0.1807	0.0065	0.073	0.0016	0.21631	0.4077		1050.9	25.2	1070.8	35.5	1013	44.4	1056.7	22.4		-1.6	-5.70582
UD17	116		110	96	1.14583		1.663	0.059	0.1667	0.0059	0.0729	0.0011	0.28508	0.43706		994.5	22.5	993.9	32.6	1010.3	30.6	994.4	20.7		0.62	1.62328
UD17	117		60	60	1		1.652	0.061	0.1692	0.006	0.0715	0.0014	0.12562	0.34579		990.3	23.4	1007.7	33.1	970.8	39.9	995.7	20.1		-1	-3.80099
UD17	118		142	102	1.39216		5.18	0.18	0.328	0.012	0.1146	0.0012	0.52078	0.46591		1849.3	29.6	1828.7	58.3	1872.8	18.9	1849.5	29.7		1.1	2.35476
UD17	119		18	102	0.176471		1.694	0.06	0.1665	0.0059	0.074	0.0011	0.30269	0.45286		1006.3	22.6	992.8	32.6	1040.6	30	1002.8	21		1.3	4.5935
UD17	120		51	23	2.21739		3.26	0.14	0.2603	0.0099	0.0925	0.0026	0.024759	0.037978		1471.6	33.4	1491.4	50.6	1476.8	53.3	1477.4	28		-0.85	-0.988624
UD17	121		331	613	0.539967		0.553	0.02	0.0716	0.0026	0.05547	0.00083	0.50313	0.39921		447	13.1	445.8	15.6	430.2	33.3	446.6	12.2		-0.69	-3.62622
UD17	122		110	75	1.46667		3.55	0.12	0.268	0.0095	0.0959	0.0012	0.45663	0.5069		1538.4	26.8	1530.6	48.3	1545	23.5	1537.9	26.7		0.39	0.932039
UD52	1		76	90	0.844444		0.831159	0.0310544	0.0987264	0.00150964	0.0621597	0.0023496	0.0742521	0.304877		614.3	17.2	606.9	8.9	678.7	80.8	608.3	8.1		2.6	10.579		x
UD52	2		29	51	0.568627		0.813174	0.0317628	0.0979044	0.0020253	0.0619061	0.00255004	0.00838047	0.460369		604.2	17.8	602.1	11.9	669.9	88.2	602.8	9.9		2.5	10.1209		x
UD52	3		87	87	1		0.835155	0.0255709	0.0989113	0.00132722	0.0628957	0.0020291	0.103174	0.349089		616.5	14.1	608	7.8	703.8	68.7	609.8	7.1		3.5	13.6118
UD52	4		146	301	0.48505		0.812588	0.0168112	0.0971282	0.00131466	0.062652	0.00131224	0.262368	0.396767		603.9	9.4	597.6	7.7	695.5	44.6	599.9	6.7		3.5	14.0762
UD52	5		106	133	0.796992		0.803278	0.0206963	0.096855	0.00121457	0.062139	0.00189484	-0.0135458	0.436919		598.7	11.7	596	7.1	677.9	65.2	596.7	6.1		3	12.0814
UD52	6		107	141	0.758865		0.803362	0.0254914	0.0964436	0.00144646	0.0620988	0.0019267	0.264714	0.216959		598.7	14.4	593.5	8.5	676.6	66.3	594.5	8.1		3	12.282
UD52	7		17	266	0.0639098		0.794439	0.0157479	0.0958555	0.00114558	0.0613834	0.00131797	0.0617053	0.467637		593.7	8.9	590.1	6.7	651.7	46.1	591.4	5.5		2.2	9.4522
UD52	8		105	134	0.783582		0.824883	0.0239625	0.0987781	0.00125748	0.0616924	0.00187928	0.153322	0.288363		610.8	13.3	607.2	7.4	662.5	65.3	607.9	6.8		2	8.34717
UD52	9		48	79	0.607595		0.831572	0.0289851	0.0978094	0.00159791	0.0622945	0.00229588	0.0502016	0.374723		614.5	16.1	601.6	9.4	683.3	78.7	604.7	8.3		2.8	11.9567
UD52	10		25	29	0.862069		0.809551	0.0462045	0.0966169	0.00236367	0.0613977	0.00389257	-0.0876637	0.491658		602.2	25.9	594.6	13.9	652.2	136.1	596.4	11.8		2	8.83165
UD52	11		358	826	0.433414		0.829126	0.0149081	0.0981938	0.00116103	0.0607685	0.00109071	0.292711	0.398076		613.1	8.3	603.8	6.8	630.1	38.7	607.2	6		0.75	4.17394
UD52	12		190	179	1.06145		0.824203	0.0248577	0.0975597	0.00155341	0.0608442	0.00193933	0.180993	0.372863		610.4	13.8	600.1	9.1	632.8	68.6	602.8	8.2		1	5.16751
UD52	13		72	138	0.521739		0.80937	0.0264777	0.0979166	0.00160753	0.0588448	0.00214843	-0.0098955	0.466735		602.1	14.9	602.2	9.4	560.4	79.6	602.2	7.9		-1.6	-7.45896
UD52	14		130	125	1.04		0.809972	0.027377	0.0973608	0.00127156	0.0586804	0.00196898	0.12523	0.259999		602.4	15.4	598.9	7.5	554.3	73.2	599.5	7		-1.7	-8.04618
UD52	15		68	84	0.809524		0.798182	0.029802	0.0973386	0.00150343	0.0577863	0.00231288	0.058922	0.35024		595.8	16.8	598.8	8.8	520.7	87.8	598.2	8		-2.9	-14.999
UD52	16		133	124	1.07258		0.812778	0.0263112	0.0983042	0.00159079	0.0582065	0.00207076	0.0398792	0.411869		604	14.7	604.5	9.3	536.5	77.9	604.3	8		-2.5	-12.6747
UD52	17		257	447	0.574944		0.802743	0.0135007	0.0966178	0.000836841	0.0572832	0.000941301	0.313683	0.235689		598.4	7.6	594.6	4.9	501.5	36.2	595.4	4.6		-3.6	-18.5643
UD52	18		23	69	0.333333		0.813668	0.0279064	0.0961822	0.00148013	0.0582677	0.00201554	0.212271	0.310498		604.5	15.6	592	8.7	538.9	75.7	594.2	8.2		-2.2	-9.85341		x
UD52	19		91	101	0.90099		0.812135	0.0253819	0.0979897	0.001473	0.0574329	0.00194015	0.0180177	0.443765		603.7	14.2	602.6	8.6	507.2	74.3	602.9	7.4		-3.6	-18.8091
UD52	20		61	99	0.616162		0.819493	0.0254979	0.0978091	0.00141168	0.0578495	0.00191387	0.057832	0.356293		607.8	14.2	601.6	8.3	523.1	72.6	603	7.3		-3.1	-15.0067
UD52	21		31	46	0.673913		0.816026	0.0353723	0.0968172	0.0018237	0.0587978	0.00273864	0.0674781	0.355517		605.8	19.8	595.7	10.7	558.6	101.6	597.8	9.7		-1.6	-6.6416
UD52	22		122	128	0.953125		0.794768	0.0243501	0.097585	0.00137746	0.0561052	0.00182404	0.0804808	0.336827		593.9	13.8	600.2	8.1	455.5	72.1	598.7	7.2		-5.2	-31.7673
UD52	23		48	104	0.461538		0.834289	0.0348934	0.0980589	0.00214785	0.0582916	0.00235378	0.293417	0.236945		616	19.3	603	12.6	539.8	88.3	605.9	11.8		-2.7	-11.708
UD52	24		81	194	0.417526		0.810596	0.0198809	0.0987202	0.0012673	0.0573496	0.00155336	0.0756463	0.418358		602.8	11.1	606.9	7.4	504	59.6	605.7	6.4		-3.7	-20.4167
UD52	25		41	86	0.476744		0.830316	0.0323766	0.09846	0.00159644	0.0624977	0.00261459	0.03313	0.373982		613.8	18	605.4	9.4	690.2	89.2	607.1	8.4		3	12.2863
UD52	26		42	74	0.567568		0.877241	0.0387351	0.0951725	0.00206219	0.068428	0.00299758	0.190115	0.281941		639.5	21	586.1	12.1	880.6	90.6	596.1	11.4		10	33.4431
UD52	27		136	169	0.804734		0.843952	0.0228479	0.10103	0.00137793	0.0630381	0.00180328	0.149991	0.361588		621.3	12.6	620.4	8.1	708.6	60.8	620.7	7.2		3.3	12.4471
UD52	28		56	82	0.682927		0.816278	0.0280447	0.0990047	0.00169253	0.0624331	0.00223651	0.197313	0.306424		606	15.7	608.6	9.9	688	76.5	607.9	9.1		3.1	11.5407
UD52	29		91	99	0.919192		0.826979	0.024433	0.0980772	0.00151873	0.0641515	0.00208327	0.00644157	0.427111		611.9	13.6	603.1	8.9	745.7	68.6	605.8	7.5		5.2	19.123
UD52	30		53	71	0.746479		0.83283	0.0363814	0.0998128	0.00183991	0.0634556	0.00295221	0.100423	0.317845		615.2	20.2	613.3	10.8	722.6	98.7	613.7	9.9		4.1	15.1259
UD52	31		47	70	0.671429		0.89586	0.0315634	0.0994346	0.00161623	0.0689742	0.00271794	0.0555337	0.40576		649.5	16.9	611.1	9.5	897	81.3	619.4	8.5		10	31.8729
UD52	32		53	68	0.779412		0.844712	0.0352412	0.0981697	0.00176575	0.0656392	0.00291662	0.0214032	0.368728		621.7	19.4	603.7	10.4	793.9	93.2	607.5	9.3		6.9	23.9577
UD52	33		37	95	0.389474		0.971489	0.031834	0.0912537	0.00169913	0.0816631	0.00343001	-0.112473	0.559279		689.2	16.4	562.9	10	1236.6	82.4	596.9	8.4		23	54.48
UD52	34		32	60	0.533333		0.823382	0.0364774	0.0974034	0.00173807	0.0635939	0.0029233	-0.018081	0.414636		609.9	20.3	599.2	10.2	727.2	97.4	601.4	9.1		4.6	17.6018
UD52	35		63	90	0.7		1.30909	0.0420186	0.0870746	0.00157358	0.114066	0.0042295	0.0496805	0.454861		849.7	18.5	538.2	9.3	1864.4	66.9	579.1	9		51	71.1328		x
UD52	36		100	116	0.862069		0.840354	0.0250275	0.0998145	0.00133522	0.0628939	0.0019461	0.112804	0.3247		619.3	13.8	613.3	7.8	703.7	65.8	614.6	7.1		3.3	12.8464
UD52	37		79	160	0.49375		0.83619	0.024307	0.0997758	0.00135483	0.0624753	0.00186212	0.1925	0.257051		617	13.4	613.1	7.9	689.4	63.6	613.9	7.4		2.8	11.0676
UD52	38		36	71	0.507042		0.996949	0.039007	0.112848	0.00218076	0.064991	0.00268419	0.154315	0.319467		702.3	19.8	689.3	12.6	773.1	86.9	692.5	11.4		2.9	10.8395
UD52	39		29	56	0.517857		0.847359	0.0303845	0.0967873	0.00177837	0.0651986	0.00260762	0.0440383	0.408234		623.2	16.7	595.6	10.5	779.8	84.1	602.9	9.1		6.3	23.6214
UD52	40		68	87	0.781609		0.837946	0.0291796	0.0932453	0.00160588	0.066208	0.00256478	0.0205363	0.447109		618	16.1	574.7	9.5	812	81	585.2	8.3		8	29.2241
UD52	41		57	85	0.670588		0.802453	0.0260594	0.0976854	0.00146997	0.0602078	0.00216993	0.122546	0.320851		598.2	14.7	600.8	8.6	610.1	77.9	600.2	7.8		0.42	1.52434
UD52	42		109	219	0.497717		0.838384	0.0203261	0.0997398	0.00113146	0.0610589	0.00149837	0.215516	0.246908		618.3	11.2	612.9	6.6	640.3	52.8	614	6.2		0.93	4.27924
UD52	43		52	74	0.702703		0.81763	0.0306672	0.0999232	0.00162017	0.0593424	0.00234436	0.0972158	0.311028		606.7	17.1	614	9.5	578.7	85.8	612.4	8.6		-1.2	-6.09988
UD52	44		49	67	0.731343		0.822279	0.0347942	0.0985472	0.00172464	0.0597139	0.0024303	0.162911	0.283328		609.3	19.4	605.9	10.1	592.3	88.2	606.5	9.5		-0.58	-2.29613		x
UD52	45		195	233	0.83691		0.831086	0.0203825	0.0985174	0.00126347	0.0605151	0.00151411	0.229641	0.318776		614.2	11.3	605.7	7.4	621.1	54	607.8	6.8		0.44	2.47947
UD52	46		46	70	0.657143		0.825875	0.0293176	0.09747	0.00159152	0.0604878	0.00221504	0.127363	0.324829		611.3	16.3	599.6	9.4	620.1	79	602.1	8.6		0.59	3.30592		x
UD52	47		63	116	0.543103		0.824243	0.0243559	0.100341	0.00155565	0.0581228	0.00177937	0.122518	0.354582		610.4	13.6	616.4	9.1	533.4	67	614.7	8		-2.9	-15.5606
UD52	48		42	60	0.7		0.811565	0.0317263	0.0979549	0.00161692	0.0583889	0.00243025	-0.0337258	0.465934		603.3	17.8	602.4	9.5	543.4	91	602.6	8.3		-2.2	-10.8576
UD52	49		187	418	0.447368		0.839559	0.0139873	0.0994876	0.000969869	0.0596799	0.00095796	0.321253	0.287993		618.9	7.7	611.4	5.7	591	34.8	613.5	5.2		-1	-3.45178
UD52	50		63	115	0.547826		0.843642	0.0264221	0.100692	0.00156242	0.0610128	0.00203111	0.124517	0.325139		621.2	14.6	618.5	9.1	638.7	71.6	619.1	8.2		0.7	3.16267
UD52	51		29	56	0.517857		0.805639	0.03789	0.0984247	0.00184714	0.0587771	0.00276146	0.0646146	0.342471		600	21.3	605.2	10.8	557.9	102.4	604.2	9.9		-1.7	-8.47822
UD52	52		70	62	1.12903		0.810277	0.0307785	0.0979366	0.00162992	0.0608357	0.0025283	0.054888	0.335123		602.6	17.3	602.3	9.6	632.5	89.5	602.4	8.6		1.1	4.7747
UD52	53		61	158	0.386076		0.817794	0.0206117	0.0966894	0.00119509	0.0608607	0.00144182	0.227249	0.288138		606.8	11.5	595	7	633.4	51	597.5	6.6		1.2	6.06252
UD52	54		88	163	0.539877		0.818369	0.0218557	0.0981048	0.00125876	0.0608048	0.00182465	0.0456331	0.363177		607.1	12.2	603.3	7.4	631.4	64.6	604.3	6.5		0.96	4.45043
UD52	55		43	92	0.467391		0.825641	0.0257349	0.0974915	0.00132872	0.0613723	0.00201909	0.0798536	0.339686		611.2	14.3	599.7	7.8	651.3	70.6	602.1	7.1		1.7	7.92262		x
UD52	56		17	63	0.269841		1.36013	0.0622947	0.0959814	0.00179182	0.103306	0.00465175	0.285051	0.109196		871.9	26.8	590.8	10.5	1683.5	83.1	592.2	10.7		45	64.9064
UD52	57		45	71	0.633803		0.71023	0.0286298	0.0890132	0.00137356	0.0580886	0.0024556	0.0948185	0.307654		544.9	17	549.7	8.1	532.1	92.6	548.9	7.6		-0.58	-3.30765		x
UD52	58		62	84	0.738095		0.822779	0.031839	0.0995067	0.00163735	0.0605978	0.00253524	-0.0325157	0.365356		609.6	17.7	611.5	9.6	624	90.2	611.1	8.3		0.52	2.00321
UD52	59		18	29	0.62069		0.814426	0.0484322	0.0992056	0.00253541	0.0614314	0.00388842	0.151097	0.281708		604.9	27.1	609.8	14.9	653.4	135.8	608.8	13.8		1.8	6.67279
UD52	60		69	106	0.650943		0.817113	0.0269243	0.0967942	0.00167931	0.0618128	0.00210173	0.223852	0.304888		606.4	15	595.6	9.9	666.7	72.8	598.3	9		2.4	10.6645
UD52	61		122	247	0.493927		0.728089	0.0185456	0.0887724	0.00104358	0.0595489	0.0016732	0.053336	0.405626		555.4	10.9	548.3	6.2	586.3	61	549.9	5.5		1.3	6.48132
UD52	62		163	230	0.708696		0.774668	0.0383619	0.0906369	0.00239993	0.061621	0.00293759	0.33829	0.22458		582.4	21.9	559.3	14.2	660	102.2	563.8	13.6		3.3	15.2576
UD52	63		49	78	0.628205		0.973786	0.0368139	0.0979502	0.00185346	0.0726917	0.00289391	0.152793	0.33731		690.4	18.9	602.4	10.9	1004.5	80.8	618.8	10.2		14	40.0299
UD52	64		50	74	0.675676		0.824542	0.031628	0.098855	0.00158351	0.0611644	0.00256347	0.0579919	0.350112		610.6	17.6	607.7	9.3	644	90.1	608.3	8.4		1.3	5.63665
UD52	65		81	145	0.558621		0.840576	0.025427	0.101916	0.00136322	0.0599806	0.00182082	0.248788	0.137694		619.5	14	625.6	8	601.9	65.7	624.5	7.6		-0.79	-3.93753
UD52	66		68	103	0.660194		0.818197	0.0279995	0.100136	0.00150003	0.0592189	0.00206942	0.184331	0.228438		607	15.6	615.2	8.8	574.2	76	613.6	8.2		-1.4	-7.14037
UD52	67		53	75	0.706667		0.855899	0.0293904	0.0997909	0.00170236	0.0629611	0.00230006	0.15535	0.291161		627.9	16.1	613.2	10	706	77.7	616.7	9.1		3.2	13.1445
UD52	68		98	95	1.03158		0.841344	0.0272781	0.0997835	0.00159099	0.0608938	0.00204602	0.0663307	0.406763		619.9	15	613.1	9.3	634.5	72.3	614.9	8.2		0.66	3.37273		x
UD52	69		151	252	0.599206		0.815389	0.0174675	0.0979053	0.00123893	0.0603286	0.0012832	0.296012	0.303687		605.5	9.8	602.1	7.3	614.4	45.9	603.1	6.6		0.38	2.00195
UD52	70		53	91	0.582418		0.844905	0.0389568	0.0987825	0.00200501	0.0619688	0.00288709	0.12848	0.32114		621.8	21.4	607.3	11.8	672.1	99.7	610.1	10.9		2.2	9.64142
UD52	71		12	40	0.3		0.820525	0.0379736	0.0990245	0.0022844	0.0616198	0.00345653	-0.103359	0.552783		608.3	21.2	608.7	13.4	660	120.3	608.6	10.8		2	7.77273
UD52	72		141	159	0.886792		0.810885	0.0228084	0.097834	0.00130368	0.060302	0.00181193	0.139166	0.366506		603	12.8	601.7	7.7	613.5	64.9	602	6.9		0.41	1.92339
UD52	73		67	127	0.527559		0.84896	0.0244822	0.0993289	0.00135715	0.0617706	0.0018486	0.0669146	0.377843		624.1	13.4	610.5	8	665.2	64.1	613.8	7.1		1.8	8.22309
UD52	74		144	276	0.521739		0.839743	0.0292735	0.0991628	0.00203688	0.0610169	0.0020782	0.333501	0.248977		619	16.2	609.5	11.9	638.9	73.3	612.2	11		0.89	4.60166
UD52	75		49	88	0.556818		0.818103	0.0296497	0.0990215	0.00147065	0.0600268	0.00225145	0.0614336	0.307683		607	16.6	608.7	8.6	603.6	81.1	608.3	7.8		-0.16	-0.84493
UD52	76		36	55	0.654545		0.840551	0.033339	0.100758	0.00192302	0.0613937	0.00271587	0.0277785	0.435809		619.4	18.4	618.8	11.3	652.1	95	619	9.7		1.2	5.10658
UD52	77		68	108	0.62963		0.820312	0.0259731	0.0996764	0.0016144	0.0608772	0.00209563	0.107496	0.354291		608.2	14.5	612.5	9.5	633.9	74.1	611.3	8.3		0.95	3.37593
UD52	78		60	125	0.48		0.797373	0.0237165	0.0981555	0.00154425	0.060479	0.00202035	0.0409297	0.397074		595.3	13.4	603.6	9.1	619.8	72.1	601	7.6		0.94	2.61375		x
UD52	79		100	272	0.367647		0.84977	0.0201461	0.100935	0.0015318	0.0622102	0.00154451	0.223144	0.370186		624.5	11.1	619.9	9	680.4	53.1	621.6	7.7		2.1	8.89183
UD52	80		31	39	0.794872		0.864901	0.0421109	0.0989855	0.00237462	0.0662904	0.0033425	0.141144	0.328542		632.8	22.9	608.5	13.9	814.6	105.4	614.1	12.7		7.3	25.3008		x
UD52	81		56	82	0.682927		0.83767	0.029425	0.0995425	0.00156184	0.0637923	0.00235128	0.158762	0.311859		617.9	16.3	611.7	9.2	733.8	78	612.9	8.5		4.5	16.6394
UD52	82		98	127	0.771654		0.843202	0.0257466	0.0993248	0.00150522	0.064487	0.00220017	0.0455064	0.429553		620.9	14.2	610.5	8.8	756.7	72	613.2	7.7		5.3	19.3207
UD52	83		30	59	0.508475		0.80264	0.0364729	0.099252	0.0019146	0.0617066	0.00284674	0.0441709	0.35352		598.3	20.5	610	11.2	663	98.8	607.4	10		2.3	7.99397
UD52	84		33	61	0.540984		0.824112	0.0371363	0.0967126	0.00181799	0.0659068	0.00314478	0.129216	0.331439		610.3	20.7	595.1	10.7	802.5	99.9	597.8	10		7.7	25.8442		x
UD52	85		58	108	0.537037		0.839481	0.0253087	0.098907	0.00162963	0.0649486	0.0019466	0.148034	0.342992		618.9	14	608	9.6	771.7	63.1	611.1	8.4		5.9	21.2129
UD52	86		115	188	0.611702		0.827784	0.0209485	0.0998475	0.00125447	0.0639718	0.00171746	0.137404	0.355402		612.4	11.6	613.5	7.3	739.8	56.8	613.2	6.6		4.9	17.0722		x
UD52	87		111	313	0.354633		0.815951	0.0258858	0.100668	0.00140637	0.0623318	0.00205762	0.132138	0.286623		605.8	14.5	618.3	8.2	684.6	70.5	615.6	7.5		2.8	9.68449
UD52	88		97	119	0.815126		0.82941	0.0266466	0.0991364	0.00166437	0.0658543	0.00206157	0.235019	0.269015		613.3	14.8	609.3	9.8	800.8	65.6	610.3	9		7.2	23.9136
UD52	89		113	207	0.545894		0.745998	0.0252019	0.0926971	0.00156593	0.0635175	0.00207083	0.23615	0.266096		565.9	14.7	571.5	9.2	724.7	69.2	570.2	8.5		6	21.1398
UD52	90		51	80	0.6375		0.813707	0.0285204	0.0999538	0.00178699	0.0650055	0.00245349	0.057443	0.396995		604.5	16	614.1	10.5	773.6	79.4	611.3	9		6.4	20.6179
UD52	91		124	187	0.663102		0.793528	0.0194647	0.0968456	0.00128331	0.0651698	0.00174815	0.0659061	0.417471		593.2	11	595.9	7.5	778.9	56.4	595.1	6.4		7.1	23.4947
UD52	92		33	64	0.515625		0.818191	0.0337584	0.101896	0.00162205	0.0642592	0.00276711	-0.0177531	0.323713		607	18.9	625.5	9.5	749.2	91	621.6	8.4		5.2	16.5109		x
UD52	93		68	132	0.515152		0.838947	0.0295117	0.100396	0.00185584	0.0666282	0.00248753	0.10175	0.36778		618.6	16.3	616.7	10.9	825.2	77.9	617.3	9.5		8	25.2666
UD52	94		227	434	0.523041		0.827812	0.0142021	0.0998861	0.000992282	0.0659691	0.00114568	0.256056	0.308028		612.4	7.9	613.7	5.8	804.5	36.4	613.3	5.2		7.4	23.7166
UD52	95		50	86	0.581395		0.840842	0.034917	0.0999825	0.00193355	0.0673007	0.00295067	0.0737184	0.391297		619.6	19.3	614.3	11.3	846.2	91.2	615.6	10.1		8.8	27.4049
UD52	96		300	231	1.2987		0.897006	0.0195174	0.106021	0.0013635	0.0678362	0.00174218	0.121282	0.417552		650.1	10.4	649.6	7.9	862.6	53.3	649.8	6.7		8.2	24.6928
UD52	97		104	184	0.565217		0.837723	0.0207342	0.101229	0.00123963	0.0653929	0.0015731	0.226177	0.267493		617.9	11.5	621.6	7.3	786.1	50.5	620.7	6.7		6.4	20.9261
UD52	98		47	58	0.810345		0.837713	0.0427702	0.0974042	0.00217884	0.0679546	0.00405057	-0.0552621	0.450478		617.9	23.6	599.2	12.8	866.2	123.6	603.6	11		9.8	30.8243
UD52	99		76	120	0.633333		0.842719	0.0263989	0.0996751	0.0017102	0.0650634	0.00236658	0.0738518	0.4197		620.6	14.5	612.5	10	775.4	76.5	615	8.6		6	21.0085
UD52	100		144	220	0.654545		1.61159	0.0464841	0.105507	0.0014881	0.106686	0.00327456	0.0942092	0.364254		974.7	18.1	646.6	8.7	1742.7	56.2	680	8.5		42	62.8967
UD52	101		16	38	0.421053		1.06647	0.0548543	0.120022	0.00271872	0.0612504	0.00333018	0.00833366	0.383354		737	27	730.7	15.6	647.1	116.8	732.3	13.6		-3.4	-12.9192
UD52	102		69	124	0.556452		0.805583	0.0266104	0.0984619	0.00159991	0.0553362	0.00179917	0.258592	0.203365		600	15	605.4	9.4	424.8	72.5	604.2	8.8		-6.6	-42.5141
UD52	103		71	102	0.696078		0.81753	0.030057	0.0995754	0.00182498	0.0556088	0.00221547	0.133974	0.359544		606.7	16.8	611.9	10.7	435.8	88.7	610.5	9.5		-6.4	-40.4084
UD52	104		95	124	0.766129		0.836237	0.0252151	0.0995215	0.00149497	0.0561553	0.00172117	0.195567	0.31859		617.1	13.9	611.6	8.8	457.5	68	612.9	8		-5.9	-33.6831
UD52	105		76	172	0.44186		0.828293	0.023511	0.0987905	0.00137439	0.056174	0.00178769	0.0309576	0.426321		612.7	13.1	607.3	8.1	458.3	70.6	608.7	7		-5.7	-32.5115
UD52	106		39	85	0.458824		0.817682	0.0284793	0.0988559	0.00175999	0.0549125	0.00202438	0.0508502	0.405644		606.8	15.9	607.7	10.3	407.7	82.5	607.4	8.9		-7.4	-49.0557
UD52	107		48	85	0.564706		0.844431	0.0316103	0.097702	0.00165452	0.057739	0.00225136	0.180721	0.264088		621.6	17.4	600.9	9.7	518.9	85.6	604.7	9.1		-3.5	-15.8027
UD52	108		26	77	0.337662		0.84463	0.0330175	0.0985413	0.00163974	0.0569489	0.00229848	0.166678	0.26639		621.7	18.2	605.9	9.6	488.6	89	608.5	9.1		-4.7	-24.0074
UD52	109		56	71	0.788732		0.818372	0.0364009	0.0999376	0.00183975	0.0545258	0.00251614	0.0879733	0.274696		607.1	20.3	614	10.8	391.8	103.5	612.7	9.8		-8.1	-56.7126
UD52	110		86	110	0.781818		0.809481	0.0295749	0.10014	0.00177126	0.0534387	0.0019955	0.157476	0.279977		602.2	16.6	615.2	10.4	346.5	84.5	612	9.3		-9.6	-77.5469
UD52	111		67	437	0.153318		0.829063	0.0152662	0.0999325	0.00106235	0.0549423	0.0010775	0.22116	0.366057		613.1	8.5	614	6.2	408.9	43.9	613.7	5.5		-7.6	-50.159
UD52	112		76	210	0.361905		0.812253	0.0176963	0.09811	0.00115946	0.0547375	0.00130714	0.0629944	0.451204		603.7	9.9	603.3	6.8	400.5	53.5	603.4	5.8		-7.5	-50.6367
UD52	113		95	173	0.549133		0.940782	0.023799	0.107795	0.00137863	0.0579505	0.00147176	0.246619	0.236963		673.3	12.5	659.9	8	526.9	55.7	663	7.5		-5.3	-25.242
UD52	114		46	92	0.5		0.834186	0.0318372	0.10073	0.00172581	0.0556059	0.00232166	-0.00660743	0.391834		615.9	17.6	618.7	10.1	435.7	93	618	8.7		-6.7	-42.0014
UD52	115		137	387	0.354005		0.814406	0.0161515	0.0998089	0.0012617	0.0544302	0.00111436	0.205211	0.383951		604.9	9	613.3	7.4	387.9	46	610.1	6.3		-8	-58.1078
UD52	116		65	99	0.656566		0.827131	0.0275335	0.0974189	0.00162898	0.0574845	0.00213002	0.0331753	0.394039		612	15.3	599.3	9.6	509.2	81.5	602.7	8.3		-3.8	-17.6944
UD52	117		62	98	0.632653		0.822981	0.029503	0.0997884	0.00183962	0.0554682	0.00212771	0.0573943	0.451143		609.7	16.4	613.2	10.8	430.1	85.5	612.2	9.2		-6.7	-42.5715
UD52	118		95	250	0.38		0.825693	0.019157	0.100138	0.00128507	0.0557158	0.00129577	0.27896	0.278081		611.2	10.7	615.2	7.5	440.1	51.8	614.1	6.9		-6.4	-39.7864
UD52	119		26	50	0.52		0.866158	0.0381802	0.100722	0.00204767	0.0589523	0.00281487	0.0185578	0.390369		633.5	20.8	618.6	12	564.3	104	622.2	10.5		-2.5	-9.62254
UD52	120		105	170	0.617647		0.831303	0.0234071	0.0995454	0.00136491	0.057317	0.0017927	0.0895089	0.381744		614.3	13	611.7	8	502.8	68.9	612.4	7.1		-4.2	-21.6587
UD52	121		59	94	0.62766		0.831173	0.0271477	0.0984489	0.00149614	0.0574141	0.00204491	0.0232282	0.38417		614.3	15.1	605.3	8.8	506.5	78.3	607.5	7.7		-3.9	-19.5064
UD52	122		182	223	0.816143		0.772965	0.0249108	0.0946322	0.00163853	0.056241	0.0019458	0.162942	0.346723		581.5	14.3	582.9	9.7	460.9	76.7	582.5	8.6		-4.5	-26.47
UD52	123		67	96	0.697917		0.817199	0.0281745	0.100977	0.00151408	0.0563481	0.00204855	0.150992	0.323675		606.5	15.7	620.1	8.9	465.1	80.6	617.3	8.2		-5.5	-33.3262
UD52	124		266	291	0.914089		0.845469	0.018632	0.0999605	0.00113892	0.0589572	0.00136335	0.212812	0.295228		622.2	10.3	614.2	6.7	564.5	50.4	616.1	6.1		-2.1	-8.80425
UD52	125		159	285	0.557895		0.815974	0.0267372	0.0991251	0.00200264	0.0601236	0.00186748	0.404161	0.243323		605.8	14.9	609.3	11.7	607.1	67.2	608.2	10.8		-0.13	-0.362379
UD52	126		95	100	0.95		0.846958	0.0266941	0.0999414	0.00162798	0.0612474	0.0019649	0.211399	0.316238		623	14.7	614.1	9.5	647	68.9	616.3	8.7		1	5.08501		x
UD52	127		133	386	0.34456		0.831228	0.0155773	0.100707	0.00109617	0.0595371	0.00110384	0.3318	0.220273		614.3	8.6	618.6	6.4	585.8	40.2	617.3	5.9		-1.1	-5.59918
UD52	128		36	41	0.878049		0.821109	0.0426127	0.096972	0.00246742	0.0628949	0.00351963	0.0740971	0.408171		608.7	23.8	596.6	14.5	703.7	119.1	599.7	12.8		3.8	15.2196
UD52	129		21	43	0.488372		0.826014	0.0456792	0.0988316	0.00241266	0.0608563	0.0035198	0.171338	0.317615		611.4	25.4	607.6	14.2	633.2	124.5	608.3	13.2		0.89	4.04296
UD52	130		51	104	0.490385		0.812706	0.0301129	0.0958522	0.00156149	0.0618754	0.00238498	0.132988	0.284625		604	16.9	590.1	9.2	668.8	82.5	592.7	8.5		2.7	11.7673
UD52	131		96	226	0.424779		0.879071	0.0211107	0.102925	0.00116047	0.0614428	0.0014882	0.202149	0.290491		640.5	11.4	631.5	6.8	653.8	52	633.4	6.3		0.69	3.41083
UD52	132		132	348	0.37931		0.841582	0.0161142	0.0975853	0.000962401	0.0617878	0.0012335	0.159444	0.314126		620	8.9	600.2	5.7	665.8	42.7	605.1	5.1		2	9.85281
UD52	133		88	71	1.23944		0.922364	0.0377753	0.106707	0.00202228	0.0619852	0.00269147	0.0376294	0.4627		663.6	20	653.6	11.8	672.6	92.9	656.1	10.3		0.55	2.82486
UD52	134		50	68	0.735294		0.798312	0.0360934	0.0934951	0.00167103	0.0623333	0.00297907	0.127926	0.256414		595.9	20.4	576.2	9.9	684.6	102	579.1	9.3		3.8	15.8341
UD52	135		52	70	0.742857		0.855022	0.0311074	0.101465	0.00175077	0.0610498	0.00232881	0.113264	0.379278		627.4	17	623	10.2	640	82	624	9.2		0.55	2.65625
UD52	136		40	80	0.5		0.856674	0.0337874	0.101526	0.00177501	0.0603406	0.00237872	0.122475	0.366616		628.3	18.5	623.3	10.4	614.9	85.1	624.4	9.5		-0.45	-1.36608
UD52	137		74	136	0.544118		0.816495	0.0251964	0.0987512	0.00124277	0.0598817	0.00199332	-0.0380833	0.423754		606.1	14.1	607.1	7.3	598.3	72.1	606.9	6.4		-0.31	-1.47083
UD52	138		53	103	0.514563		0.845011	0.0283173	0.098897	0.00159375	0.0618442	0.00215552	0.106043	0.362129		621.9	15.6	607.9	9.4	667.8	74.6	611.2	8.4		2	8.96975
UD52	139		42	72	0.583333		0.851164	0.0347513	0.0979267	0.00185684	0.063751	0.00281403	0.0730456	0.327945		625.3	19.1	602.2	10.9	732.4	93.5	607.4	9.8		4.4	17.7772
UD52	140		62	110	0.563636		0.865779	0.0313485	0.103508	0.00175581	0.061489	0.00220891	0.334866	0.154904		633.3	17.1	634.9	10.3	655.4	77.1	634.7	9.9		0.81	3.12786
UD52	141		114	133	0.857143		0.824883	0.0370231	0.0993113	0.00214984	0.0612117	0.00299725	0.0428846	0.416028		610.8	20.6	610.4	12.6	645.7	105.2	610.5	11		1.3	5.46694
UD52	21b		70	145	0.482759		0.823068	0.0212024	0.0979484	0.00141194	0.057996	0.0015723	0.193581	0.380743		609.8	11.8	602.4	8.3	528.6	59.4	604.5	7.4		-3	-13.9614
UD53	1		122	126	0.968254		0.827991	0.0664287	0.100081	0.00225753	0.0602247	0.00247175	0.278818	0.177787		612.5	36.9	614.9	13.2	610.7	88.7	614.8	13.2		-0.15	-0.687735
UD53	2		92	277	0.33213		0.755689	0.0593356	0.0914959	0.0020037	0.0597462	0.00216264	0.285472	0.213556		571.5	34.3	564.4	11.8	593.4	78.5	564.5	11.8		1.1	4.88709
UD53	3		75	345	0.217391		0.744622	0.057438	0.0918412	0.00216565	0.0587496	0.00197359	0.350605	0.305827		565.1	33.4	566.4	12.8	556.9	73.3	566.4	12.8		-0.36	-1.70587
UD53	4		50	224	0.223214		0.746462	0.0582705	0.0921058	0.00217626	0.0588889	0.00211712	0.293319	0.22546		566.2	33.9	568	12.8	562	78.3	567.9	12.8		-0.22	-1.06762
UD53	5		63	477	0.132075		0.747314	0.0559078	0.0904788	0.00194483	0.0598117	0.00171931	0.489456	0.289832		566.7	32.5	558.4	11.5	595.8	62.3	557.8	11.4		1.5	6.27727		x
UD53	6		66	104	0.634615		2.67157	0.203937	0.22844	0.00532479	0.0848072	0.00260735	0.300909	0.432855		1320.6	56.4	1326.3	27.9	1310.3	59.7	1325.7	27.4		-0.63	-1.22109		x
UD53	7		133	202	0.658416		0.736288	0.0578712	0.090129	0.0022142	0.0590669	0.00215908	0.333239	0.288162		560.2	33.8	556.3	13.1	568.6	79.6	556.4	13.1		0.45	2.16321
UD53	8		43	59	0.728814		0.867234	0.0740092	0.101274	0.00290702	0.0626348	0.00331557	0.363562	0.132451		634.1	40.2	621.9	17	694.9	112.8	622.2	17		2.7	10.5051
UD53	9		140	192	0.729167		0.858432	0.0664354	0.102864	0.00256107	0.0606295	0.00203099	0.333301	0.397646		629.3	36.3	631.2	15	625.1	72.2	631.1	14.9		-0.22	-0.975844
UD53	10		62	170	0.364706		0.764124	0.0601224	0.0945186	0.00219775	0.0583296	0.00214314	0.255019	0.311348		576.4	34.6	582.2	12.9	541.2	80.3	581.9	12.8		-1.5	-7.57576		x
UD53	11		90	196	0.459184		0.871725	0.0674313	0.102314	0.00241034	0.0614155	0.00208704	0.370807	0.245354		636.5	36.6	628	14.1	652.9	72.9	628	14.1		0.94	3.81375		x
UD53	12		20	113	0.176991		0.791985	0.0641045	0.0955463	0.00226799	0.0601714	0.00247233	0.186174	0.280902		592.3	36.3	588.3	13.3	608.8	88.8	588.5	13.1		0.74	3.36728
UD53	13		121	163	0.742331		0.910156	0.0708872	0.109781	0.00260274	0.0598777	0.00197796	0.206101	0.420316		657.1	37.7	671.5	15.1	598.2	71.5	670.3	14.8		-2.7	-12.2534
UD53	15		71	156	0.455128		0.758234	0.0599294	0.0916117	0.00227245	0.0600644	0.00222199	0.256309	0.313571		573	34.6	565.1	13.4	604.9	80	565.5	13.3		1.5	6.5796
UD53	16		44	378	0.116402		0.730046	0.0570681	0.0903182	0.00216134	0.0581177	0.00195146	0.182156	0.430579		556.6	33.5	557.4	12.8	533.2	73.5	557.4	12.5		-0.9	-4.53863
UD53	17		70	335	0.208955		0.754368	0.0607565	0.0941974	0.00242748	0.0576962	0.00222485	0.20302	0.37304		570.8	35.2	580.3	14.3	517.2	84.7	579.5	14		-2.3	-12.2003
UD53	18		29	43	0.674419		0.796219	0.0716519	0.0984754	0.00285749	0.0590385	0.0033778	0.21471	0.180166		594.7	40.5	605.5	16.8	567.6	124.6	604.5	16.4		-1.3	-6.67724
UD53	19		48	65	0.738462		0.873723	0.0751468	0.103788	0.00291497	0.0616193	0.00322192	0.372193	0.0674015		637.6	40.7	636.6	17	659.9	112.1	636.6	17		0.89	3.53084		x
UD53	20		59	202	0.292079		0.764762	0.0615027	0.0938948	0.00242516	0.0588383	0.0022518	0.17204	0.447187		576.8	35.4	578.5	14.3	560.1	83.4	578.4	13.9		-0.67	-3.28513
UD53	21		75	179	0.418994		0.757672	0.0609899	0.0924904	0.0028779	0.0590931	0.00253432	0.403273	0.322424		572.7	35.2	570.2	17	569.5	93.3	570.4	16.9		-0.041	-0.122915
UD53	22		145	200	0.725		0.745649	0.0582811	0.0917843	0.00223834	0.0591964	0.00209804	0.275367	0.346461		565.7	33.9	566.1	13.2	573.3	77.1	566.1	13.1		0.27	1.25589		x
UD53	23		137	166	0.825301		0.82548	0.0643015	0.101312	0.0023307	0.0594236	0.00220279	0.37836	0.13155		611.1	35.8	622.1	13.6	581.7	80.5	622.1	13.6		-1.5	-6.94516
UD53	24		73	289	0.252595		0.762242	0.0593301	0.0914878	0.00212433	0.0602096	0.00207253	0.24776	0.355086		575.3	34.2	564.3	12.5	610.2	74.4	564.8	12.5		1.7	7.52212
UD53	25		29	136	0.213235		0.826728	0.0680846	0.0989353	0.00259035	0.0607476	0.00263863	0.126408	0.32621		611.8	37.8	608.2	15.2	629.4	93.6	608.5	14.6		0.76	3.36829
UD53	26		59	151	0.390728		0.830701	0.0663745	0.100313	0.00256659	0.059976	0.00224183	0.193522	0.424814		614	36.8	616.2	15	601.7	80.9	616	14.7		-0.53	-2.40984		x
UD53	27		33	100	0.33		0.747215	0.0605426	0.092273	0.00245499	0.0591426	0.00253984	0.364887	0.156189		566.6	35.2	569	14.5	571.4	93.4	568.9	14.5		0.097	0.420021
UD53	28		78	287	0.271777		0.830409	0.0669333	0.101807	0.00278375	0.0590961	0.00238964	0.358784	0.321394		613.8	37.1	625	16.3	569.7	88	624.5	16.2		-2	-9.70686
UD53	29		225	391	0.575448		0.881446	0.0701777	0.104409	0.00294172	0.0611324	0.00226116	0.269485	0.46519		641.8	37.9	640.2	17.2	642.9	79.5	640.3	16.9		0.09	0.419972
UD53	30		58	219	0.26484		0.768993	0.0603186	0.093057	0.00255743	0.0605979	0.00234616	0.459254	0.298043		579.2	34.6	573.6	15.1	624	83.5	573.5	15.1		1.9	8.07692
UD53	31		54	85	0.635294		0.82573	0.0669374	0.101071	0.00262711	0.059939	0.0026291	0.306453	0.206805		611.2	37.2	620.7	15.4	600.4	95	620.2	15.3		-0.72	-3.38108
UD53	32		49	90	0.544444		0.763129	0.0619654	0.0933977	0.00243847	0.0593816	0.00246038	0.224775	0.29895		575.8	35.7	575.6	14.4	580.2	90	575.6	14.1		0.17	0.79283		x
UD53	33		31	53	0.584906		0.872484	0.0739637	0.103934	0.00287576	0.0609432	0.00305052	0.32898	0.176403		636.9	40.1	637.4	16.8	636.3	107.7	637.4	16.7		-0.042	-0.172874
UD53	34		46	127	0.362205		0.724207	0.0598631	0.0908364	0.00219529	0.0581435	0.00264349	0.285504	0.134434		553.1	35.3	560.5	13	534.2	99.5	560.2	12.9		-0.96	-4.92325
UD53	35		103	172	0.598837		0.742655	0.0586963	0.089963	0.00217864	0.0602532	0.00247781	0.446579	0.0783429		564	34.2	555.3	12.9	611.7	88.9	555	12.9		2.2	9.22021		x
UD53	36		45	102	0.441176		0.819326	0.0650837	0.100489	0.0024678	0.059721	0.00245352	0.401504	0.143528		607.7	36.3	617.3	14.5	592.5	89.1	617.3	14.4		-0.93	-4.18565
UD53	37		138	193	0.715026		0.750778	0.0583401	0.0921424	0.00206144	0.0589518	0.00207778	0.32305	0.209986		568.7	33.8	568.2	12.2	564.3	76.8	568.2	12.2		-0.15	-0.691122
UD53	38		46	174	0.264368		0.742109	0.0587369	0.0921262	0.00226036	0.0586894	0.00218849	0.17954	0.381869		563.6	34.2	568.1	13.3	554.6	81.3	567.7	13		-0.47	-2.43419
UD53	39		130	430	0.302326		0.770184	0.0588249	0.0929951	0.00219201	0.0599971	0.00198492	0.404137	0.32606		579.9	33.7	573.2	12.9	602.5	71.6	573.2	12.9		1.1	4.86307
UD53	40		54	206	0.262136		0.772865	0.0597832	0.0943281	0.00223027	0.0598136	0.00209945	0.346793	0.241755		581.4	34.2	581.1	13.1	595.9	76	581.1	13.1		0.56	2.48364
UD53	41		114	231	0.493506		0.741202	0.057424	0.0896811	0.00199895	0.0598128	0.00209941	0.342331	0.181181		563.1	33.5	553.7	11.8	595.8	76	553.7	11.8		1.6	7.06613
UD53	42		47	244	0.192623		0.743379	0.0574848	0.0908422	0.00207111	0.0596333	0.00202793	0.240525	0.323962		564.4	33.5	560.5	12.2	589.3	73.8	560.7	12.1		1.1	4.88715
UD53	43		59	186	0.317204		0.74814	0.0635285	0.0909524	0.00264178	0.0598412	0.00298313	0.303362	0.193019		567.1	36.9	561.2	15.6	596.9	108	561.5	15.5		1.3	5.9809
UD53	44		74	225	0.328889		0.742015	0.0577394	0.0912634	0.00220903	0.059319	0.00199855	0.266509	0.360334		563.6	33.7	563	13	577.8	73.2	563	12.9		0.55	2.56144
UD53	45		53	368	0.144022		0.738934	0.0576027	0.0907704	0.00199442	0.0589542	0.00205935	0.210445	0.27277		561.8	33.6	560.1	11.8	564.4	76.1	560.2	11.7		0.15	0.761871		x
UD53	46		100	390	0.25641		0.744731	0.0573261	0.0908489	0.00208982	0.0596414	0.0019713	0.265116	0.399988		565.2	33.4	560.6	12.4	589.6	71.7	560.7	12.3		1.1	4.91859
UD53	47		244	707	0.34512		0.86483	0.068539	0.101488	0.00284483	0.061614	0.00214262	0.137517	0.571662		632.8	37.3	623.1	16.7	659.8	74.6	624.3	15.9		1.3	5.56229		x
UD53	48		132	412	0.320388		0.78537	0.0626279	0.0936586	0.00250476	0.0604493	0.00224363	0.23416	0.454402		588.5	35.6	577.1	14.8	618.7	80.1	578	14.5		1.5	6.72378
UD53	49		109	155	0.703226		0.757397	0.0690462	0.0923532	0.00259167	0.0594356	0.00346393	0.145351	0.257896		572.5	39.9	569.4	15.3	582.1	126.6	569.7	14.9		0.45	2.18176
UD53	50		258	553	0.466546		3.07844	0.24666	0.241055	0.0111405	0.0924829	0.00386616	0.652169	0.58597		1427.3	61.4	1392.2	57.9	1476.5	79.3	1405.7	55.4		2.7	5.70945
UD53	51		79	118	0.669492		0.896161	0.0763292	0.102535	0.00268515	0.0632683	0.00302738	0.224288	0.245214		649.7	40.9	629.2	15.7	716.3	101.6	630.5	15.5		3.2	12.1597
UD53	52		49	173	0.283237		0.729001	0.056604	0.089743	0.00213321	0.0595616	0.00220937	0.394646	0.20962		556	33.2	554	12.6	586.7	80.5	554	12.6		1.2	5.57355
UD53	53		95	789	0.120406		0.834449	0.06499	0.102086	0.00249288	0.0589885	0.00194031	0.239096	0.418016		616.1	36	626.6	14.6	565.7	71.6	625.9	14.4		-2.2	-10.7654
UD53	54		89	110	0.809091		0.818318	0.0654774	0.100603	0.00266503	0.0598309	0.00246663	0.28506	0.308456		607.1	36.6	617.9	15.6	596.5	89.3	617.2	15.4		-0.74	-3.58759
UD53	55		131	144	0.909722		0.821393	0.065271	0.0997125	0.00236184	0.059807	0.00231605	0.300869	0.255866		608.8	36.4	612.7	13.8	595.6	83.9	612.6	13.8		-0.63	-2.87105
UD53	56		59	202	0.292079		0.765542	0.0598426	0.0943591	0.00229029	0.0588797	0.00204913	0.267566	0.3215		577.2	34.4	581.3	13.5	561.7	75.8	581.1	13.4		-0.71	-3.48941
UD53	57		88	612	0.143791		0.780023	0.0647642	0.0934323	0.00321568	0.0598588	0.00228583	0.200319	0.475337		585.5	36.9	575.8	19	597.5	82.7	577.3	18.1		0.68	3.6318
UD53	58		15	323	0.0464396		4.33813	0.339762	0.280185	0.00831649	0.112363	0.00345269	0.236966	0.676655		1700.6	64.6	1592.3	41.9	1837.2	55.7	1614.4	39.7		9.3	13.3301
UD53	59		83	434	0.191244		0.734091	0.0575759	0.0915599	0.00240124	0.0582238	0.00206749	0.246184	0.428624		559	33.7	564.8	14.2	537.2	77.7	564.3	13.9		-0.98	-5.13775
UD53	60		233	507	0.459566		0.835045	0.0628652	0.101601	0.00216999	0.0593619	0.00165648	0.30974	0.549299		616.4	34.8	623.8	12.7	579.4	60.6	623.6	12.7		-1.7	-7.6631		x
UD53	61		27	62	0.435484		0.726058	0.0606494	0.0921956	0.0023534	0.0578238	0.00276574	0.279112	0.192519		554.2	35.7	568.5	13.9	522.1	104.9	567.8	13.8		-1.7	-8.88719
UD53	62		57	91	0.626374		0.965124	0.0760469	0.112845	0.00257499	0.0620005	0.00229862	0.261025	0.272262		685.9	39.3	689.2	14.9	673.2	79.3	689.1	14.8		-0.6	-2.37671
UD53	63		6	26	0.230769		0.915256	0.0901564	0.103288	0.00366259	0.0669207	0.00507534	0.371311	0.132993		659.8	47.8	633.6	21.4	834.4	158	634.5	21.4		7.6	24.0652
UD53	64		57	243	0.234568		0.754235	0.0582379	0.0943892	0.00225427	0.0583458	0.00198021	0.33201	0.337731		570.7	33.7	581.4	13.3	541.8	74.2	581.1	13.2		-1.5	-7.30897
UD53	65		32	119	0.268908		0.768454	0.0634281	0.0914137	0.00240988	0.0608622	0.00265268	0.265097	0.260857		578.9	36.4	563.9	14.2	633.4	93.9	564.6	14.1		2.5	10.9725
UD53	66		53	69	0.768116		0.866323	0.0720021	0.101946	0.00256103	0.0619218	0.00294423	0.332269	0.125048		633.6	39.2	625.8	15	670.5	101.7	626	15		1.7	6.66667		x
UD53	67		36	42	0.857143		0.753069	0.0758419	0.0930234	0.00334675	0.0601011	0.00467646	0.403687	0.120433		570	43.9	573.4	19.7	606.2	168.3	573.3	19.7		1.2	5.41076
UD53	68		415	617	0.672609		1.28036	0.0976235	0.105436	0.00240724	0.088038	0.00262111	0.204698	0.495441		837	43.5	646.2	14	1382.4	57.2	649.9	14.1		29	53.2552
UD53	69		29	54	0.537037		0.879095	0.0745358	0.103769	0.0028799	0.0618444	0.00310152	0.32114	0.189797		640.5	40.3	636.5	16.8	667.8	107.4	636.6	16.7		1.2	4.68703
UD53	70		60	161	0.372671		0.828823	0.0651885	0.101355	0.00239502	0.059628	0.00227816	0.332254	0.234631		613	36.2	622.3	14	589.1	82.9	622.1	14		-1.2	-5.63572
UD53	71		129	254	0.507874		0.76923	0.0622932	0.0948075	0.00262475	0.0591867	0.00234453	0.127577	0.447925		579.3	35.8	583.9	15.5	573	86.2	583.3	14.8		-0.35	-1.90227
UD53	72		34	95	0.357895		0.850593	0.0760783	0.100237	0.00324262	0.0615367	0.0032526	0.0859618	0.4166		625	41.7	615.8	19	657.1	113.4	617.1	17.8		1.4	6.28519		x
UD53	73		52	91	0.571429		0.869456	0.0718704	0.103124	0.00284387	0.0613785	0.00270334	0.300266	0.245414		635.3	39	632.7	16.6	651.6	94.5	632.8	16.5		0.7	2.90055
UD53	74		64	136	0.470588		0.779148	0.0719344	0.0925289	0.00377938	0.061663	0.00416255	0.466462	0.143782		585	41.1	570.5	22.3	661.5	144.7	571.2	22.3		3.4	13.7566
UD53	75		32	52	0.615385		0.731085	0.0665455	0.0922635	0.00269549	0.0580714	0.00347732	0.310807	0.151444		557.2	39	568.9	15.9	531.5	131.1	568.4	15.8		-1.3	-7.03669
UD53	76		167	482	0.346473		1.75307	0.13114	0.174109	0.00384574	0.072905	0.00199339	0.36566	0.485107		1028.3	48.4	1034.7	21.1	1010.4	55.4	1034.5	21		-0.96	-2.40499		x
UD53	77		70	170	0.411765		0.840146	0.0654946	0.100842	0.00247442	0.0604941	0.00213991	0.314432	0.296611		619.2	36.1	619.3	14.5	620.3	76.3	619.3	14.4		0.038	0.161212
UD53	78		36	117	0.307692		0.763142	0.0614185	0.0931418	0.00235508	0.0599501	0.00255957	0.329549	0.16768		575.8	35.4	574.1	13.9	600.8	92.4	574.1	13.9		1	4.44407
UD53	79		131	257	0.509728		0.858135	0.0659121	0.10135	0.00231692	0.0610445	0.0019543	0.283426	0.394351		629.1	36	622.3	13.6	639.8	68.8	622.6	13.5		0.64	2.73523
UD53	80		74	122	0.606557		0.82438	0.0650816	0.0996094	0.00226781	0.0600953	0.00228436	0.233182	0.245159		610.5	36.2	612.1	13.3	606	82.2	612	13.2		-0.22	-1.0066
UD53	81		83	221	0.375566		0.762736	0.0667539	0.0898658	0.0032457	0.0618135	0.00347933	0.40486	0.189722		575.6	38.5	554.7	19.2	666.7	120.5	555.8	19.2		4.1	16.7992
UD53	82		43	185	0.232432		0.762356	0.0611648	0.0925039	0.00223804	0.0596276	0.00240966	0.268317	0.225217		575.4	35.2	570.3	13.2	589.1	87.7	570.5	13.1		0.68	3.19131		x
UD53	83		59	114	0.517544		0.836013	0.0667697	0.102425	0.00272184	0.0591764	0.00231659	0.341997	0.296574		616.9	36.9	628.6	15.9	572.6	85.2	628.1	15.8		-2.1	-9.77995		x
UD53	84		61	248	0.245968		0.75231	0.0581602	0.0922833	0.00214763	0.0591531	0.00206372	0.356837	0.227931		569.6	33.7	569	12.7	571.8	75.9	569	12.7		0.1	0.489682
UD53	85		141	240	0.5875		0.714475	0.0564464	0.0901518	0.00216786	0.0570819	0.00218291	0.240062	0.310712		547.4	33.4	556.4	12.8	493.7	84.3	555.9	12.7		-2.3	-12.7		x
UD53	43a		128	249	0.514056		0.774157	0.0602241	0.0948717	0.00222957	0.0594882	0.00208237	0.23153	0.377446		582.1	34.5	584.3	13.1	584	76	584.2	13		-0.017	-0.0513699
UD53	43b		138	193	0.715026		0.826664	0.0649185	0.0996388	0.00240624	0.0600597	0.0021387	0.241564	0.340729		611.8	36.1	612.3	14.1	604.8	77	612.3	13.9		-0.28	-1.24008
UD53	8a		61	175	0.348571		0.763957	0.0607428	0.0924244	0.0022323	0.0597733	0.00231626	0.29231	0.263697		576.3	35	569.9	13.2	594.4	84	570.1	13.1		0.9	4.1218
UD54	1		91	163	0.558282		0.82729	0.0291395	0.0966499	0.00158263	0.0621033	0.00245858	0.00430475	0.455938		612.1	16.2	594.7	9.3	676.7	84.6	599	8.1		2.7	12.1176
UD54	2		182	241	0.755187		1.02853	0.0447407	0.100789	0.00146298	0.0731322	0.00324995	0.124455	0.199071		718.2	22.4	619	8.6	1016.7	90	626.9	8.4		15	39.1168
UD54	3		73	137	0.532847		1.09986	0.0349208	0.101568	0.00171222	0.0782801	0.0024465	0.338944	0.202398		753.3	16.9	623.6	10	1153.1	62	638.5	10		19	45.9197
UD54	4		96	206	0.466019		0.817504	0.0358321	0.0962913	0.00205567	0.0624539	0.0027846	0.253461	0.245366		606.7	20	592.6	12.1	688.7	95.1	595.4	11.4		3.4	13.9538
UD54	5		100	232	0.431034		1.32711	0.0334531	0.102943	0.00135539	0.0945178	0.00242703	0.184366	0.368146		857.6	14.6	631.6	7.9	1517.6	48.4	659.3	7.8		33	58.3817
UD54	6		167	254	0.65748		1.19265	0.0436906	0.0999723	0.0017572	0.0882905	0.00374815	-0.0917754	0.494914		797.2	20.2	614.2	10.3	1387.9	81.5	649.7	9.1		28	55.7461
UD54	7		182	285	0.638596		0.832503	0.0241325	0.0980972	0.00178834	0.0626069	0.00182832	0.321469	0.317122		615	13.4	603.2	10.5	693.9	62.2	607	9.5		3.1	13.071
UD54	8		96	164	0.585366		0.823032	0.027593	0.0990476	0.00160693	0.0606646	0.00215876	0.078539	0.357385		609.7	15.4	608.8	9.4	626.4	76.7	609.1	8.3		0.64	2.80971
UD54	9		62	142	0.43662		0.875317	0.0237803	0.0956302	0.00126538	0.0669956	0.00201636	0.0836708	0.380908		638.5	12.9	588.7	7.4	836.7	62.7	599.6	6.7		8.4	29.6403
UD54	10		122	257	0.474708		0.822479	0.0238034	0.096903	0.00168223	0.0613426	0.00173487	0.214469	0.383024		609.4	13.3	596.2	9.9	650.3	60.7	600.4	8.7		1.7	8.31924
UD54	11		141	213	0.661972		0.816705	0.0203169	0.0982677	0.00147305	0.0607266	0.00159124	0.227878	0.261234		606.2	11.4	604.3	8.6	628.6	56.5	604.9	7.6		0.85	3.86573
UD54	12		73	151	0.483444		0.820426	0.0289305	0.0984828	0.00142857	0.0607306	0.00222263	0.111613	0.304175		608.3	16.1	605.5	8.4	628.8	78.9	606	7.8		0.83	3.70547
UD54	13		93	130	0.715385		1.33432	0.0831537	0.104298	0.00214678	0.0928644	0.00559656	0.305299	0.0157917		860.8	36.2	639.5	12.5	1484.3	114.2	637.5	12.6		34	56.9157
UD54	14		148	209	0.708134		0.933103	0.0312046	0.101255	0.00180931	0.066718	0.00236022	0.227212	0.274109		669.3	16.4	621.8	10.6	828	73.8	632.5	9.9		6.9	24.9034
UD54	15		45	74	0.608108		0.84563	0.0380252	0.0991749	0.00193682	0.0622554	0.00284278	0.169084	0.205299		622.2	20.9	609.6	11.4	681.9	97.5	611.8	10.7		2.5	10.6027
UD54	16		145	295	0.491525		2.32962	0.136598	0.112263	0.00316287	0.149975	0.0074568	0.514181	0.0034893		1221.4	41.7	685.9	18.3	2344.9	85	624.8	18.1		78	70.7493
UD54	17		113	249	0.453815		1.26403	0.0919179	0.10377	0.00221325	0.0912889	0.00689468	0.375116	-0.160864		829.7	41.2	636.5	12.9	1451.8	143.7	629	12.9		34	56.1579
UD54	18		37	162	0.228395		1.05124	0.0361229	0.0994764	0.00132577	0.0767921	0.00262008	0.210509	0.192732		729.5	17.9	611.3	7.8	1114.9	68.1	620.1	7.7		19	45.17
UD54	19		131	172	0.761628		0.854992	0.0302673	0.100271	0.00194495	0.0622624	0.00222298	0.29674	0.287015		627.4	16.6	616	11.4	682.2	76.3	618.8	10.6		2.2	9.7039
UD54	20		50	48	1.04167		0.954304	0.0450786	0.108164	0.00227665	0.0643867	0.00298777	0.282461	0.153794		680.3	23.4	662.1	13.2	753.4	98	664.9	12.8		3.2	12.1184
UD54	21		137	223	0.61435		0.829495	0.0225419	0.0980521	0.00130834	0.061438	0.00173443	0.171181	0.289278		613.3	12.5	603	7.7	653.6	60.6	605.4	7		1.7	7.74174
UD54	22		111	186	0.596774		0.817032	0.0236688	0.098351	0.00129572	0.0602404	0.00185095	0.137737	0.330275		606.4	13.2	604.7	7.6	611.2	66.4	605.1	7		0.21	1.06348
UD54	23		117	201	0.58209		0.814896	0.0216243	0.0986022	0.00140393	0.0594449	0.00152059	0.346447	0.259607		605.2	12.1	606.2	8.2	582.5	55.6	606	7.8		-0.87	-4.06867
UD54	24		53	128	0.414062		0.792233	0.0268004	0.0971849	0.00149816	0.0589579	0.00209917	0.0812851	0.353309		592.4	15.2	597.9	8.8	564.6	77.5	596.6	7.9		-1.1	-5.89798
UD54	25		118	242	0.487603		0.855674	0.0328653	0.100028	0.00186032	0.0618215	0.00237407	0.135634	0.306206		627.8	18	614.6	10.9	667	82.2	617.7	9.9		1.7	7.85607
UD54	26		78	163	0.478528		1.21062	0.0631403	0.101047	0.00262761	0.0868495	0.00408086	0.466965	0.0571073		805.5	29	620.5	15.4	1356.3	90.6	617.6	15.7		30	54.2505
UD54	27		155	272	0.569853		1.14357	0.0410872	0.101582	0.00123723	0.0812881	0.00265377	0.38785	-0.0798359		774.2	19.5	623.7	7.2	1227.5	64.1	619.5	7.3		24	49.1894
UD54	28		118	180	0.655556		0.891667	0.0267533	0.100531	0.00143692	0.0641146	0.00188275	0.289837	0.2208		647.3	14.4	617.5	8.4	744.5	62.1	622.4	8.1		4.4	17.0584
UD54	29		22	63	0.349206		0.972089	0.0762282	0.112095	0.00314954	0.0633944	0.00516432	0.0504008	0.2731		689.5	39.2	684.9	18.3	720.5	172.9	685.7	16.9		1.3	4.94101
UD54	30		81	184	0.440217		0.847553	0.0283473	0.0988163	0.00142408	0.0622615	0.0021279	0.180173	0.28128		623.3	15.6	607.5	8.4	682.2	73	610.2	7.9		2.6	10.9499
UD54	31		164	213	0.769953		0.834408	0.0313531	0.0973068	0.00157228	0.0623193	0.00241651	0.141738	0.29606		616.1	17.4	598.6	9.2	684.1	82.8	601.7	8.6		2.9	12.4982
UD54	32		71	135	0.525926		1.30412	0.0676869	0.10567	0.00202999	0.0885964	0.00471479	0.074549	0.269756		847.5	29.8	647.6	11.8	1394.6	102.1	664.9	11.5		28	53.5637
UD54	33		77	166	0.463855		0.847876	0.0255949	0.100369	0.00153394	0.0615816	0.00203053	0.10368	0.404257		623.5	14.1	616.6	9	658.7	70.7	618.4	7.9		1.4	6.39138
UD54	34		119	246	0.48374		0.83158	0.0242484	0.0986669	0.00158969	0.0611087	0.00198425	0.0299012	0.487957		614.5	13.4	606.6	9.3	642.1	69.8	609.1	7.8		1.1	5.52873
UD54	35		49	106	0.462264		1.12439	0.0431542	0.10257	0.00164065	0.0790475	0.00318922	0.116476	0.339343		765.1	20.6	629.5	9.6	1172.4	79.9	645.7	9.3		20	46.3067
UD54	36		99	177	0.559322		0.872708	0.0475237	0.0998086	0.00205787	0.0633967	0.00346907	0.160676	0.207268		637	25.8	613.3	12.1	720.6	116.1	616.4	11.6		3.8	14.8904
UD54	37		133	281	0.47331		0.814576	0.0252776	0.0985674	0.00150296	0.0599856	0.00191369	0.197403	0.284056		605	14.1	606	8.8	602.1	69.1	605.8	8.1		-0.13	-0.647733
UD54	38		67	122	0.54918		0.937379	0.0363909	0.108493	0.00216205	0.0628539	0.00248699	0.201997	0.305767		671.5	19.1	664	12.6	702.3	84.2	665.9	11.4		1.3	5.45351
UD54	39		101	188	0.537234		0.924371	0.021286	0.0975398	0.00136806	0.0688144	0.00178961	0.166593	0.364319		664.7	11.2	600	8	892.2	53.7	618.7	7.2		9.5	32.7505
UD54	40		69	157	0.43949		5.54965	0.569662	0.139532	0.00700233	0.285397	0.0207335	0.777579	-0.456183		1908.3	88.3	842	39.6	3392	113.2	599.6	28.9		140	75.1769
UD54	41		82	130	0.630769		0.835214	0.0307734	0.099285	0.00169092	0.0606956	0.00241467	0.13554	0.302917		616.5	17	610.2	9.9	627.5	85.8	611.6	9.1		0.53	2.75697
UD54	42		89	147	0.605442		0.83214	0.028725	0.0980162	0.00143109	0.061376	0.00215557	0.175418	0.239286		614.8	15.9	602.8	8.4	651.5	75.4	604.8	7.9		1.6	7.47506
UD54	43		121	224	0.540179		0.848289	0.0227959	0.0999461	0.0010939	0.0614804	0.00173114	0.093961	0.309426		623.7	12.5	614.1	6.4	655.1	60.4	615.8	5.9		1.4	6.25859
UD54	44		100	214	0.46729		1.41978	0.066455	0.106182	0.0024566	0.0987412	0.00492045	0.217885	0.275686		897.3	27.9	650.5	14.3	1599.6	93	672.4	14.3		37	59.3336
UD54	45		85	197	0.431472		0.83344	0.0326993	0.0994129	0.00167838	0.060231	0.00256997	0.0667554	0.353113		615.5	18.1	611	9.8	610.9	92.2	611.9	8.9		-0.16	-0.0163693
UD54	46		76	167	0.45509		0.794156	0.0244459	0.0979755	0.00140713	0.0589206	0.00190368	0.14922	0.312708		593.5	13.8	602.5	8.3	563.2	70.4	600.5	7.5		-1.3	-6.97798
UD54	47		116	246	0.471545		0.88431	0.0264579	0.0984783	0.00157827	0.0649839	0.00192074	0.246077	0.276312		643.3	14.3	605.5	9.3	772.9	62.2	614	8.6		5.6	21.6587
UD54	48		90	190	0.473684		0.830748	0.0304294	0.0976268	0.00170792	0.0618297	0.00220336	0.306685	0.140762		614	16.9	600.5	10	667.3	76.3	602.8	9.6		2.3	10.0105
UD54	49		114	233	0.48927		1.81073	0.0654417	0.107203	0.0012359	0.121899	0.00421038	0.32939	-0.0241476		1049.3	23.6	656.5	7.2	1983.4	61.5	642.8	7.2		57	66.9003
UD54	50		154	261	0.590038		0.867409	0.0372207	0.0980916	0.00161383	0.0641205	0.00277312	0.167914	0.248699		634.2	20.2	603.2	9.5	744.6	91.4	607.1	9.1		5	18.9901
UD54	51		28	47	0.595745		0.939022	0.0512879	0.107288	0.00239553	0.0639168	0.00348389	0.109304	0.278611		672.4	26.9	657	13.9	737.9	115.4	659.8	12.9		2.8	10.9635
UD54	52		85	182	0.467033		0.922519	0.0323454	0.0989792	0.0018765	0.0675128	0.00229225	0.302156	0.294303		663.7	17.1	608.4	11	852.7	70.5	619.2	10.5		8.4	28.6502
UD54	53		40	99	0.40404		0.819373	0.0326024	0.0979836	0.0019264	0.0610627	0.00252142	0.205697	0.268754		607.7	18.2	602.6	11.3	640.5	88.8	603.7	10.4		1.3	5.91725
UD54	54		119	217	0.548387		0.837823	0.0383802	0.0988322	0.00212962	0.061259	0.00257203	0.25092	0.266995		617.9	21.2	607.6	12.5	647.4	90.2	609.5	11.8		1.3	6.14767
UD54	55		78	198	0.393939		0.810055	0.0292283	0.0987654	0.00152568	0.059862	0.00228808	0.0773387	0.358167		602.5	16.4	607.2	9	597.6	82.8	606.2	8.1		-0.28	-1.60643
UD54	56		172	266	0.646617		0.792524	0.0208456	0.0969867	0.00130289	0.0597334	0.00161617	0.265456	0.233023		592.6	11.8	596.7	7.7	592.9	58.6	595.8	7.1		-0.12	-0.640918
UD54	57		170	289	0.588235		0.963259	0.0489424	0.0999193	0.00149375	0.0699207	0.00307731	0.408609	-0.197516		685	25.3	613.9	8.8	925.1	90.4	611.5	8.8		12	33.6396
UD54	58		136	238	0.571429		0.828214	0.0269258	0.0983579	0.00158426	0.0616044	0.00214265	0.187315	0.312933		612.6	15	604.8	9.3	659.4	74.6	606.6	8.5		1.9	8.28025
UD54	59		21	32	0.65625		0.924709	0.0600441	0.109053	0.00263445	0.0634572	0.00452583	-0.0877983	0.427477		664.8	31.7	667.2	15.3	722.6	151.3	666.7	13.3		2.2	7.66676
UD54	60		56	103	0.543689		0.810671	0.0353607	0.0985905	0.00191014	0.0599661	0.00271638	0.131809	0.287795		602.8	19.8	606.1	11.2	601.4	98	605.4	10.3		-0.13	-0.78151
UD54	61		116	218	0.53211		1.23952	0.0484213	0.102732	0.00133245	0.0879002	0.0033425	0.300627	-0.00644121		818.7	22	630.4	7.8	1379.4	73.1	630	7.9		30	54.299
UD54	62		107	195	0.548718		0.845808	0.127907	0.0992875	0.0026536	0.0587275	0.00681925	0.565188	-0.325945		622.3	70.4	610.2	15.6	556	253.3	609.1	14.4		-1.9	-9.7482
UD54	63		127	201	0.631841		1.48881	0.0646515	0.107584	0.00168947	0.0994018	0.00338513	0.662594	-0.346654		925.8	26.4	658.7	9.8	1612.1	63.4	610.7	8.9		45	59.1403
UD54	65		251	320	0.784375		0.722153	0.102392	0.0966498	0.00206955	0.0534677	0.00726796	0.353343	-0.17511		551.9	60.4	594.7	12.2	347.7	307.4	596.2	12		-9.3	-71.0383
UD54	66		114	162	0.703704		3.96051	0.390931	0.123457	0.00357379	0.215404	0.0158233	0.893347	-0.784532		1626.1	80	750.4	20.5	2945.9	118.6	604.8	10.3		110	74.5273
UD54	67		213	313	0.680511		1.19412	0.0503133	0.103636	0.00182401	0.0834461	0.00301312	0.46515	-0.00628321		797.9	23.3	635.7	10.7	1278.8	70.4	629	10.8		26	50.2893
UD54	68		112	217	0.516129		0.901564	0.0335564	0.0984847	0.00174541	0.0670317	0.00246985	0.267395	0.182192		652.6	17.9	605.5	10.2	837.8	76.7	612.9	9.9		8.2	27.7274
UD54	69		70	104	0.673077		0.833677	0.0381514	0.0984809	0.0016817	0.0621622	0.00293202	0.0874724	0.226891		615.7	21.1	605.5	9.9	678.7	100.8	607.1	9.2		2.6	10.7853
UD54	70		134	257	0.521401		0.837294	0.0223229	0.0983609	0.00148512	0.0624006	0.00177684	0.169408	0.398346		617.7	12.3	604.8	8.7	686.9	60.8	608.6	7.7		2.7	11.9522
UD54	71		55	90	0.611111		0.848925	0.0445104	0.099598	0.00214006	0.0623765	0.0031082	0.228318	0.138787		624.1	24.4	612.1	12.5	686.1	106.3	613.7	12.1		2.6	10.7856
UD54	72		101	191	0.528796		0.844479	0.0269238	0.099448	0.00148992	0.0620497	0.00197079	0.247205	0.261278		621.6	14.8	611.2	8.7	674.9	67.9	613.1	8.3		2.2	9.43844
UD54	73		100	181	0.552486		0.820009	0.0245751	0.0984294	0.00135824	0.0609967	0.00189927	0.121258	0.302712		608.1	13.7	605.2	8	638.2	67	605.8	7.2		1.2	5.17079
UD54	74		104	184	0.565217		0.822288	0.0219636	0.098379	0.00159769	0.0611976	0.00170977	0.236378	0.370244		609.3	12.2	604.9	9.4	645.2	60	606.4	8.2		1.4	6.24613
UD54	75		182	266	0.684211		0.836628	0.0251249	0.0996551	0.00159307	0.0616346	0.00200882	0.169575	0.349869		617.3	13.9	612.4	9.3	660.5	69.9	613.7	8.3		1.7	7.28236
UD54	76		110	254	0.433071		0.827522	0.0268871	0.0990878	0.00184738	0.0612165	0.00198144	0.256872	0.29937		612.2	14.9	609.1	10.8	645.9	69.5	610	9.8		1.3	5.69748
UD54	77		219	353	0.620397		26.2247	2.2094	0.310729	0.0168841	0.601167	0.0189728	0.956902	-0.615346		3355	82.4	1744.3	83	4510.2	45.9	782.7	30.9		230	61.3254
UD54	78		64	102	0.627451		0.849193	0.033072	0.0963755	0.00177175	0.0646177	0.00260442	0.18706	0.276997		624.2	18.2	593.1	10.4	761	85	599.1	9.8		5.8	22.0631
UD54	79		76	121	0.628099		0.814432	0.0310051	0.101131	0.00136858	0.058457	0.0022388	0.184807	0.173941		604.9	17.4	621	8	545.9	83.7	619	7.7		-2.6	-13.7571
UD54	80		140	295	0.474576		0.87327	0.0261758	0.0987254	0.00175999	0.0643879	0.00197224	0.290566	0.270428		637.3	14.2	606.9	10.3	753.5	64.7	615.3	9.5		4.8	19.4559
UD54	81		116	189	0.613757		0.945578	0.0253804	0.103267	0.00136323	0.0667383	0.00186124	0.183988	0.27488		675.8	13.2	633.5	8	828.7	58.2	642.3	7.4		6.7	23.555
UD54	82		183	290	0.631034		1.36413	0.0663798	0.0983491	0.00182964	0.100972	0.00473185	0.215394	0.163974		873.6	28.5	604.7	10.7	1641.2	87	611.7	10.8		42	63.155
UD54	83		52	69	0.753623		0.937865	0.0473311	0.106782	0.00234286	0.0635556	0.00328827	0.17259	0.251982		671.8	24.8	654	13.6	725.9	109.7	657.3	12.8		2.4	9.90495
UD54	84		77	119	0.647059		0.830602	0.0291573	0.0989175	0.00137922	0.0608509	0.00216838	0.216556	0.225189		613.9	16.2	608.1	8.1	633	76.7	608.9	7.8		0.86	3.93365
UD54	85		88	137	0.642336		1.04732	0.0431128	0.104009	0.00163709	0.0728522	0.0031137	0.113894	0.232437		727.6	21.4	637.9	9.6	1008.9	86.7	648.5	9.2		13	36.7727
UD54	86		92	191	0.481675		0.843298	0.0267096	0.0987755	0.00151482	0.0618268	0.00196408	0.0938657	0.337699		621	14.7	607.2	8.9	667.2	68	610.6	7.9		2	8.99281
UD54	87		73	140	0.521429		0.908608	0.036472	0.0997899	0.00181559	0.0657411	0.0025574	0.232493	0.209449		656.3	19.4	613.2	10.6	797.2	81.5	619.8	10.2		6.4	23.0808
UD54	88		50	85	0.588235		0.940085	0.0549503	0.10862	0.00302359	0.0623672	0.0036694	0.160621	0.254074		672.9	28.8	664.7	17.6	685.8	125.6	666.6	16		0.64	3.0767
UD54	89		90	177	0.508475		0.803599	0.0229357	0.0984549	0.00128141	0.0589384	0.001688	0.213488	0.253018		598.9	12.9	605.3	7.5	563.8	62.4	604.1	7		-1.4	-7.36077
UD54	90		522	756	0.690476		0.74228	0.0328746	0.0572966	0.00090416	0.0939967	0.00423742	0.0941366	0.315408		563.7	19.2	359.2	5.5	1507.2	85.1	366.7	5.5		45	76.1677
UD54	91		193	280	0.689286		0.853095	0.0253086	0.0967704	0.00125404	0.0637061	0.0019088	0.157404	0.243731		626.3	13.9	595.5	7.4	730.9	63.5	600.7	6.9		4.6	18.5251
UD54	92		194	368	0.527174		0.823864	0.0281497	0.0994269	0.00167347	0.0597098	0.00214274	0.112218	0.266461		610.2	15.7	611.1	9.8	592.1	77.8	610.8	8.7		-0.69	-3.20892
UD54	93		143	264	0.541667		1.93738	0.123032	0.104828	0.00304669	0.132959	0.00981349	0.135398	0.205886		1094.1	42.5	642.6	17.8	2136.6	129.1	663.5	17.9		61	69.9242
UD54	94		85	159	0.534591		0.835166	0.0301294	0.097822	0.00173582	0.0619479	0.00243318	0.0864697	0.399789		616.5	16.7	601.6	10.2	671.4	84	605.3	9.1		2.3	10.3962
UD54	95		131	160	0.81875		0.81515	0.0248137	0.0978463	0.00131417	0.0596971	0.00186119	0.0898746	0.332803		605.3	13.9	601.8	7.7	591.6	67.6	602.5	7		-0.47	-1.72414
UD54	96		90	198	0.454545		1.72468	0.0971356	0.104847	0.002711	0.117003	0.00589627	0.426528	0.123382		1017.8	36.2	642.8	15.8	1910.1	90.5	621.4	16		55	66.3473
UD54	97		128	234	0.547009		0.890531	0.041706	0.0992953	0.00225887	0.0648873	0.00294017	0.395629	0.0847678		646.7	22.4	610.3	13.2	769.7	95.4	614.6	13.1		5.7	20.7094
UD54	98		130	186	0.698925		0.839853	0.0262102	0.0992798	0.00147472	0.0605219	0.00184214	0.276536	0.226258		619.1	14.5	610.2	8.6	621.3	65.7	611.8	8.2		0.31	1.78658
UD54	99		112	161	0.695652		0.826552	0.0262347	0.098926	0.00135843	0.0597876	0.00189212	0.172716	0.263545		611.7	14.6	608.1	8	594.9	68.6	608.8	7.5		-0.57	-2.21886
UD54	100		117	214	0.546729		0.801347	0.0273516	0.099424	0.0014499	0.0580959	0.00188485	0.259562	0.204083		597.6	15.4	611	8.5	532.4	71.1	608.9	8.1		-2.7	-14.7633
UD54	101		89	131	0.679389		0.833047	0.0277516	0.0991848	0.00153974	0.0599684	0.00196921	0.203517	0.275849		615.3	15.4	609.6	9	601.4	71.1	610.8	8.4		-0.45	-1.36349
UD54	102		230	322	0.714286		0.824971	0.018707	0.0988369	0.00129067	0.0598021	0.0013347	0.276856	0.286412		610.8	10.4	607.6	7.6	595.4	48.4	608.5	6.9		-0.57	-2.04904
UD54	103		85	150	0.566667		2.69179	0.0517026	0.227549	0.00269217	0.0846253	0.00173466	0.162072	0.434813		1326.2	14.2	1321.6	14.1	1306.1	39.8	1323.9	10.8		-0.84	-1.18674
UD54	104		274	382	0.717277		0.791746	0.0208654	0.0954409	0.00138294	0.0593025	0.00161882	0.124299	0.388257		592.2	11.8	587.6	8.1	577.2	59.3	589	7.1		-0.57	-1.8018
UD54	105		66	122	0.540984		0.808294	0.0263751	0.0965594	0.00160812	0.0604153	0.00214862	0.0481576	0.419014		601.5	14.8	594.2	9.5	617.5	76.8	596.2	8.2		0.7	3.77328
UD54	106		146	257	0.568093		1.0618	0.0713998	0.0957869	0.00160027	0.0792907	0.00535968	0.195359	0.0580692		734.7	35.2	589.7	9.4	1178.5	133.7	591.1	9.4		23	49.9618
UD54	107		91	198	0.459596		0.840698	0.0303797	0.0984771	0.00181616	0.0613651	0.00207058	0.344859	0.190651		619.5	16.8	605.5	10.7	651.1	72.4	608.1	10.2		1.5	7.00353
UD54	108		139	248	0.560484		0.81698	0.0391197	0.0963286	0.00191688	0.0613596	0.00294854	0.302667	-0.0781633		606.4	21.9	592.9	11.3	650.9	103.2	594.4	11		2	8.91074
UD54	74b		102	212	0.481132		1.40337	0.0746421	0.102614	0.00178772	0.0991238	0.00523611	0.232077	0.10384		890.4	31.5	629.7	10.5	1606.9	98.5	631.7	10.5		40	60.8127
UD56	1		114	145	0.786207		0.8063	0.0494019	0.0988724	0.00370228	0.0593439	0.00201684	0.216503	0.205276		600.4	27.8	607.8	21.7	578.8	73.9	605.2	18.7		-0.87	-5.01037
UD56	2		65	128	0.507812		0.825984	0.0524282	0.0992663	0.00385739	0.0603127	0.0022761	0.219758	0.337345		611.4	29.2	610.1	22.6	613.9	81.5	610.5	19.7		0.11	0.618993
UD56	3		64	148	0.432432		0.841229	0.0559107	0.0999902	0.00394523	0.0615473	0.00274399	0.0685482	0.334379		619.8	30.8	614.4	23.1	657.4	95.6	616.3	19.1		1.4	6.54092
UD56	4		29	37	0.783784		0.918914	0.0688451	0.10587	0.0043858	0.0634049	0.00372849	0.0755134	0.308227		661.8	36.4	648.7	25.6	720.9	124.8	652.8	21.7		2.4	10.0153
UD56	5		185	236	0.783898		0.822282	0.0479443	0.0977542	0.00367092	0.061229	0.00174664	0.253449	0.338021		609.3	26.7	601.2	21.6	646.3	61.3	604.1	18.8		1.4	6.97818
UD56	6		46	105	0.438095		0.796725	0.0524019	0.09605	0.0037478	0.0605355	0.00259167	0.144394	0.285877		595	29.6	591.2	22	621.8	92.4	592.5	18.9		1	4.9212
UD56	7		159	198	0.80303		0.793388	0.0478707	0.0954331	0.00361555	0.0601525	0.00190007	0.321316	0.232727		593.1	27.1	587.6	21.3	608.1	68.3	589.4	19.1		0.62	3.37116
UD56	8		95	88	1.07955		0.951106	0.0639727	0.112701	0.00466178	0.0607671	0.00255909	0.270723	0.267281		678.7	33.3	688.4	27	630	90.7	684.9	23.5		-1.9	-9.26984
UD56	9		98	192	0.510417		0.821167	0.0490442	0.0993061	0.00370118	0.0598352	0.00184321	0.16052	0.290235		608.7	27.3	610.3	21.7	596.6	66.7	609.7	18.3		-0.46	-2.29635
UD56	10		149	216	0.689815		0.795283	0.0465825	0.0981861	0.00366592	0.05931	0.00172631	0.21763	0.302957		594.2	26.3	603.8	21.5	577.5	63.2	600.2	18.3		-0.74	-4.55411
UD56	11		43	49	0.877551		1.00222	0.0814247	0.0945088	0.00416489	0.0776858	0.00509229	0.0507346	0.338621		704.9	41.3	582.1	24.5	1138	130.4	609.3	22.2		19	48.8489
UD56	12		45	112	0.401786		0.80148	0.0495354	0.0974081	0.00372165	0.0601998	0.0022224	0.094284	0.349488		597.7	27.9	599.2	21.9	609.8	79.8	598.6	18		0.47	1.73827
UD56	13		85	151	0.562914		0.806204	0.0483221	0.0968853	0.00365069	0.060094	0.00184476	0.286356	0.250059		600.3	27.2	596.1	21.5	606	66.4	597.5	19		0.28	1.63366
UD56	14		78	124	0.629032		0.8284	0.0506647	0.098837	0.00376248	0.0607867	0.00209826	0.120099	0.349023		612.7	28.1	607.6	22.1	630.7	74.3	609.5	18.4		0.71	3.6626
UD56	15		69	140	0.492857		0.8203	0.0501113	0.0993187	0.00380928	0.0598322	0.00202474	0.18063	0.335112		608.2	28	610.4	22.3	596.5	73.3	609.6	18.9		-0.45	-2.33026
UD56	16		304	255	1.19216		0.803027	0.0474227	0.0909446	0.00339494	0.0638321	0.00182444	0.374298	0.143414		598.5	26.7	561.1	20.1	735.1	60.5	571.1	18.8		5.6	23.6702
UD56	17		168	195	0.861538		0.83041	0.0480541	0.0987074	0.00370041	0.0608678	0.00172206	0.175115	0.391636		613.8	26.7	606.8	21.7	633.6	60.9	609.5	18.3		0.8	4.2298
UD56	18		30	50	0.6		0.802099	0.0553597	0.0979537	0.00392499	0.0602772	0.00309542	-0.0979038	0.447355		598	31.2	602.4	23	612.6	110.9	600.8	17.6		0.59	1.66503
UD56	19		45	123	0.365854		0.820835	0.0550565	0.100468	0.00403476	0.0595133	0.00268647	0.322803	0.0788511		608.5	30.7	617.2	23.6	584.9	98	614.4	21.3		-0.98	-5.52231
UD56	20		75	184	0.407609		0.817521	0.055515	0.0964288	0.00400352	0.0620161	0.00293707	0.218566	0.252829		606.7	31	593.4	23.5	673.7	101.3	597.7	20.7		2.6	11.9193
UD56	21		27	76	0.355263		0.839742	0.0593288	0.0992394	0.00410633	0.061811	0.00304766	0.185779	0.284244		619	32.7	609.9	24.1	666.6	105.6	612.8	21.1		1.9	8.50585
UD56	22		82	161	0.509317		0.816688	0.0518931	0.10061	0.00392256	0.0593009	0.00239497	0.0940719	0.361424		606.2	29	618	23	577.2	87.8	613.5	18.7		-1.2	-7.06861
UD56	23		84	144	0.583333		0.824717	0.0508468	0.0977264	0.0036372	0.0610328	0.00213049	0.186065	0.244109		610.7	28.3	601.1	21.4	639.4	75.1	604.2	18.5		1.2	5.98999
UD56	24		145	225	0.644444		0.806598	0.0477065	0.0965931	0.00364824	0.0603834	0.001782	0.268318	0.330344		600.5	26.8	594.4	21.4	616.4	63.7	596.6	18.8		0.65	3.56911
UD56	25		69	76	0.907895		0.809832	0.0540978	0.101307	0.00407292	0.058149	0.00262494	0.015302	0.429478		602.4	30.4	622.1	23.8	534.4	98.8	614.5	18.8		-2.6	-16.4109
UD56	26		192	207	0.927536		0.794412	0.0470785	0.0960996	0.00362717	0.0598207	0.0018237	0.279136	0.28401		593.7	26.6	591.5	21.3	596.1	66.1	592.3	18.8		0.13	0.771683
UD56	27		45	97	0.463918		0.813098	0.0511166	0.0971509	0.00382174	0.0610265	0.00238798	0.135057	0.355378		604.2	28.6	597.7	22.5	639.2	84.2	600	18.8		1.3	6.49249
UD56	28		66	160	0.4125		0.827835	0.0505272	0.0979586	0.00369085	0.0611239	0.00203845	0.266129	0.185699		612.4	28.1	602.4	21.7	642.6	71.7	605.7	19.3		1.2	6.25584
UD56	29		210	193	1.08808		0.794755	0.0471752	0.0965796	0.00362812	0.0595096	0.00177642	0.312427	0.232759		593.9	26.7	594.3	21.3	584.8	64.8	594.2	19		-0.34	-1.62449
UD56	30		157	237	0.662447		0.838291	0.0488226	0.101747	0.00384397	0.059393	0.00168065	0.276912	0.340652		618.2	27	624.6	22.5	580.6	61.5	622.2	19.4		-1.4	-7.57837
UD56	31		459	394	1.16497		1.13222	0.0720909	0.0957168	0.0038375	0.085426	0.00328292	0.29249	0.311971		768.8	34.3	589.3	22.6	1324.4	74.4	619.1	22.1		26	55.5044
UD56	32		140	212	0.660377		0.870531	0.0577972	0.101931	0.00438133	0.0614299	0.00256251	0.37446	0.277589		635.9	31.4	625.7	25.6	653.4	89.5	629.1	23.2		0.8	4.23936
UD56	33		231	317	0.728707		0.822542	0.0474237	0.0985946	0.00365656	0.0603496	0.00169118	0.139433	0.407964		609.5	26.4	606.2	21.5	615.2	60.5	607.4	17.8		0.26	1.46294
UD56	34		42	107	0.392523		0.81769	0.0534307	0.0974613	0.00386158	0.0609892	0.0027156	0.00141428	0.430939		606.8	29.8	599.5	22.7	637.9	95.8	602.2	18.1		1.2	6.01975
UD56	35		104	179	0.581006		0.84568	0.0500535	0.10251	0.0038549	0.0594918	0.00179084	0.209521	0.300549		622.3	27.5	629.1	22.5	584.2	65.4	626.5	19.1		-1.5	-7.68572
UD56	36		142	204	0.696078		0.838644	0.0501449	0.100344	0.00378929	0.060277	0.0018615	0.252175	0.273805		618.4	27.7	616.4	22.2	612.6	66.7	617.1	19.3		-0.24	-0.620307
UD56	37		33	70	0.471429		0.863508	0.0677872	0.103605	0.00451458	0.0607039	0.00402984	-0.0510641	0.493645		632	36.9	635.5	26.4	627.8	143.1	634.3	20.9		-0.22	-1.22651
UD56	38		51	109	0.46789		0.823613	0.0527662	0.0985691	0.00382968	0.0608963	0.00239712	0.261446	0.20118		610.1	29.4	606	22.5	634.6	84.7	607.3	20		0.95	4.50678
UD56	39		81	155	0.522581		0.832756	0.0490867	0.0995351	0.00375708	0.0605239	0.00187634	0.0335381	0.448225		615.1	27.2	611.7	22	621.4	66.9	613	17.4		0.28	1.56099
UD56	40		385	300	1.28333		0.804419	0.047948	0.0955146	0.00364378	0.0604316	0.00181686	0.348209	0.292469		599.3	27	588.1	21.4	618.1	64.9	591.7	19.4		0.86	4.85358
UD56	41		121	190	0.636842		0.828116	0.0486356	0.0979034	0.00366594	0.0610143	0.00181479	0.180971	0.36615		612.6	27	602.1	21.5	638.8	64	605.9	18.3		1.1	5.74515
UD56	42		205	152	1.34868		0.887442	0.0589189	0.0993449	0.00398634	0.0639619	0.0025555	0.399626	0.0966884		645	31.7	610.6	23.4	739.4	84.5	619	22.2		4.1	17.4195
UD56	43		69	142	0.485915		0.801845	0.0498212	0.0994594	0.00377284	0.0581211	0.00211038	0.176748	0.291276		597.9	28.1	611.2	22.1	533.3	79.5	606.4	18.7		-2.5	-14.6072
UD56	44		119	175	0.68		0.832818	0.0510973	0.0996841	0.00377692	0.0598842	0.00200971	0.267887	0.259905		615.2	28.3	612.6	22.1	598.4	72.7	613.4	19.6		-0.64	-2.37299
UD56	45		137	198	0.691919		0.837955	0.0492972	0.0983465	0.00377295	0.0613211	0.00180399	0.272479	0.354651		618	27.2	604.7	22.1	649.5	63.2	609.4	19.4		1.3	6.89761
UD56	46		117	204	0.573529		0.821585	0.0515509	0.0976183	0.00375666	0.0604645	0.00216341	0.220755	0.267765		608.9	28.7	600.4	22.1	619.3	77.2	603.3	19.3		0.53	3.05183
UD56	47		65	134	0.485075		0.808326	0.0489943	0.0979525	0.00371683	0.059345	0.00195445	0.123322	0.35506		601.5	27.5	602.4	21.8	578.8	71.5	602.1	18.1		-0.85	-4.0774
UD56	48		72	153	0.470588		0.871876	0.0552165	0.103156	0.00411045	0.061162	0.00228747	0.252222	0.306951		636.6	30	632.9	24	644	80.4	634.2	20.9		0.32	1.7236
UD56	49		148	232	0.637931		0.830903	0.0488644	0.0993578	0.00373237	0.0602024	0.00178771	0.228515	0.316964		614.1	27.1	610.6	21.9	609.9	64.2	611.9	18.8		-0.22	-0.114773
UD56	50		73	141	0.51773		0.844463	0.0515996	0.0999878	0.00395348	0.0616788	0.00217882	0.259278	0.371115		621.6	28.4	614.3	23.2	662	75.7	617	20.1		1.6	7.20544
UD56	51		128	207	0.618357		0.829386	0.0530283	0.09701	0.00393542	0.0622917	0.00254656	0.192223	0.316501		613.3	29.4	596.9	23.1	683.2	87.3	602.6	19.9		2.7	12.6317
UD56	52		92	180	0.511111		0.824423	0.0501383	0.0987147	0.00373681	0.0605039	0.00212656	0.122305	0.37379		610.5	27.9	606.9	21.9	620.7	75.9	608.2	18.2		0.41	2.2233
UD56	53		76	152	0.5		0.821568	0.0506585	0.0974162	0.00383365	0.0608187	0.002156	0.170962	0.375827		608.9	28.2	599.2	22.5	631.9	76.3	602.8	19.1		0.95	5.17487
UD56	54		44	101	0.435644		0.813138	0.0572949	0.0967057	0.00389926	0.060824	0.00293999	0.200801	0.216185		604.2	32.1	595.1	22.9	632	104.1	597.8	20.4		1.2	5.83861
UD56	55		195	260	0.75		0.829983	0.0506475	0.0990859	0.00416817	0.0606289	0.00193525	0.484856	0.378838		613.6	28.1	609.1	24.4	625.1	68.8	610.7	22.4		0.47	2.55959
UD56	56		299	415	0.720482		0.829912	0.0517593	0.0976086	0.00378944	0.061391	0.00194758	0.229777	0.428243		613.6	28.7	600.4	22.3	652	68.1	604.8	19.5		1.6	7.91411
UD56	57		177	177	1		0.86199	0.0538191	0.0999579	0.00408649	0.0625299	0.00234717	0.231905	0.41675		631.2	29.3	614.2	23.9	691.3	80	620.4	20.7		2.4	11.1529
UD56	58		125	175	0.714286		0.863288	0.0632298	0.100195	0.00421984	0.0622986	0.00318243	0.309936	0.192081		631.9	34.5	615.6	24.7	683.4	109.1	619.9	22.8		2.2	9.92098
UD56	59		65	141	0.460993		0.808083	0.0492987	0.0979011	0.00374259	0.0599003	0.00209456	0.174468	0.314584		601.4	27.7	602.1	22	599	75.7	601.8	18.6		-0.094	-0.517529
UD56	60		28	51	0.54902		0.852668	0.0634534	0.101361	0.00421068	0.0612832	0.00336155	0.143176	0.26944		626.1	34.8	622.4	24.6	648.2	117.8	623.5	21.4		0.87	3.98025
UD56	61		142	206	0.68932		0.824265	0.0491298	0.09784	0.0037206	0.0609586	0.00186792	0.236052	0.334786		610.4	27.3	601.7	21.8	636.8	65.9	604.8	19		1.1	5.51193
UD56	62		50	64	0.78125		0.874814	0.0751509	0.100815	0.00492531	0.0623366	0.00405029	0.379877	0.160519		638.2	40.7	619.2	28.8	684.7	138.7	623.6	27.4		2.1	9.56623
UD56	63		86	138	0.623188		0.872326	0.0540748	0.102141	0.00386404	0.0614766	0.00211787	0.24554	0.211867		636.8	29.3	626.9	22.6	655	73.9	630.2	19.9		0.82	4.29008
UD56	64		86	155	0.554839		0.822009	0.0492491	0.0979325	0.00378633	0.0606756	0.00192736	0.224835	0.384557		609.2	27.4	602.3	22.2	626.8	68.5	604.8	19.1		0.72	3.90874
UD56	65		135	154	0.876623		0.815176	0.0501499	0.0972824	0.00372815	0.0605438	0.00205711	0.264745	0.248757		605.4	28.1	598.5	21.9	622.1	73.3	600.8	19.4		0.7	3.7936
UD56	66		290	210	1.38095		1.00072	0.0619217	0.106694	0.00442614	0.0682013	0.00284645	-0.0224201	0.614134		704.2	31.4	653.5	25.8	873.7	86.4	673.4	20		6.9	25.2032
UD56	67		89	125	0.712		0.849903	0.0539456	0.0989768	0.00382818	0.0619734	0.00225954	0.25509	0.250801		624.6	29.6	608.4	22.5	672.2	78	613.5	20		2	9.49122
UD56	68		79	165	0.478788		0.856198	0.0520559	0.101084	0.00387237	0.0613772	0.00204455	0.238857	0.28143		628	28.5	620.8	22.7	651.5	71.5	623.3	19.7		0.94	4.7122
UD56	69		188	246	0.764228		0.841476	0.0498583	0.0942478	0.0037194	0.0647002	0.00194964	0.309653	0.358505		620	27.5	580.6	21.9	763.6	63.5	593.4	19.8		5.8	23.9654
UD56	70		215	300	0.716667		0.858076	0.0525722	0.10008	0.00411064	0.062253	0.00224078	0.236093	0.4566		629.1	28.7	614.9	24.1	681.9	76.9	620.3	20.6		2.1	9.82549
UD56	71		214	287	0.745645		0.831337	0.0501305	0.0987243	0.00393658	0.061264	0.00210153	0.169408	0.47517		614.4	27.8	606.9	23.1	647.5	73.7	609.8	19.2		1.3	6.27027
UD56	72		102	126	0.809524		0.83022	0.0549954	0.097753	0.00408463	0.0620903	0.00282169	0.139193	0.421626		613.7	30.5	601.2	24	676.2	97.2	605.7	20.2		2.4	11.0914
UD56	73		180	241	0.746888		0.82952	0.0495862	0.0977985	0.00388415	0.0614332	0.00188932	0.359683	0.353776		613.3	27.5	601.5	22.8	653.5	66	605.7	20.5		1.6	7.95715
UD56	74		152	233	0.652361		0.833142	0.0492296	0.0997017	0.00391075	0.0606116	0.00175981	0.428984	0.296333		615.4	27.3	612.7	22.9	624.5	62.6	613.6	20.9		0.37	1.88951
UD56	75		99	188	0.526596		0.829419	0.0486134	0.0984577	0.00381596	0.0612718	0.00180774	0.318501	0.38985		613.3	27	605.4	22.4	647.8	63.4	608.2	19.8		1.3	6.54523
UD56	76		119	110	1.08182		0.825584	0.0612547	0.0975172	0.00419797	0.0613381	0.00319488	0.323091	0.293863		611.2	34.1	599.8	24.7	650.1	111.8	602.9	22.8		1.6	7.73727
UD56	77		74	134	0.552239		0.851267	0.0510942	0.100508	0.00381553	0.0611566	0.00188225	0.296207	0.269515		625.3	28	617.4	22.4	643.8	66.1	620.1	19.8		0.78	4.10065
UD56	78		118	176	0.670455		0.836834	0.0502895	0.101576	0.00389488	0.059927	0.00193921	0.235368	0.310001		617.4	27.8	623.6	22.8	600	70.1	621.3	19.5		-0.7	-3.93333
UD56	79		65	119	0.546218		0.824935	0.0515371	0.0995609	0.00401381	0.0608173	0.00230347	0.302953	0.386939		610.8	28.7	611.8	23.5	631.8	81.6	611.5	20.7		0.8	3.16556
UD56	80		77	122	0.631148		0.789353	0.0488731	0.0947655	0.00381108	0.0604596	0.00223088	0.158429	0.407958		590.8	27.7	583.7	22.4	619.1	79.6	586.3	18.8		1.1	5.71798
UD56	81		88	133	0.661654		0.821833	0.0497208	0.0970041	0.00374057	0.0618544	0.00210072	0.256611	0.341008		609.1	27.7	596.8	22	668.1	72.7	601	19.3		2.3	10.6721
UD56	82		65	126	0.515873		0.822263	0.0534723	0.0970266	0.00413017	0.0628105	0.0028377	0.212774	0.372038		609.3	29.8	597	24.3	700.8	96.2	601.5	20.8		3.5	14.8116
UD56	83		101	124	0.814516		0.822524	0.0504314	0.0964487	0.00373823	0.0614	0.00219654	0.0176167	0.48235		609.5	28.1	593.6	22	652.3	76.8	599.5	17.5		1.7	8.99893
UD56	84		142	260	0.546154		0.874952	0.061734	0.10283	0.00483589	0.0617456	0.00286174	0.429325	0.343025		638.3	33.4	631	28.3	664.4	99.3	633.5	25.8		1	5.02709
UD56	85		54	117	0.461538		0.838931	0.0526719	0.0995927	0.00394296	0.0616406	0.00235777	0.191172	0.348184		618.6	29.1	612	23.1	660.7	82	614.4	19.7		1.6	7.37097
UD56	86		638	387	1.64858		0.882259	0.0540585	0.0891683	0.00369864	0.0723438	0.00253699	0.31783	0.325535		642.2	29.2	550.6	21.9	994.7	71.3	574.7	20.6		15	44.6466
UD56	87		116	127	0.913386		0.814376	0.0557867	0.0969539	0.00409111	0.0610919	0.00291911	0.147104	0.381022		604.9	31.2	596.5	24	641.5	102.7	599.5	20.4		1.4	7.01481
UD56	88		105	188	0.558511		0.827419	0.050835	0.0974175	0.00395943	0.0622327	0.00232727	0.186745	0.44323		612.2	28.2	599.3	23.3	681.2	79.9	604.1	19.6		2.6	12.0229
UD56	89		142	172	0.825581		0.830482	0.051687	0.0982043	0.00388372	0.0612821	0.00208907	0.365004	0.278582		613.9	28.7	603.9	22.8	648.2	73.2	607.1	20.8		1.4	6.83431
UD56	90		119	170	0.7		0.850908	0.0513056	0.100873	0.00384733	0.0612836	0.00202427	0.250458	0.301676		625.1	28.1	619.5	22.5	648.3	70.9	621.5	19.6		0.91	4.44239
UD56	91		46	117	0.393162		0.818315	0.0507792	0.098471	0.00387071	0.0605884	0.00224862	0.129947	0.397196		607.1	28.4	605.4	22.7	623.7	80	606.1	18.8		0.63	2.9341
UD56	92		89	169	0.526627		0.831181	0.0507302	0.0998241	0.00392005	0.060374	0.00199073	0.297864	0.314529		614.3	28.1	613.4	23	616	71.2	613.7	20.2		0.077	0.422078
UD56	93		31	55	0.563636		0.822029	0.0578825	0.0965146	0.00400755	0.0626463	0.00323607	0.102868	0.409819		609.2	32.3	594	23.6	695.3	110.1	598.9	20		3.4	14.5693
UD56	94		43	50	0.86		0.825085	0.0589686	0.0981128	0.00404808	0.0614512	0.00315472	0.155533	0.281134		610.9	32.8	603.3	23.8	654.1	110.2	605.7	20.6		1.7	7.7664
UD56	95		158	214	0.738318		0.838004	0.0516164	0.0985535	0.00391488	0.0616416	0.00218896	0.171073	0.407862		618	28.5	605.9	23	660.7	76.1	610.4	19.4		1.7	8.29423
UD56	96		123	190	0.647368		0.828162	0.0528535	0.0983857	0.00406025	0.0609389	0.00218412	0.42113	0.249171		612.6	29.4	604.9	23.8	636.1	77.1	607.4	22		0.96	4.90489
UD56	97		97	169	0.573964		0.84182	0.0507933	0.10015	0.00395383	0.0610106	0.00207734	0.178797	0.429868		620.1	28	615.3	23.2	638.7	73.2	617.2	19.4		0.72	3.66369
UD56	98		67	82	0.817073		0.939669	0.0690749	0.106007	0.00501549	0.0636085	0.00340044	0.15701	0.414004		672.7	36.2	649.5	29.2	727.7	113.3	658.1	24.6		2.3	10.7462
UD56	99		94	117	0.803419		0.847284	0.0533408	0.0993912	0.00395921	0.0614733	0.00215789	0.304677	0.291201		623.2	29.3	610.8	23.2	654.9	75.3	614.9	20.8		1.3	6.73385
UD56	100		33	68	0.485294		0.836083	0.0553997	0.0998144	0.00396511	0.06067	0.00254	0.189323	0.320877		617	30.6	613.3	23.2	626.6	90.2	614.5	20.1		0.4	2.12257
UD56	101		4	172	0.0232558		0.839634	0.0513266	0.0998295	0.0038834	0.0608071	0.00210571	0.210601	0.362827		618.9	28.3	613.4	22.8	631.4	74.6	615.4	19.5		0.53	2.85081
UD56	102		216	196	1.10204		0.892961	0.0546859	0.106372	0.00416377	0.0607817	0.0020107	0.327626	0.268279		648	29.3	651.6	24.3	630.6	71.3	650.3	21.4		-0.68	-3.33016
UD56	103		86	196	0.438776		0.784458	0.0472125	0.0949886	0.00368699	0.0599341	0.00190887	0.312085	0.318225		588	26.9	585	21.7	600.2	69	586	19.3		0.48	2.53249
UD56	104		112	116	0.965517		0.807002	0.0521124	0.0951992	0.00373742	0.06141	0.00255	0.0540548	0.448144		600.8	29.3	586.2	22	652.7	89.1	591.3	18.1		2.1	10.1884
UD56	105		29	62	0.467742		0.865471	0.0707626	0.0967618	0.0043273	0.0655314	0.00473318	-0.165552	0.512829		633.1	38.5	595.4	25.4	790.5	151.6	607.6	19.7		6.3	24.6806
UD56	106		92	138	0.666667		0.874462	0.0575507	0.10111	0.00406741	0.0628446	0.00264668	0.256965	0.224282		638	31.2	620.9	23.8	702	89.7	626.4	21.2		2.6	11.5527
UD56	107		193	248	0.778226		0.822608	0.0485555	0.0987234	0.00375735	0.0601717	0.00172355	0.354091	0.272467		609.5	27.1	606.9	22	608.8	61.9	607.8	19.8		0.11	0.312089
UD56	108		63	111	0.567568		0.838052	0.0542268	0.099885	0.00413878	0.0607334	0.0021965	0.411435	0.143833		618.1	30	613.7	24.3	628.8	77.9	615.1	22.3		0.45	2.4014
UD56	110		67	78	0.858974		0.880627	0.0571751	0.101574	0.00419698	0.0635895	0.00268459	0.186737	0.380614		641.3	30.9	623.6	24.6	727.1	89.5	629.9	21		3.4	14.2346
UD56	111		192	241	0.79668		0.799627	0.0475778	0.0973692	0.00375301	0.0593932	0.00181205	0.314483	0.345509		596.6	26.8	599	22	580.6	66.3	598.1	19.4		-0.61	-3.16914
UD56	112		127	239	0.531381		0.805176	0.0614878	0.0963078	0.00481388	0.0610998	0.00319888	0.43092	0.104755		599.7	34.6	592.7	28.3	641.8	112.6	595	26.1		1.6	7.65036
UD56	113		124	203	0.610837		0.908429	0.0615662	0.10099	0.00457706	0.0657216	0.00337843	0.0841125	0.499166		656.2	32.8	620.2	26.8	796.6	107.8	634	21.8		5.6	22.1441
UD56	114		74	167	0.443114		0.841524	0.0516831	0.0984715	0.00382237	0.061841	0.00213649	0.21429	0.341155		620	28.5	605.4	22.4	667.7	73.9	610.5	19.4		1.9	9.33054
UD56	115		69	114	0.605263		0.808334	0.0513256	0.0967909	0.00382529	0.0603446	0.00228774	0.172385	0.344633		601.5	28.8	595.6	22.5	615	81.9	597.7	19.2		0.57	3.15447
UD56	116		174	297	0.585859		0.816968	0.0507329	0.0969361	0.00384347	0.061284	0.00214758	0.384892	0.247513		606.4	28.4	596.4	22.6	648.3	75.3	599.6	20.7		1.7	8.00555
UD56	117		178	274	0.649635		0.804932	0.0474646	0.0969755	0.00372085	0.0602018	0.00176498	0.342755	0.28804		599.6	26.7	596.7	21.9	609.9	63.4	597.7	19.5		0.41	2.16429
UD56	118		192	188	1.02128		0.859778	0.0566382	0.100864	0.00431841	0.0616587	0.00229092	0.473156	0.208392		630	30.9	619.5	25.3	661.3	79.6	622.7	23.7		1.3	6.32088
UD56	119		66	126	0.52381		0.804628	0.0515114	0.0977762	0.00398937	0.0599032	0.00220312	0.405725	0.202055		599.4	29	601.4	23.4	599.1	79.6	600.7	21.4		-0.079	-0.383909
UD56	120		94	159	0.591195		0.830249	0.0505936	0.0995943	0.00389059	0.0607116	0.00208474	0.207318	0.350773		613.8	28.1	612	22.8	628.1	74	612.7	19.4		0.54	2.56329
UD56	121		210	287	0.731707		0.815424	0.0482482	0.0977109	0.00386142	0.0603096	0.00171522	0.43823	0.295415		605.5	27	601	22.7	613.7	61.4	602.5	20.7		0.37	2.06942
UD56	122		40	50	0.8		0.83206	0.0604257	0.0965321	0.00418658	0.0634453	0.00337658	0.220731	0.240524		614.8	33.5	594.1	24.6	722.2	112.9	600.3	21.9		4.3	17.7375
UD56	123		178	226	0.787611		0.813875	0.0486568	0.096986	0.00377127	0.0606516	0.00178581	0.390131	0.2682		604.6	27.2	596.7	22.2	625.9	63.5	599.3	20.2		0.88	4.66528
UD56	124		96	121	0.793388		0.796716	0.0503011	0.0984683	0.00393435	0.0588513	0.00217322	0.267965	0.281484		595	28.4	605.4	23.1	560.6	80.5	601.6	20		-1.4	-7.99144
UD56	125		116	153	0.75817		0.80518	0.051314	0.0971845	0.00388682	0.0604014	0.00236276	0.194537	0.367571		599.7	28.9	597.9	22.8	617	84.5	598.6	19.5		0.65	3.09562
UD56	126		103	160	0.64375		0.902582	0.0672366	0.0950995	0.00401622	0.0684771	0.00359475	0.191515	0.233386		653.1	35.9	585.6	23.6	882.1	108.6	601.8	21.7		9.9	33.613
UD56	127		80	170	0.470588		0.841129	0.0550853	0.100032	0.0042665	0.0611257	0.00242503	0.382181	0.271656		619.8	30.4	614.6	25	642.7	85.3	616.4	22.6		0.9	4.37218
UD56	21b		102	216	0.472222		0.82529	0.0481014	0.10002	0.00373877	0.0599559	0.0017407	0.191802	0.354359		611	26.8	614.5	21.9	601	62.9	613.2	18.4		-0.4	-2.24626
UD56	79b		317	361	0.878116		0.845238	0.0519628	0.101987	0.00441345	0.0603963	0.00209854	0.409411	0.437249		622	28.6	626	25.8	616.8	75	624.4	22.7		-0.26	-1.49157
UD56	92a		90	185	0.486486		0.816718	0.0487158	0.0975474	0.00369976	0.0605057	0.00186121	0.277035	0.280078		606.2	27.2	600	21.7	620.7	66.4	602.2	19.1		0.61	3.33494
UD56	92b		117	211	0.554502		0.833085	0.0500837	0.0988249	0.00391288	0.0614277	0.0019587	0.351918	0.351571		615.3	27.7	607.5	23	653.3	68.4	610.3	20.5		1.5	7.01056
UD58	1		32	61	0.52459		0.784464	0.0594927	0.0980424	0.00183758	0.0586981	0.00242346	0.303889	0.0983937		588	33.9	602.9	10.8	554.9	90.1	602.8	10.8		-1.8	-8.65021
UD58	2		43	94	0.457447		0.815782	0.0614289	0.0987008	0.00178866	0.060331	0.00239543	0.288336	0.159781		605.7	34.4	606.8	10.5	614.5	85.7	606.8	10.5		0.29	1.25305
UD58	3		71	137	0.518248		0.838385	0.0628684	0.101174	0.00185686	0.060259	0.00235779	0.378195	0.0600603		618.3	34.7	621.3	10.9	611.9	84.6	621.4	10.8		-0.36	-1.5362
UD58	4		67	104	0.644231		0.820718	0.0609703	0.0990865	0.00169463	0.0597151	0.00224139	0.375036	0.0315262		608.4	34	609.1	9.9	592.3	81.4	609.1	9.9		-0.63	-2.8364
UD58	5		46	121	0.380165		0.804193	0.05911	0.098973	0.00171037	0.0590033	0.00212752	0.435883	0.0358896		599.2	33.3	608.4	10	566.2	78.5	608.8	9.9		-1.6	-7.4532
UD58	6		34	59	0.576271		0.824542	0.0636088	0.101219	0.00185757	0.0591454	0.00261924	0.439361	-0.0449263		610.6	35.4	621.5	10.9	571.5	96.3	622.1	10.8		-1.9	-8.74891
UD58	7		52	97	0.536082		0.837454	0.0631165	0.100156	0.00178627	0.0605437	0.00237398	0.433877	0.0423359		617.7	34.9	615.3	10.5	622.1	84.6	615.2	10.4		0.27	1.09307
UD58	8		58	79	0.734177		0.824824	0.0622491	0.100392	0.00193221	0.0597734	0.00244761	0.429057	0.00239811		610.7	34.6	616.7	11.3	594.4	88.8	616.9	11.2		-0.87	-3.75168
UD58	9		57	62	0.919355		0.851143	0.0656687	0.101212	0.00201197	0.0610715	0.00260658	0.349017	0.0936626		625.3	36	621.5	11.8	640.8	91.8	621.5	11.8		0.73	3.01186
UD58	10		276	690	0.4		0.832851	0.058509	0.100946	0.00139227	0.0594719	0.00154256	0.213843	0.36622		615.2	32.4	620	8.2	583.4	56.3	619.9	8.1		-1.4	-6.27357
UD58	11		54	130	0.415385		0.898771	0.0662584	0.106698	0.00191165	0.0607265	0.00206987	0.270043	0.250394		651.1	35.4	653.5	11.1	628.6	73.5	653.5	11.1		-0.94	-3.96118
UD58	12		131	192	0.682292		0.821115	0.0593767	0.0973901	0.00153672	0.061	0.00197599	0.328794	0.135972		608.7	33.1	599.1	9	638.3	69.7	598.9	9		1.5	6.14131
UD58	13		51	73	0.69863		0.844583	0.0645851	0.100019	0.00200065	0.061508	0.00259781	0.381769	0.0324529		621.7	35.6	614.5	11.7	656.1	90.6	614.4	11.7		1.6	6.3405
UD58	14		74	98	0.755102		0.815487	0.0634097	0.097758	0.00197664	0.0598846	0.00239333	0.0542787	-0.0286103		605.5	35.5	601.3	11.6	598.4	86.5	601.6	11.2		-0.15	-0.484626
UD58	15		30	53	0.566038		0.817944	0.0645644	0.100056	0.00192238	0.0590177	0.00270123	0.308002	0.071985		606.9	36.1	614.7	11.3	566.8	99.6	614.7	11.3		-1.8	-8.45095
UD58	16		68	96	0.708333		0.806469	0.0607873	0.0976624	0.00178646	0.060047	0.00238972	0.321052	0.110686		600.5	34.2	600.7	10.5	604.3	86.1	600.7	10.5		0.14	0.595731
UD58	17		80	87	0.91954		0.827087	0.0615929	0.0976868	0.00178443	0.0611563	0.00229111	0.416903	0.0512442		612	34.2	600.8	10.5	643.8	80.5	600.4	10.4		1.7	6.67909
UD58	18		19	62	0.306452		0.816266	0.0647428	0.0982606	0.00217141	0.0599711	0.00268817	0.314725	0.164396		606	36.2	604.2	12.7	601.6	97	604.2	12.7		-0.1	-0.432181
UD58	19		34	75	0.453333		0.847257	0.0644477	0.0995564	0.00202648	0.0623766	0.00265591	0.355691	0.112736		623.1	35.4	611.8	11.9	686.1	90.9	611.7	11.9		2.8	10.8293
UD58	20		58	92	0.630435		0.783115	0.0583368	0.0961462	0.00188834	0.0593388	0.00220682	0.31713	0.232979		587.3	33.2	591.8	11.1	578.6	80.8	591.8	11.1		-0.49	-2.28137
UD58	21		43	87	0.494253		0.780291	0.0591243	0.0964577	0.001908	0.0586186	0.00239333	0.431898	0.0288359		585.6	33.7	593.6	11.2	552	89.1	593.9	11.1		-1.6	-7.53623
UD58	22		69	104	0.663462		0.810949	0.0605039	0.0972011	0.00172464	0.0596696	0.00210325	0.241459	0.329385		603	33.9	598	10.1	590.7	76.4	598.1	10.1		-0.29	-1.23582
UD58	23		50	88	0.568182		0.827904	0.0622525	0.0995203	0.00179234	0.059779	0.00227299	0.347364	0.0789581		612.4	34.6	611.6	10.5	594.6	82.4	611.6	10.5		-0.64	-2.85906
UD58	24		157	246	0.638211		0.842744	0.0613292	0.101184	0.0019304	0.0604055	0.00212071	0.503074	0.0666505		620.7	33.8	621.3	11.3	617.1	75.8	621.4	11.1		-0.16	-0.680603
UD58	25		26	58	0.448276		0.833825	0.0650103	0.0989468	0.00215546	0.0617927	0.00294866	0.45037	0.0282796		615.7	36	608.2	12.6	666	102.2	607.9	12.6		2.2	8.67868
UD58	26		28	67	0.41791		0.847416	0.0681916	0.100888	0.00201502	0.0603457	0.00294936	0.366116	-0.010967		623.2	37.5	619.6	11.8	615	105.5	619.5	11.8		-0.17	-0.747967
UD58	27		62	110	0.563636		0.795931	0.059012	0.096616	0.00165928	0.0594067	0.00214751	0.344827	0.0738416		594.5	33.4	594.5	9.8	581.1	78.5	594.5	9.7		-0.51	-2.30597
UD58	28		93	172	0.540698		0.843067	0.0614374	0.0995503	0.00161129	0.0607589	0.00191308	0.239271	0.228714		620.8	33.8	611.8	9.4	629.7	67.8	611.9	9.4		0.67	2.84262
UD58	29		43	86	0.5		0.81683	0.0609081	0.0973582	0.00186736	0.0610714	0.00233303	0.444965	0.108861		606.3	34	598.9	11	640.8	82.1	598.5	10.9		1.6	6.5387
UD58	30		112	128	0.875		0.82736	0.061876	0.0992929	0.00179739	0.0603995	0.00230251	0.353087	0.106413		612.1	34.4	610.3	10.5	616.9	82.3	610.2	10.5		0.26	1.06987
UD58	31		131	217	0.603687		0.820942	0.0629108	0.0980848	0.00205442	0.0607656	0.00264087	0.415399	0.0309154		608.6	35.1	603.2	12.1	630	93.6	603	12		1	4.25397
UD58	32		131	190	0.689474		0.811223	0.0581828	0.0983741	0.00157616	0.0595077	0.00178845	0.319594	0.196106		603.1	32.6	604.9	9.2	584.8	65.2	604.9	9.2		-0.76	-3.43707
UD58	33		40	74	0.540541		0.825674	0.0646272	0.100557	0.0018739	0.0592468	0.00269304	0.430027	-0.0659045		611.2	35.9	617.7	11	575.2	98.8	618	10.9		-1.6	-7.38873
UD58	34		22	33	0.666667		0.837315	0.0738189	0.103066	0.0026283	0.0581158	0.0034942	0.344515	0.138636		617.7	40.8	632.4	15.4	533.2	131.6	632.1	15.3		-3.7	-18.6047
UD58	35		121	221	0.547511		0.836152	0.0667122	0.0901024	0.00214439	0.0668492	0.00285093	0.172262	0.4519		617	36.9	556.1	12.7	832.1	88.9	559.3	12.6		10	33.1691
UD58	36		82	102	0.803922		0.832199	0.0627055	0.0987249	0.00180941	0.0611298	0.00227414	0.192504	0.268321		614.8	34.8	606.9	10.6	642.8	80	607.2	10.5		1.3	5.58494
UD58	37		66	103	0.640777		0.808285	0.0606339	0.100302	0.00175525	0.0585176	0.0021142	0.169584	0.319318		601.5	34	616.2	10.3	548.2	78.9	615.6	10.2		-2.5	-12.4042
UD58	38		38	45	0.844444		0.832959	0.067944	0.0999771	0.00242041	0.0620463	0.00337715	0.384606	0.08782		615.3	37.6	614.3	14.2	674.7	116.4	614.3	14.2		2.3	8.95213
UD58	39		39	82	0.47561		0.834745	0.0653096	0.0980844	0.00201144	0.06191	0.00281404	0.411648	0.0204689		616.2	36.1	603.2	11.8	670	97.3	602.7	11.8		2.6	9.97015
UD58	40		45	58	0.775862		0.842955	0.0752105	0.0912227	0.00241199	0.0666134	0.00407355	0.247805	0.180666		620.8	41.4	562.8	14.2	824.8	127.6	564.4	14.2		9.9	31.7653
UD58	41		45	65	0.692308		0.819072	0.0654057	0.0963627	0.00201104	0.062106	0.00299334	0.350527	0.0307815		607.5	36.5	593.1	11.8	676.8	103	592.9	11.8		3.2	12.367
UD58	43		43	76	0.565789		0.842402	0.0655726	0.098697	0.00213809	0.061659	0.00257027	0.317572	0.166925		620.5	36.1	606.8	12.5	661.3	89.3	606.9	12.5		2.1	8.24134
UD58	44		103	123	0.837398		0.832738	0.0620063	0.100196	0.00190494	0.0609125	0.00229389	0.335778	0.155706		615.1	34.4	615.6	11.2	635.2	81.1	615.6	11.2		0.74	3.08564
UD58	45		38	123	0.308943		0.835447	0.0649445	0.100997	0.00194244	0.060058	0.00263528	0.406144	-0.0155376		616.6	35.9	620.2	11.4	604.7	94.9	620.4	11.3		-0.6	-2.56325
UD58	46		44	127	0.346457		0.81097	0.0616632	0.0987602	0.00188066	0.0600825	0.00247359	0.363668	0.0506373		603	34.6	607.1	11	605.6	89.1	607.2	11		-0.067	-0.247688
UD58	47		109	121	0.900826		0.892311	0.0667177	0.106447	0.00183554	0.0612404	0.00234818	0.403997	-0.0118006		647.6	35.8	652.1	10.7	646.7	82.4	652.2	10.6		-0.22	-0.835009
UD58	48		52	71	0.732394		0.810918	0.06131	0.09948	0.00184552	0.0595806	0.00233213	0.295574	0.134543		603	34.4	611.4	10.8	587.4	84.9	611.3	10.8		-0.9	-4.0858
UD58	49		92	173	0.531792		0.813942	0.0593034	0.0983005	0.00158054	0.0605633	0.0020456	0.313277	0.131577		604.7	33.2	604.4	9.3	622.8	72.9	604.4	9.3		0.69	2.9544
UD58	50		64	91	0.703297		0.82922	0.0627037	0.0990121	0.00178566	0.0611524	0.00239416	0.2175	0.210895		613.2	34.8	608.6	10.5	643.6	84.1	608.7	10.4		1.3	5.43816
UD58	51		73	155	0.470968		0.809814	0.0599153	0.0992908	0.00168891	0.0597714	0.00210468	0.20472	0.251886		602.3	33.6	610.3	9.9	594.3	76.3	610	9.9		-0.58	-2.69224
UD58	52		38	44	0.863636		0.807186	0.0660842	0.100037	0.00216446	0.0594057	0.00301411	0.267544	0.112822		600.9	37.1	614.6	12.7	581	110.2	614.2	12.6		-1.2	-5.78313
UD58	53		28	48	0.583333		0.829307	0.0677193	0.0996251	0.00206738	0.061715	0.00329804	0.478572	-0.10471		613.2	37.6	612.2	12.1	663.3	114.5	612.1	11.9		1.9	7.7039
UD58	54		11	29	0.37931		0.830062	0.0718625	0.102472	0.00263791	0.0591907	0.00359528	0.348847	0.0361854		613.6	39.9	628.9	15.4	573.2	132.1	628.6	15.4		-2.1	-9.71738
UD58	55		39	81	0.481481		0.791011	0.0616837	0.0971329	0.00187191	0.0595638	0.00257765	0.306764	0.114075		591.7	35	597.6	11	586.8	93.9	597.6	11		-0.4	-1.84049
UD58	56		46	86	0.534884		0.769956	0.0588969	0.0952935	0.0017333	0.0596374	0.00254016	0.320451	0.0717821		579.7	33.8	586.8	10.2	589.5	92.4	586.8	10.2		0.097	0.458015
UD58	57		113	311	0.363344		0.813522	0.0582136	0.0993964	0.00151654	0.059977	0.00182433	0.30962	0.163748		604.4	32.6	610.9	8.9	601.8	65.8	610.9	8.9		-0.35	-1.51213
UD58	58		130	337	0.385757		0.74814	0.0536249	0.0909973	0.00138381	0.0602009	0.00184486	0.337606	0.153677		567.1	31.1	561.4	8.2	609.8	66.2	561.3	8.2		1.8	7.93703
UD58	59		39	67	0.58209		0.811164	0.0617899	0.0989017	0.00190385	0.060557	0.00254642	0.398605	0.0237513		603.1	34.6	608	11.2	622.6	90.7	608.1	11.1		0.54	2.345
UD58	60		76	172	0.44186		0.836093	0.0612569	0.099703	0.00155593	0.0614267	0.00210396	0.269953	0.150576		617	33.9	612.7	9.1	653.3	73.5	612.7	9.1		1.5	6.2146
UD58	61		88	102	0.862745		0.878638	0.0736404	0.103576	0.0025811	0.0617106	0.00335707	0.467981	-0.0452164		640.2	39.8	635.3	15.1	663.1	116.5	635.1	15		1.1	4.19243
UD58	62		107	150	0.713333		0.857355	0.0625665	0.102054	0.00173301	0.0618757	0.00214885	0.407643	0.0886054		628.7	34.2	626.4	10.1	668.9	74.3	626.3	10.1		1.6	6.35372
UD58	63		295	549	0.537341		0.781655	0.0572478	0.0627414	0.00198347	0.0915457	0.00346848	0.669777	0.439255		586.4	32.6	392.3	12	1457.1	72	356.8	10.9		48	73.0767
UD58	64		222	298	0.744966		0.826778	0.0590814	0.0986427	0.00154499	0.0616487	0.00184695	0.360777	0.135967		611.8	32.8	606.5	9.1	661	64.2	606.3	9		2.1	8.24508
UD58	65		43	44	0.977273		0.816209	0.0656502	0.0971742	0.00210069	0.0616707	0.00300045	0.384771	0.0963723		605.9	36.7	597.8	12.3	661.8	104.2	597.7	12.3		2.4	9.6706
UD58	66		117	188	0.62234		0.810024	0.0599929	0.0966956	0.00172613	0.0613516	0.00213539	0.173105	0.313583		602.5	33.7	595	10.1	650.6	74.7	595.3	10.1		2.1	8.54596
UD58	67		48	70	0.685714		0.800349	0.06388	0.0972299	0.00188798	0.061616	0.00302723	0.232848	0.105314		597	36	598.2	11.1	659.8	105.3	598.1	11.1		2.3	9.33616
UD58	68		467	447	1.04474		0.827173	0.0601527	0.0991691	0.00167243	0.0612443	0.00198835	0.267514	0.268689		612	33.4	609.5	9.8	646.8	69.7	609.6	9.8		1.4	5.76685
UD58	69		45	59	0.762712		0.792031	0.0627035	0.0988531	0.00199932	0.059447	0.00287178	0.403417	-0.0526787		592.3	35.5	607.7	11.7	582.5	104.9	608.1	11.7		-0.99	-4.32618
UD58	70		53	83	0.638554		0.833095	0.0639454	0.099139	0.00189888	0.0613163	0.00251957	0.335613	0.138597		615.3	35.4	609.4	11.1	649.4	88.3	609.3	11.1		1.5	6.15953
UD58	71		232	277	0.837545		0.806797	0.0608199	0.0973936	0.00182461	0.0608265	0.00226882	0.164983	0.316773		600.7	34.2	599.1	10.7	632.1	80.3	599.2	10.6		1.2	5.22069
UD58	72		34	36	0.944444		0.863382	0.0708879	0.103115	0.0024994	0.0617776	0.00323748	0.404852	0.0868479		632	38.6	632.6	14.6	665.5	112.2	632.6	14.6		1.2	4.94365
UD58	73		31	66	0.469697		0.823365	0.0652262	0.100314	0.00208832	0.0606243	0.0028755	0.395881	-0.000500818		609.9	36.3	616.2	12.2	625	102.3	616.4	12.2		0.31	1.408
UD58	74		51	140	0.364286		0.866376	0.0644761	0.10222	0.00177014	0.0623748	0.00230631	0.308339	0.125144		633.6	35.1	627.4	10.4	686	78.9	627.4	10.4		2.2	8.54227
UD58	75		159	186	0.854839		0.848459	0.0617217	0.100208	0.00165111	0.0619902	0.00210053	0.3739	0.0978096		623.8	33.9	615.6	9.7	672.8	72.5	615.4	9.6		2.2	8.50178
UD58	76		47	88	0.534091		0.831301	0.0638874	0.0993782	0.00189369	0.0614076	0.00251088	0.153999	0.269639		614.3	35.4	610.8	11.1	652.6	87.8	610.9	11		1.6	6.40515
UD58	77		29	59	0.491525		0.826589	0.0660899	0.0996397	0.0021405	0.0609158	0.00295446	0.329424	0.16413		611.7	36.7	612.3	12.6	635.3	104.4	612.3	12.5		0.87	3.62034
UD58	78		233	206	1.13107		0.893386	0.0647619	0.105077	0.00162902	0.062023	0.00204465	0.359095	0.0943195		648.2	34.7	644.1	9.5	673.9	70.5	644	9.5		1.1	4.42202
UD58	79		46	87	0.528736		0.860662	0.0676783	0.099768	0.00216428	0.0634599	0.00299936	0.429025	-0.0164353		630.5	36.9	613	12.7	722.7	100.3	612.4	12.6		4.3	15.1792
UD58	80		20	41	0.487805		0.82594	0.0695024	0.100525	0.00244617	0.0604668	0.0034618	0.414045	-0.0250863		611.4	38.6	617.5	14.3	619.4	123.6	617.6	14.3		0.06	0.306748
UD58	81		36	111	0.324324		0.815606	0.0644965	0.100762	0.0021793	0.0592395	0.00291219	0.424035	0.0138572		605.6	36.1	618.9	12.8	574.9	106.9	619.2	12.7		-1.7	-7.6535
UD58	82		93	168	0.553571		0.838548	0.0612729	0.100519	0.00164321	0.0608865	0.00206426	0.26157	0.218063		618.3	33.8	617.4	9.6	634.3	73	617.5	9.6		0.64	2.66435
UD58	83		55	84	0.654762		0.819356	0.0626336	0.10137	0.00185089	0.0588826	0.00240904	0.284723	0.0893062		607.7	35	622.4	10.8	561.8	89.1	622.3	10.8		-2.3	-10.7868
UD58	84		14	33	0.424242		0.806774	0.0697475	0.0979017	0.00246456	0.0606841	0.00359712	0.327355	0.0719331		600.6	39.2	602.1	14.5	627.1	127.8	602.1	14.5		0.95	3.98661
UD58	85		54	56	0.964286		0.828057	0.0688579	0.0966418	0.00236032	0.0629327	0.00353012	0.356065	0.102972		612.5	38.2	594.7	13.9	705	119.3	594.7	13.9		4.2	15.6454
UD58	86		88	187	0.470588		0.839798	0.0611918	0.0992306	0.00154824	0.0614891	0.00210273	0.374589	0.0170103		619	33.8	609.9	9.1	655.4	73.4	609.6	9		1.8	6.94233
UD58	87		10	44	0.227273		0.848615	0.0682203	0.102513	0.00239665	0.0604984	0.00312803	0.45183	-0.0111377		623.9	37.5	629.1	14	620.5	111.6	629.3	14		-0.35	-1.38598
UD58	88		21	41	0.512195		0.89247	0.0723595	0.104248	0.00228211	0.0625575	0.00317282	0.383884	0.0516888		647.7	38.8	639.3	13.3	692.3	108.1	639.1	13.3		2	7.65564
UD58	89		39	72	0.541667		0.861575	0.0658524	0.10007	0.00194067	0.0627697	0.00273254	0.453516	-0.0392328		631	35.9	614.8	11.4	699.5	92.7	613.9	11.2		3.3	12.1086
UD58	90		106	169	0.627219		0.850644	0.0629974	0.102019	0.0016523	0.0605309	0.00222337	0.325533	0.0594512		625	34.6	626.2	9.7	621.6	79.2	626.2	9.7		-0.18	-0.740026
UD58	91		50	141	0.35461		0.859413	0.0644499	0.10383	0.0017977	0.0599205	0.00222711	0.186063	0.201179		629.8	35.2	636.8	10.5	599.7	80.5	636.6	10.4		-1.4	-6.18643
UD58	92		93	261	0.356322		0.864791	0.0624622	0.10325	0.00165964	0.0604801	0.00192354	0.366369	0.146239		632.7	34	633.4	9.7	619.8	68.6	633.4	9.7		-0.52	-2.19426
UD58	93		163	168	0.970238		0.929103	0.0788228	0.0914707	0.00263428	0.0738971	0.00447849	0.426046	0.0754792		667.2	41.5	564.2	15.6	1037.7	122.4	560.3	15.6		19	45.6298
UD58	94		49	83	0.590361		0.84068	0.0650278	0.10017	0.00201722	0.060883	0.00266074	0.338565	0.123203		619.5	35.9	615.4	11.8	634.1	94.1	615.4	11.8		0.71	2.94906
UD58	3b		32	61	0.52459		0.838506	0.0644017	0.0978046	0.00205436	0.0622684	0.0026281	0.387861	0.11246		618.3	35.6	601.5	12.1	682.4	90.1	601.2	12.1		3.1	11.8552
UD58	43b		79	71	1.11268		0.838217	0.0633313	0.0977223	0.00186072	0.0630955	0.00262171	0.389303	0.038492		618.2	35	601	10.9	710.5	88.3	600.5	10.9		4.2	15.4117
UD59	1		42	84	0.5		0.82914	0.0341768	0.0985792	0.00294814	0.0605369	0.00192258	0.267575	0.23061		613.1	19	606.1	17.3	621.9	68.5	609.1	14.4		0.46	2.5406
UD59	2		131	239	0.548117		0.815149	0.030245	0.0972233	0.00286053	0.0610401	0.00179227	0.297749	0.196683		605.3	16.9	598.1	16.8	639.7	63.1	601.7	13.6		1.3	6.50305
UD59	3		47	80	0.5875		0.819112	0.0329562	0.100014	0.00300702	0.0593203	0.00189771	0.320695	0.210192		607.6	18.4	614.5	17.6	577.9	69.5	611.2	14.6		-1.1	-6.33328
UD59	4		16	29	0.551724		0.84307	0.0496596	0.0999758	0.00326485	0.0618286	0.00340098	0.293796	0.11843		620.8	27.4	614.3	19.1	667.2	117.8	616	17.7		1.8	7.92866
UD59	5		78	110	0.709091		0.806677	0.0312355	0.0986151	0.00290531	0.059097	0.00181122	0.338808	0.200566		600.6	17.6	606.3	17	569.7	66.7	603.6	14.1		-1.1	-6.42443		x
UD59	6		28	37	0.756757		0.843859	0.0434901	0.0992017	0.0032142	0.0614556	0.00278703	0.342538	0.09183		621.3	23.9	609.7	18.8	654.3	97.3	613.4	17.1		1.4	6.81645
UD59	7		113	158	0.71519		6.27847	0.177908	0.364968	0.00994253	0.123915	0.00148169	0.393029	0.465784		2015.5	24.8	2005.7	47	2012.6	21.2	2014.6	24.6		0.48	0.34284		x
UD59	8		53	82	0.646341		0.829229	0.0306108	0.0978709	0.00286936	0.0614672	0.00188812	0.404505	0.0385425		613.2	17	601.9	16.8	654.7	65.9	607.4	14.3		1.6	8.06476
UD59	9		204	427	0.477752		0.854218	0.0317358	0.0928677	0.00312733	0.0668508	0.00194482	0.420645	0.257925		627	17.4	572.5	18.4	832.2	60.6	601.3	15.5		7.7	31.2064
UD59	10		44	80	0.55		0.83144	0.035009	0.0988826	0.00291206	0.0608635	0.00221335	0.417883	0.0565534		614.4	19.4	607.9	17.1	633.4	78.3	610.4	15.3		0.76	4.02589		x
UD59	11		44	100	0.44		0.814934	0.0305525	0.0964927	0.00278836	0.0611323	0.00183157	0.406505	0.0464843		605.2	17.1	593.8	16.4	642.9	64.4	599.1	14.1		1.4	7.63727
UD59	12		27	50	0.54		0.816203	0.0362196	0.0979007	0.0030213	0.0613336	0.00258924	0.405215	0.0331685		605.9	20.2	602.1	17.7	650	90.6	603.6	15.8		1.7	7.36923
UD59	13		28	51	0.54902		0.798724	0.0356581	0.0987305	0.00306449	0.0587029	0.002309	0.382851	0.0988058		596.1	20.1	607	18	555.1	85.8	602.5	15.7		-1.6	-9.34967
UD59	14		40	113	0.353982		0.85051	0.032137	0.099871	0.0030328	0.060878	0.00171778	0.362231	0.272642		624.9	17.6	613.7	17.8	634	60.8	619.3	14.7		0.7	3.20189
UD59	15		35	63	0.555556		0.799779	0.0367542	0.0984253	0.0029925	0.058918	0.00227465	0.239879	0.174319		596.7	20.7	605.2	17.6	563.1	84.1	601.8	14.8		-1.3	-7.47647
UD59	16		38	59	0.644068		0.825657	0.0384664	0.098807	0.0028646	0.0601084	0.00236512	0.294884	0.0719424		611.2	21.4	607.4	16.8	606.5	85.1	608.7	15		-0.23	-0.148392
UD59	17		111	203	0.546798		0.815279	0.0269134	0.0986226	0.00279146	0.0596034	0.00129474	0.376233	0.240055		605.4	15.1	606.3	16.4	588.2	47.1	605.8	13		-0.63	-3.07718
UD59	18		29	94	0.308511		0.827807	0.031332	0.0976185	0.00283621	0.0613927	0.00184306	0.358384	0.102653		612.4	17.4	600.4	16.7	652.1	64.4	606	14.1		1.5	7.92823
UD59	20		51	67	0.761194		0.772142	0.0373429	0.0971616	0.0030182	0.0574135	0.0025008	0.405959	0.0424916		581	21.4	597.8	17.7	506.4	95.8	591.8	16		-2.9	-18.049
UD59	21		47	65	0.723077		0.803463	0.0356626	0.0972322	0.00297588	0.0602099	0.00232067	0.359546	0.0472343		598.8	20.1	598.2	17.5	610.2	83.3	598.4	15.3		0.43	1.96657		x
UD59	22		26	61	0.42623		0.856587	0.0373548	0.0993127	0.00294612	0.0625201	0.00234628	0.321672	0.111586		628.3	20.4	610.4	17.3	691	80	617	15.2		2.5	11.6643
UD59	23		52	56	0.928571		0.778182	0.0363504	0.0966009	0.00298274	0.0584945	0.00232879	0.252225	0.168599		584.4	20.8	594.5	17.5	547.4	87	590.5	14.9		-1.4	-8.60431
UD59	24		41	80	0.5125		0.815421	0.0329139	0.0966248	0.00281258	0.061227	0.00197588	0.234738	0.192644		605.5	18.4	594.6	16.5	646.3	69.3	599.2	13.7		1.6	7.99938
UD59	25		66	73	0.90411		0.81849	0.0339081	0.0967446	0.002849	0.0611209	0.00211192	0.340826	0.113611		607.2	18.9	595.3	16.7	642.5	74.3	600.1	14.6		1.4	7.3463
UD59	26		51	159	0.320755		0.827231	0.0282455	0.100098	0.00283034	0.0598667	0.00146186	0.375757	0.100775		612.1	15.7	615	16.6	597.8	52.9	613.4	13.3		-0.52	-2.87722
UD59	27		71	138	0.514493		0.804803	0.0283129	0.0983005	0.00279625	0.0591902	0.00149076	0.352809	0.166132		599.5	15.9	604.4	16.4	573.1	54.8	601.9	13.3		-0.95	-5.46153
[truncated: 409 more rows]

## Sheet: Lu-Hf isotopic data
Sample	meas. name	Original name	age	StdCorr_176Hf_177Hf	2SE	Lu176_Hf177_Corr	2SE	176Hf_177Hfi	2SE	eHf	2SE	Hf TDM (Ma)
UD52	UD52_1	UD52_1	608.3	0.282573	2.9e-05	0.00076	1.2e-05	0.282564	2.9e-05	6.06	1.03	945.87
UD52	UD52_2	UD52_2	602.8	0.282611	2.9e-05	0.000826	6e-06	0.282602	2.9e-05	7.26	1.03	894.75
UD52	UD52_3	UD52_18	594.2	0.282638	2.9e-05	0.000312	7e-06	0.282635	2.9e-05	8.23	1.03	845.89
UD52	UD52_4	UD52_35	579.1	0.282567	2.5e-05	0.000754	1.1e-05	0.282559	2.5e-05	5.22	0.89	954.03
UD52	UD52_5	UD52_44	606.5	0.282605	3.1e-05	0.000896	1.3e-05	0.282595	3.1e-05	7.1	1.1	904.75
UD52	UD52_6	UD52_46	602.1	0.282643	2.6e-05	0.000548	2e-06	0.282637	2.6e-05	8.49	0.92	844.16
UD52	UD52_7	UD52_55	602.1	0.282568	2.5e-05	0.000689	3e-06	0.28256	2.5e-05	5.78	0.89	951.04
UD52	UD52_8	UD52_57	548.9	0.28259	3.3e-05	0.001303	1.6e-05	0.282577	3.3e-05	5.18	1.17	935.57
UD52	UD52_9	UD52_68	614.9	0.282582	3.1e-05	0.001066	1.4e-05	0.28257	3.1e-05	6.4	1.1	940.91
UD52	UD52_10	UD52_78	601	0.282525	2.6e-05	0.000602	8e-06	0.282518	2.6e-05	4.26	0.92	1008.15
UD52	UD52_11	UD52_80	614.1	0.282597	2e-05	0.000582	2e-06	0.28259	2e-05	7.11	0.71	908.4
UD52	UD52_12	UD52_84	597.8	0.282614	3e-05	0.000929	5e-06	0.282604	3e-05	7.22	1.06	892.99
UD52	UD52_13	UD52_86	613.2	0.282537	2.6e-05	0.000983	7e-06	0.282526	2.6e-05	4.8	0.92	1001.53
UD52	UD52_14	UD52_92	621.6	0.28269	2.9e-05	0.001003	8e-06	0.282678	2.9e-05	10.39	1.03	788.6
UD52	UD52_15	UD52_126	616.3	0.282566	3.2e-05	0.00094	9e-06	0.282555	3.2e-05	5.91	1.13	960.06
UD53	UD53_1	UD53_5	559.3	0.282441	1.9e-05	0.000187	1.3e-05	0.282439	1.9e-05	0.54	0.67	1111.8
UD53	UD53_2	UD53_6	1325.2	0.281916	3e-05	0.000783	2e-06	0.281896	3e-05	-1.59	1.06	1849.24
UD53	UD53_3	UD53_10	581.5	0.282475	2.8e-05	0.000625	1e-05	0.282468	2.8e-05	2.06	0.99	1077.62
UD53	UD53_4	UD53_11	629	0.282606	2.9e-05	0.000831	2.4e-05	0.282596	2.9e-05	7.65	1.03	901.82
UD53	UD53_5	UD53_19	636.7	0.28264	2.6e-05	0.000614	5e-06	0.282633	2.6e-05	9.11	0.92	849.76
UD53	UD53_6	UD53_22	566	0.282749	5.1e-05	0.001705	6.8e-05	0.282731	5.1e-05	11.02	1.81	719.33
UD53	UD53_7	UD53_26	615.9	0.282709	3.1e-05	0.001127	8e-06	0.282696	3.1e-05	10.89	1.1	764.52
UD53	UD53_8	UD53_32	575.6	0.282511	3.6e-05	0.001523	1.5e-05	0.282495	3.6e-05	2.86	1.27	1052.58
UD53	UD53_9	UD53_35	556.4	0.28258	3.3e-05	0.001271	4.7e-05	0.282567	3.3e-05	4.99	1.17	948.81
UD53	UD53_10	UD53_45	560.3	0.28253	2.5e-05	0.000392	1.8e-05	0.282526	2.5e-05	3.63	0.89	995.85
UD53	UD53_11	UD53_47	624.7	0.28218	3.1e-05	0.001118	7e-06	0.282167	3.1e-05	-7.65	1.1	1501.32
UD53	UD53_12	UD53_60	622.9	0.282359	3.3e-05	0.00127	2.1e-05	0.282344	3.3e-05	-1.41	1.17	1258.1
UD53	UD53_13	UD53_66	626.8	0.28262	2.9e-05	0.000852	9e-06	0.28261	2.9e-05	8.09	1.03	882.85
UD53	UD53_14	UD53_72	617.4	0.282602	3.3e-05	0.001341	1.6e-05	0.282586	3.3e-05	7.04	1.17	919.62
UD53	UD53_15	UD53_76	1033.7	0.282196	2.4e-05	0.00064	4e-06	0.282184	2.4e-05	2.05	0.85	1460.9
UD53	UD53_16	UD53_82	570.9	0.282611	2e-05	0.000325	2.2e-05	0.282608	2e-05	6.76	0.71	883.21
UD53	UD53_17	UD53_83	626.8	0.28262	2.6e-05	0.000822	1.9e-05	0.28261	2.6e-05	8.1	0.92	882.17
UD53	UD53_18	UD53_85	555.3	0.28266	5.1e-05	0.00094	0.00011	0.28265	5.1e-05	7.92	1.81	829.14
UD59	UD59_1	UD59_5	603.5	0.282593	4.3e-05	0.00105	2e-06	0.282581	4.3e-05	6.55	1.52	925.15
UD59	UD59_2	UD59_7	2013.4	0.281414	2.7e-05	3.4e-05	1e-06	0.281413	2.7e-05	-3.16	0.96	2481.19
UD59	UD59_3	UD59_10	610.7	0.282597	3.5e-05	0.000662	9e-06	0.282589	3.5e-05	7	1.24	910.3
UD59	UD59_4	UD59_21	598.4	0.282628	3.3e-05	0.000554	7e-06	0.282622	3.3e-05	7.87	1.17	865.01
UD59	UD59_5	UD59_43	609.9	0.282626	3.4e-05	0.001096	5e-06	0.282613	3.4e-05	7.83	1.2	880.13
UD59	UD59_6	UD59_45	598.1	0.282562	3.2e-05	0.000478	4e-06	0.282557	3.2e-05	5.56	1.13	954.1
UD59	UD59_7	UD59_49	603	0.282624	3.3e-05	0.001171	6e-06	0.282611	3.3e-05	7.58	1.17	884.68
UD59	UD59_8	UD59_51	609	0.2827	3.1e-05	0.000989	2e-06	0.282689	3.1e-05	10.48	1.1	774.33
UD59	UD59_9	UD59_52	632.7	0.282619	3.2e-05	0.000575	5e-06	0.282612	3.2e-05	8.29	1.13	877.9
UD59	UD59_10	UD59_64	595.4	0.282666	4.4e-05	0.001255	1.7e-05	0.282652	4.4e-05	8.88	1.56	827.61
UD59	UD59_11	UD59_68	592.5	0.282596	3.1e-05	0.000424	2e-06	0.282591	3.1e-05	6.66	1.1	906.07
UD59	UD59_12	UD59_71	618.3	0.28256	3.1e-05	0.000935	2.5e-05	0.282549	3.1e-05	5.74	1.1	968.29
UD59	UD59_13	UD59_73	599.8	0.282516	3.4e-05	0.00137	2.2e-05	0.282501	3.4e-05	3.61	1.2	1041.29
UD59	UD59_14	UD59_77	610.7	0.282601	3.2e-05	0.000561	3e-06	0.282595	3.2e-05	7.18	1.13	902.39
UD59	UD59_15	UD59_94	604.7	0.282674	2.8e-05	0.000275	2e-06	0.282671	2.8e-05	9.75	0.99	795.75
UD60	UD60_1	UD60_3	680.5	0.282738	3.3e-05	0.000989	1.6e-05	0.282725	3.3e-05	13.37	1.17	721.19
UD60	UD60_2	UD60_4	560.3	0.282571	2.7e-05	0.000711	4e-06	0.282564	2.7e-05	4.97	0.96	947.44
UD60	UD60_3	UD60_6	629.8	0.282569	3.2e-05	0.000868	5e-06	0.282559	3.2e-05	6.34	1.13	954.09
UD60	UD60_4	UD60_7	609.4	0.282597	2.8e-05	0.000444	6e-06	0.282592	2.8e-05	7.06	0.99	905.17
UD60	UD60_5	UD60_8	622.8	0.282621	4.1e-05	0.0013	2.4e-05	0.282606	4.1e-05	7.85	1.45	891.91
UD60	UD60_6	UD60_12	613.5	0.282607	2.9e-05	0.000908	2.3e-05	0.282597	2.9e-05	7.31	1.03	902.25
UD60	UD60_7	UD60_14	628	0.282589	3.2e-05	0.00102	1.5e-05	0.282577	3.2e-05	6.94	1.13	930.01
UD60	UD60_8	UD60_18	608.4	0.282655	3e-05	0.000587	3e-06	0.282648	3e-05	9.03	1.06	828.44
UD60	UD60_9	UD60_20	612.9	0.282424	4.7e-05	0.001176	7.8e-05	0.28241	4.7e-05	0.71	1.66	1164.43
UD60	UD60_10	UD60_23	609.5	0.282594	2.9e-05	0.000805	5e-06	0.282585	2.9e-05	6.81	1.03	917.85
UD60	UD60_11	UD60_29	595.9	0.28254	3.5e-05	0.000701	7e-06	0.282532	3.5e-05	4.64	1.24	990.03
UD60	UD60_12	UD60_33	626.4	0.282665	2.5e-05	0.000541	5e-06	0.282659	2.5e-05	9.8	0.89	813.67
UD60	UD60_13	UD60_64	620.7	0.282497	2.9e-05	0.0004	1.2e-05	0.282492	2.9e-05	3.78	1.03	1041.26
UD60	UD60_14	UD60_65	613.8	0.282801	3.5e-05	0.001045	1.7e-05	0.282789	3.5e-05	14.14	1.24	633.9
UD60	UD60_15	UD60_106	703.6	0.282635	6.2e-05	0.002485	2.4e-05	0.282602	6.2e-05	9.52	2.2	900.45
24VG1	X24VG1_1	24VG1_12	1356	0.282087	3.9e-05	0.001168	4.5e-05	0.282057	3.89959e-05	4.79952	1.38322	1631.99
24VG1	X24VG1_2	24VG1_15	1588	0.281854	3.4e-05	0.001811	1.6e-05	0.2818	3.39934e-05	0.902093	1.20641	1986.39
24VG1	X24VG1_3	24VG1_16	1035	0.282265	3.1e-05	0.0004815	5.8e-06	0.282256	3.0999e-05	4.62996	1.09877	1360.9
24VG1	X24VG1_4	24VG1_20	469	0.282647	3.8e-05	0.001107	1.3e-05	0.282637	3.79987e-05	5.55483	1.34518	850.995
24VG1	X24VG1_5	24VG1_32	1970	0.281631	4e-05	0.001795	2.1e-05	0.281564	3.99905e-05	1.21336	1.42047	2296.02
24VG1	X24VG1_6	24VG1_39	620	0.282594	4.2e-05	0.002289	1.6e-05	0.282567	4.1996e-05	6.42586	1.48719	954.836
24VG1	X24VG1_7	24VG1_41	1622	0.281912	4.7e-05	0.002013	2.1e-05	0.28185	4.69897e-05	3.46833	1.66777	1915.59
24VG1	X24VG1_8	24VG1_69	1703	0.281761	3.7e-05	0.002596	2e-05	0.281677	3.6989e-05	-0.834299	1.31306	2161.11
24VG1	X24VG1_9	24VG1_76	1047	0.281892	2.5e-05	0.0006372	2.6e-06	0.281879	2.49989e-05	-8.43558	0.886116	1874.85
24VG1	X24VG1_10	24VG1_81	974	0.282235	2.7e-05	0.0005623	3.7e-06	0.282225	2.6999e-05	2.16965	0.956857	1404.73
24VG1	X24VG1_11	24VG1_84	1033	0.28191	0.00011	0.000958	3.1e-05	0.281891	0.000109993	-8.32572	3.89871	1865.84
24VG1	X24VG1_12	24VG1_85	1044	0.282293	2.4e-05	0.0006418	2e-06	0.28228	2.39989e-05	5.70928	0.850666	1328.17
24VG1	X24VG1_13	24VG1_91	1052	0.282196	3.2e-05	0.0006047	2e-06	0.282184	3.19986e-05	2.47268	1.13424	1459.58
24VG1	X24VG1_14	24VG1_102	1222	0.282076	3.9e-05	0.001021	1.4e-05	0.282052	3.89967e-05	1.62081	1.38283	1640.88
24VG1	X24VG1_15	24VG1_114	511	0.282287	4.3e-05	0.0023351	9.7e-06	0.282265	4.29966e-05	-6.70837	1.52225	1397.65
24VG1	X24VG1_16	24VG1_117	1870	0.281527	4.4e-05	0.001351	2.2e-05	0.281479	4.39925e-05	-4.07612	1.56227	2411.91
24VG1	X24VG1_17	24VG1_121	578	0.282415	3.9e-05	0.00132	4.8e-05	0.282401	3.8998e-05	-0.408003	1.38089	1181.45
24VG1	X24VG1_18	24VG1_122	513	0.282404	3.1e-05	0.001943	1.3e-05	0.282385	3.09979e-05	-2.39151	1.09746	1216.84
24VG1	X24VG1_19	24VG1_123	972	0.282149	4.8e-05	0.001813	3e-05	0.282116	4.79944e-05	-1.733	1.70093	1572.8
24VG1	X24VG1_20	24VG1_127	1397	0.281896	4.8e-05	0.001923	1.3e-05	0.281845	4.79914e-05	-1.79119	1.70245	1933.44
24VG1	X24VG1_21	24VG1_128	1661	0.281856	3.4e-05	0.001737	2.5e-05	0.281801	3.39934e-05	2.61923	1.20661	1979.71
24VG1	X24VG1_22	24VG1_138	1655	0.281842	2.9e-05	0.000745	2e-05	0.281819	2.89976e-05	3.09714	1.02926	1948.05
24VG1	X24VG1_23	24VG1_140	1507	0.281963	3.8e-05	0.001438	2.3e-05	0.281922	3.79945e-05	3.41523	1.34815	1815.91
24VG1	X24VG1_24	24VG1_149	1147	0.28214	3.4e-05	0.0006274	1.8e-06	0.282126	3.39984e-05	2.56006	1.20538	1536.93
24VG1	X24VG1_25	24VG1_150	1535	0.281872	3.6e-05	0.002292	5.4e-05	0.281805	3.59915e-05	-0.0883553	1.27716	1986.61
24VG1	X24VG1_26	24VG1_154	1685	0.281779	4.6e-05	0.0018301	8.8e-06	0.281721	4.59905e-05	0.296268	1.63253	2092.11
24VG1	X24VG1_27	24VG1_156	1388	0.282103	4.1e-05	0.001402	1.2e-05	0.282066	4.09947e-05	5.84539	1.45422	1619.79
24VG1	X24VG1_28	24VG1_159	1507	0.282013	3.8e-05	0.001988	5.9e-05	0.281956	3.79924e-05	4.6331	1.34808	1772.17
24VG1	X24VG1_29	24VG1_160	1852	0.281519	2.9e-05	0.00181	1.4e-05	0.281455	2.89934e-05	-5.32588	1.02958	2452.25
24VG2A	X24VG2A_1	24VG2A_1	1463.4	0.281979	2.2e-05	0.0005425	2.2e-06	0.281964	2.19988e-05	3.91968	0.780506	1752.4
24VG2A	X24VG2A_2	24VG2A_2	1650	0.281749	3e-05	0.001458	1.5e-05	0.281703	2.99951e-05	-1.10552	1.06466	2113.09
24VG2A	X24VG2A_3	24VG2A_7	977.4	0.282009	3.9e-05	0.0005216	3.9e-06	0.281999	3.89987e-05	-5.73871	1.38214	1710.77
24VG2A	X24VG2A_4	24VG2A_8	1250.4	0.282295	3.8e-05	0.0014182	5.2e-06	0.282262	3.79955e-05	9.67329	1.34741	1352.62
24VG2A	X24VG2A_5	24VG2A_11	1455.7	0.281927	2.8e-05	0.00069	1.2e-05	0.281908	2.79981e-05	1.75974	0.99334	1829.83
24VG2A	X24VG2A_6	24VG2A_15	1493.8	0.281712	3.1e-05	0.0007274	7e-06	0.281691	3.09977e-05	-5.06379	1.09986	2123.43
24VG2A	X24VG2A_7	24VG2A_16	1600.2	0.281841	3.7e-05	0.0010685	3e-06	0.281809	3.69958e-05	1.50011	1.31299	1965.81
24VG2A	X24VG2A_8	24VG2A_48	1294	0.282211	3.5e-05	0.001642	2.6e-05	0.282171	3.4995e-05	7.43967	1.24113	1478.71
24VG2A	X24VG2A_9	24VG2A_104	1234.2	0.282098	3.5e-05	0.0010937	6.1e-06	0.282073	3.49968e-05	2.60659	1.24103	1613.65
24VG2A	X24VG2A_10	24VG2A_107	1840.1	0.28176	2.9e-05	0.0003925	6.2e-06	0.281746	2.89986e-05	4.73346	1.02973	2040.8
24VG2A	X24VG2A_11	24VG2A_110	989.4	0.282227	2.7e-05	0.0007281	8.5e-06	0.282213	2.69987e-05	2.11508	0.956879	1421.75
24VG2A	X24VG2A_12	24VG2A_113	1866.9	0.281616	4.8e-05	0.002278	7.3e-05	0.281535	4.79862e-05	-2.1496	1.70408	2346.82
24VG2A	X24VG2A_13	24VG2A_117	1076.7	0.282192	2.7e-05	0.0004699	2.2e-06	0.282182	2.69991e-05	2.97082	0.95708	1459.96
24VG2A	X24VG2A_14	24VG2A_123	457	0.282789	3.7e-05	0.002113	8.6e-05	0.282771	3.69976e-05	10.0202	1.30971	669.569
24VG2A	X24VG2A_15	24VG2A_126	978.9	0.282244	3e-05	0.000731	1.5e-05	0.282231	2.99986e-05	2.48612	1.06317	1398.53
24VG2A	X24VG2A_16	24VG2A_127	2618	0.281116	2.9e-05	0.0004151	2.2e-06	0.281095	2.89979e-05	-0.558915	1.03154	2901.04
24VG2A	X24VG2A_17	24VG2A_145	1538.8	0.281874	5.5e-05	0.003219	6.5e-05	0.28178	5.49817e-05	-0.895124	1.95105	2034.49
24VG2A	X24VG2A_18	24VG2A_149	452.7	0.282437	2.7e-05	0.0010773	9.8e-06	0.282428	2.69991e-05	-2.21864	0.955753	1143.33
24VG2B	X24VG2B_1	24VG2B_1	938.6	0.282201	5.7e-05	0.001182	1.1e-05	0.28218	5.69958e-05	-0.200462	2.0198	1474.74
24VG2B	X24VG2B_2	24VG2B_2	954	0.28224	3.4e-05	0.0012415	4.4e-06	0.282218	3.39973e-05	1.47545	1.20483	1422.85
24VG2B	X24VG2B_3	24VG2B_8	1484.7	0.281957	3.2e-05	0.0006542	5e-06	0.281939	3.19979e-05	3.50109	1.13532	1787.37
24VG2B	X24VG2B_4	24VG2B_13	1182.3	0.281998	4.1e-05	0.000976	1.3e-05	0.281976	4.09968e-05	-1.97325	1.45362	1746.09
24VG2B	X24VG2B_5	24VG2B_14	1671.7	0.281864	2.7e-05	0.001234	5.4e-06	0.281825	2.69963e-05	3.69856	0.958263	1942.67
24VG2B	X24VG2B_6	24VG2B_16	1728.7	0.281628	2.6e-05	0.000462	6.1e-06	0.281613	2.59986e-05	-2.53605	0.92297	2221.84
24VG2B	X24VG2B_7	24VG2B_20	1081.7	0.282084	4.5e-05	0.000831	1.2e-05	0.282067	4.49973e-05	-1.00811	1.59511	1621.83
24VG2B	X24VG2B_8	24VG2B_22	1046.7	0.282238	3.5e-05	0.000916	1.8e-05	0.28222	3.49978e-05	3.62742	1.24054	1413.54
24VG2B	X24VG2B_9	24VG2B_43	1020.6	0.282263	3.8e-05	0.000754	1.3e-05	0.282249	3.7998e-05	4.05588	1.34681	1373.27
24VG2B	X24VG2B_10	24VG2B_50	1043.5	0.282256	2.7e-05	0.000862	1.6e-05	0.282239	2.69984e-05	4.23341	0.956983	1386.77
24VG2B	X24VG2B_11	24VG2B_53	1017	0.282197	3e-05	0.00045518	9.7e-07	0.282188	2.99991e-05	1.84068	1.06328	1452.6
24VG2B	X24VG2B_12	24VG2B_55	612.2	0.282393	4.3e-05	0.000894	7.7e-06	0.282383	4.29984e-05	-0.285848	1.52266	1198.75
24VG2B	X24VG2B_13	24VG2B_56	1344.8	0.282051	4.4e-05	0.002021	3e-05	0.282	4.3992e-05	2.51071	1.56039	1720.11
24VG2B	X24VG2B_14	24VG2B_77	1381.3	0.282025	3.5e-05	0.0009	1.5e-05	0.282002	3.49971e-05	3.39851	1.24145	1705.66
24VG2B	X24VG2B_15	24VG2B_86	1662.8	0.281802	3.2e-05	0.0004399	3.3e-06	0.281788	3.19984e-05	2.19131	1.1358	1986.73
24VG2B	X24VG2B_16	24VG2B_87	977.9	0.282126	3.4e-05	0.0006775	5.1e-06	0.282114	3.39985e-05	-1.68285	1.20493	1558.05
24VG2B	X24VG2B_17	24VG2B_90	1021.2	0.282234	2.9e-05	0.0006938	5.9e-06	0.282221	2.89986e-05	3.08215	1.02783	1410.89
24VG2B	X24VG2B_18	24VG2B_94	1504.3	0.281976	3.4e-05	0.0011411	1.6e-06	0.281944	3.39961e-05	4.11787	1.20627	1783.93
24VG2B	X24VG2B_19	24VG2B_97	1675.8	0.281841	3.8e-05	0.001803	2.1e-05	0.281784	3.79923e-05	2.33047	1.34859	2004.12
24VG2B	X24VG2B_20	24VG2B_98	437.5	0.282523	3.9e-05	0.0011368	9.3e-06	0.282514	3.89987e-05	0.483434	1.38049	1025.13
24VG2B	X24VG2B_21	24VG2B_102	440.3	0.282478	3.8e-05	0.001427	1.8e-05	0.282466	3.79984e-05	-1.13445	1.34508	1096.31
24VG2B	X24VG2B_22	24VG2B_117	991	0.282313	3e-05	0.00088	1.1e-05	0.282297	2.99983e-05	5.09764	1.06319	1308.82
24VG2B	X24VG2B_23	24VG2B_119	1213.1	0.282011	4.9e-05	0.00114	1.7e-05	0.281985	4.89955e-05	-0.974368	1.73735	1735.66
24VG2B	X24VG2B_24	24VG2B_142	960	0.282247	4e-05	0.000844	1.3e-05	0.282232	3.99978e-05	2.10704	1.4175	1398.51
24VG2B	X24VG2B_25	24VG2B_151	1058	0.282176	2.8e-05	0.0005405	3.2e-06	0.282165	2.79989e-05	1.94096	0.992481	1484.43
24VG2B	X24VG2B_26	24VG2B_153	2630.5	0.281114	3.3e-05	0.0006701	8e-06	0.28108	3.2996e-05	-0.800711	1.17381	2922.58
24VG2B	X24VG2B_27	24VG2B_162	1096.3	0.282032	3e-05	0.0001517	1.1e-06	0.282029	2.99997e-05	-2.03529	1.06349	1663.73
24VG3	X24VG3_1	24VG3_2	447.1	0.282526	5.2e-05	0.0018348	8e-06	0.282511	5.19972e-05	0.587622	1.84065	1040.03
24VG3	X24VG3_2	24VG3_3	1742.4	0.281822	3.7e-05	0.0012817	5.4e-06	0.28178	3.69944e-05	3.69674	1.31337	2002.95
24VG3	X24VG3_3	24VG3_6	1023.7	0.28199	2.9e-05	9.8e-05	1.2e-05	0.281988	2.89998e-05	-5.10446	1.02788	1717.84
24VG3	X24VG3_4	24VG3_11	1500	0.281757	3.6e-05	0.001215	1.4e-05	0.281723	3.59956e-05	-3.821	1.27721	2088.72
24VG3	X24VG3_5	24VG3_15	1277.9	0.282091	4.1e-05	0.0010477	2.3e-06	0.282066	4.09963e-05	3.34782	1.45392	1621.36
24VG3	X24VG3_6	24VG3_25	960.7	0.282249	3.3e-05	0.000775	1.5e-05	0.282235	3.29984e-05	2.23737	1.16944	1393.26
24VG3	X24VG3_7	24VG3_26	1159.4	0.282143	3.3e-05	0.0008909	9.5e-06	0.282124	3.29977e-05	2.73514	1.16994	1543.33
24VG3	X24VG3_8	24VG3_31	1099.5	0.282223	3.4e-05	0.000632	2.4e-05	0.28221	3.39984e-05	4.45433	1.20526	1423.68
24VG3	X24VG3_9	24VG3_32	1018.3	0.282169	3e-05	0.00054	1.2e-06	0.282159	2.99989e-05	0.819284	1.06328	1493.96
24VG3	X24VG3_10	24VG3_33	1506.6	0.281949	4e-05	0.001376	1.3e-05	0.28191	3.99944e-05	2.97251	1.41912	1832.34
24VG3	X24VG3_11	24VG3_41	1575.3	0.281862	5.3e-05	0.00132	1.2e-05	0.281823	5.29926e-05	1.43379	1.88062	1949.8
24VG3	X24VG3_12	24VG3_46	939.4	0.282297	3.6e-05	0.00079	2.8e-05	0.282283	3.59982e-05	3.46431	1.27569	1327.79
24VG3	X24VG3_13	24VG3_48	1786.6	0.281427	4.7e-05	0.000993	1e-05	0.281393	4.69944e-05	-9.01489	1.66855	2525.05
24VG3	X24VG3_14	24VG3_50	1961	0.281584	3.3e-05	0.0014663	5e-06	0.281529	3.29936e-05	-0.215381	1.17192	2340.89
24VG3	X24VG3_15	24VG3_61	1136.5	0.282119	4.6e-05	0.00094	1.4e-05	0.282099	4.59967e-05	1.34709	1.63074	1578.32
24VG3	X24VG3_16	24VG3_76	995.4	0.282285	2.9e-05	0.0009865	3.5e-06	0.282267	2.89981e-05	4.13033	1.02775	1351.2
24VG3	X24VG3_17	24VG3_94	1364.1	0.282104	3.4e-05	0.0010742	3.5e-06	0.282076	3.39967e-05	5.66439	1.20591	1604.55
24VG3	X24VG3_18	24VG3_102	1600.8	0.281764	3.5e-05	0.0008986	9.2e-06	0.281737	3.49966e-05	-1.03677	1.24205	2062.09
24VG3	X24VG3_19	24VG3_107	1567.5	0.281964	2.7e-05	0.0004447	5.7e-06	0.281951	2.69987e-05	5.80554	0.958125	1768.3
24VG3	X24VG3_20	24VG3_118	1820.3	0.281632	3.9e-05	0.0007336	3.3e-06	0.281607	3.89965e-05	-0.67509	1.38469	2231.97
24VG3	X24VG3_21	24VG3_120	1791.8	0.281717	3.6e-05	0.001199	3.9e-05	0.281676	3.59948e-05	1.14779	1.27802	2142.68
24VG3	X24VG3_22	24VG3_123	1159.9	0.282262	3.4e-05	0.000903	2.2e-05	0.282242	3.39976e-05	6.95585	1.20539	1379.98
24VG3	X24VG3_23	24VG3_126	944	0.282283	3.7e-05	0.001292	1.7e-05	0.28226	3.6997e-05	2.7525	1.3111	1364.85
24VG3	X24VG3_24	24VG3_127	1638.5	0.281901	3e-05	0.0009075	2.8e-06	0.281873	2.9997e-05	4.64668	1.0647	1875.69
24VG3	X24VG3_25	24VG3_128	1154	0.282098	3.2e-05	0.0007964	4.8e-06	0.282081	3.1998e-05	1.09467	1.13448	1601.21
24VG3	X24VG3_26	24VG3_134	1063.3	0.282122	2.5e-05	0.000558	1.2e-05	0.282111	2.4999e-05	0.131103	0.886153	1558.7
24VG3	X24VG3_27	24VG3_135	1065.5	0.282118	3.2e-05	0.00131	1.3e-05	0.282092	3.1997e-05	-0.497274	1.13422	1595.06
24VG3	X24VG3_28	24VG3_155	1065.7	0.282318	2.9e-05	0.001236	3.6e-05	0.282293	2.89975e-05	6.64923	1.02789	1314.11
24VG3	X24VG3_29	24VG3_156	1703.7	0.28193	5.2e-05	0.002677	2e-05	0.281844	5.19841e-05	5.08679	1.84537	1924.4
24VG3	X24VG3_30	24VG3_161	1113.4	0.282194	3.4e-05	0.0007973	2.6e-06	0.282177	3.3998e-05	3.60893	1.20528	1469.62
24BR1	X24BR1_1	24BR1_3	604.9	0.282363	3e-05	0.000929	1.4e-05	0.282352	2.99989e-05	-1.51976	1.0623	1241.37
24BR1	X24BR1_2	24BR1_4	608.4	0.282593	3.5e-05	0.0008191	4.6e-06	0.282584	3.49988e-05	6.74475	1.23937	919.585
24BR1	X24BR1_3	24BR1_7	610	0.282578	2.9e-05	0.001173	4.1e-06	0.282565	2.89986e-05	6.10481	1.02689	949.164
24BR1	X24BR1_4	24BR1_14	619.1	0.28264	2.5e-05	0.000467	1.9e-05	0.282635	2.49995e-05	8.78553	0.885295	846.536
24BR1	X24BR1_5	24BR1_33	613.8	0.282632	3.5e-05	0.0006478	2.1e-06	0.282625	3.49991e-05	8.31253	1.23939	861.581
24BR1	X24BR1_6	24BR1_44	607.6	0.282533	3e-05	0.000721	2.1e-05	0.282525	2.99991e-05	4.64233	1.06232	1000.23
24BR1	X24BR1_7	24BR1_46	637.1	0.282662	3.6e-05	0.0005898	9.7e-06	0.282655	3.59991e-05	9.90669	1.27487	818.84
24BR1	X24BR1_8	24BR1_52	603.1	0.28255	3.5e-05	0.000646	2.8e-05	0.282543	3.49991e-05	5.17671	1.23936	974.822
24BR1	X24BR1_9	24BR1_53	633.7	0.282513	3.6e-05	0.0010218	3.8e-06	0.282501	3.59985e-05	4.37402	1.27484	1035.97
24BR1	X24BR1_10	24BR1_54	590.1	0.282642	2.9e-05	0.000647	1.5e-05	0.282635	2.89993e-05	8.15133	1.02687	847.732
24BR1	X24BR1_11	24BR1_55	602.1	0.282689	3e-05	0.000807	1.4e-05	0.28268	2.9999e-05	10.0127	1.0623	785.948
24BR1	X24BR1_12	24BR1_64	613.6	0.282562	3.4e-05	0.0011112	4.1e-06	0.282549	3.39985e-05	5.64047	1.20395	969.981
24BR1	X24BR1_13	24BR1_66	601.2	0.282626	3.5e-05	0.0006845	5.1e-06	0.282618	3.4999e-05	7.81125	1.23935	870.709
24BR1	X24BR1_14	24BR1_76	597.4	0.282599	3.1e-05	0.0005639	2.6e-06	0.282593	3.09993e-05	6.82043	1.09771	905.227
24BR1	X24BR1_15	24BR1_77	601.4	0.282689	2.7e-05	0.0005721	2.3e-06	0.282683	2.69994e-05	10.0914	0.956077	781.153
24BR1	X24BR1_16	24BR1_79	608.5	0.282624	3.4e-05	0.0005927	1.4e-06	0.282617	3.39992e-05	7.93618	1.20397	871.396
24BR1	X24BR1_17	24BR1_83	601.3	0.282571	2.7e-05	0.0004513	4.9e-06	0.282566	2.69995e-05	5.95894	0.956081	941.074
24BR1	X24BR1_18	24BR1_90	600.5	0.282614	3.1e-05	0.000405	1.1e-05	0.282609	3.09995e-05	7.48257	1.09772	880.909
24BR1	X24BR1_19	24BR1_94	587.1	0.282536	3.3e-05	0.0008642	5.5e-06	0.282526	3.29989e-05	4.24794	1.16849	999.804
24BR1	X24BR1_20	24BR1_95	612.9	0.282598	3e-05	0.0004887	1.6e-06	0.282592	2.99994e-05	7.15371	1.06234	904.841
24BR1	X24BR1_21	24BR1_96	622.6	0.282627	3.1e-05	0.0004449	4.6e-06	0.282622	3.09994e-05	8.41091	1.09777	863.938
24BR1	X24BR1_22	24BR1_100	616	0.282683	3.4e-05	0.000805	2.1e-05	0.282674	3.39989e-05	10.1021	1.20398	794.25
24BR1	X24BR1_23	24BR1_110	601.6	0.282628	3.3e-05	0.000595	1.6e-05	0.282621	3.29992e-05	7.92652	1.16854	865.924
24BR1	X24BR1_24	24BR1_112	601.5	0.282627	3.5e-05	0.001003	1.9e-05	0.282616	3.49986e-05	7.72595	1.23934	876.591
24BR1	X24BR1_25	24BR1_123	616.3	0.28257	3.7e-05	0.000971	1.1e-05	0.282559	3.69985e-05	6.03907	1.3102	955.28
24BR1	X24BR1_26	24BR1_124	600.9	0.282636	3.4e-05	0.0009835	4.3e-06	0.282625	3.39987e-05	8.03952	1.20393	863.587
24BR1	X24BR1_27	24BR1_128	613.5	0.282597	3.1e-05	0.0005153	2e-06	0.282591	3.09993e-05	7.12058	1.09775	906.842
24BR1	X24BR1_28	24BR1_131	618.2	0.282577	3.4e-05	0.0009142	3.2e-06	0.282566	3.39987e-05	6.35121	1.20398	944.127
24BR1	X24BR1_29	24BR1_133	601.7	0.282555	3.1e-05	0.0010982	2.4e-06	0.282543	3.09986e-05	5.14261	1.0977	979.425
24BR1	X24BR1_30	24BR1_139	600.4	0.282652	3.9e-05	0.002077	2e-05	0.282629	3.89968e-05	8.1593	1.38091	866.108
24BR1	X24BR1_31	24BR1_147	625	0.282618	3.3e-05	0.000885	1e-05	0.282608	3.29988e-05	7.96203	1.16858	886.406
24BR1	X24BR1_32	24BR1_148	611.1	0.282597	3.1e-05	0.0009196	1.4e-06	0.282586	3.09988e-05	6.90404	1.09773	916.438
24BR1	X24BR1_33	24BR1_153	610.8	0.282246	3.4e-05	0.0012469	5.8e-06	0.282232	3.39983e-05	-5.66476	1.20394	1414.71
24BR1	X24BR1_34	24BR1_159	621	0.282629	3.3e-05	0.0010666	9.1e-06	0.282617	3.29985e-05	8.19023	1.16856	875.261
24BR1	X24BR1_35	24BR1_160	927.6	0.282205	3.1e-05	0.000736	1.4e-06	0.282192	3.09986e-05	-0.0197377	1.09849	1452.21
24BR1	X24BR1_36	24BR1_162	638.7	0.282577	4e-05	0.001721	1.4e-05	0.282556	3.99971e-05	6.45137	1.41646	964.487
24VG4A	X24VG4A_1	24VG4A_3	643	0.282303	3.7e-05	0.0002691	1.8e-06	0.2823	3.69996e-05	-2.54132	1.31032	1301.9
24VG4A	X24VG4A_2	24VG4A_5	622.5	0.282349	3.4e-05	0.000917	2.2e-06	0.282338	3.39987e-05	-1.63124	1.20399	1260.34
24VG4A	X24VG4A_3	24VG4A_10	620.1	0.2827	4.7e-05	0.001144	1.6e-05	0.282687	4.69978e-05	10.6533	1.66431	777.494
24VG4A	X24VG4A_4	24VG4A_17	605.1	0.282631	3.5e-05	0.0008499	4.2e-06	0.282621	3.49988e-05	8.00659	1.23936	867.523
24VG4A	X24VG4A_5	24VG4A_20	619	0.282698	6.9e-05	0.00349	0.00012	0.282657	6.89901e-05	9.59426	2.44311	831.744
24VG4A	X24VG4A_6	24VG4A_21	617	0.282539	3.1e-05	0.0006457	1.3e-06	0.282532	3.09992e-05	5.08969	1.09775	989.992
24VG4A	X24VG4A_7	24VG4A_47	771.1	0.282574	2.5e-05	0.0006138	1.4e-06	0.282565	2.49992e-05	9.70478	0.885583	940.904
24VG4A	X24VG4A_8	24VG4A_50	615.5	0.282122	3e-05	0.0007245	9e-06	0.282114	2.99991e-05	-9.74204	1.06233	1565.42
24VG4A	X24VG4A_9	24VG4A_53	629.4	0.282187	3.1e-05	0.0009568	3.3e-06	0.282176	3.09988e-05	-7.23603	1.09777	1485.38
24VG4A	X24VG4A_10	24VG4A_55	590.7	0.282484	3.7e-05	0.000479	1e-06	0.282479	3.69993e-05	2.63546	1.31015	1061.23
24VG4A	X24VG4A_11	24VG4A_61	622.5	0.282653	3.6e-05	0.001016	4.3e-05	0.282641	3.59985e-05	9.09329	1.2748	840.58
24VG4A	X24VG4A_12	24VG4A_69	3052.5	0.280929	3e-05	0.0002893	7.7e-06	0.280912	2.99982e-05	3.0169	1.06821	3137.94
24VG4A	X24VG4A_13	24VG4A_75	2772.6	0.280942	3.7e-05	0.0007145	4.3e-06	0.280904	3.6995e-05	-3.77959	1.3165	3154.71
24VG4A	X24VG4A_14	24VG4A_77	863.1	0.282187	3.2e-05	0.001219	1.4e-05	0.282167	3.19978e-05	-2.34202	1.13373	1495.6
24VG4A	X24VG4A_15	24VG4A_79	730.5	0.2825	3.6e-05	0.000537	1e-05	0.282493	3.59991e-05	6.23384	1.27513	1040.83
24VG4A	X24VG4A_16	24VG4A_81	634.6	0.282665	4.1e-05	0.0008103	5e-06	0.282655	4.09986e-05	9.86543	1.45191	819.386
24VG4A	X24VG4A_17	24VG4A_87	862.4	0.282329	4.7e-05	0.001609	7.4e-05	0.282303	4.69957e-05	2.45019	1.66513	1311.66
24VG4A	X24VG4A_18	24VG4A_88	616.2	0.28262	3.5e-05	0.001224	1.8e-05	0.282606	3.49982e-05	7.70397	1.23937	891.529
24VG4A	X24VG4A_19	24VG4A_90	607.6	0.282562	3.4e-05	0.0005173	8.8e-06	0.282556	3.39993e-05	5.75147	1.20397	955.066
24VG4A	X24VG4A_20	24VG4A_96	637.9	0.282669	3.6e-05	0.002007	2e-05	0.282645	3.59969e-05	9.57139	1.27479	840.089
24VG4A	X24VG4A_21	24VG4A_99	744	0.282516	3e-05	0.0004478	5.3e-06	0.28251	2.99993e-05	7.14023	1.06264	1016.49
24VG4A	X24VG4A_22	24VG4A_108	625.5	0.282633	2.8e-05	0.0007012	2.4e-06	0.282625	2.79992e-05	8.58041	0.991534	861.394
24VG4A	X24VG4A_23	24VG4A_111	641.7	0.282158	3.5e-05	0.0006726	4.3e-06	0.28215	3.4999e-05	-7.87703	1.23946	1514.12
24VG4A	X24VG4A_24	24VG4A_118	703.1	0.28259	3.7e-05	0.001121	3.5e-05	0.282575	3.69981e-05	8.54908	1.31044	931.086
24VG4A	X24VG4A_25	24VG4A_125	614.1	0.282119	2.8e-05	0.000633	2e-05	0.282112	2.79993e-05	-9.84129	0.991512	1565.81
24VG4A	X24VG4A_26	24VG4A_129	625.5	0.282128	3.4e-05	0.0007948	4.6e-06	0.282119	3.39989e-05	-9.34203	1.204	1560.05
24VG4A	X24VG4A_27	24VG4A_130	629.7	0.282556	3.2e-05	0.000789	1.9e-05	0.282547	3.19989e-05	5.90813	1.13319	970.145
24VG4A	X24VG4A_28	24VG4A_131	635.2	0.28217	3.6e-05	0.001451	3.5e-05	0.282153	3.59978e-05	-7.92175	1.27482	1528.49
24VG4A	X24VG4A_29	24VG4A_133	1538.1	0.281978	3.3e-05	0.000831	3.9e-05	0.281954	3.29972e-05	5.24706	1.17092	1766.87
24VG4A	X24VG4A_30	24VG4A_136	604.7	0.282627	3.2e-05	0.0009926	2.9e-06	0.282616	3.19987e-05	7.79898	1.13312	876.352
24VG4A	X24VG4A_31	24VG4A_140	623.9	0.282685	3e-05	0.0010682	4.4e-06	0.282672	2.99987e-05	10.235	1.06234	796.949
24VG4A	X24VG4A_32	24VG4A_141	612.9	0.282612	3.8e-05	0.0006503	1.6e-06	0.282605	3.7999e-05	7.58369	1.34562	889.292
24VG4A	X24VG4A_33	24VG4A_142	631.4	0.282626	3.1e-05	0.0005016	1.3e-06	0.28262	3.09993e-05	8.54447	1.09779	866.584
24VG4A	X24VG4A_34	24VG4A_143	608.2	0.282702	4.1e-05	0.002508	7.3e-05	0.282673	4.09959e-05	9.91804	1.45173	803.586
24VG4A	X24VG4A_35	24VG4A_146	617.6	0.282685	3.2e-05	0.001369	1.1e-05	0.282669	3.19982e-05	9.97622	1.13313	803.306
24VG4A	X24VG4A_36	24VG4A_156	583.2	0.282654	3.1e-05	0.0006774	2.6e-06	0.282647	3.09992e-05	8.41439	1.09767	831.787
24VG4A	X24VG4A_37	24VG4A_158	841.4	0.282289	4.4e-05	0.0016928	8e-06	0.282262	4.39958e-05	0.540592	1.55877	1370.95
24VG4A	X24VG4A_38	24VG4A_162	624.4	0.282609	3e-05	0.000369	1.3e-05	0.282605	2.99995e-05	7.84439	1.06237	886.953

## Sheet: U-Pb standards data
				U-Pb Isotopic ratios								Dates (Ma)
Session	Unknown	Standard	Analysis No.	207Pb/235U	± 2s abs	206Pb/238U	± 2s abs	207Pb/206Pb	± 2s abs	rho		207Pb/235U	± 2s abs	206Pb/238U	± 2s abs	207Pb/206Pb	± 2s abs	Concordia	± 2s abs
1	UD14, UD17	GJ-1	Z_GJ1_1	0.827	0.028	0.0994	0.0034	0.06073	0.00066	0.37667		611.9	15.6	610.9	19.9	627.7	24.9	611.5	12.3
1	UD14, UD17	GJ-1	Z_GJ1_2	0.827	0.029	0.1001	0.0035	0.05998	0.00061	0.64655		611.9	16.1	615	20.5	602.6	21.6	613.1	12.7
1	UD14, UD17	GJ-1	Z_GJ1_3	0.792	0.027	0.0958	0.0033	0.06025	0.00064	0.42644		592.3	15.3	589.7	19.4	613.4	21.5	591.3	12.1
1	UD14, UD17	GJ-1	Z_GJ1_4	0.828	0.028	0.1011	0.0035	0.05944	0.00065	0.37854		612.5	15.6	620.9	20.5	580.8	25.6	615.5	12.4
1	UD14, UD17	GJ-1	Z_GJ1_5	0.813	0.028	0.0974	0.0034	0.06047	0.00067	0.44524		604.1	15.7	599.2	20	620.5	25	602.2	12.4
1	UD14, UD17	GJ-1	Z_GJ1_6	0.814	0.028	0.0985	0.0034	0.05988	0.00065	0.37746		604.7	15.7	605.6	20	599	25.3	605	12.4
1	UD14, UD17	GJ-1	Z_GJ1_7	0.836	0.029	0.1008	0.0035	0.05997	0.00065	0.40193		616.9	16	619.1	20.5	602.6	25.2	617.8	12.7
1	UD14, UD17	GJ-1	Z_GJ1_8	0.834	0.029	0.1007	0.0035	0.06013	0.00069	0.37067		615.8	16.1	618.5	20.5	606.2	25.2	616.8	12.7
1	UD14, UD17	GJ-1	Z_GJ1_9	0.833	0.029	0.0996	0.0034	0.06027	0.00064	0.43082		615.3	16.1	612.1	19.9	613.4	21.5	614	12.5
1	UD14, UD17	GJ-1	Z_GJ1_10	0.826	0.028	0.0985	0.0034	0.06048	0.00067	0.40734		611.4	15.6	605.6	20	620.5	25	609.2	12.3
1	UD14, UD17	GJ-1	Z_GJ1_11	0.821	0.028	0.0984	0.0034	0.06017	0.00067	0.38125		608.6	15.6	605	20	609.8	25.1	607.2	12.3
1	UD14, UD17	GJ-1	Z_GJ1_12	0.835	0.029	0.1001	0.0035	0.06026	0.00069	0.39522		616.4	16	615	20.5	613.4	25.1	615.9	12.7
1	UD14, UD17	GJ-1	Z_GJ1_13	0.823	0.028	0.0985	0.0034	0.06039	0.00068	0.40134		609.7	15.6	605.6	20	617	25	608.2	12.3
1	UD14, UD17	GJ-1	Z_GJ1_14	0.819	0.028	0.0983	0.0034	0.0602	0.0007	0.36889		607.5	15.6	604.4	20	609.8	25.1	606.3	12.3
1	UD14, UD17	GJ-1	Z_GJ1_15	0.815	0.028	0.0994	0.0034	0.0594	0.00065	0.35245		605.3	15.7	610.9	19.9	580.8	25.6	607.4	12.3
1	UD14, UD17	GJ-1	Z_GJ1_16	0.828	0.028	0.1001	0.0035	0.05989	0.00067	0.39126		612.5	15.6	615	20.5	599	25.3	613.4	12.4
1	UD14, UD17	GJ-1	Z_GJ1_17	0.814	0.028	0.0983	0.0034	0.06019	0.00072	0.093585		604.7	15.7	604.4	20	609.8	25.1	604.6	12.4
1	UD14, UD17	GJ-1	Z_GJ1_18	0.83	0.029	0.0993	0.0034	0.06045	0.00068	0.4392		613.6	16.1	610.3	19.9	620.5	25	612.3	12.6
1	UD14, UD17	GJ-1	Z_GJ1_19	0.817	0.028	0.0987	0.0034	0.05994	0.00068	0.43365		606.4	15.6	606.8	19.9	599	25.3	606.5	12.3
1	UD14, UD17	GJ-1	Z_GJ1_20	0.827	0.028	0.0993	0.0034	0.06043	0.0007	0.39015		611.9	15.6	610.3	19.9	617	25	611.3	12.3
1	UD14, UD17	GJ-1	Z_GJ1_21	0.833	0.029	0.1001	0.0035	0.06036	0.0007	0.37725		615.3	16.1	615	20.5	617	25	615.2	12.7
1	UD14, UD17	GJ-1	Z_GJ1_22	0.801	0.028	0.0981	0.0034	0.05946	0.00071	0.35813		597.4	15.8	603.3	20	584.5	25.5	599.6	12.4
1	UD14, UD17	GJ-1	Z_GJ1_23	0.813	0.028	0.099	0.0034	0.05977	0.00069	0.35907		604.1	15.7	608.5	19.9	595.4	25.4	605.8	12.3
1	UD14, UD17	GJ-1	Z_GJ1_24	0.812	0.028	0.0982	0.0034	0.06049	0.00072	0.106		603.6	15.7	603.9	20	620.5	25	603.7	12.4
1	UD14, UD17	GJ-1	Z_GJ1_25	0.834	0.029	0.1005	0.0035	0.06018	0.00069	0.36046		615.8	16.1	617.3	20.5	609.8	25.1	616.4	12.7
1	UD14, UD17	GJ-1	Z_GJ1_26	0.814	0.028	0.0984	0.0034	0.06011	0.0007	0.35477		604.7	15.7	605	20	606.2	25.2	604.8	12.4
1	UD14, UD17	GJ-1	Z_GJ1_27	0.837	0.029	0.1003	0.0035	0.06058	0.00074	0.33627		617.5	16	616.2	20.5	624.1	24.9	617	12.7
1	UD14, UD17	GJ-1	Z_GJ1_28	0.813	0.028	0.0973	0.0034	0.0607	0.00073	0.36855		604.1	15.7	598.6	20	627.7	24.9	602	12.4
1	UD14, UD17	GJ-1	Z_GJ1_29	0.802	0.028	0.0963	0.0033	0.06061	0.00072	0.39314		598	15.8	592.7	19.4	624.1	24.9	595.9	12.3
1	UD14, UD17	GJ-1	Z_GJ1_30	0.822	0.028	0.0998	0.0035	0.05971	0.00068	0.41675		609.2	15.6	613.2	20.5	591.7	25.4	610.7	12.4
1	UD14, UD17	GJ-1	Z_GJ1_31	0.829	0.029	0.0996	0.0034	0.06018	0.0007	0.36802		613.1	16.1	612.1	19.9	609.8	25.1	612.7	12.6
1	UD14, UD17	GJ-1	Z_GJ1_32	0.851	0.029	0.1023	0.0035	0.06016	0.00068	0.3742		625.2	15.9	627.9	20.5	609.8	25.1	626.2	12.6
1	UD14, UD17	GJ-1	Z_GJ1_33	0.833	0.029	0.0998	0.0035	0.0604	0.00073	0.31821		615.3	16.1	613.2	20.5	617	25	614.5	12.7
1	UD14, UD17	GJ-1	Z_GJ1_34	0.817	0.028	0.0975	0.0034	0.06066	0.00074	0.30462		606.4	15.6	599.7	20	627.7	24.9	603.8	12.4
1	UD14, UD17	GJ-1	Z_GJ1_35	0.796	0.028	0.0968	0.0034	0.05974	0.00074	0.328		594.6	15.8	595.6	20	591.7	25.4	595	12.4
1	UD14, UD17	GJ-1	Z_GJ1_36	0.828	0.029	0.1001	0.0035	0.06018	0.00073	0.18077		612.5	16.1	615	20.5	609.8	25.1	613.5	12.7
1	UD14, UD17	GJ-1	Z_GJ1_37	0.814	0.028	0.0982	0.0034	0.06026	0.00076	0.36399		604.7	15.7	603.9	20	613.4	28.7	604.4	12.4
1	UD14, UD17	GJ-1	Z_GJ1_38	0.841	0.029	0.1005	0.0035	0.06057	0.00072	0.37506		619.7	16	617.3	20.5	624.1	24.9	618.8	12.7
1	UD14, UD17	GJ-1	Z_GJ1_39	0.828	0.029	0.0994	0.0035	0.06027	0.00071	0.4016		612.5	16.1	610.9	20.5	613.4	25.1	611.9	12.7
1	UD14, UD17	GJ-1	Z_GJ1_40	0.81	0.028	0.0975	0.0034	0.06033	0.00075	0.25739		602.5	15.7	599.7	20	613.4	28.7	601.4	12.4
1	UD14, UD17	GJ-1	Z_GJ1_41	0.816	0.028	0.0987	0.0034	0.05985	0.00072	0.35934		605.8	15.7	606.8	19.9	599	25.3	606.2	12.3
1	UD14, UD17	GJ-1	Z_GJ1_42	0.838	0.029	0.102	0.0035	0.05961	0.0007	0.37933		618	16	626.1	20.5	588.1	25.5	621.1	12.6
1	UD14, UD17	GJ-1	Z_GJ1_43	0.81	0.028	0.0979	0.0034	0.05999	0.00074	0.32085		602.5	15.7	602.1	20	602.6	25.2	602.3	12.4
1	UD14, UD17	GJ-1	Z_GJ1_44	0.809	0.028	0.0975	0.0034	0.05987	0.00074	0.34267		601.9	15.7	599.7	20	599	25.3	601.1	12.4
1	UD14, UD17	GJ-1	Z_GJ1_45	0.832	0.029	0.0996	0.0035	0.06048	0.00072	0.41738		614.7	16.1	612.1	20.5	620.5	25	613.7	12.7
1	UD14, UD17	GJ-1	Z_GJ1_46	0.819	0.028	0.0996	0.0035	0.05962	0.00072	0.22856		607.5	15.6	612.1	20.5	588.1	25.5	609.2	12.4
1	UD14, UD17	GJ-1	Z_GJ1_47	0.827	0.029	0.0994	0.0034	0.06015	0.0007	0.36882		611.9	16.1	610.9	19.9	609.8	25.1	611.5	12.6
1	UD14, UD17	GJ-1	Z_GJ1_48	0.819	0.028	0.0986	0.0034	0.06039	0.00075	0.3379		607.5	15.6	606.2	20	617	28.6	607	12.3
1	UD14, UD17	Plešovice	Z_Plesovice_1	0.403	0.014	0.0552	0.0019	0.05336	0.0007	0.44465		343.8	10.1	346.4	11.6	344.8	29.7	344.9	7.6
1	UD14, UD17	Plešovice	Z_Plesovice_2	0.401	0.014	0.0544	0.0019	0.05372	0.00061	0.43041		342.4	10.1	341.5	11.6	357.5	25.2	342	7.7
1	UD14, UD17	Plešovice	Z_Plesovice_3	0.388	0.014	0.0526	0.0018	0.05354	0.00062	0.45836		332.9	10.2	330.5	11	349	25.4	331.8	7.5
1	UD14, UD17	Plešovice	Z_Plesovice_4	0.388	0.013	0.0533	0.0019	0.05283	0.00059	0.44017		332.9	9.5	334.7	11.6	319.2	25.8	333.6	7.4
1	UD14, UD17	Plešovice	Z_Plesovice_5	0.401	0.014	0.0544	0.0019	0.05343	0.00059	0.50739		342.4	10.1	341.5	11.6	344.8	25.4	342	7.7
1	UD14, UD17	Plešovice	Z_Plesovice_6	0.405	0.014	0.0553	0.0019	0.05292	0.00056	0.45954		345.3	10.1	347	11.6	323.5	25.8	346	7.6
1	UD14, UD17	Plešovice	Z_Plesovice_7	0.394	0.014	0.0541	0.0019	0.05264	0.00056	0.49503		337.3	10.2	339.6	11.6	310.6	26	338.3	7.7
1	UD14, UD17	Plešovice	Z_Plesovice_8	0.397	0.014	0.0534	0.0019	0.05404	0.00064	0.48451		339.5	10.2	335.4	11.6	370	25	337.7	7.7
1	UD14, UD17	Plešovice	Z_Plesovice_9	0.385	0.013	0.0523	0.0018	0.05322	0.00067	0.45898		330.7	9.5	328.6	11	336.3	29.8	329.8	7.2
1	UD14, UD17	Plešovice	Z_Plesovice_10	0.39	0.013	0.0533	0.0019	0.05277	0.00056	0.49078		334.4	9.5	334.7	11.6	319.2	25.8	334.5	7.4
1	UD14, UD17	Plešovice	Z_Plesovice_11	0.395	0.014	0.0534	0.0019	0.05328	0.00054	0.53454		338	10.2	335.4	11.6	340.6	21.2	336.9	7.7
1	UD14, UD17	Plešovice	Z_Plesovice_12	0.388	0.013	0.0526	0.0018	0.05337	0.00061	0.52307		332.9	9.5	330.5	11	344.8	25.4	331.9	7.2
1	UD14, UD17	Plešovice	Z_Plesovice_13	0.401	0.014	0.0542	0.0019	0.05346	0.00062	0.45245		342.4	10.1	340.3	11.6	349	25.4	341.5	7.7
1	UD14, UD17	Plešovice	Z_Plesovice_14	0.396	0.014	0.0543	0.0019	0.05275	0.00074	0.19582		338.7	10.2	340.9	11.6	319.2	30.1	339.7	7.7
1	UD14, UD17	Plešovice	Z_Plesovice_15	0.393	0.014	0.0528	0.0018	0.05391	0.00063	0.4577		336.6	10.2	331.7	11	365.9	25.1	334.3	7.5
1	UD14, UD17	Plešovice	Z_Plesovice_16	0.385	0.013	0.052	0.0018	0.05346	0.00062	0.46911		330.7	9.5	326.8	11	349	25.4	329	7.2
1	UD14, UD17	Plešovice	Z_Plesovice_17	0.39	0.014	0.0532	0.0019	0.05328	0.00061	0.51617		334.4	10.2	334.1	11.6	340.6	25.5	334.3	7.7
1	UD14, UD17	Plešovice	Z_Plesovice_18	0.382	0.013	0.0522	0.0018	0.05327	0.00064	0.45139		328.5	9.6	328	11	340.6	25.5	328.3	7.2
1	UD14, UD17	Plešovice	Z_Plesovice_19	0.396	0.014	0.0536	0.0019	0.05355	0.00062	0.53551		338.7	10.2	336.6	11.6	353.3	25.3	337.8	7.7
1	UD14, UD17	Plešovice	Z_Plesovice_20	0.417	0.014	0.0564	0.002	0.05323	0.00059	0.53296		353.9	10	353.7	12.2	336.3	25.6	353.8	7.8
1	UD14, UD17	Plešovice	Z_Plesovice_21	0.39	0.014	0.0533	0.0019	0.05314	0.00062	0.53948		334.4	10.2	334.7	11.6	332.1	25.6	334.5	7.7
1	UD14, UD17	Plešovice	Z_Plesovice_22	0.399	0.014	0.0545	0.0019	0.05322	0.00063	0.48893		340.9	10.2	342.1	11.6	336.3	25.6	341.4	7.7
1	UD14, UD17	Plešovice	Z_Plesovice_23	0.388	0.014	0.053	0.0019	0.05331	0.00061	0.5404		332.9	10.2	332.9	11.6	340.6	25.5	332.9	7.7
1	UD14, UD17	Plešovice	Z_Plesovice_24	0.387	0.014	0.0522	0.0018	0.05371	0.00064	0.51116		332.2	10.2	328	11	357.5	25.2	330.2	7.5
1	UD14, UD17	Plešovice	Z_Plesovice_25	0.405	0.014	0.0544	0.0019	0.054	0.00066	0.07682		345.3	10.1	341.5	11.6	370	29.2	343.6	7.6
1	UD14, UD17	Plešovice	Z_Plesovice_26	0.391	0.014	0.0536	0.0019	0.05297	0.00066	0.472		335.1	10.2	336.6	11.6	327.8	30	335.7	7.7
1	UD14, UD17	Plešovice	Z_Plesovice_27	0.398	0.014	0.0545	0.0019	0.05304	0.00064	0.52248		340.2	10.2	342.1	11.6	327.8	25.7	341	7.7
1	UD14, UD17	Plešovice	Z_Plesovice_28	0.39	0.014	0.0535	0.0019	0.05307	0.00064	0.50789		334.4	10.2	336	11.6	332.1	25.6	335.1	7.7
1	UD14, UD17	Plešovice	Z_Plesovice_29	0.394	0.014	0.0531	0.0019	0.05396	0.00061	0.52596		337.3	10.2	333.5	11.6	370	25	335.7	7.7
1	UD14, UD17	Plešovice	Z_Plesovice_30	0.4	0.014	0.0531	0.0019	0.05449	0.00063	0.4866		341.6	10.2	333.5	11.6	390.8	24.7	338.1	7.7
1	UD14, UD17	Plešovice	Z_Plesovice_31	0.409	0.014	0.0548	0.0019	0.05388	0.00061	0.54001		348.2	10.1	343.9	11.6	365.9	25.1	346.3	7.6
1	UD14, UD17	Plešovice	Z_Plesovice_32	0.42	0.015	0.057	0.002	0.05368	0.00082	0.23366		356.1	10.7	357.4	12.2	357.5	33.6	356.6	8.1
1	UD14, UD17	Plešovice	Z_Plesovice_33	0.397	0.014	0.0542	0.0019	0.05302	0.00064	0.53291		339.5	10.2	340.3	11.6	327.8	25.7	339.8	7.7
1	UD14, UD17	Plešovice	Z_Plesovice_34	0.425	0.015	0.0551	0.0019	0.05598	0.00068	0.54062		359.6	10.7	345.8	11.6	451.4	27.8	353.2	7.9
1	UD14, UD17	Plešovice	Z_Plesovice_35	0.384	0.014	0.053	0.0019	0.05254	0.00066	0.49727		330	10.3	332.9	11.6	306.2	30.4	331.3	7.7
1	UD14, UD17	Plešovice	Z_Plesovice_36	0.389	0.013	0.0528	0.0018	0.05334	0.00061	0.45679		333.6	9.5	331.7	11	340.6	25.5	332.8	7.2
1	UD14, UD17	Plešovice	Z_Plesovice_37	0.388	0.014	0.0522	0.0018	0.05393	0.00074	0.49616		332.9	10.2	328	11	365.9	29.3	330.6	7.5
1	UD14, UD17	Plešovice	Z_Plesovice_38	0.383	0.013	0.0525	0.0018	0.05264	0.00064	0.52039		329.2	9.5	329.9	11	310.6	26	329.5	7.2
1	UD14, UD17	Plešovice	Z_Plesovice_39	0.392	0.014	0.0538	0.0019	0.05297	0.00068	0.46689		335.8	10.2	337.8	11.6	327.8	30	336.7	7.7
1	UD14, UD17	Plešovice	Z_Plesovice_40	0.393	0.014	0.054	0.0019	0.05284	0.00069	0.32355		336.6	10.2	339	11.6	319.2	30.1	337.6	7.7
1	UD14, UD17	Plešovice	Z_Plesovice_41	0.398	0.014	0.0538	0.0019	0.05333	0.00067	0.51292		340.2	10.2	337.8	11.6	340.6	29.7	339.2	7.7
1	UD14, UD17	Plešovice	Z_Plesovice_42	0.401	0.014	0.0548	0.0019	0.05312	0.00068	0.30882		342.4	10.1	343.9	11.6	332.1	29.9	343	7.6
1	UD14, UD17	Plešovice	Z_Plesovice_43	0.399	0.014	0.0547	0.0019	0.05274	0.00066	0.50034		340.9	10.2	343.3	11.6	314.9	30.2	342	7.7
1	UD14, UD17	Plešovice	Z_Plesovice_44	0.405	0.014	0.055	0.0019	0.05322	0.00068	0.30245		345.3	10.1	345.1	11.6	336.3	29.8	345.2	7.6
1	UD14, UD17	Plešovice	Z_Plesovice_45	0.394	0.014	0.0532	0.0019	0.05366	0.00068	0.56069		337.3	10.2	334.1	11.6	357.5	29.4	335.9	7.7
1	UD14, UD17	Plešovice	Z_Plesovice_46	0.391	0.014	0.0533	0.0019	0.053	0.00068	0.55608		335.1	10.2	334.7	11.6	327.8	30	334.9	7.7
1	UD14, UD17	Plešovice	Z_Plesovice_47	0.409	0.014	0.0557	0.0019	0.05326	0.0007	0.27371		348.2	10.1	349.4	11.6	340.6	29.7	348.7	7.6
1	UD14, UD17	Plešovice	Z_Plesovice_48	0.411	0.014	0.0556	0.002	0.05356	0.0007	0.46943		349.6	10.1	348.8	12.2	353.3	29.5	349.3	7.8
1	UD14, UD17	91500	Z_91500_1	1.98	0.071	0.1914	0.0067	0.0756	0.0011	0.3512		1108.7	24.2	1129	36.3	1083.6	29.2	1114.9	20.1
1	UD14, UD17	91500	Z_91500_2	1.842	0.066	0.1803	0.0063	0.0745	0.0011	0.30762		1060.6	23.6	1068.6	34.4	1054.1	29.7	1063.1	19.5
1	UD14, UD17	91500	Z_91500_3	1.899	0.068	0.185	0.0065	0.075	0.0012	0.27001		1080.7	23.8	1094.2	35.4	1067.6	32.2	1084.9	19.8
1	UD14, UD17	91500	Z_91500_4	1.911	0.067	0.1856	0.0065	0.0751	0.0011	0.31661		1084.9	23.4	1097.5	35.3	1070.3	29.4	1088.7	19.5
1	UD14, UD17	91500	Z_91500_5	1.876	0.067	0.1815	0.0063	0.0754	0.0011	0.24155		1072.7	23.7	1075.2	34.4	1078.3	29.3	1073.5	19.6
1	UD14, UD17	91500	Z_91500_6	1.862	0.066	0.1787	0.0063	0.0753	0.0011	0.30363		1067.7	23.4	1059.9	34.5	1075.6	29.3	1065.2	19.5
1	UD14, UD17	91500	Z_91500_7	1.935	0.069	0.1846	0.0064	0.0758	0.0011	0.30201		1093.3	23.9	1092.1	34.8	1088.9	29.1	1092.9	19.8
1	UD14, UD17	91500	Z_91500_8	1.912	0.068	0.1829	0.0064	0.0757	0.0011	0.28819		1085.3	23.7	1082.8	34.9	1086.2	29.1	1084.5	19.7
1	UD14, UD17	91500	Z_91500_9	1.874	0.067	0.1807	0.0063	0.075	0.0011	0.33403		1071.9	23.7	1070.8	34.4	1067.6	29.5	1071.6	19.6
1	UD14, UD17	91500	Z_91500_10	1.862	0.066	0.1807	0.0063	0.0746	0.0011	0.30169		1067.7	23.4	1070.8	34.4	1056.8	29.7	1068.7	19.4
1	UD14, UD17	91500	Z_91500_11	1.935	0.069	0.1862	0.0065	0.075	0.0011	0.29418		1093.3	23.9	1100.8	35.3	1067.6	29.5	1095.6	19.8
1	UD14, UD17	91500	Z_91500_12	1.884	0.067	0.1826	0.0064	0.0748	0.0011	0.29466		1075.5	23.6	1081.2	34.9	1062.2	29.6	1077.2	19.6
1	UD14, UD17	91500	Z_91500_13	1.911	0.068	0.1826	0.0064	0.0758	0.0012	0.22603		1084.9	23.7	1081.2	34.9	1088.9	31.7	1083.7	19.7
1	UD14, UD17	91500	Z_91500_14	1.938	0.069	0.1854	0.0065	0.0756	0.0011	0.31607		1094.3	23.8	1096.4	35.3	1083.6	29.2	1095	19.9
1	UD14, UD17	91500	Z_91500_15	1.86	0.067	0.178	0.0062	0.0758	0.0012	0.30675		1067	23.8	1056	33.9	1088.9	31.7	1063.4	19.6
1	UD14, UD17	91500	Z_91500_16	1.885	0.067	0.1803	0.0063	0.0761	0.0012	0.24591		1075.8	23.6	1068.6	34.4	1096.8	31.6	1073.5	19.6
1	UD14, UD17	91500	Z_91500_17	1.953	0.07	0.187	0.0066	0.0759	0.0012	0.22696		1099.5	24.1	1105.1	35.8	1091.5	31.7	1101.2	20
1	UD14, UD17	91500	Z_91500_18	1.883	0.067	0.1813	0.0063	0.0752	0.0012	0.25267		1075.1	23.6	1074.1	34.4	1072.9	32.1	1074.8	19.6
1	UD14, UD17	91500	Z_91500_19	1.857	0.068	0.1789	0.0063	0.0758	0.0013	0.0039928		1065.9	24.2	1061	34.4	1088.9	34.4	1064.3	19.9
1	UD14, UD17	91500	Z_91500_20	1.932	0.069	0.1892	0.0066	0.0743	0.0012	0.28083		1092.2	23.9	1117	35.8	1048.7	32.6	1099.8	19.8
1	UD14, UD17	91500	Z_91500_21	1.878	0.067	0.1811	0.0064	0.0755	0.0012	0.33616		1073.4	23.6	1073	34.9	1080.9	31.9	1073.2	19.7
1	UD14, UD17	91500	Z_91500_22	1.843	0.066	0.1812	0.0064	0.0742	0.0012	0.31457		1060.9	23.6	1073.5	34.9	1046	32.6	1064.8	19.6
1	UD14, UD17	91500	Z_91500_23	1.924	0.068	0.1868	0.0065	0.0749	0.0012	0.18349		1089.5	23.6	1104	35.3	1064.9	32.2	1093.9	19.6
1	UD14, UD17	91500	Z_91500_24	1.867	0.067	0.1817	0.0064	0.0751	0.0012	0.1998		1069.5	23.7	1076.3	34.9	1070.3	32.1	1071.6	19.7
1	UD14, UD17	91500	Z_91500_25	1.907	0.068	0.1865	0.0065	0.0744	0.0011	0.27152		1083.5	23.8	1102.4	35.3	1051.4	29.8	1089.3	19.7
1	UD14, UD17	91500	Z_91500_26	1.877	0.068	0.184	0.0065	0.0743	0.0012	0.24946		1073	24	1088.8	35.4	1048.7	32.6	1077.9	19.9
1	UD14, UD17	91500	Z_91500_27	1.907	0.069	0.1862	0.0066	0.0752	0.0012	0.26478		1083.5	24.1	1100.8	35.9	1072.9	32.1	1088.8	20
1	UD14, UD17	91500	Z_91500_28	1.922	0.069	0.1853	0.0065	0.0757	0.0012	0.24632		1088.8	24	1095.9	35.4	1086.2	31.8	1091	19.9
1	UD14, UD17	91500	Z_91500_29	1.945	0.069	0.1872	0.0066	0.0754	0.0011	0.27913		1096.7	23.8	1106.2	35.8	1078.3	29.3	1099.6	19.9
1	UD14, UD17	91500	Z_91500_30	1.926	0.069	0.1866	0.0066	0.0753	0.0012	0.29875		1090.2	23.9	1102.9	35.9	1075.6	32	1094	19.9
1	UD14, UD17	91500	Z_91500_31	1.887	0.068	0.1826	0.0064	0.0754	0.0013	0.25075		1076.5	23.9	1081.2	34.9	1078.3	34.6	1078	19.8
1	UD14, UD17	91500	Z_91500_32	1.885	0.068	0.1809	0.0064	0.0754	0.0012	0.23366		1075.8	23.9	1071.9	34.9	1078.3	31.9	1074.6	19.9
1	UD14, UD17	91500	Z_91500_33	1.909	0.068	0.1839	0.0065	0.0754	0.0012	0.20075		1084.2	23.7	1088.2	35.4	1078.3	31.9	1085.5	19.8
1	UD14, UD17	91500	Z_91500_34	1.889	0.068	0.1817	0.0064	0.0753	0.0012	0.24794		1077.2	23.9	1076.3	34.9	1075.6	32	1076.9	19.8
1	UD14, UD17	91500	Z_91500_35	1.838	0.066	0.1778	0.0063	0.0756	0.0013	0.23479		1059.1	23.6	1054.9	34.5	1083.6	34.5	1057.8	19.6
1	UD14, UD17	91500	Z_91500_36	1.924	0.069	0.1865	0.0066	0.075	0.0012	0.24355		1089.5	24	1102.4	35.9	1067.6	32.2	1093.4	20
1	UD14, UD17	91500	Z_91500_37	1.875	0.068	0.1791	0.0063	0.0759	0.0012	0.30908		1072.3	24	1062.1	34.4	1091.5	31.7	1068.9	19.8
1	UD14, UD17	91500	Z_91500_38	1.922	0.069	0.1855	0.0065	0.0752	0.0012	0.255		1088.8	24	1097	35.3	1072.9	32.1	1091.3	19.9
1	UD14, UD17	91500	Z_91500_39	1.921	0.069	0.186	0.0065	0.0749	0.0012	0.299		1088.4	24	1099.7	35.3	1064.9	32.2	1091.9	19.9
1	UD14, UD17	91500	Z_91500_40	1.876	0.068	0.18	0.0063	0.0761	0.0013	0.19731		1072.7	24	1067	34.4	1096.8	34.2	1070.8	19.8
1	UD14, UD17	91500	Z_91500_41	1.927	0.07	0.1872	0.0066	0.0745	0.0013	0.24265		1090.5	24.3	1106.2	35.8	1054.1	35.1	1095.4	20.1
1	UD14, UD17	91500	Z_91500_42	1.888	0.068	0.1832	0.0065	0.0753	0.0013	0.23194		1076.9	23.9	1084.4	35.4	1075.6	34.7	1079.2	19.9
1	UD14, UD17	91500	Z_91500_43	1.947	0.07	0.1882	0.0066	0.0751	0.0012	0.26619		1097.4	24.1	1111.6	35.8	1070.3	32.1	1101.8	20
1	UD14, UD17	91500	Z_91500_44	1.967	0.071	0.1884	0.0066	0.0763	0.0012	0.27206		1104.3	24.3	1112.7	35.8	1102.1	31.5	1106.9	20.2
1	UD14, UD17	91500	Z_91500_45	1.913	0.069	0.1837	0.0065	0.0758	0.0012	0.3045		1085.6	24.1	1087.2	35.4	1088.9	31.7	1086.1	20
1	UD14, UD17	91500	Z_91500_46	1.888	0.069	0.1817	0.0064	0.0756	0.0013	0.27266		1076.9	24.3	1076.3	34.9	1083.6	34.5	1076.7	20
1	UD14, UD17	91500	Z_91500_47	1.936	0.07	0.1868	0.0066	0.0753	0.0012	0.28682		1093.6	24.2	1104	35.8	1075.6	32	1096.8	20.1
1	UD14, UD17	91500	Z_91500_48	1.958	0.071	0.1871	0.0066	0.0763	0.0013	0.22158		1101.2	24.4	1105.6	35.8	1102.1	34.1	1102.6	20.2
2	UD52, UD54	91500	Z_91500_1	1.86182	0.046156	0.177949	0.002387	0.075198	0.001945	0.144979		1067.6	16.4	1055.5	13.1	1072.9	50.7	1060.2	10.3
2	UD52, UD54	91500	Z_91500_2	1.81838	0.042972	0.176764	0.002191	0.074871	0.001946	0.142686		1052.1	15.5	1049.5	12.1	1064.9	51	1050.5	9.5
2	UD52, UD54	91500	Z_91500_3	1.8674	0.043524	0.182889	0.002259	0.074596	0.001765	0.292449		1069.6	15.4	1082.8	12.5	1056.8	48.6	1077.5	9.7
2	UD52, UD54	91500	Z_91500_4	1.90155	0.0492	0.179295	0.002711	0.07597	0.002051	0.174955		1081.6	17.2	1063.1	14.8	1094.2	55.3	1070.9	11.3
2	UD52, UD54	91500	Z_91500_5	1.82244	0.043312	0.179733	0.00245	0.073753	0.00191	0.210516		1053.5	15.6	1065.3	13.7	1035.1	52	1060.2	10.2
2	UD52, UD54	91500	Z_91500_6	1.82737	0.040034	0.17839	0.002237	0.075063	0.001744	0.207198		1055.3	14.4	1058.2	12	1070.3	45.5	1057	9.2
2	UD52, UD54	91500	Z_91500_7	1.86768	0.043264	0.17983	0.002479	0.074999	0.001787	0.259399		1069.7	15.3	1065.9	13.7	1067.6	48.2	1067.6	10.2
2	UD52, UD54	91500	Z_91500_8	1.8418	0.046584	0.177928	0.002392	0.075294	0.00205	0.152205		1060.5	16.7	1055.5	13.1	1075.6	56	1057.4	10.3
2	UD52, UD54	91500	Z_91500_9	1.84256	0.042768	0.179782	0.0022	0.074549	0.001624	0.319864		1060.8	15.3	1065.9	12	1054.1	43.3	1063.9	9.4
2	UD52, UD54	91500	Z_91500_10	1.8523	0.047046	0.179061	0.002466	0.075415	0.002182	0.122494		1064.2	16.7	1062.1	13.7	1078.3	58.6	1062.9	10.6
2	UD52, UD54	91500	Z_91500_11	1.82939	0.047024	0.178655	0.002441	0.07431	0.002043	0.159926		1056.1	16.9	1059.9	13.1	1048.7	54.3	1058.4	10.4
2	UD52, UD54	91500	Z_91500_12	1.86794	0.051313	0.179776	0.002498	0.075055	0.002063	0.26007		1069.8	18.2	1065.9	13.7	1070.3	56.2	1067.3	10.9
2	UD52, UD54	91500	Z_91500_13	1.81572	0.047245	0.179689	0.002665	0.074342	0.002024	0.178482		1051.1	17	1065.3	14.8	1048.7	54.3	1059.2	11.1
2	UD52, UD54	91500	Z_91500_14	1.84122	0.049544	0.17899	0.002628	0.074688	0.002085	0.208873		1060.3	17.7	1061.5	14.2	1059.5	56.6	1061	11.1
2	UD52, UD54	91500	Z_91500_15	1.89014	0.052171	0.178832	0.00261	0.075691	0.002182	0.207526		1077.6	18.3	1060.4	14.2	1086.2	58.3	1066.8	11.3
2	UD52, UD54	91500	Z_91500_16	1.87444	0.045991	0.18024	0.002532	0.075035	0.001881	0.299367		1072.1	16.2	1068.1	13.7	1067.6	50.9	1069.7	10.5
2	UD52, UD54	91500	Z_91500_17	1.82892	0.050389	0.178478	0.002901	0.074201	0.002215	0.136393		1055.9	18.1	1058.8	15.9	1046	59.8	1057.5	11.9
2	UD52, UD54	91500	Z_91500_18	1.84473	0.049619	0.178846	0.002452	0.075284	0.002188	0.144136		1061.5	17.7	1060.4	13.7	1075.6	58.7	1060.8	10.8
2	UD52, UD54	91500	Z_91500_19	1.8631	0.048239	0.178843	0.002525	0.075689	0.002119	0.102502		1068.1	17.1	1060.4	13.7	1086.2	55.6	1063.4	10.7
2	UD52, UD54	91500	Z_91500_20	1.80626	0.046701	0.177607	0.002614	0.073647	0.001861	0.269257		1047.7	16.9	1053.8	14.2	1029.6	52.2	1051.3	10.9
2	UD52, UD54	91500	Z_91500_21	1.88043	0.04676	0.181036	0.002526	0.075617	0.002025	0.141794		1074.2	16.5	1072.4	13.6	1083.6	53.1	1073.2	10.5
2	UD52, UD54	91500	Z_91500_22	1.85061	0.055079	0.180249	0.002592	0.073835	0.0023	0.057179		1063.6	19.6	1068.1	14.2	1035.1	63	1066.5	11.5
2	UD52, UD54	91500	Z_91500_23	1.87891	0.053705	0.177306	0.002718	0.077032	0.002391	0.092567		1073.7	18.9	1052.2	14.8	1120.3	62.2	1060.2	11.7
2	UD52, UD54	91500	Z_91500_24	1.8624	0.047604	0.179658	0.002542	0.075181	0.002125	0.093515		1067.8	16.9	1065.3	13.7	1072.9	56.1	1066.3	10.6
2	UD52, UD54	91500	Z_91500_25	1.82743	0.055488	0.177585	0.00273	0.074725	0.002313	0.16617		1055.3	19.9	1053.8	14.8	1059.5	62	1054.4	11.9
2	UD52, UD54	91500	Z_91500_26	1.84393	0.05925	0.179666	0.002701	0.074775	0.002528	0.079378		1061.3	21.2	1065.3	14.8	1062.2	67.2	1064	12.1
2	UD52, UD54	91500	Z_91500_27	1.85548	0.052196	0.180353	0.002538	0.074533	0.002059	0.197136		1065.4	18.6	1069.2	13.7	1054.1	56.8	1067.8	11
2	UD52, UD54	91500	Z_91500_29	1.81204	0.049177	0.178986	0.002449	0.073858	0.002162	0.165714		1049.8	17.8	1061.5	13.1	1037.8	60.1	1057.3	10.5
2	UD52, UD54	91500	Z_91500_30	1.87353	0.05188	0.18049	0.002809	0.075587	0.002098	0.190314		1071.8	18.3	1069.7	15.3	1083.6	55.7	1070.5	11.8
2	UD52, UD54	91500	Z_91500_32	1.86675	0.049771	0.178891	0.002745	0.075404	0.002121	0.254026		1069.4	17.6	1061	14.8	1078.3	55.9	1064.4	11.4
2	UD52, UD54	91500	Z_91500_33	1.88992	0.05895	0.180354	0.002878	0.075317	0.002308	0.29676		1077.5	20.7	1069.2	15.8	1075.6	61.3	1072.2	12.6
2	UD52, UD54	91500	Z_91500_34	1.85213	0.052468	0.178863	0.002747	0.075591	0.002356	0.128107		1064.2	18.7	1061	14.8	1083.6	63.7	1062.2	11.6
2	UD52, UD54	91500	Z_91500_35	1.80715	0.050596	0.178828	0.00248	0.073269	0.002095	0.199685		1048	18.3	1060.4	13.7	1021.3	58	1055.9	10.9
2	UD52, UD54	91500	Z_91500_36	1.84489	0.05563	0.178407	0.002536	0.075368	0.002344	0.17167		1061.6	19.8	1058.2	13.7	1078.3	61.2	1059.3	11.3
2	UD52, UD54	GJ-1	GJ-1 1	0.808908	0.014543	0.098058	0.000895	0.058018	0.001077	0.080753		601.8	8.1	603.3	5.3	528.8	41.6	602.8	4.4
2	UD52, UD54	GJ-1	GJ-1 2	0.81679	0.013363	0.09869	0.000908	0.058721	0.000964	0.283436		606.3	7.5	606.8	5.3	555	37.2	606.6	4.3
2	UD52, UD54	GJ-1	GJ-1_3	0.800595	0.015585	0.096553	0.001094	0.058394	0.001122	0.286167		597.2	8.8	594.5	6.5	543.8	41.2	595.4	5.2
2	UD52, UD54	GJ-1	GJ-1_4	0.806908	0.015331	0.097866	0.001012	0.058394	0.001107	0.239431		600.7	8.6	602.1	5.9	543.8	41.2	601.7	4.8
2	UD52, UD54	GJ-1	GJ-1_5	0.816465	0.015737	0.097636	0.001031	0.05964	0.001149	0.318064		606.1	8.8	600.3	5.9	588.1	40	602.1	4.9
2	UD52, UD54	GJ-1	GJ-1_6	0.807761	0.01612	0.09807	0.001114	0.058885	0.001139	0.315177		601.2	9	603.3	6.5	562.4	40.7	602.6	5.3
2	UD52, UD54	GJ-1	GJ-1_7	0.805908	0.014393	0.097355	0.001121	0.059959	0.001163	0.216225		600.2	8.1	599.2	6.5	602.6	43.3	599.5	5.1
2	UD52, UD54	GJ-1	GJ-1_8	0.815045	0.016326	0.098296	0.001131	0.059722	0.001187	0.24999		605.3	9.1	604.4	6.5	591.7	43.6	604.7	5.3
2	UD52, UD54	GJ-1	GJ-1_9	0.814457	0.015562	0.09788	0.001041	0.062937	0.00127	0.236173		605	8.7	602.1	5.9	703.9	44	603	4.9
2	UD52, UD54	GJ-1	GJ-1_10	0.799505	0.014693	0.097899	0.001184	0.060751	0.001134	0.270694		596.5	8.3	602.1	7	631.2	39	599.8	5.4
2	UD52, UD54	GJ-1	GJ-1_11	0.816654	0.026448	0.098265	0.001686	0.059082	0.001828	0.292144		606.2	14.8	604.4	10	569.8	66.3	605	8.3
2	UD52, UD54	GJ-1	GJ-1_12	0.824177	0.023059	0.09729	0.00147	0.06007	0.001791	0.072931		610.4	12.9	598.6	8.8	606.2	64.8	602.3	7.3
2	UD52, UD54	GJ-1	GJ-1_13	0.810529	0.017278	0.098162	0.001284	0.060327	0.001465	0.064935		602.7	9.7	603.9	7.6	613.4	53.7	603.4	6
2	UD52, UD54	GJ-1	GJ-1_14	0.807084	0.020298	0.098215	0.001246	0.059956	0.001472	0.300863		600.8	11.4	603.9	7	602.6	54.1	603	6
2	UD52, UD54	GJ-1	GJ-1_15	0.805244	0.014948	0.097252	0.001059	0.059645	0.001183	0.301757		599.8	8.4	598.6	6.5	588.1	43.7	599	5.1
2	UD52, UD54	GJ-1	GJ-1_16	0.818239	0.016143	0.097588	0.001103	0.060712	0.001235	0.232928		607	9	600.3	6.5	627.7	42.6	602.6	5.3
2	UD52, UD54	GJ-1	GJ-1 17	0.808366	0.017483	0.096681	0.001023	0.060681	0.001372	0.123476		601.6	9.8	595	5.9	627.7	49.7	596.7	5.1
2	UD52, UD54	GJ-1	GJ-1 18	0.80868	0.019415	0.098318	0.001341	0.0599	0.001386	0.336568		601.7	10.9	604.4	7.6	599	50.6	603.5	6.2
2	UD52, UD54	GJ-1	GJ-19	0.820081	0.017895	0.097783	0.00125	0.061148	0.001479	0.098652		608.1	10	601.5	7.6	641.8	52.8	603.9	6.1
2	UD52, UD54	GJ-1	GJ-20	0.81293	0.01695	0.098172	0.001162	0.060106	0.001287	0.200132		604.1	9.5	603.9	7	606.2	46.8	603.9	5.7
2	UD52, UD54	GJ-1	GJ-21	0.792709	0.015944	0.09728	0.001031	0.05854	0.001237	0.187291		592.7	9	598.6	5.9	547.6	44.8	596.8	4.9
2	UD52, UD54	GJ-1	GJ-22	0.810667	0.017374	0.097044	0.000957	0.059818	0.001262	0.2464		602.8	9.8	596.8	5.9	595.4	47.1	598.4	5
2	UD52, UD54	GJ-1	GJ-1_23	0.811185	0.022005	0.096877	0.001415	0.059515	0.001588	0.335075		603.1	12.3	596.2	8.2	584.5	58.4	598.3	6.9
2	UD52, UD54	GJ-1	GJ-1_24	0.807591	0.01919	0.0972	0.001103	0.060196	0.001505	0.244995		601.1	10.8	598	6.5	609.8	53.9	598.8	5.6
2	UD52, UD54	Plešovice	PL 1	0.393452	0.009034	0.053743	0.000974	0.050778	0.001149	0.393603		336.9	6.6	337.2	6.1	230.7	50	337.1	4.5
2	UD52, UD54	Plešovice	PL 2	0.392498	0.009753	0.05407	0.000763	0.051087	0.001267	0.272543		336.2	7.1	339.6	4.9	244.3	58.6	338.5	4
2	UD52, UD54	Plešovice	PL 3	0.400529	0.008047	0.053559	0.000607	0.052006	0.001067	0.259843		342	5.8	336.6	3.7	284.4	48.4	338.1	3.1
2	UD52, UD54	Plešovice	PL_4	0.396225	0.007591	0.05352	0.000552	0.051535	0.00101	0.215869		338.9	5.5	336	3.7	262.2	44.6	336.9	3.1
2	UD52, UD54	Plešovice	PL_5	0.394563	0.007602	0.053909	0.000543	0.051746	0.001028	0.222077		337.7	5.5	338.4	3.1	271.1	44.3	338.3	2.7
2	UD52, UD54	Plešovice	PL_6	0.405422	0.010813	0.053722	0.000701	0.053116	0.001442	0.234498		345.6	7.8	337.2	4.3	332.1	59.8	339.1	3.8
2	UD52, UD54	Plešovice	PL_7	0.39317	0.00793	0.053623	0.000562	0.052806	0.001095	0.171216		336.7	5.8	336.6	3.7	319.2	47.4	336.6	3.1
2	UD52, UD54	Plešovice	PL_8	0.400341	0.008395	0.053953	0.00054	0.053691	0.001179	0.180605		341.9	6.1	339	3.1	357.5	50.4	339.6	2.7
2	UD52, UD54	Plešovice	PL_9	0.395856	0.010258	0.054058	0.000762	0.056131	0.001405	0.283891		338.7	7.5	339.6	4.9	455.3	55.4	339.4	4.1
2	UD52, UD54	Plešovice	PL_10	0.394462	0.009855	0.053797	0.000646	0.055804	0.001424	0.204135		337.7	7.2	337.8	3.7	443.4	55.8	337.8	3.3
2	UD52, UD54	Plešovice	PL_11	0.392793	0.00768	0.053411	0.000531	0.051676	0.00114	0.065353		336.4	5.6	335.4	3.1	271.1	48.8	335.6	2.7
2	UD52, UD54	Plešovice	PL_12	0.398859	0.007718	0.053505	0.000515	0.05238	0.001059	0.168416		340.9	5.6	336	3.1	301.9	47.9	337.1	2.7
2	UD52, UD54	Plešovice	PL_13	0.397563	0.008199	0.053848	0.00052	0.053569	0.001177	0.084		339.9	6	337.8	3.1	353.3	50.6	338.2	2.7
2	UD52, UD54	Plešovice	PL_14	0.392733	0.014257	0.054023	0.000998	0.053848	0.001854	0.304521		336.3	10.4	339	6.1	361.7	79.7	338.3	5.3
2	UD52, UD54	Plešovice	PL_15	0.390493	0.008586	0.05367	0.000575	0.052381	0.001183	0.232097		334.7	6.3	337.2	3.7	301.9	52.2	336.6	3.2
2	UD52, UD54	Plešovice	PL_16	0.394816	0.009536	0.05391	0.000746	0.053335	0.001394	0.185433		337.9	6.9	338.4	4.3	340.6	59.5	338.3	3.6
2	UD52, UD54	Plešovice	PL_17	0.39078	0.008746	0.053706	0.000557	0.052685	0.001145	0.221609		335	6.4	337.2	3.7	314.9	47.5	336.6	3.2
2	UD52, UD54	Plešovice	PL_18	0.394744	0.00997	0.054259	0.000705	0.052977	0.001322	0.261575		337.8	7.3	340.9	4.3	327.8	55.7	340.1	3.7
2	UD52, UD54	Plešovice	PL_19	0.398095	0.009526	0.053745	0.000855	0.054094	0.001406	0.203688		340.3	6.9	337.2	5.5	374.2	58.2	338.4	4.3
2	UD52, UD54	Plešovice	PL_20	0.401826	0.010112	0.053394	0.000605	0.05493	0.001496	0.105974		343	7.3	335.4	3.7	407.1	61.1	336.9	3.3
2	UD52, UD54	Plešovice	PL_21	0.392583	0.009307	0.053857	0.00068	0.052175	0.001189	0.295798		336.3	6.8	338.4	4.3	293.2	52.5	337.8	3.6
2	UD52, UD54	Plešovice	PL_22	0.39314	0.008871	0.053844	0.000597	0.052444	0.001227	0.198712		336.6	6.5	337.8	3.7	301.9	52.2	337.5	3.2
2	UD52, UD54	Plešovice	PL_23	0.391756	0.009102	0.053871	0.000664	0.052478	0.001241	0.171756		335.7	6.6	338.4	4.3	306.2	52.1	337.6	3.6
2	UD52, UD54	Plešovice	PL_24	0.394967	0.008579	0.053859	0.000607	0.052841	0.001175	0.200199		338	6.3	338.4	3.7	319.2	51.7	338.3	3.2
3	UD53, UD62, UD63	Plešovice	PL 1	0.398691	0.029844	0.053823	0.001105	0.053572	0.001514	0.383907		340.7	21.6	337.8	6.7	353.3	63.2	338.1	6.4
3	UD53, UD62, UD63	Plešovice	PL 2	0.399527	0.030438	0.054094	0.001268	0.053542	0.001689	0.387159		341.3	22.1	339.6	8	349	71.8	339.8	7.5
3	UD53, UD62, UD63	Plešovice	PL 3	0.398382	0.03032	0.053999	0.001127	0.053405	0.001757	0.437111		340.5	22	339	6.7	344.8	76.3	339.2	6.4
3	UD53, UD62, UD63	Plešovice	PL_4	0.403515	0.031812	0.054136	0.00123	0.05403	0.002018	0.231143		344.2	23	339.6	7.3	370	83.4	340.1	7
3	UD53, UD62, UD63	Plešovice	PL_5	0.393436	0.029868	0.054015	0.001086	0.052564	0.001572	0.20826		336.9	21.8	339	6.7	310.6	69.2	338.8	6.4
3	UD53, UD62, UD63	Plešovice	PL_6	0.392053	0.029405	0.053593	0.00106	0.052959	0.001512	0.337035		335.9	21.4	336.6	6.7	327.8	64.2	336.5	6.4
3	UD53, UD62, UD63	Plešovice	PL_7	0.39688	0.030287	0.053341	0.001165	0.053936	0.00168	0.270294		339.4	22	334.7	7.3	365.9	71.1	335.2	7
3	UD53, UD62, UD63	Plešovice	PL_8	0.389649	0.029308	0.053005	0.001062	0.053388	0.001597	0.423913		334.1	21.4	332.9	6.7	344.8	67.8	333	6.4
3	UD53, UD62, UD63	Plešovice	PL_9	0.399861	0.032982	0.053981	0.001635	0.053695	0.002377	0.321841		341.6	23.9	339	9.8	357.5	100.9	339.4	9.1
3	UD53, UD62, UD63	Plešovice	PL_10	0.396259	0.030174	0.053846	0.001115	0.053249	0.001618	0.246721		339	22	337.8	6.7	336.3	68.1	337.9	6.4
3	UD53, UD62, UD63	Plešovice	PL_11	0.390257	0.03081	0.053738	0.001189	0.052495	0.002029	0.360195		334.6	22.5	337.2	7.3	306.2	86.8	336.9	7
3	UD53, UD62, UD63	Plešovice	PL_12	0.39655	0.030909	0.053887	0.001227	0.0531	0.001954	0.387983		339.2	22.5	338.4	7.3	332.1	85.4	338.5	7
3	UD53, UD62, UD63	Plešovice	PL_13	0.391708	0.032005	0.053986	0.001334	0.05175	0.00211	0.213197		335.6	23.3	339	8	275.6	92.9	338.7	7.5
3	UD53, UD62, UD63	Plešovice	PL_14	0.403516	0.032245	0.053775	0.001401	0.054478	0.002291	0.441599		344.2	23.3	337.8	8.6	390.8	94.7	338.6	8
3	UD53, UD62, UD63	Plešovice	PL_15	0.397501	0.030158	0.053327	0.001083	0.054099	0.00168	0.319457		339.8	21.9	334.7	6.7	374.2	70.7	335.2	6.4
3	UD53, UD62, UD63	Plešovice	PL_16	0.396087	0.031055	0.053083	0.001145	0.054126	0.001986	0.262401		338.8	22.6	333.5	6.7	374.2	83.2	334	6.5
3	UD53, UD62, UD63	Plešovice	PL_17	0.389569	0.030489	0.053487	0.001153	0.052888	0.001995	0.381298		334.1	22.3	336	7.3	323.5	85.9	335.8	7
3	UD53, UD62, UD63	Plešovice	PL_18	0.403551	0.032486	0.053556	0.001307	0.054454	0.002401	0.412288		344.3	23.5	336.6	8	390.8	98.8	337.4	7.5
3	UD53, UD62, UD63	Plešovice	PL_19	0.397471	0.030212	0.053628	0.00107	0.053273	0.001583	0.196038		339.8	21.9	336.6	6.7	340.6	68	336.9	6.4
3	UD53, UD62, UD63	Plešovice	PL_20	0.397762	0.02988	0.053943	0.001084	0.053262	0.001619	0.297724		340.1	21.7	338.4	6.7	340.6	68	338.6	6.4
3	UD53, UD62, UD63	Plešovice	PL_21	0.399297	0.030259	0.053616	0.001072	0.054179	0.001694	0.282099		341.1	22	336.6	6.7	378.4	70.5	337	6.4
3	UD53, UD62, UD63	Plešovice	PL_22	0.399769	0.030162	0.05341	0.00108	0.054321	0.001654	0.391224		341.5	21.9	335.4	6.7	382.5	70.4	335.9	6.4
3	UD53, UD62, UD63	Plešovice	PL_23	0.39419	0.029846	0.053604	0.001139	0.053435	0.001653	0.329531		337.4	21.7	336.6	6.7	344.8	72	336.7	6.4
3	UD53, UD62, UD63	Plešovice	PL_24	0.40036	0.030291	0.053611	0.001139	0.053975	0.001601	0.307746		341.9	22	336.6	6.7	370	66.7	337	6.4
3	UD53, UD62, UD63	Plešovice	PL_25	0.39442	0.030114	0.054038	0.001221	0.052748	0.00184	0.488245		337.6	21.9	339	7.3	314.9	77.7	338.9	7
3	UD53, UD62, UD63	Plešovice	PL_26	0.395956	0.031622	0.053872	0.001251	0.052993	0.002032	0.165187		338.7	23	338.4	8	327.8	85.6	338.5	7.5
3	UD53, UD62, UD63	GJ-1	GJ-1 1	0.80719	0.060258	0.098168	0.001926	0.05981	0.001709	0.436446		600.9	33.9	603.9	11.2	595.4	61.6	603.6	10.6
3	UD53, UD62, UD63	GJ-1	GJ-1 2	0.808929	0.060165	0.097233	0.001886	0.060033	0.001654	0.420929		601.8	33.8	598	11.2	602.6	61.3	598.4	10.6
3	UD53, UD62, UD63	GJ-1	GJ-1_3	0.820919	0.061114	0.098988	0.001972	0.060232	0.001673	0.447467		608.6	34.1	608.5	11.7	609.8	61	608.5	11.1
3	UD53, UD62, UD63	GJ-1	GJ-1_4	0.819982	0.061494	0.097714	0.001906	0.060604	0.001763	0.445755		608	34.3	600.9	11.2	624.1	64.1	601.6	10.6
3	UD53, UD62, UD63	GJ-1	GJ-1_5	0.810003	0.061208	0.098617	0.002162	0.059621	0.001757	0.344996		602.5	34.3	606.2	12.9	588.1	65.5	605.7	12.1
3	UD53, UD62, UD63	GJ-1	GJ-1_6	0.8044	0.061778	0.098307	0.002302	0.059292	0.001932	0.336374		599.3	34.8	604.4	13.5	577.2	69.6	603.8	12.6
3	UD53, UD62, UD63	GJ-1	GJ-1_7	0.818983	0.062897	0.098711	0.002094	0.059722	0.001865	0.298076		607.5	35.1	606.8	12.3	591.7	69	606.9	11.6
3	UD53, UD62, UD63	GJ-1	GJ-1_8	0.804414	0.060952	0.098296	0.001962	0.05916	0.001765	0.295223		599.3	34.3	604.4	11.7	573.5	66.1	603.9	11.1
3	UD53, UD62, UD63	GJ-1	GJ-1_9	0.804863	0.061183	0.099236	0.002353	0.058792	0.001842	0.387821		599.6	34.4	609.7	14.1	558.7	66.7	608.3	13
3	UD53, UD62, UD63	GJ-1	GJ-1_10	0.807958	0.062277	0.098938	0.002129	0.059139	0.00194	0.210812		601.3	35	608	12.3	569.8	70	607.2	11.6
3	UD53, UD62, UD63	GJ-1	GJ-1_11	0.821935	0.062696	0.098187	0.002183	0.060507	0.001942	0.366673		609.1	34.9	603.9	12.9	620.5	67.8	604.5	12.1
3	UD53, UD62, UD63	GJ-1	GJ-1_12	0.810881	0.062751	0.098791	0.002248	0.059302	0.001991	0.248329		603	35.2	607.4	12.9	577.2	73.3	606.8	12.1
3	UD53, UD62, UD63	GJ-1	GJ-1_13	0.807344	0.062603	0.09903	0.002389	0.058842	0.002074	0.371212		600.9	35.2	608.5	14.1	558.7	77.9	607.5	13.1
3	UD53, UD62, UD63	GJ-1	GJ-1_14	0.801647	0.060149	0.098331	0.001997	0.05883	0.001643	0.291888		597.7	33.9	604.4	11.7	558.7	59.3	603.7	11.1
3	UD53, UD62, UD63	GJ-1	GJ-1_15	0.811071	0.062016	0.09928	0.002403	0.059374	0.002046	0.476578		603.1	34.8	610.3	14.1	580.8	73.1	609.3	13
3	UD53, UD62, UD63	GJ-1	GJ-1_16	0.816429	0.06362	0.098505	0.002429	0.059801	0.002033	0.339896		606	35.6	605.6	14.1	595.4	72.5	605.7	13.1
3	UD53, UD62, UD63	GJ-1	GJ-1 17	0.806186	0.061633	0.097806	0.002027	0.059489	0.001868	0.259679		600.3	34.6	601.5	11.7	584.5	69.3	601.4	11.1
3	UD53, UD62, UD63	GJ-1	GJ-1 18	0.823563	0.063418	0.099109	0.002126	0.060499	0.002067	0.294032		610.1	35.3	609.1	12.3	620.5	74.9	609.2	11.6
3	UD53, UD62, UD63	GJ-1	GJ-19	0.808788	0.060949	0.09755	0.001881	0.059854	0.001798	0.359241		601.8	34.2	600.3	11.2	599	65.1	600.5	10.6
3	UD53, UD62, UD63	GJ-1	GJ-20	0.817697	0.061763	0.097298	0.001923	0.060638	0.00185	0.380984		606.8	34.5	598.6	11.2	624.1	67.6	599.3	10.6
3	UD53, UD62, UD63	GJ-1	GJ-21	0.812666	0.06363	0.097797	0.00242	0.06087	0.002581	0.491575		604	35.6	601.5	14.1	634.7	91.9	601.8	13.1
3	UD53, UD62, UD63	GJ-1	GJ-22	0.818814	0.064042	0.097628	0.002271	0.060663	0.002285	0.358848		607.4	35.7	600.3	13.5	627.7	81.7	601.2	12.7
3	UD53, UD62, UD63	GJ-1	GJ-1_23	0.814463	0.063254	0.097407	0.002202	0.060278	0.002064	0.226405		605	35.4	599.2	12.9	613.4	75.2	599.8	12.2
3	UD53, UD62, UD63	GJ-1	GJ-1_24	0.808661	0.062464	0.09787	0.00207	0.059771	0.001974	0.195257		601.7	35.1	602.1	12.3	595.4	72.5	602.1	11.6
3	UD53, UD62, UD63	GJ-1	GJ-1_25	0.811019	0.062032	0.099421	0.002276	0.058646	0.001851	0.342566		603	34.8	610.9	13.5	551.3	70.8	609.9	12.6
3	UD53, UD62, UD63	GJ-1	GJ-1_26	0.814552	0.063688	0.099141	0.002249	0.059108	0.002124	0.28024		605	35.6	609.1	12.9	569.8	77.3	608.7	12.1
3	UD53, UD62, UD63	91500	Z_91500_1	1.86892	0.142879	0.179348	0.003647	0.075471	0.002448	0.280838		1070.1	50.6	1063.1	19.7	1080.9	63.8	1064.1	18.4
3	UD53, UD62, UD63	91500	Z_91500_2	1.85939	0.142649	0.179802	0.003764	0.074722	0.00246	0.358821		1066.8	50.6	1065.9	20.8	1059.5	67.4	1066	19.2
3	UD53, UD62, UD63	91500	Z_91500_3	1.83963	0.140201	0.179142	0.003668	0.074237	0.002491	0.516302		1059.7	50.1	1062.1	20.2	1046	67.9	1061.7	18.8
3	UD53, UD62, UD63	91500	Z_91500_4	1.8298	0.141445	0.179282	0.003863	0.074161	0.002553	0.302888		1056.2	50.7	1063.1	21.3	1046	70.7	1062.1	19.7
3	UD53, UD62, UD63	91500	Z_91500_5	1.83474	0.140986	0.180039	0.003797	0.074055	0.002517	0.353385		1058	50.5	1067	20.8	1043.3	68.1	1065.7	19.2
3	UD53, UD62, UD63	91500	Z_91500_6	1.85935	0.142617	0.177454	0.003824	0.075913	0.002505	0.361791		1066.8	50.6	1053.3	20.8	1091.5	66	1055.2	19.3
3	UD53, UD62, UD63	91500	Z_91500_7	1.82744	0.140143	0.177838	0.003781	0.074635	0.002437	0.304407		1055.3	50.3	1054.9	20.8	1056.8	64.8	1055	19.2
3	UD53, UD62, UD63	91500	Z_91500_8	1.86686	0.143075	0.17925	0.003797	0.075941	0.002501	0.258235		1069.4	50.7	1063.1	20.8	1091.5	66	1064	19.3
3	UD53, UD62, UD63	91500	Z_91500_9	1.8453	0.142405	0.178759	0.003777	0.075061	0.002545	0.268437		1061.8	50.8	1060.4	20.8	1070.3	66.9	1060.6	19.3
3	UD53, UD62, UD63	91500	Z_91500_10	1.88115	0.145087	0.180356	0.003903	0.075333	0.002526	0.35669		1074.5	51.1	1069.2	21.3	1075.6	66.7	1069.9	19.7
3	UD53, UD62, UD63	91500	Z_91500_11	1.8542	0.143281	0.179638	0.003885	0.074603	0.002622	0.326687		1064.9	51	1064.8	21.3	1056.8	70.2	1064.8	19.7
3	UD53, UD62, UD63	91500	Z_91500_12	1.81284	0.138612	0.178553	0.003784	0.073914	0.002512	0.449429		1050.1	50	1059.3	20.8	1037.8	68.3	1058	19.2
3	UD53, UD62, UD63	91500	Z_91500_13	1.89003	0.144643	0.179316	0.003812	0.076089	0.002534	0.362531		1077.6	50.8	1063.1	20.8	1096.8	65.8	1065.2	19.3
3	UD53, UD62, UD63	91500	Z_91500_14	1.83716	0.140875	0.178771	0.003854	0.074401	0.002413	0.327552		1058.9	50.4	1060.4	21.3	1051.4	65	1060.2	19.7
3	UD53, UD62, UD63	91500	Z_91500_15	1.86396	0.142547	0.180261	0.003872	0.07502	0.002407	0.294787		1068.4	50.5	1068.6	21.3	1067.6	64.3	1068.6	19.7
3	UD53, UD62, UD63	91500	Z_91500_17	1.87039	0.145741	0.181367	0.003862	0.074847	0.002695	0.24519		1070.7	51.5	1074.6	21.3	1062.2	72.6	1074	19.7
3	UD53, UD62, UD63	91500	Z_91500_18	1.82133	0.139754	0.176869	0.003785	0.074739	0.002536	0.342913		1053.2	50.3	1050	20.8	1059.5	67.4	1050.5	19.3
3	UD53, UD62, UD63	91500	Z_91500_19	1.83199	0.141269	0.181265	0.004056	0.072943	0.002531	0.330853		1057	50.7	1074.1	22.4	1010.3	69.5	1071.2	20.4
3	UD53, UD62, UD63	91500	Z_91500_20	1.90587	0.148046	0.179884	0.003858	0.076579	0.002659	0.252087		1083.2	51.7	1066.4	21.3	1109.9	70.4	1068.8	19.8
3	UD53, UD62, UD63	91500	Z_91500_21	1.82372	0.140407	0.177571	0.003714	0.074689	0.002454	0.280456		1054	50.5	1053.8	20.3	1059.5	67.4	1053.9	18.8
3	UD53, UD62, UD63	91500	Z_91500_22	1.82643	0.141536	0.179852	0.003851	0.074006	0.002734	0.435227		1055	50.8	1066.4	21.3	1040.6	73.6	1064.7	19.6
3	UD53, UD62, UD63	91500	Z_91500_23	1.90326	0.14729	0.179862	0.004028	0.076325	0.002563	0.353808		1082.2	51.5	1066.4	21.9	1102.1	68.1	1068.8	20.2
3	UD53, UD62, UD63	91500	Z_91500_24	1.83574	0.145225	0.177927	0.003739	0.074921	0.002943	0.32494		1058.3	52	1055.5	20.2	1064.9	77.9	1055.9	18.9
3	UD53, UD62, UD63	91500	Z_91500_25	1.83178	0.143905	0.180404	0.004024	0.073814	0.002856	0.375701		1056.9	51.6	1069.2	21.8	1035.1	79.4	1067.3	20.1
3	UD53, UD62, UD63	91500	Z_91500_26	1.85181	0.143592	0.17803	0.003819	0.075704	0.00276	0.393856		1064.1	51.1	1056	20.8	1086.2	74.1	1057.2	19.3
[truncated: 538 more rows]

## Sheet: U-Pb standards statistics
			Multi-grain concordia ages
[truncated: 13 more rows]

[truncated: 2 more sheets: Lu-Hf standards data, Lu-Hf standards statistics]
