# Supplementary material for: A vast Caledonian fan and an Ediacaran arc: The contrasting provenance of Devonian clastics of Brunia (Bohemian Massif)
Source: Copernicus journal article supplement (doi:10.5194/egusphere-2026-86), 2026-01-16
Supplement: Supplementary file 3 [file S3. Full list of references for figure 9.docx]

**Section S3. Full list of references used in construction of figure 9**

(a) Brunia: Devonian: this study only; Ediacaran: Jastrzębski et al. (2021); Soejono et al. (2022); Timmerman et al. (2023).

(b) Teplá-Barrandia: Devonian: Drost et al. (2011); Strnad and Mihaljevič (2005); Žák and Sláma (2018); Ediacaran: Drost et al. (2011); Hajná et al. (2017, 2018, 2019); Kurzweil et al. (2015); Pašava et al. (2021); Žák et al. (2020, 2025).

(c) Saxo-Thuringia: Linnemann et al. (2007, 2014, 2018); Collett et al. (2020); Kühnemann et al. (2025).

(d) Góry Sowie Metamorphic Complex U-Pb: Tabaud et al. (2021); Jastrzębski et al. (2025).

(e) Fennoscandian shield: Sláma (2016); Lorentzen (2018); Linnemann et al. (2024); Slater et al. (2025); Ziemniak et al. (2025).

(f) Holy Cross Mts.: Callegari et al. (2024); Dörr et al. (2022); Żelaźniewicz et al. (2020).

(g) Ukraine: Ediacaran: Francovschi et al. (2023); Paszkowski et al. (2021); early Cambrian: Paszkowski et al. (2021).

(h) Newfoundland: Beranek et al. (2023); Gomez et al. (2025); Mills et al. (2024); Ortiz and Lowe (2024); Pollock et al. (2009).

(i) Rhenish Massif: Ediacaran: Dörr et al. (2019); Linnemann et al. (2024); Cambro-Ordovician: Herbosch et al. (2020); Linnemann et al. (2012); Willner et al. (2013).

(j) Rhenohercynian allochthon: Eckelmann et al. (2014); Mende et al. (2019); Linnemann et al. (2024).

(k) Balkan Fold and Thrust Belt: Žák et al. (2026).

(l) Istanbul Zone: Ustaömer et al. (2011); Yılmazer et al. (2025).

Reference list

Beranek, L. P., Hutter, A. D., Pearcey, S., James, C., Langor, V., Pike, C., Goudie, D., and Oldham, L.: New evidence for the Baltican cratonic affinity and Tonian to Ediacaran tectonic evolution of West Avalonia in the Avalon Peninsula, Newfoundland, Canada, Precambrian Research, 390, 107046, https://doi.org/10.1016/j.precamres.2023.107046, 2023.

Callegari, R., Mazur, S., McClelland, W. C., Barnes, C. J., Ziemniak, G., Kośmińska, K., and Majka, J.: Middle Cambrian convergence at the southwestern Baltica margin, Holy Cross Mts., Poland, and its significance for reconstructions of early Gondwana, Geoscience Frontiers, 16, 101972, https://doi.org/10.1016/j.gsf.2024.101972, 2025.

Collett, S., Schulmann, K., Štípská, P., and Míková, J.: Chronological and geochemical constraints on the pre-variscan tectonic history of the Erzgebirge, Saxothuringian Zone, Gondwana Research, 79, 27–48, https://doi.org/10.1016/j.gr.2019.09.009, 2020.

Dörr, W. and Stein, E.: Precambrian basement in the Rheic suture zone of the Central European Variscides (Odenwald), Int J Earth Sci (Geol Rundsch), 108, 1937–1957, https://doi.org/10.1007/s00531-019-01741-7, 2019.

Dörr, W., Stein, E., Kirchner, F., Meinaß, H. P., and Velledits, F.: Provenance of lower Palaeozoic metasediments of the East Odenwald (Mid-German-Crystalline Zone, Variscides)—a correlation with the East European Platform (Poland), Int J Earth Sci (Geol Rundsch), 111, 3–25, https://doi.org/10.1007/s00531-021-02103-y, 2021.

Drost, K., Gerdes, A., Jeffries, T., Linnemann, U., and Storey, C.: Provenance of Neoproterozoic and early Paleozoic siliciclastic rocks of the Teplá-Barrandian unit (Bohemian Massif): Evidence from U–Pb detrital zircon ages, Gondwana Research, 19, 213–231, https://doi.org/10.1016/j.gr.2010.05.003, 2011.

Eckelmann, K., Nesbor, H.-D., Königshof, P., Linnemann, U., Hofmann, M., Lange, J.-M., and Sagawe, A.: Plate interactions of Laurussia and Gondwana during the formation of Pangaea — Constraints from U–Pb LA–SF–ICP–MS detrital zircon ages of Devonian and Early Carboniferous siliciclastics of the Rhenohercynian zone, Central European Variscides, Gondwana Research, 25, 1484–1500, https://doi.org/10.1016/j.gr.2013.05.018, 2014.

Francovschi, I., Shumlyanskyy, L., Soesoo, A., Tarasko, I., Melnychuk, V., Hoffmann, A., Kovalick, A., Love, G., and Bekker, A.: U–Pb geochronology of detrital zircon from the Ediacaran and Cambrian sedimentary successions of NE Estonia and Volyn region of Ukraine: Implications for the provenance and comparison with other areas within Baltica, Precambrian Research, 392, 107087, https://doi.org/10.1016/j.precamres.2023.107087, 2023.

Gómez, N., Lowe, D., Mills, A., Kommescher, S., and Lam, R.: Interplay of Ediacaran glaciation and sediment provenance revealed by detrital zircon U-Pb geochronology and Hf isotope geochemistry in the Bonavista Peninsula (Newfoundland), Geological Society of America Bulletin, 138, 278–298, https://doi.org/10.1130/b38347.1, 2025.

Hajná, J., Žák, J., and Dörr, W.: Time scales and mechanisms of growth of active margins of Gondwana: A model based on detrital zircon ages from the Neoproterozoic to Cambrian Blovice accretionary complex, Bohemian Massif, Gondwana Research, 42, 63–83, https://doi.org/10.1016/j.gr.2016.10.004, 2017.

Hajná, J., Žák, J., Dörr, W., Kachlík, V., and Sláma, J.: New constraints from detrital zircon ages on prolonged, multiphase transition from the Cadomian accretionary orogen to a passive margin of Gondwana, Precambrian Research, 317, 159–178, https://doi.org/10.1016/j.precamres.2018.08.013, 2018.

Hajná, J., Žák, J., Ackerman, L., Svojtka, M., and Pašava, J.: A giant late Precambrian chert-bearing olistostrome discovered in the Bohemian Massif: A record of Ocean Plate Stratigraphy (OPS) disrupted by mass-wasting along an outer trench slope, Gondwana Research, 74, 173–188, https://doi.org/10.1016/j.gr.2018.10.010, 2019.

Herbosch, A., Liégeois, J.-P., Gärtner, A., Hofmann, M., and Linnemann, U.: The Stavelot-Venn Massif (Ardenne, Belgium), a rift shoulder basin ripped off the West African craton: Cartography, stratigraphy, sedimentology, new U-Pb on zircon ages, geochemistry and Nd isotopes evidence, Earth-Science Reviews, 203, 103142, https://doi.org/10.1016/j.earscirev.2020.103142, 2020.

Jastrzębski, M., Żelaźniewcz, A., Sláma, J., Machowiak, K., Śliwiński, M., Jaźwa, A., and Kocjan, I.: Provenance of Precambrian basement of the Brunovistulian Terrane: New data from its Silesian part (Czech Republic, Poland), central Europe, and implications for Gondwana break-up, Precambrian Research, 355, 106108, https://doi.org/10.1016/j.precamres.2021.106108, 2021.

Jastrzębski, M., Żelaźniewicz, A., Sláma, J., Krzemińska, E., and Śliwiński, M.: The Eo-Variscan domain in the Variscan belt: New data from the Sudetes, southern Poland, Lithos, 504–505, 108058, https://doi.org/10.1016/j.lithos.2025.108058, 2025.

Kurzweil, F., Drost, K., Pašava, J., Wille, M., Taubald, H., Schoeckle, D., and Schoenberg, R.: Coupled sulfur, iron and molybdenum isotope data from black shales of the Teplá-Barrandian unit argue against deep ocean oxygenation during the Ediacaran, Geochimica et Cosmochimica Acta, 171, 121–142, https://doi.org/10.1016/j.gca.2015.08.022, 2015.

Kühnemann, V., Meinhold, G., Zeh, A., and Weber, S.: New insights into Cadomian basin evolution and stratigraphic affiliation of sedimentary units of Saxo-Thuringia, Germany: Part 2—detrital zircon U–Pb ages, Int J Earth Sci (Geol Rundsch), 114, 1005–1027, https://doi.org/10.1007/s00531-025-02533-y, 2025.

Linnemann, U., Gerdes, A., Drost, K., and Buschmann, B.: The continuum between Cadomian orogenesis and opening of the Rheic Ocean: Constraints from LA-ICP-MS U-Pb zircon dating and analysis of plate-tectonic setting (Saxo-Thuringian zone, northeastern Bohemian Massif, Germany), The Evolution of the Rheic Ocean: From Avalonian-Cadomian Active Margin to Alleghenian-Variscan Collision, https://doi.org/10.1130/2007.2423(03), 2007.

Linnemann, U., Herbosch, A., Liégeois, J.-P., Pin, C., Gärtner, A., and Hofmann, M.: The Cambrian to Devonian odyssey of the Brabant Massif within Avalonia: A review with new zircon ages, geochemistry, Sm–Nd isotopes, stratigraphy and palaeogeography, Earth-Science Reviews, 112, 126–154, https://doi.org/10.1016/j.earscirev.2012.02.007, 2012.

Linnemann, U., Gerdes, A., Hofmann, M., and Marko, L.: The Cadomian Orogen: Neoproterozoic to Early Cambrian crustal growth and orogenic zoning along the periphery of the West African Craton—Constraints from U–Pb zircon ages and Hf isotopes (Schwarzburg Antiform, Germany), Precambrian Research, 244, 236–278, https://doi.org/10.1016/j.precamres.2013.08.007, 2014.

Linnemann, U., Pidal, A. P., Hofmann, M., Drost, K., Quesada, C., Gerdes, A., Marko, L., Gärtner, A., Zieger, J., Ulrich, J., Krause, R., Vickers-Rich, P., and Horak, J.: A ~565 Ma old glaciation in the Ediacaran of peri-Gondwanan West Africa, Int J Earth Sci (Geol Rundsch), 107, 885–911, https://doi.org/10.1007/s00531-017-1520-7, 2018.

Linnemann, U., Zweig, M., Zieger-Hofmann, M., Vietor, T., Zieger, J., Haschke, J., Gärtner, A., Mende, K., Krause, R., and Knolle, F.: The Harz Mountains (Germany) – Cadomia meets Avalonia and Baltica: U–Pb ages of detrital and magmatic zircon as a key for the decoding of Pangaea’s central suture, SP, 542, 403–431, https://doi.org/10.1144/sp542-2023-52, 2024.

Linnemann, U., Bartzsch, K., Zieger-Hofmann, M., Zieger, J., Gärtner, A., Rojo-Perez, E., and Mende, K.: The Saxothuringian Zone—From Cadomian Subduction to Variscan Collision, Regional Geology Reviews, 279–345, https://doi.org/10.1007/978-3-031-82911-6_11, 2025.

Lorentzen, S., Augustsson, C., Nystuen, J. P., Berndt, J., Jahren, J., and Schovsbo, N. H.: Provenance and sedimentary processes controlling the formation of lower Cambrian quartz arenite along the southwestern margin of Baltica, Sedimentary Geology, 375, 203–217, https://doi.org/10.1016/j.sedgeo.2017.08.008, 2018.

Mende, K., Linnemann, U., Nesbor, H.-D., Militzer, A., Jansen, U., Königshof, P., Bahlburg, H., Hofmann, M., Gerdes, A., Berndt, J., and Nawrat, J.: Provenance of exotic Ordovician and Devonian sedimentary rock units from the Rhenish Massif (Central European Variscides, Germany), Tectonophysics, 755, 127–159, https://doi.org/10.1016/j.tecto.2018.10.029, 2019.

Mills, A. J., Gomez, C. N. and MacFarlane, C.: Detrital Zircon Data and Maximum Depositional Age Estimates from Sedimentary Rocks of the Connecting Point Group, Bonavista Peninsula, Avalon Zone, Newfoundland (NTS Map Sheets 2C/05 and 12). Government of Newfoundland and Labrador, Department of Industry, Energy and Technology, Geological Survey, Open File 002C/0252, 20 pages.

Ortiz, S.S. and Lowe, D. G.: Stratal evolution and provenance of a precambrian delta in a tectonically active terrane: The lower Signal Hill Group, Avalon Zone, Newfoundland, Precambrian Research, 401, 107274, https://doi.org/10.1016/j.precamres.2023.107274, 2024.

Pašava, J., Ackerman, L., Žák, J., Veselovský, F., Creaser, R. A., Svojtka, M., Luais, B., Pour, O., Šebek, O., Trubač, J., Vosáhlová, E., and Cividini, D.: Elemental and isotopic compositions of trench-slope black shales, Bohemian Massif, with implications for oceanic and atmospheric oxygenation in early Cambrian, Palaeogeography, Palaeoclimatology, Palaeoecology, 564, 110195, https://doi.org/10.1016/j.palaeo.2020.110195, 2021.

Paszkowski, M., Budzyń, B., Mazur, S., Sláma, J., Środoń, J., Millar, I. L., Shumlyanskyy, L., Kędzior, A., and Liivamägi, S.: Detrital zircon U-Pb and Hf constraints on provenance and timing of deposition of the Mesoproterozoic to Cambrian sedimentary cover of the East European Craton, part II: Ukraine, Precambrian Research, 362, 106282, https://doi.org/10.1016/j.precamres.2021.106282, 2021.

Pollock, J. C., Hibbard, J. P., and Sylvester, P. J.: Early Ordovician rifting of Avalonia and birth of the Rheic Ocean: U–Pb detrital zircon constraints from Newfoundland, JGS, 166, 501–515, https://doi.org/10.1144/0016-76492008-088, 2009.

Slama, J.: Rare late Neoproterozoic detritus in <scp>SW</scp> Scandinavia as a response to distant tectonic processes, Terra Nova, 28, 394–401, https://doi.org/10.1111/ter.12232, 2016.

Slater, B. J., Kenny, G. G., Budd, G. E., and Whitehouse, M. J.: Vast sediment dispersal in an inland sea: detrital zircon geochronology of the lower Cambrian Mickwitzia Sandstone (southern Sweden) indicates a Timanian source, JGS, 182, https://doi.org/10.1144/jgs2024-044, 2025.

Soejono, I., Schulmann, K., Sláma, J., Hrdličková, K., Hanžl, P., Konopásek, J., Collett, S., and Míková, J.: Pre-collisional crustal evolution of the European Variscan periphery: Constraints from detrital zircon U–Pb ages and Hf isotopic record in the Precambrian metasedimentary basement of the Brunovistulian Domain, Precambrian Research, 372, 106606, https://doi.org/10.1016/j.precamres.2022.106606, 2022.

Sorger, D., Hauzenberger, C. A., Finger, F., and Linner, M.: Two generations of Variscan garnet: Implications from a petrochronological study of a high-grade Avalonia-derived paragneiss from the Drosendorf unit, Bohemian Massif, Gondwana Research, 85, 124–148, https://doi.org/10.1016/j.gr.2020.04.004, 2020.

Strnad, L. and Mihaljevič, M.: Sedimentary provenance of Mid-Devonian clastic sediments in the Teplá-Barrandian Unit (Bohemian Massif): U–Pb and Pb–Pb geochronology of detrital zircons by laser ablation ICP-MS, Mineralogy and Petrology, 84, 47–68, https://doi.org/10.1007/s00710-004-0057-1, 2005.

Tabaud, A. S., Štípská, P., Mazur, S., Schulmann, K., Míková, J., Wong, J., and Sun, M.: Evolution of a Cambro-Ordovician active margin in northern Gondwana: Geochemical and zircon geochronological evidence from the Góry Sowie metasedimentary rocks, Poland, Gondwana Research, 90, 1–26, https://doi.org/10.1016/j.gr.2020.10.011, 2021.

Timmerman, M. J., Krmíček, L., Krmíčková, S., Sláma, J., Sudo, M., and Sobel, E.: Tonian–Ediacaran evolution of the Brunovistulian microcontinent (Czech Republic) deciphered from LA-ICP-MS U–Pb zircon and 40Ar/39Ar muscovite ages, Precambrian Research, 387, 106981, https://doi.org/10.1016/j.precamres.2023.106981, 2023.

Ustaömer, P. A., Ustaömer, T., Gerdes, A., and Zulauf, G.: Detrital zircon ages from a Lower Ordovician quartzite of the İstanbul exotic terrane (NW Turkey): evidence for Amazonian affinity, Int J Earth Sci (Geol Rundsch), 100, 23–41, https://doi.org/10.1007/s00531-009-0498-1, 2009.

Willner, A. P., Barr, S. M., Gerdes, A., Massonne, H.-J., and White, C. E.: Origin and evolution of Avalonia: evidence from U–Pb and Lu–Hf isotopes in zircon from the Mira terrane, Canada, and the Stavelot–Venn Massif, Belgium, JGS, 170, 769–784, https://doi.org/10.1144/jgs2012-152, 2013.

Yılmazer, S., Topuz, G., Guillong, M., Okay, A. I., Demirkaya, İ., and Uzun, F.: Revealing the early geological history of the Istanbul Zone (Far-East Avalonia) through zircon U-Pb-Hf isotopic data, Precambrian Research, 427, 107855, https://doi.org/10.1016/j.precamres.2025.107855, 2025.

Žák, J. and Sláma, J.: How far did the Cadomian ʽterranesʼ travel from Gondwana during early Palaeozoic? A critical reappraisal based on detrital zircon geochronology, International Geology Review, 60, 319–338, https://doi.org/10.1080/00206814.2017.1334599, 2017.

Žák, J., Svojtka, M., Hajná, J., and Ackerman, L.: Detrital zircon geochronology and processes in accretionary wedges, Earth-Science Reviews, 207, 103214, https://doi.org/10.1016/j.earscirev.2020.103214, 2020.

Žák, J., Svojtka, M., Damian Nance, R., and Brendan Murphy, J.: Detrital zircon record of shutdown and migration of Cadomian volcanic arcs in the Bohemian Massif, with implications for Ediacaran to early Cambrian plate kinematics, Precambrian Research, 422, 107786, https://doi.org/10.1016/j.precamres.2025.107786, 2025.

Žák, J., Svojtka, M., Gerdjikov, I., Ackerman, L., Kachlík, V., Sláma, J., Vangelov, D. A., Kounov, A., Nance, R. D., Murphy, J. B., and Míková, J.: Enigmatic granite–gneiss domes within the Balkan fold-and-thrust belt, Bulgaria: Tracers of Gondwana–Baltica proximity and large-scale terrane displacement during the waning stages of the Cadomian orogeny?, Gondwana Research, 151, 36–57, https://doi.org/10.1016/j.gr.2025.10.007, 2026.

Żelaźniewicz, A., Oberc-Dziedzic, T., and Slama, J.: Baltica and the Cadomian orogen in the Ediacaran–Cambrian: a perspective from SE Poland, Int J Earth Sci (Geol Rundsch), 109, 1503–1528, https://doi.org/10.1007/s00531-020-01858-0, 2020.
