# Supplementary material for: A vast Caledonian fan and an Ediacaran arc: The contrasting provenance of Devonian clastics of Brunia (Bohemian Massif)
Source: Copernicus journal article supplement (doi:10.5194/egusphere-2026-86), 2026-01-16
Supplement: Supplementary file [file egusphere-2026-86-RC2-supplement.pdf]

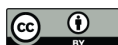

## A vast Caledonian fan and an Ediacaran arc: The contrasting provenance of Devonian clastics of Brunia (Bohemian Massif)

Stephen Collett<sup>1</sup>, Igor Soejono<sup>1</sup>, Tomáš Kumpan<sup>2</sup>, Pavel Hanžl<sup>1</sup>, Jitka Míková<sup>1</sup>, Nikol Novotná<sup>1</sup>, Jiří Sláma<sup>3</sup>

5 <sup>1</sup>Czech Geological Survey, Klárov 3, 118 21 Prague 1, Czech Republic, stephen.collett@geology.cz

<sup>2</sup>Department of Geological Sciences, Masaryk University, Kotlářská 2, 611 37 Brno, Czech Republic

<sup>3</sup>Institute of Geology of the Czech Academy of Sciences, Rozvojová 269, Prague, 16500, Czech Republic

*Correspondence to:* Stephen Collett (stephen.collett@geology.cz)

**Abstract.** Brunia is a distinctive crustal block within the European Variscides, composed of a late Neoproterozoic arc complex  
10 overlain by Ediacaran–early Cambrian cover sequences. Sparse preservation of early Paleozoic strata obscures its pre-Variscan  
paleogeography. Proposed models suggest Brunia either shared a crustal domain with adjacent parts of the Bohemian Massif,  
represented a far-eastern extension of Avalonia accreted to Baltica in the early Paleozoic, or maintained long-term connections  
to Baltica since the late Ediacaran.

To address these uncertainties, we present the first systematic study of detrital zircons (both U–Pb and Lu–Hf isotopic data)  
15 from Devonian strata overlying Brunia’s Neoproterozoic basement. Two distinct age-spectral patterns are identified. Type-1,  
widespread across Brunia, exhibit a near-unimodal late Neoproterozoic peak corresponding to locally preserved arc  
magmatism. Type-2, display a multimodal spectrum with significant Late Ordovician–Silurian and Paleoproterozoic–early  
Neoproterozoic age peaks, and only minor late Neoproterozoic input.

The Type-1 pattern reflects predominant recycling of local Brunia sources. Nearly-uniformly positive  $\epsilon_{\text{Hf}}(t)$  values in  
20 Neoproterozoic zircons contrast with the wide isotopic range typical of other Variscan terranes in Central and Western Europe,  
but are comparable with values from Avalonian strata in Newfoundland, supporting a Neoproterozoic link between West  
Avalonia and Brunia.

The Type-2 pattern broadly matches Devonian detrital zircon signatures from the British Isles, the Rhenish and Harz  
Mountains, Dobrogea, and NW Turkey delineating the northern margin of the Rheic Ocean. Strong similarity to Ordovician–  
25 Silurian Scandinavian datasets suggests original derivation from the Caledonides and confirms an Early Devonian connection  
between Brunia and Baltica.

something missing here?

**Keywords.** Bohemian Massif; Detrital Zircon; U–Pb; Lu–Hf; Avalonia; Caledonides

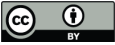

30 **1 Introduction**

The eastern termination of the European Variscan Belt is most prominently marked by the Brunia Terrane (also referred to as Brunovistulia) in the Bohemian Massif (Fig. 1a). Like the internal parts of the Bohemian Massif (Moldanubia, Teplá-Barrandia, and Saxo-Thuringia), Brunia is composed predominantly of a late Neoproterozoic magmatic arc and its (meta-)sedimentary cover (see recent review in Hanžl et al., 2025). Its western portion (Moravo-Silesian Zone) was deformed during the Variscan Orogeny and now forms allochthonous nappe units thrust over a relatively undeformed para-autochthonous pre-Variscan basement to the east. The boundary between Brunia and the rest of the Bohemian Massif is represented by the Moldanubian Thrust Zone (Fig. 1b), which has long been recognized as a significant crustal-scale boundary (Suess, 1912). However, its paleogeographic significance remains the subject of ongoing debate (e.g., Soejono et al., 2010; Jastrzębski et al., 2015; Collett et al., 2021).

40

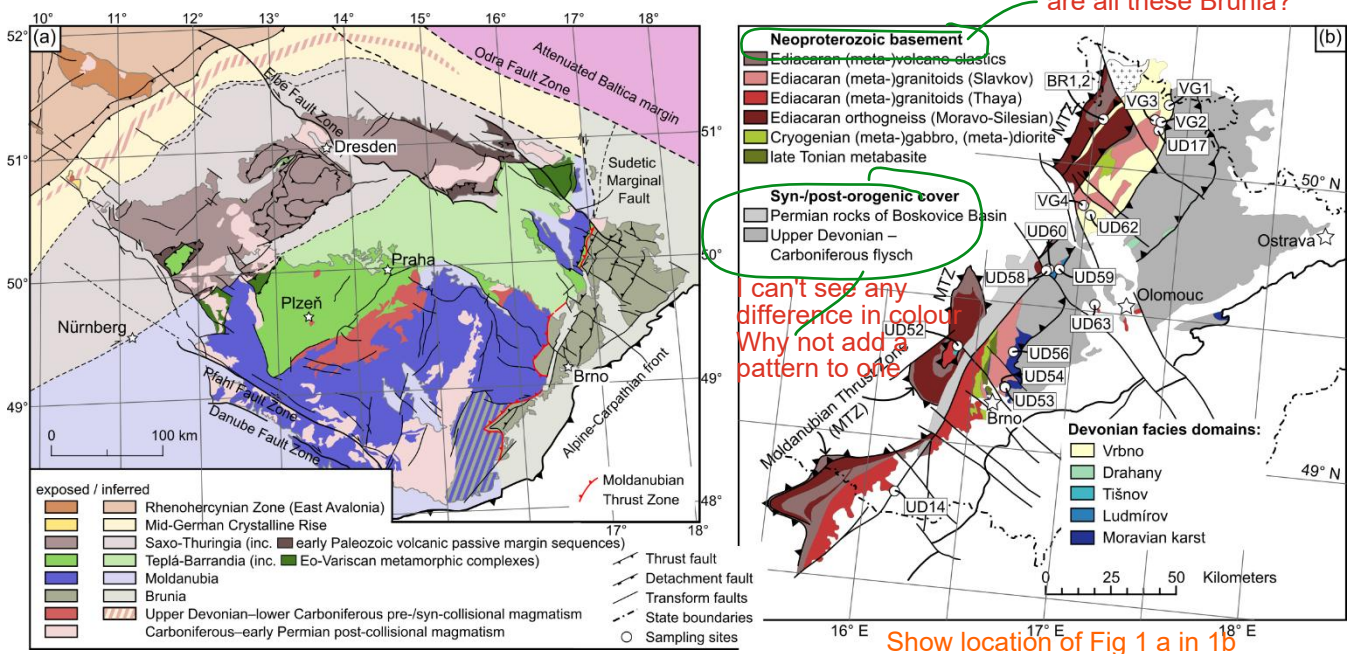

**Figure 1: (a) Geological map of the Bohemian Massif (modified from Martinez Catalan et al., 2021). (b) Sample position in detailed view of the exposed part of Brunia highlighting the different Devonian facies domains (modified after Hanžl et al., 2019 and Kalvoda et al., 2025).**

45 Geodynamically, Brunia acted as a rigid backstop against which the high-grade units of the internal Bohemian Massif were exhumed (e.g., Schulmann et al., 2009, 2014). Basic rocks are documented within the Moldanubian Thrust Zone; however, these lack true ophiolitic assemblages, and their early Cambrian age (Soejono et al., 2010; Collett et al., 2021) seemingly precludes an origin in the late Cambrian–Devonian Rheic Ocean (sensu Nance et al., 2012), which separated Laurussia from Gondwana prior to the Variscan Orogeny. These findings have led to pre-Variscan paleogeographic models proposing that Brunia, Moldanubia, and Teplá-Barrandia formed a single crustal domain (e.g., Schulmann et al., 2009, 2014; Soejono et al.,

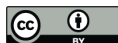

2022). This view is tentatively supported by stratigraphic parallels with the southern Variscan foreland in the Massif Central and Pyrenees (e.g., Matte et al., 1990), as well as similarities in detrital zircon spectra from Ediacaran strata across these three regions (Košler et al., 2014; Soejono et al., 2022). I don't know what this means correlations?

However, this interpretation is challenged by both paleomagnetic and faunal data, which suggest an Ediacaran to early Cambrian connection between Brunia and Baltica (e.g., Belka et al., 2002; Nawrocki et al., 2004, 2021). In contrast, the early Paleozoic record of Teplá-Barrandia exhibits stronger Gondwanan affinities (e.g., Krs et al., 2001). Nonetheless, the Neoproterozoic arc magmatism that forms the bulk of Brunia's basement is difficult to reconcile with the coeval rift-to-passive-margin evolution observed in the adjacent Polish-Ukrainian sector of Baltica (e.g., Poprawa et al., 1999, 2018). I don't see the challenge. The discussion above argues they were contiguous. It does not say anything about a separation from Baltica

Recent geochronological and isotopic studies have highlighted strong affinities between Neoproterozoic magmatism in Brunia and that in the West Avalonian terranes of Atlantic North America (see Krmičková et al., 2025 and references therein). Collett et al. (2022a) and Collett (2025) further argue that detrital zircon spectra from Ediacaran strata in Brunia correlate more closely with West Avalonia than with other components of the Bohemian Massif. West Avalonia was part of the Paleozoic Avalonian microcontinent, which is characterized by its late Ediacaran to Ordovician overstep sequence, its drift from Gondwana, and accretion to Baltica/Laurentia during the Ordovician to Silurian (Murphy et al., 2023 and references therein). However, in Brunia early Paleozoic strata are largely absent, with notable exception of the latest Ediacaran-early Cambrian clastics from which Baltica-affiliated trilobites have been documented (Belka et al., 2002). What about the Timanides? These strata are not abundant in Avalonia either

Based on this, some tectonic models propose that Brunia represents a fragment of a Neoproterozoic volcanic arc that also included West Avalonia and developed near the Amazonian margin of northern Gondwana (e.g. Finger et al., 2000; Friedl et al., 2004). In one scenario, the Brunia segment of this arc was accreted to Baltica as it translated along the Gondwanan margin during the opening of the Iapetus Ocean (e.g., Lindner et al., 2021). An alternative hypothesis suggests that Brunia (and West Avalonia) had affinities with the Timanide-Uralide margin of Baltica and were displaced around this margin in response to the early Paleozoic rotation of Baltica. Brunia remains proximal to Baltica whereas West Avalonia is translated along the northern Gondwana margin. This model is illustrated in the paleogeographic reconstructions of Nawrocki et al. (2004) and Collett et al. (2022a). when??? Timing is absolutely crucial

Yet another possibility is that the allochthonous and autochthonous parts of Brunia have contrasting paleogeographic origins: the former being derived from Avalonia, and the latter representing a long-term component of Baltica. These domains may have been juxtaposed along transform faults following the Silurian docking of Avalonia with Baltica (e.g., Oczlon et al., 2007). Resolving these competing interpretations is complicated by the limited early Paleozoic record in Brunia. Apart from the upper Ediacaran-lower Cambrian clastics, Ordovician strata preserved in deep boreholes along Brunia's eastern margin, and an exotic Silurian slice within Carboniferous flysch nappes, the succession is largely absent up to the Lower Devonian (Kalvoda et al., 2025, and references therein). Devonian strata are regionally extensive, deposited in originally disconnected, initially extensional basins, and begin with clastic successions (the so-called "Basal Clastics"). These are followed by the development of a Middle Devonian to early Carboniferous carbonate platform in more proximal parts of the basin (Hladil, 1994; Kalvoda



This is too convoluted. We need an additional statement that tells us what interpretation the authors are taking forward and why.

85 et al. 2008, 2025). In the northern allochthonous units, the distal parts of the Devonian–Carboniferous basin are characterized by deep-marine shales and volcanic rocks of either back-arc or within-plate affinity (Janoušek et al., 2014).

Even the interpretation of these Basal Clastics is controversial. Recent geochronological studies (Jastrzębski et al., 2021; Timmerman et al., 2023) suggest that some deposits mapped as Devonian may actually be late Neoproterozoic–early Cambrian in age. Jastrzębski et al. (2021) argued that quartzites lacking fossils in northern Brunia (allochthonous) have maximum depositional ages in the late Neoproterozoic and detrital zircon spectra comparable to known Ediacaran units. Timmerman et al. (2023), in contrast, dated ash layer within Basal Clastics from the southern (par-autochthonous) part of Brunia, obtaining 90 single-age zircon populations of c.550 Ma.

In this study, we present a comprehensive U–Pb and Lu–Hf isotopic analysis of detrital zircon from the Devonian clastic strata of Brunia. Our sampling targeted not only biostratigraphically constrained Devonian Basal Clastics and those with hypothesised Devonian age, but also clastic intercalations within the overlying carbonate deposits. These data reveal a localized 95 contribution from a distal source, likely derived from the Caledonides of Scandinavia, and a dominant contribution from local sources, representing erosion of the late Neoproterozoic arc. The former clearly links Brunia to Laurussia in the Early Devonian, while the latter provides insight into Brunia’s late Neoproterozoic affinities. Importantly, it is also demonstrated that detrital zircon spectra alone are a poor tool to resolve stratigraphic age of the Basal Clastics.

## 2 Regional Geology

100 Brunia is a late Neoproterozoic volcanic arc terrane currently located between Baltica to the east and the highly deformed Gondwana-derived blocks of the Paleozoic Variscan orogenic belt to the west. At its western margin, parts of Brunia, specifically the Moravian and Silesian nappes, were metamorphosed during the Variscan Orogeny and thrust over a (para-)autochthonous Neoproterozoic basement (Suess, 1912; Schulmann et al., 1991). In the far eastern part of the terrane, borehole intersections reveal a horst structure containing Archean and Paleoproterozoic basement (Żelázquez and Fanning, 2020); 105 however, it remains unclear whether this represents Brunia’s basement or underthrust crust of Baltica. Paleoproterozoic gneiss is also documented in allochthonous units of the Silesian part of Brunia (Collett et al., 2021), and Mesoproterozoic gneiss in the Drosendorf Unit in Lower Austria has been attributed to Brunia despite occurring in the hanging wall of the Moldanubian Thrust Zone (Lindner et al., 2021).

Elsewhere, the crystalline basement of Brunia is dominated by Neoproterozoic magmatic rocks. The oldest of these crops out 110 in a narrow north–south trending belt known as the Central Basic Belt, which includes a volcanic segment (the Metabasite Zone) to the east and a dominantly plutonic segment (the Diorite Zone) to the west (Fig.1b). The Metabasite Zone contains late Tonian (~730 Ma) tholeiitic basalts alongside sporadic primitive rhyolitic lavas and tuffs (Finger et al., 2000; Hanžl et al., 2019; Timmerman et al., 2023). In contrast, the Diorite Zone is composed of Cryogenian (~650 Ma) primitive magmatic rocks with volcanic arc affinities (Hanžl et al., 2019).



you need to be more careful in your description. Technically, they cannot be similar to both, if you previously stated the "both" were dissimilar.  
I think you mean the data show a range that spans both Thaya and Slavkov domains

both?

115 The Central Basic Belt divides two late Neoproterozoic magmatic domains with contrasting isotopic signatures: to the east, the Slavkov Domain is dominated by primitive arc-related granitoids (Finger et al., 2000; Krmíčková et al., 2025), whereas the Thaya Domain to the west consists of isotopically evolved granitoids (Finger et al., 2000; Soejono et al., 2017). Magmatism in both domains is broadly coeval, spanning the early Ediacaran (c.630–580 Ma) and are interpreted to reflect an Andean-type arc setting (see recent review in Hanžl et al., 2025).

120 The migmatized host rocks of the Thaya Domain contain abundant inherited zircons with Paleoproterozoic to early Neoproterozoic ages (Soejono et al., 2022), which also appear as xenocrysts in the late Neoproterozoic Bíteš orthogneiss of the Moravian nappes (Friedl et al., 2000; Soejono et al., 2017). The Bíteš orthogneiss are even more isotopically evolved than the Thaya Domain (Soejono et al., 2017); whereas orthogneiss in the Silesian nappes show isotopic and geochronological similarities to both the Thaya and Slavkov domains granitoids (Hegner and Kröner, 2000; Hanžl et al., 2007). Ediacaran

125 paragneisses encountered in boreholes in southern and eastern Brunia and in outcrop in the Silesian nappes in northern Brunia yield nearly unimodal detrital zircon age spectra centred on the late Neoproterozoic (Jastrzębski et al., 2021; Soejono et al., 2022; Timmerman et al., 2023). Upper Ediacaran–Cambrian siliciclastics found in boreholes in NE part of Brunia record early terrestrial deposition followed by later marine sedimentation (Moczyłowska, 1997). Early Cambrian trilobites within this succession have apparent Baltica affinity (Belka et al., 2002) and detrital zircon spectra are similar to those recorded in the

130 Ediacaran paragneisses (Habryn et al., 2020).  
Ok, you have constructed this sentence about affinity; what affinity are these paragneisses?

Ordovician to Carboniferous volcano-sedimentary sequences unconformably cover the Neoproterozoic-Cambrian basement. Siliciclastic Ordovician strata are documented only from boreholes along Brunia's northern boundary in Poland, while Silurian rocks are known solely from a single tectonic fragment within Carboniferous flysch (Kalvoda et al., 2025, and references therein). In contrast, Devonian to lower Carboniferous strata are widespread, deposited in rift basins typically beginning with coarse-grained clastic deposits that grade into fine-grained clastics, cherts, and limestone associations (Kalvoda et al. 2008; Fig. 2). Some of these rift basins are associated with magmatic rocks displaying supra-subduction signatures, suggesting rifting occurred in a back-arc setting (Janoušek et al., 2014). The clastic components of these Devonian basins are the primary focus of this study and are described in more detail below. During the early Carboniferous, a transition to a compressional regime associated with the Variscan Orogeny is recorded, with the latest Tournaisian to earliest Serpukhovian deep-marine siliciclastics of the Moravo-Silesian Culm Basin being deposited (Kumpera and Martinec, 1995).



Facies Domains:

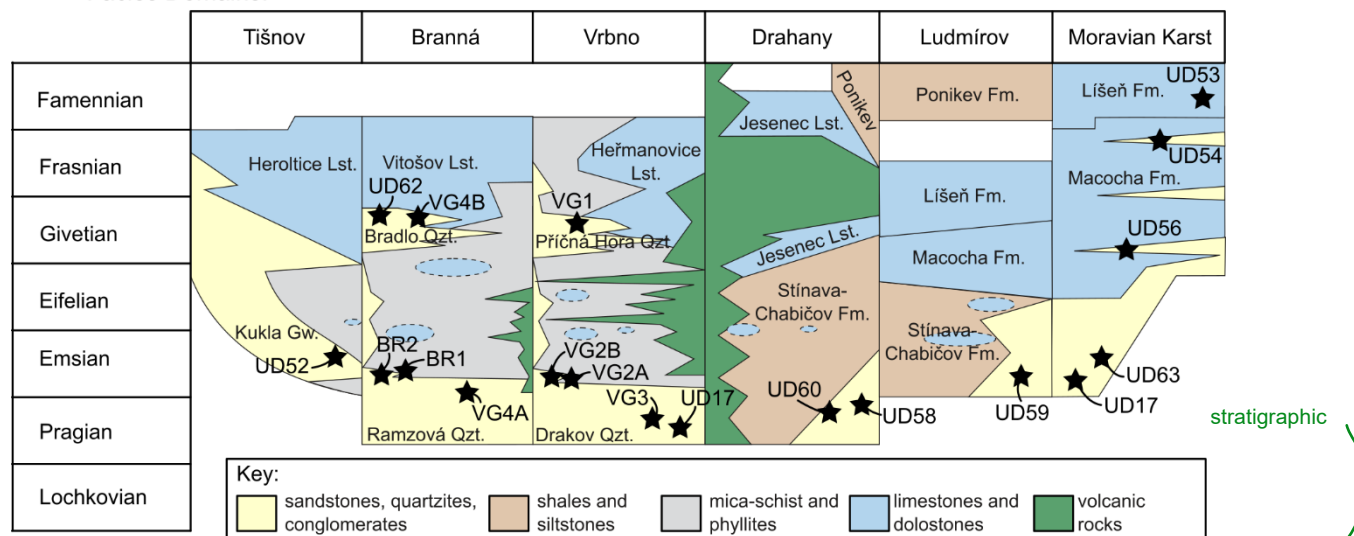

Figure 2: Lithostratigraphic chart of the Devonian facies domains of Brunia with approximate position of the studied samples marked by black stars. Modified from Kalvoda et al. (2025).

## 2.1 Stratigraphy and depositional settings of siliciclastics in Brunia Devonian basins

145 The Devonian volcano-sedimentary cover of the Brunia basement occurs in several distinct tectonic units and outcrop areas (Fig. 1b). Each of these units represents record of specific settings in basin-depth transect. The shallowest marine environments are represented by the Moravian Karst and Tišnov facies domains, which are dominated by carbonate platform deposits and preserved as (para)autochthonous units. In contrast, the platform-to-basin transition Ludmírov Facies Domain together with the more distal Vrbno and Drahaný facies domains are preserved in allochthonous units incorporated into the Culm nappe structures, which crop out in narrow tectonic belts (Zukalová and Chlupáč, 1982; Kalvoda et al., 2025).

150

### 2.1.1 Moravian Karst Facies Domain

The clastic formation situated between the Neoproterozoic Brno Massif and the carbonates of the Devonian Macocha Formation was traditionally interpreted as Devonian continental deposits and referred to as the Devonian basal clastic formation (Zukalová and Chlupáč, 1982). However, subsequent analysis of drill cores from subsurface occurrences beneath the Western Carpathians revealed deposits containing marine Ediacaran to early Cambrian acritarchs, overlain by clastics with Devonian acritarchs and palynomorphs (Mikuláš et al., 2008; Vavrdová and Dašková, 2011).

155

Sedimentological and ichnological evidence has led to a reinterpretation of these deposits as representing alluvial and braided delta systems prograding into a marine basin. This interpretation explains the observed alternation of continental, brackish, and marine facies (Mikuláš et al., 2008; Vavrdová and Dašková, 2011). The majority of the drilled strata are now considered

160 lower Cambrian in age, consisting of less mature clastics compared to the thinner, overlying Devonian succession (Mikuláš et al., 2008).



give precise age

165 A late Neoproterozoic age for the lowermost part of the clastic strata within the Moravian Karst is supported by radiometric dating of a tuffitic interbed (Timmerman et al., 2023). Additionally, the lower portions (Neoproterozoic to Cambrian?) of the exposed clastic strata are generally less mature than the upper parts (Devonian?). Exceptionally large outcrops of clastic strata along the Metabasite Zone in the central Brno Massif (Babí lom Zone) exhibit sedimentological features indicative of deposition in an alluvial environment, including debris flow, braided river, and meandering river facies (Nehyba et al., 2001; Wojewoda et al., 2015). The presence of meandering river deposits and mature quartzose conglomerates tentatively supports a Devonian age, as meandering rivers are considered rare in the largely unvegetated pre-Devonian landscape (Gibling and Davies, 2012).

170 Consequently, similarly mature facies sampled from the Moravian Karst Facies Domain outcrop at Skalky in the Čelechovice area (sample UD63, Fig. 3a) are also assigned to the Devonian. With a considerable degree of reservation, we also assign the clastic formation overlying the Dyje Massif at Tasovice near Znojmo (sample UD14) to the Moravian Karst Facies Domain and to the Devonian. However, distinguishing between Ediacaran–Cambrian and Devonian clastic strata in the Moravian Karst, Čelechovice and Tasovice outcrops remains challenging due to the lack of definitive paleontological evidence. The age of the

175 upper boundary of the basal clastic formation is inferred based on the surrounding earliest limestone beds, which yield Late Emsian to Early Eifelian corals in the Moravian Karst and Čelechovice (Hladil, 1994).

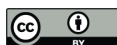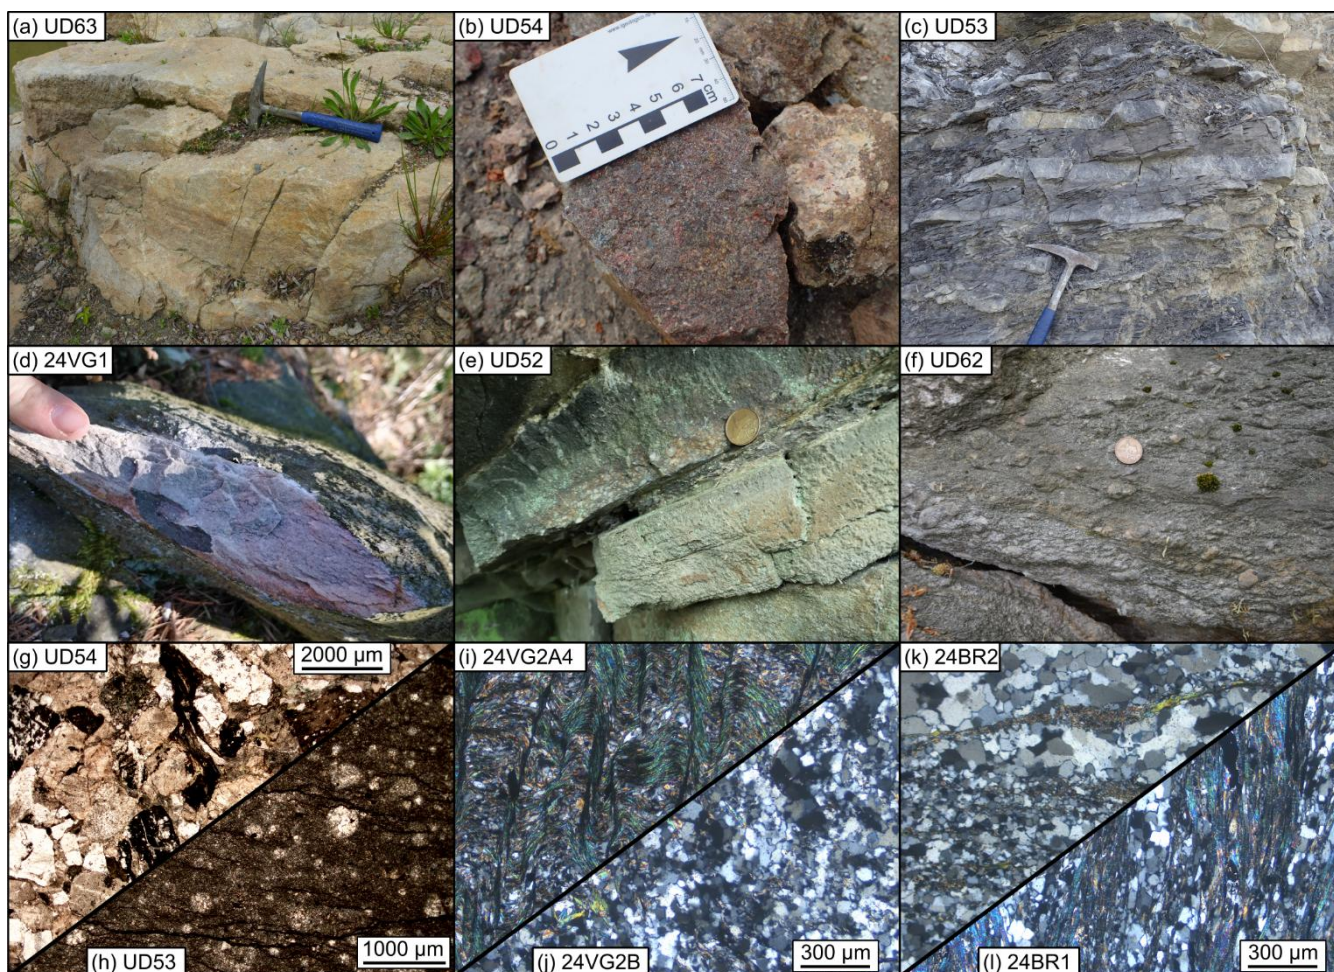

**Figure 3: Selected field photographs and thin section photographs from representative samples. Refer to Table 1 for location and description of each sample.**

Why not have the descriptions here??

A more reliable chronostratigraphic framework is available for clastic wedges within the fossiliferous limestones of the Macocha Formation. In this study, we sampled Lower Givetian immature sandstone between the 1st and 2nd megacycles (Lažánky–Zrcadlem, UD56) and Upper Frasnian petromictic conglomerate between the 3rd and 4th megacycles (Brno–Hády, UD54, Fig. 3b, g). These clastic wedges reflect the progradation of continental facies into the carbonate platform during regression phases. The clastic intercalations between the 1st and 2nd megacycles show upward coarsening from shales to sandstones, likely indicating a transition from marginal marine to continental environments (Hladil et al., 1999). The reddish petromictic Hády conglomerate at the base of the 4th megacycle contains a diverse association of magmatic, metamorphic and sedimentary rocks, including Devonian limestones (Krmíček and Přichystal, 2007) and represents an alluvial breccia.

The stratigraphically youngest sample (UD53) is not environmentally related to basal clastics, and comes from the lowermost part of the Líšeň Formation, where marlstones to silty limestones alternate with conodont-bearing limestones of Lower

Famennian age (Fig. 3c, h). Paleontological and sedimentological evidence consistently indicate a deep-marine lower slope setting, characterized by distal turbidite deposition (Kumpan et al., 2021).

### 2.1.2 Ludmírov Facies Domain

The Ludmírov Facies Domain consists of a shaly succession of the Stínava–Chabičov Formation (Petrovice Shale), which laterally transitions into basal clastics in its lower part and into the Macocha Formation in its upper part. In the Konice–Mladeč Belt, where sample UD59 was collected at Jalovčí, quartzose conglomerates and sandstones grade upward into carbonate-rich sandstones containing marine fossils, recording the transition from terrestrial to marine depositional environments. A Late Emsian fauna, including brachiopods, crinoids, and corals (Chlupáč and Svoboda, 1963), indicates nearshore marine conditions. The overlying Petrovice Shale yields a biostratigraphically well-constrained Late Emsian to Early Eifelian marine fauna, documenting a progressive marine transgression (Havlíček and Mergl, 1990).

### 2.1.3 Drahany Facies Domain

The Drahany Facies Domain is dominated by shales and slates of the Stínava–Chabičov Formation, which interfinger with volcanic products and the Jesenec Limestone associated with volcanic elevations. The basal clastics consist of relatively immature conglomerates and sandstones deposited under marine conditions, as evidenced by the presence of brachiopods, corals, and crinoids (Chlupáč and Svoboda, 1963). Coarser siliciclastic deposits at the base of the succession were sampled at Šubířov (UD58) and Liškovy Skály (UD60). The stratigraphic position beneath the overlying Stínava–Chabičov Formation suggests an Early Emsian or possibly Pragian age for these basal clastics (Chlupáč 1961, 2000).

### 2.1.4 Vrbno Facies Domain

In the Vrbno Facies Domain, the basal Drakov Quartzite is recognized as a regionally significant correlative horizon. Brachiopods and other macrofauna constrain its age to the Pragian–Emsian interval (Chlupáč, 1989). The protolith consists of mature quartzose sandstone (UD17, 24VG3, 24VG2B; Fig. 3j). Marine fauna—including bivalves, brachiopods, and trilobites—confirm deposition in nearshore settings above the fair-weather wave base, an interpretation further supported by the presence of the ichnofossil Arenicolites. Intervals containing abundant chlorite–muscovite phyllite (24VG2A, Fig. 3i) intercalations likely represent more distal environments situated between the fair-weather and storm wave bases. The overlying succession of schists, metabasites, and quartzites is assigned to the Middle and Upper Devonian based on its stratigraphic position and the occurrence of sparse conodonts and microfossils within carbonate intercalations (Koverdinský and Zikmundová, 1966; Hladil et al., 1987). The Heřmanovice Limestone, found in the upper part of the sequence, is dated as Givetian–Frasnian in age (Hladil et al., 1999), which places the underlying Příčná Hora Quartzite (24VG1; Fig. 3d) in the Givetian. This age assignment is further corroborated by its correlation with the Bradlo Quartzites of the Branná Facies Domain (see below).

### 2.1.5 Tišnov Facies Domain

The Tišnov Facies Domain is characterized by a clastic succession comprising the Závist and Květnice facies. Sample UD52 (Fig. 3e) ~~for this study~~ was taken from the Závist Facies, represented by the thick Kukla Greywacke, which is biostratigraphically constrained to the Emsian, Eifelian, and Givetian based on palynomorphs and brachiopods (Hladil et al., 1999). The Kukla Greywacke consists of immature, matrix-rich sandstones interbedded with slates and petromictic conglomerates that also contain limestone clasts. ~~Both~~<sup>XP</sup> petrological and paleontological evidence indicate a marine origin, with deposition likely occurring as slope sediments from submarine gravity flows.

In contrast, the thinner succession of the Květnice Facies exhibits features indicative of shallow marine or ~~even~~<sup>X</sup> supratidal environments (Dvořák and Skoček, 1997). This clastic sequence is overlain by carbonate rocks, which appear from the Givetian onwards, as evidenced by the presence of stromatoporoids (Koverdinský and Hladil, 1985).

### 2.1.6 Branná Facies Domain

The Branná Facies Domain is discriminated for the purposes of this study in light of our detrital zircon isotopic data. ~~From the point of view of depositional settings, I~~ shows transitional features between the distal Vrbno Facies Domain (lower part of the succession; Koverdinský, 1993) and the proximal Tišnov Facies Domain (the upper part of the succession with limestones; Koverdinský and Hladil, 1985). The basal Ramzová Quartzite (24BR1, 2; 24VG4B) of the Branná Group is unfossiliferous ~~but~~<sup>or j</sup> has been correlated with the Lower Devonian Drakov Quartzite based on lithostratigraphic relationships (Fig. 3k, l) and regional mapping near Jeseník (Koverdinský, 1993). Similarly, the stratigraphically higher Bradlo Quartzite also lacks fossils but interfingers with the Vitošov Limestone. Givetian macrofauna identified within the Vitošov Limestone and other undifferentiated limestone bodies of the Branná Group (Koverdinský and Hladil, 1985) suggest a Givetian age for the Bradlo Quartzite (24VG4B, UD62; Fig. 3f).

The correlation of the Ramzová Quartzite with the marine Drakov Quartzite, along with the interfingering relationship between the Bradlo Quartzite and the Givetian Vitošov Limestone, strongly supports marine deposition for these quartzite units. The Bradlo Quartzite was likely deposited in nearshore marine settings along the platform margin or as siliciclastic wedges intercalated within the carbonate platform. Its high textural maturity reflects prolonged reworking in wave-dominated high-energy shallow marine environments.

## 3 Analytical Methods

A total of 19 samples were prepared for zircon separation, the locations and summary petrographic descriptions of these samples are provided in Table 1. Zircon grains were extracted using conventional methods, including crushing, Wilfley concentration table, magnetic, and heavy liquid separations. The majority of the zircon separates were abundant (n > 1000 grains) and highly pure (>90% zircon). Given the high quality of the separates and to avoid unintentional biases from hand-picking, zircons were mass-mounted onto acrylic.

Type text here

something missing here??

Type text here

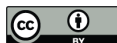

check untidy formnating

**Table 1: Summary description of studied samples and their location**

| Sample #                            | Location                                  | Sample description                                                                                                                                                                                                                                                                                         | Co-ordinates |             | Depositional age              | Number of data points |       | Age distribution |
|-------------------------------------|-------------------------------------------|------------------------------------------------------------------------------------------------------------------------------------------------------------------------------------------------------------------------------------------------------------------------------------------------------------|--------------|-------------|-------------------------------|-----------------------|-------|------------------|
|                                     |                                           |                                                                                                                                                                                                                                                                                                            | Lat          | Long        |                               | U-Pb                  | Lu-Hf |                  |
| <i>Moravian Karst Facies Domain</i> |                                           |                                                                                                                                                                                                                                                                                                            |              |             |                               |                       |       |                  |
| UD63                                | old quarry Skalky, NW of Kaple            | Coarse grained sandstone to very fine-grained conglomerate, with predominance of quartz grains (>90 %), with minor muscovite (~2 %) and feldspar (<1 %) admixture. Matrix sericitic to silty-quartzose, silicified in places.                                                                              | 49.534<br>9  | 17.096<br>6 | Emsian (Ediacaran ?)          | 94                    | n/a   | Type-1           |
| UD14                                | Tasovice                                  | Medium- to coarse-grained sandstone (c. 85% quartz + quartzite and quartz siltstone clasts; ~5 % plagioclase + orthoclase; 1–2% muscovite, 1% biotite + chlorite), matrix (5 to 10 %) mostly sericitic but carbonate sparite observed locally                                                              | 48.822<br>6  | 16.154<br>9 | Emsian-Eifelian (Ediacaran ?) | 111                   | n/a   | Type-1           |
| UD56                                | Lažánky, V zrcadlech, creek               | Very coarse-grained greywacke to subarkose with predominant quartz grains (40 - 50 %), feldspar (5–15 %) and lithic fraction (5 %; granites, feldspathic rocks, gneiss). Matrix (up to ~40 %) is argillitic-sericitic and muscovitic-sericitic with strongly preferred orientation defined by deformation. | 49.344<br>1  | 16.694<br>6 | Givetian                      | 130                   | n/a   | Type-1           |
| UD54                                | Hády upper bench, W corner                | Matrix-supported petromict conglomerate to breccia. Matrix is coarse grained lithic arkose composed of granitoids, quartzites, sandstones, quartz and feldspar grains, slate, limestone and volcanic clasts.                                                                                               | 49.221<br>8  | 16.667<br>0 | Frasnian                      | 108                   | n/a   | Type-1           |
| UD53                                | Hády centre of lower quarry bench         | Argillaceous radiolarian wackestone. Calcified radiolarian tests are scattered in the matrix composed of coarse microsparite (calcite and dolomite) overlocking and intergrowing clay minerals. Swarms of clay and organic matter rich dissolution seams.                                                  | 49.219<br>4  | 16.671<br>0 | Famennian                     | 87                    | 18    | Type-1           |
| <i>Ludmírov Facies Domain</i>       |                                           |                                                                                                                                                                                                                                                                                                            |              |             |                               |                       |       |                  |
| UD59                                | Jalovčí, block on ridge                   | Medium to coarse grained greywacke to quartz sandstone composed of 70 to 90 % of quartz and quartzite grains, and 30 to 10 % partly silicified matrix with predominant silt sized quartz and minor sericite. Muscovite is rare.                                                                            | 49.643<br>5  | 16.890<br>7 | Emsian-Eifelian               | 119                   | 15    | Type-1           |
| <i>Drahany Facies Domain</i>        |                                           |                                                                                                                                                                                                                                                                                                            |              |             |                               |                       |       |                  |
| UD58                                | Šubiřov, right creek of the Nectava river | Coarse to very coarse grained subarkose (80 to 85 % quartz, 15 to 20 % feldspars) with minor muscovite (<2 %); matrix-poor (sericitic matrix <2 %).                                                                                                                                                        | 49.634<br>0  | 16.821<br>8 | Pragian-Emsian                | 95                    | n/a   | Type-1           |
| UD60                                | Liškovy skalky                            | Medium grained calcareous sandstone to sandy limestone. Quartz grains (70-30 %) and calciclasts/bioclasts (?) in calcitic coarse grained sparite. Muscovite and plagioclase are rare.                                                                                                                      | 49.640<br>7  | 16.834<br>6 | Pragian-Emsian                | 118                   | 15    | Type-1           |
| <i>Vrbno Facies Domain</i>          |                                           |                                                                                                                                                                                                                                                                                                            |              |             |                               |                       |       |                  |
| UD17                                | Suchý Vrch                                | Supermature, very fine-grained quartzite with densely fitted quartz grains and minor muscovite admixture (muscovite grains coarser than quartz)                                                                                                                                                            | 50.154<br>5  | 17.345<br>3 | Pragian                       | 122                   | n/a   | Type-2           |
| 24VG3                               | Scree slope E. of Stará hora              | Medium-grained super mature quartzite (>90 % Qtz) with minor interstitial muscovite and opaque minerals.                                                                                                                                                                                                   | 50.189<br>4  | 17.320<br>1 | Pragian                       | 163                   | 30    | Type-2           |
| 24VG2 A                             | Bedrock foundations of Drakov castle      | Chlorite + muscovite dominated phyllite strongly affected by shearing and isoclinal folding with crenulation cleavages, separated by mm- to cm-scale quartz-rich bands                                                                                                                                     | 50.183<br>8  | 17.353<br>5 | Pragian-Emsian                | 163                   | 18    | Type-2           |



|                             |                                                |                                                                                                                                                                                                        |             |             |                       |     |     |        |
|-----------------------------|------------------------------------------------|--------------------------------------------------------------------------------------------------------------------------------------------------------------------------------------------------------|-------------|-------------|-----------------------|-----|-----|--------|
| 24VG2<br>B                  | Bedrock foundations of Drakov castle           | Fine to medium-grained mature quartzite (c. 75 % Qtz) with bands of strongly aligned chlorite and muscovite. Minor feldspar component (5 to 10 %) mostly represented by albite.                        | 50.183<br>8 | 17.353<br>5 | Pragian-Emsian        | 162 | 27  | Type-2 |
| 24VG1                       | Small quarry above ski areál Příčná Zlaté Hory | Super mature fine to medium-grained quartzite (>90 % Qtz), with minor interstitial muscovite and opaque minerals.                                                                                      | 50.244<br>4 | 17.387<br>8 | Givetian              | 167 | 29  | Type-2 |
| <i>Tišnov Facies Domain</i> |                                                |                                                                                                                                                                                                        |             |             |                       |     |     |        |
| UD52                        | Předklášteří                                   | Supermature coarse-grained sandstone with sericitic-quartzose matrix (1–5 %). Quartz grains predominate (> 90 %), infrequent are quartzite clasts, and muscovite, plagioclase and orthoclase are rare. | 49.343<br>5 | 16.398<br>0 | Emsian                | 142 | 15  | Type-1 |
| <i>Branná Facies Domain</i> |                                                |                                                                                                                                                                                                        |             |             |                       |     |     |        |
| 24VG4<br>A                  | Rock face NE from Bílý kámen                   | Medium-grained mature quartzite (c.70 % Qtz) with moderate feldspar (c. 15 %) and minor interstitial chlorite and muscovite (< 10 %) components.                                                       | 49.873<br>5 | 16.980<br>1 | Pragian (Ediacaran ?) | 162 | 38  | Type-1 |
| 24BR1                       | Railway cutting S. of Ostružná village         | Qtz-rich (c.50 %) phyllite, with strongly aligned muscovite and chlorite showing isoclinal folding with crenulation cleavages, minor feldspar component (c. 10 %) is mostly albite.                    | 50.174<br>0 | 17.043<br>5 | Pragian (Ediacaran ?) | 34  | n/a | Type-1 |
| 24BR2                       | Railway cutting S. of Ostružná village         | Medium- to coarse-grained mature quartzite (c.85 % Qtz) with minor interstitial muscovite and small (c.5 % feldspar) component.                                                                        | 50.174<br>0 | 17.043<br>5 | Pragian (Ediacaran ?) | 162 | 36  | Type-1 |
| 24VG4<br>B                  | Rock face E from Bílý kámen                    | Meta-arkose with approximately even amounts of quartz and feldspar (c. 40 % of each). Minor interstitial muscovite and chlorite define weak foliation.                                                 | 49.871<br>6 | 16.984<br>4 | Givetian              | 163 | n/a | Type-1 |
| UD62                        | Ostrá hora, rocky ridge                        | Coarse grained supermature quartzite (>90 % Qtz). Coarsely recrystallized and silicified groundmass parts interfinger with muscovite and muscovite-sericite.                                           | 49.839<br>6 | 17.025<br>1 | Givetian              | 104 | n/a | Type-1 |

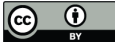

255

260

265

unzoned??

"datum" is singular;  
 "data" are plural

The mounted zircon grains were imaged by both back-scattered electron (BSE) and cathodoluminescence (CL) techniques using a scanning electron microscope at the Czech Geological Survey in Prague. These images guided the localization of U–Pb isotopic spots within coherent zircon domains larger than 25 μm in diameter. Lu–Hf isotopic spots (45 μm in diameter) have been located within significant zircon domains that yielded concordant U–Pb isotopic ages. A selection of CL images from each sample are provided in Fig. 4. The U–Pb isotopic data was acquired at the University of Bergen, Norway (UD14 and UD17 only) and at the laboratories of the Czech Geological Survey (all remaining samples). The Lu–Hf isotopic data was acquired at the laboratories of the Czech Geological Survey. The methodology and analytical conditions largely follow that reported in Soejono et al. (2022) and are detailed in Section S1. Complete reporting of isotopic data including that of analytical standards is given in Section S2.

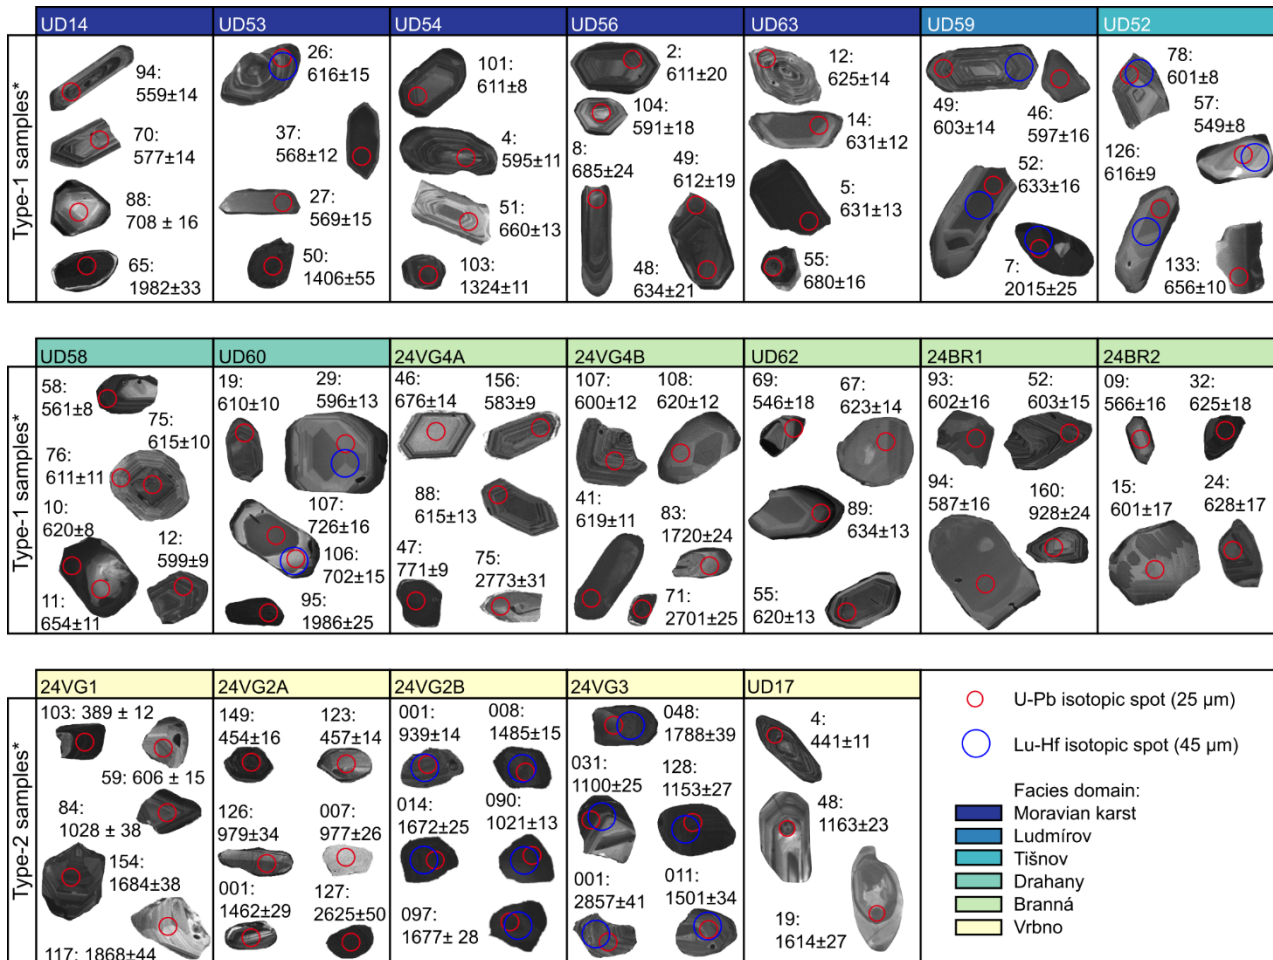

Figure 4: Cathodoluminescence images of representative zircons from each sample. All zircons in the figure gave concordant (concordia distance <5) ages and the given age is the iterative single-grain concordia age with 2s uncertainty. \*classification into Type-1 and Type-2 samples according to results section.

Ma??



## 4 Results

270 A total of 2,407 U–Pb isotopic analyses were conducted on the 19 studied samples. Concordant U–Pb ages (n = 2,184) are presented in both this section and Section 5 in the form of a cumulative age distribution plot and kernel density distribution plots. Concordant data are defined as those with a concordia distance <5 (formulation of Vermeesch, 2021) and reported ages are iterative single grain concordia ages in order to avoid problematic changeover in the U–Pb isotopic system.

### 4.1 U–Pb isotopic data

275 The U–Pb isotopic data revealed two internally consistent but highly contrasting datasets, which are graphically depicted in a cumulative age distribution plot (Fig. 5).

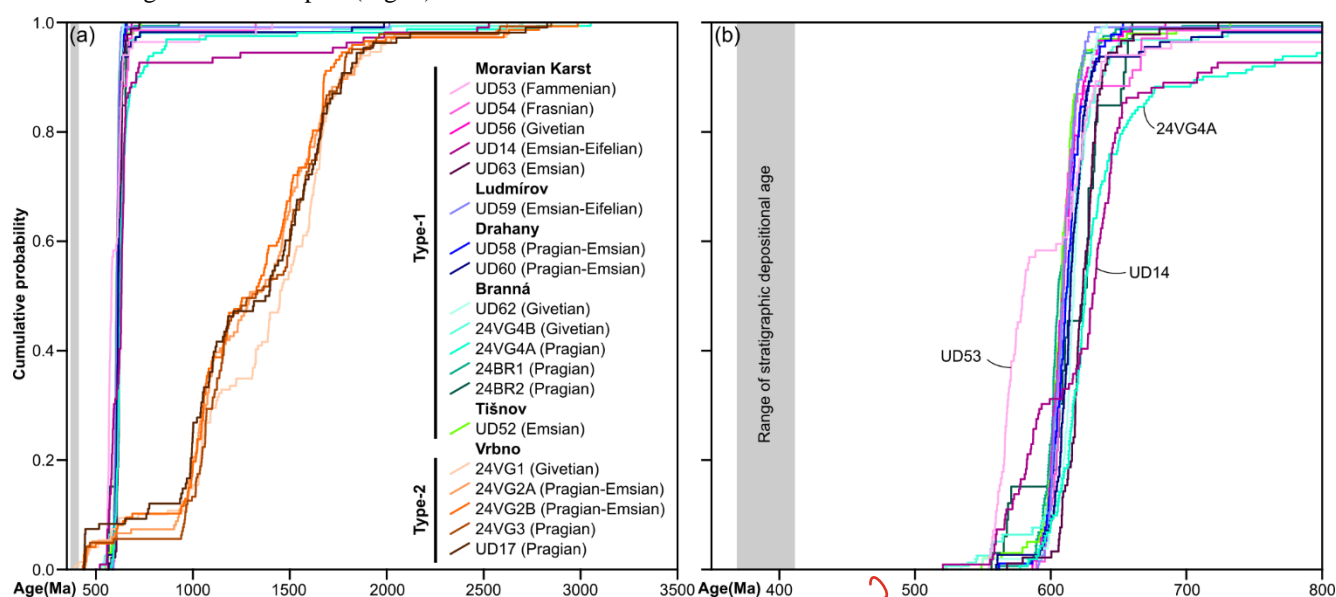

280 **Figure 5: (a) Cumulative age distribution plot of the studied samples of supposedly Devonian clastics highlighting the difference in the Type-1 and Type-2 age distributions. (b) Close-up view of the distribution of late Neoproterozoic zircons in the Type-1 group, selected samples with slightly non-standard distributions are highlighted.**

Fourteen samples display nearly unimodal age distributions dominated by late Neoproterozoic zircons. Fewer than 3 % of concordant analyses yielded Tonian or older ages (>720 Ma), and none are younger than the Terreneuvian Series of the Cambrian (<521 Ma). These are hereafter referred to as Type-1 samples. This spectral signature occurs throughout Brunia and across all facies domains, except in the restricted Vrbno Facies Domain defined here.

285 Type-1 samples show minimal variation, with most ages clustering between 590–620 Ma. The main exception is the youngest sample, UD53 (Famennian, Moravian Karst), which is dominated by a 550–560 Ma population and a subordinate 590–620 Ma group. The 550–560 Ma population also appears, to a lesser extent, in UD14 (Moravian Karst), 24BR2, and 24VG4B (both Branná Group). **occurs**



population

290 Samples UD14 and 24VG4A (Branná Group) stand out for a significant Cryogenian component (>20%), which is also present in smaller amounts across the other Type-1 samples. Additionally, 24VG4A includes a unique subset (n = 10) of Tonian ages, forming minor peaks at ~765 Ma and ~850 Ma. Mesoproterozoic and older grains are rare, occurring in just 7 of the 14 samples and totalling 23 analyses, with reproduced ages at ~1060, 1330, 1730, 2000, 2490, and 2740 Ma (Fig. 6).

295 The remaining five samples (Type-2) exhibit multimodal age distributions, with the majority of data yielding late Paleoproterozoic to early Neoproterozoic ages (Fig. 6). A total of 89% of all concordant data points fall within the 2100–900 Ma range. These Type-2 samples are restricted to the Vrbno Facies Domain, specifically in the northern part of the Silesian Domain of Brunia.

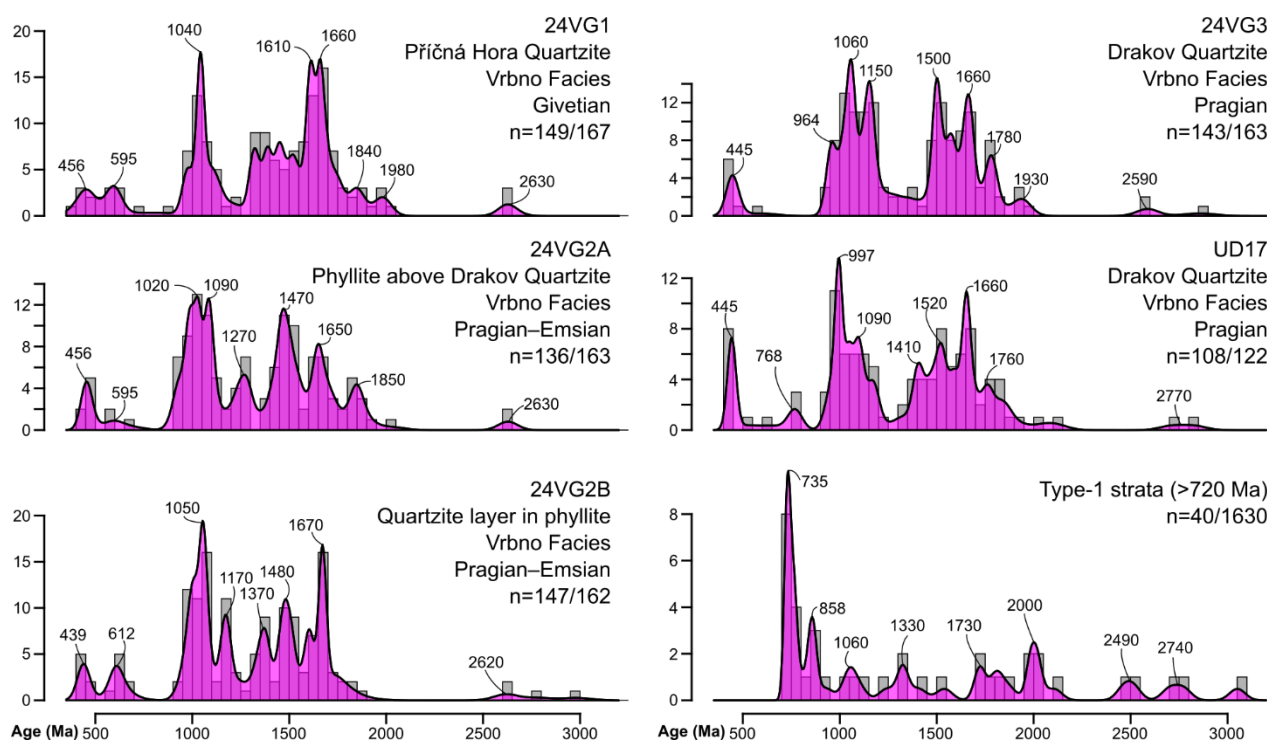

**Figure 6: Kernel Density Estimates and histograms for the Type-2 samples and compiled >720 Ma zircons in the Type-1 strata for comparison.**

300 The oldest zircons in the Type-2 samples are Mesoarchean, with a relatively consistent Neoproterozoic population (~2600 Ma) present in all samples except UD17. A distinct age gap follows, with the next oldest grains appearing around 2100 Ma. Pronounced age maxima occur in the late Orosirian and early Statherian, followed by a widespread late Statherian peak (~1670–1650 Ma) present in all samples. Similar, consistent peaks are observed during the Calymnian (1600–1400 Ma), while Ectasian (1400–1200 Ma) zircons are generally sparse, except for discrete maxima in sample 24VG2B (~1370 Ma) and 24VG2A (~1270 Ma). All samples contain abundant Stenian to early Tonian zircons (1200–900 Ma), with distinct peaks between 1170 and 960 Ma.

I am not sure these names are needed, age range is sufficient



Only 20 of 678 concordant analyses in Type-2 samples fall within the Terreneuvian to end-Cryogenian range that dominates the Type-1 samples. Type-2 samples also include a notable Paleozoic component (n = 38), mainly spanning the Late Ordovician to the Llandovery Epoch of the Silurian (458–433 Ma). Only one concordant grain, from the Givetian Příčná Hora Quartzite (24VG1), yielded a Devonian age (389 ± 12 Ma) approximating the inferred stratigraphic age.

#### 4.2 Lu-Hf isotopic data

Zircons from ten representative samples were further studied using Lu–Hf isotopic analyses. These samples cover a diverse range of facies domains and stratigraphic ages. In total, 241 spot analyses were performed. Notably, the Type-2 samples are characterized by small (20–50 μm), often fractured zircons, which limited the available material for the 45 μm laser spot size required in Lu–Hf isotopic analysis.

In each of the Type-1 samples, late Neoproterozoic zircons predominantly yield positive  $\epsilon_{\text{Hf}(t)}$  values, mostly within the range of +4 to +10 (Fig. 7). The main exception is sample 24VG4A, which contains a cluster of six analyses with  $\epsilon_{\text{Hf}(t)}$  values between -7.5 and -10. However, the majority of data from this sample (n = 22) share positive  $\epsilon_{\text{Hf}(t)}$  values consistent with other type-1 samples. Additionally, single Late Neoproterozoic zircons in both 24BR1 and UD53 show overlapping negative  $\epsilon_{\text{Hf}(t)}$  values with the outliers from 24VG4A. Sample UD53 is notable for its higher abundance of late Ediacaran (560–550 Ma) zircons compared to other samples, but these late Ediacaran zircons exhibit a similar range of positive  $\epsilon_{\text{Hf}(t)}$  values as earlier Ediacaran zircons.

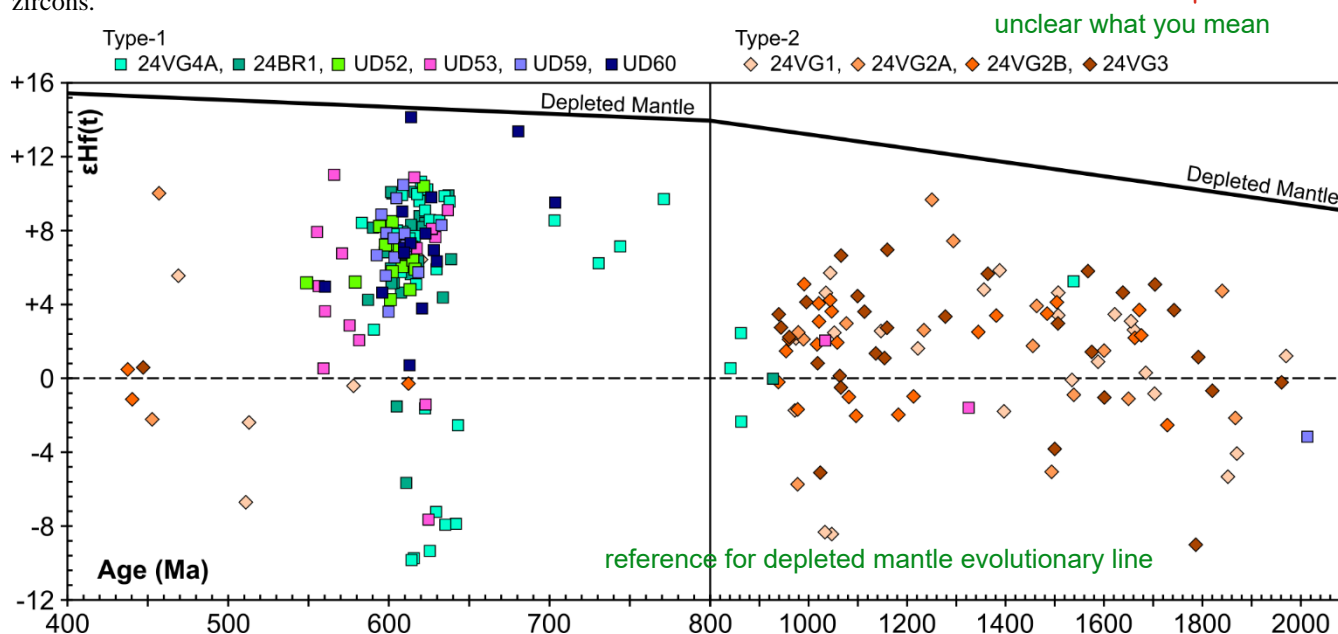

Figure 7: Age versus  $\epsilon_{\text{Hf}(t)}$  plot for the studied zircons from the Brunia Devonian clastics.

Cryogenian zircons in sample UD60 exhibit highly positive  $\epsilon_{\text{Hf}(t)}$  values (+9.3 and +13.1), as do Cryogenian and Late Tonian zircons (n = 4) in 24VG4A (+6 to +9.5). In contrast, mid-Tonian zircons in 24VG4A (~850 Ma, n=3) plot on either side of the

Chondritic Uniform Reservoir (CHUR) line, while a single early Tonian (~930 Ma) zircon in 24BR1 has a similar  $\epsilon_{\text{Hf}(t)}$  value of -0.2. Older scattered data points from the Type-1 samples cluster near and on both sides of the CHUR line.

In the Type-2 samples, approximately 70 % of zircons aged between 2000 and 900 Ma yield positive  $\epsilon_{\text{Hf}(t)}$  values within a range of -8.9 to +9.6. The distribution forms a slight crescent shape, with the oldest and youngest zircons showing the most negative  $\epsilon_{\text{Hf}(t)}$  values, and the highest positive values observed in intermediate-aged zircons (1300–1250 Ma).

Two Neoproterozoic data points (not shown in Fig. 7) yield CHUR-like  $\epsilon_{\text{Hf}(t)}$  values (-0.2 and -0.5). Among three late Neoproterozoic zircons, one has a positive  $\epsilon_{\text{Hf}(t)}$  value (+6.1) similar to the Type-1 strata, while the other two show CHUR-like values (-0.6 and -0.7). Two Cambrian (~510 Ma) zircons display negative  $\epsilon_{\text{Hf}(t)}$  values (-2.7 and -7), two Middle Ordovician zircons exhibit positive values (+5.2 and +9.7), and four Late Ordovician to Silurian zircons present CHUR-like values ranging from -2.5 to +0.3.

## 5. Discussion

### 5.1 Sources and significance of Type-1 zircon spectra

The Type-1 zircon spectra display a nearly unimodal population centred in the late Neoproterozoic, with Hf-in-zircon isotopic compositions clustered at positive  $\epsilon_{\text{Hf}(t)}$  values. While a few older zircons appear scattered across the early Neoproterozoic, Mesoproterozoic, Paleoproterozoic, and Archean, these populations are statistically insignificant. This distribution suggests that the zircon source is relatively local, with limited mixing from external sources.

The late Neoproterozoic zircon ages correspond well with granitoids and their metamorphosed equivalents widespread in the Slavkov and Thaya domains, as well as the Moravian and Silesian nappes. However, the narrow age range and consistently positive  $\epsilon_{\text{Hf}(t)}$  values strongly point to the Slavkov Domain and Desná Dome (par-autochthonous part of Silesian nappes) as the most plausible sources. This is supported by the juvenile isotopic signatures of (meta-)granitoids in these areas ( $^{87}\text{Sr}/^{86}\text{Sr}_{(580\text{Ma})} = 0.703\text{--}0.705$ ;  $\epsilon_{\text{Nd}(580\text{Ma})} = -1$  to +4; Finger et al., 2000; Hanžl et al., 2007; Krmíčková et al., 2025).

In contrast, granitoids of the Thaya Terrane show more mature crustal signatures ( $^{87}\text{Sr}/^{86}\text{Sr}_{(580\text{Ma})} = 0.708\text{--}0.712$ ;  $\epsilon_{\text{Nd}(580\text{Ma})} = -1$  to -7; Finger et al., 2000; Soejono et al., 2017), making them less likely sources. Similarly, allochthonous meta-granitoids in the Moravian and Silesian nappes exhibit mature crustal signatures ( $^{87}\text{Sr}/^{86}\text{Sr}_{(580\text{Ma})} \approx 0.7101$ ;  $\epsilon_{\text{Nd}(580\text{Ma})} = -5$  to -11) and contain significant xenocrystic Mesoproterozoic zircon components (Hegner and Kröner, 2000; Friedl et al., 2004; Soejono et al., 2017), further excluding them as contributors.

#### 5.1.1 Discriminating Ediacaran and Devonian clastics

Surface clastic strata of the pre-Variscan Brunia units have traditionally been assigned to Devonian basal clastics, based on limited faunal evidence and stratigraphic continuity with Devonian limestones (Zukalová and Chlupáč, 1982). However, the discovery of marine Ediacaran to early Cambrian acritarchs in borehole-derived clastics suggests some may be older (Mikuláš et al., 2008; Vavrdová and Dašková, 2011). Recent detrital zircon studies have revisited this issue. Jastrzębski et al. (2021),



reference

strata previously

Soejono et al. (2022), and Timmerman et al. (2023) presented zircon age spectra from Brunia, including samples from confirmed Ediacaran units and clastics previously mapped as Devonian. Jastrzębski et al. (2021) studied samples from the Silesian nappes, while Timmerman et al. (2023) focused on the Moravian Karst Facies Domain. In both cases, mapped Devonian clastics were reinterpreted as Ediacaran based on the absence of Paleozoic zircons and similarity to Ediacaran age spectra also citing earlier findings by Košler et al. (2014), who reported Cambrian zircons from a single sample. Timmerman et al. (2023) further supported their interpretation with ash layers dated to ~550 Ma, though these were limited to basal part of the clastic succession in areas east of the Slavkov granitoids.

360  
365 Our new data contest these reinterpetations. Paleontologically constrained Devonian clastics and interbeds within Devonian limestones consistently show unimodal zircon age spectra peaking in the late Ediacaran. To assess the reliability of distinguishing Ediacaran–Cambrian from Devonian units via zircon geochronology, we compiled and compared all published Brunia detrital zircon datasets (Fig. 8).

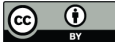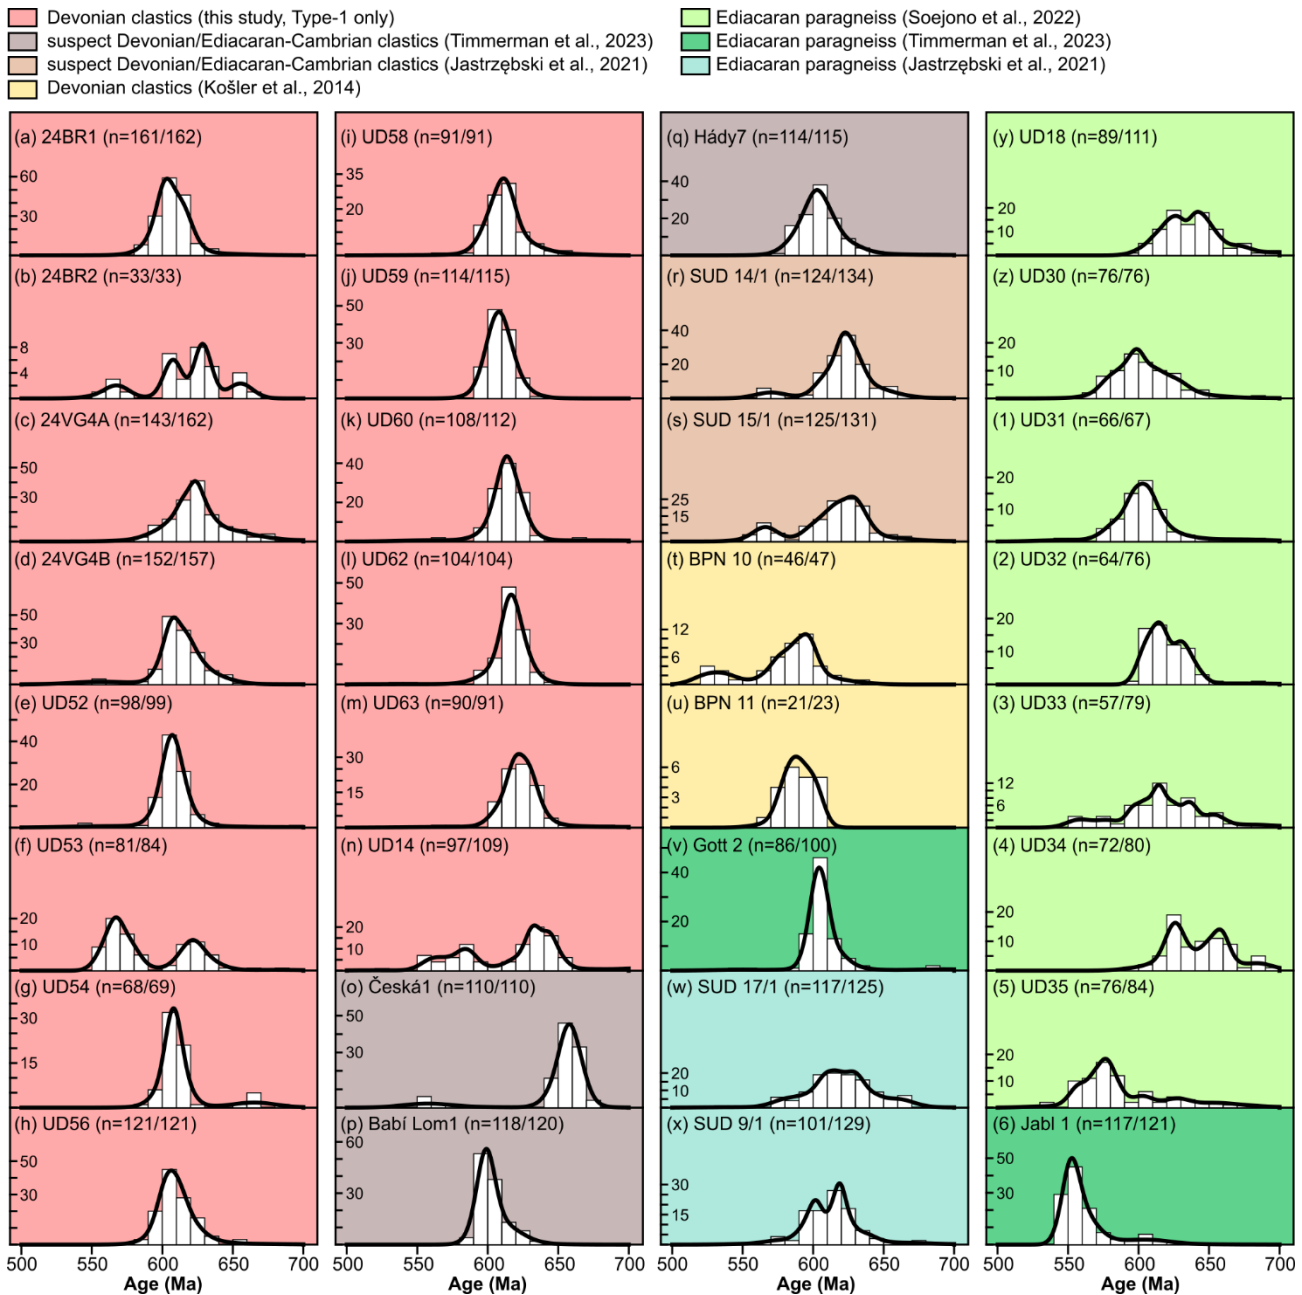

370 **Figure 8: Compiled detrital zircon data in the 700–500 Ma range from Brunia strata that exhibit a near unimodal late Neoproterozoic age peak. N value represents the number of concordant (concordia distance <5) zircons in the 700–500 Ma range versus total number of concordant grains. The data used in the construction of this figure was compiled in Collett (2025).**

The compiled data clearly show that both Ediacaran and Devonian strata are characterized by nearly identical unimodal zircon age spectra, with peaks in the late Neoproterozoic. While true Ediacaran samples typically exhibit broader age distributions and a slightly higher proportion of older zircons, these differences are minor and insufficient for reliable stratigraphic

375



380 differentiation. Some variation in peak ages exists. For example, sample Českál (Timmerman et al., 2023) peaks near ~650 Ma, likely reflecting proximity to ~650 Ma meta-igneous rocks (Hanžl et al., 2019). Sample Jabl1 shows a distinct ~550 Ma peak, but its interpretation is uncertain, as Timmerman et al. (2023) did not examine hand specimens or thin sections. But, otherwise it appears the U–Pb detrital zircon isotopic data alone ~~is not able to~~ <sup>cannot</sup> discriminate between Ediacaran–early Cambrian and Devonian strata. <sup>can be discerned from</sup>

Nonetheless, there are potential subtle differences from Hf-in-zircon isotopic data (Fig. 9a). Ediacaran strata (Soejono et al., 2022) include ~600 Ma zircons with both positive and slightly negative (centred around  $-2$ )  $\epsilon_{\text{Hf}(t)}$  values, while Devonian strata analyzed here generally lack this slightly negative component. <sup>In addition,</sup> The group of c.600 Ma zircons with even more negative  $\epsilon_{\text{Hf}(t)}$  values in sample 24VG4A are ~~also~~ not represented in the data from Ediacaran strata. Tentatively, the former finding may indicate that both Slavkov and Thaya terrane granitoids (or isotopically similar sources) were exposed to erosion during the Ediacaran, with only Slavkov sources contributing detritus during the Devonian. However, further Hf isotope data are needed to test this hypothesis.

385

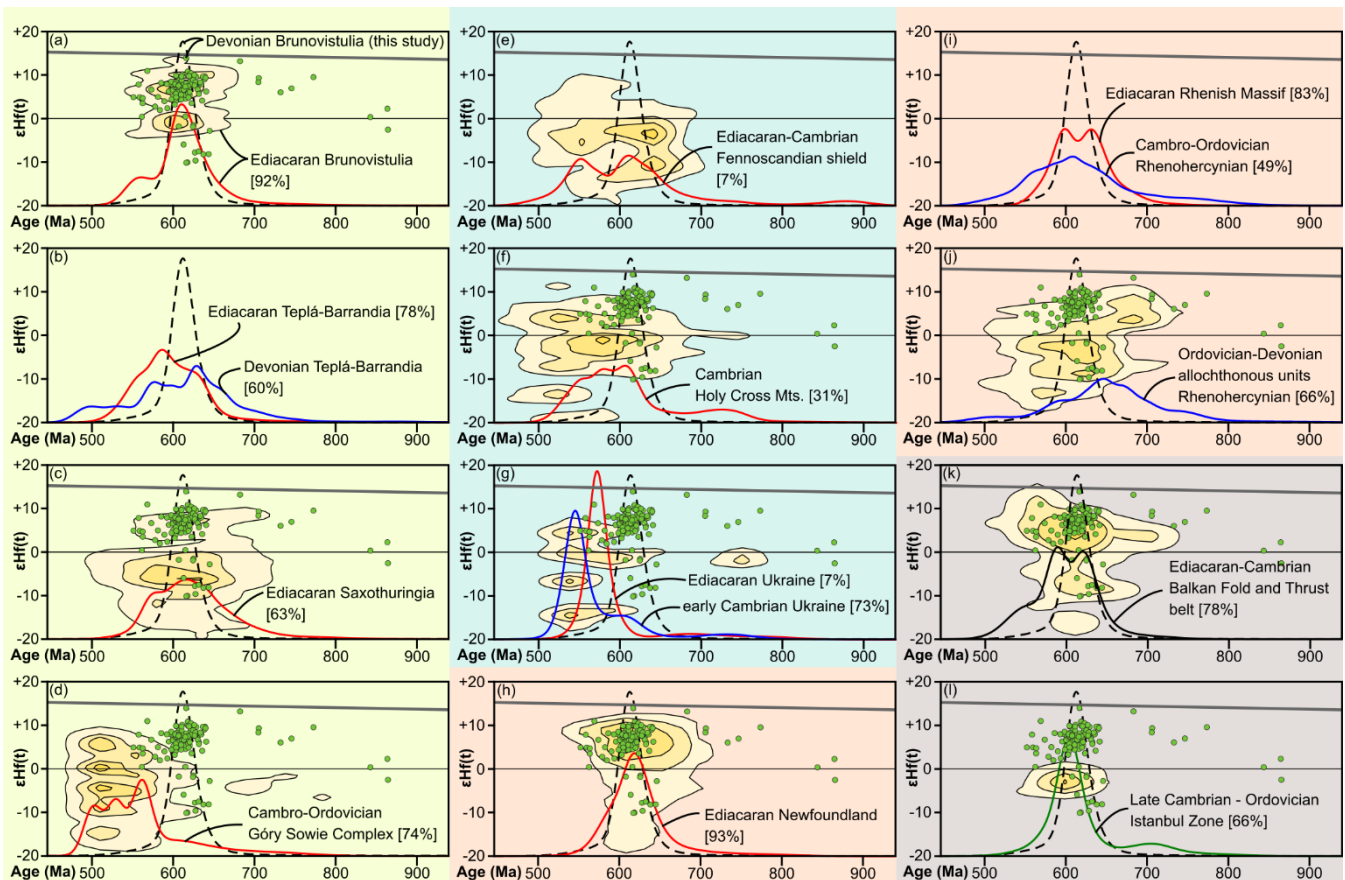

390 **Figure 9: Compiled U–Pb and Lu–Hf isotopic data from Neoproterozoic–early Paleozoic zircons in the Bohemian Massif (a–d), SW marginal Baltica (e–g) and Avalonian (h–j) and Far-East Avalonia (k,l) Ediacaran – Devonian strata. Number in parentheses equals the percentage of all concordant zircon analyses in the range 900–485 Ma. Compiled data used to construct this figure are from the detrital zircon database in Collett (2025), a full list of data sources is provided in Section S3.**



## Regional

### 5.1.2 ~~Wider~~ paleogeographic significance

395 With the Type-1 zircon spectra predominantly reflecting erosion of local sources within the Slavkov Domain (or isotopically equivalent units), these data provide limited direct constraints on the Devonian paleogeography of Brunia. Nonetheless, the detrital zircon record offers insights into Neoproterozoic correlations with other terranes, particularly the internal Bohemian Massif, Baltica's SW margin, and Avalonian terranes (see Sect. 1).

Previous studies (e.g., Košler et al., 2014; Soejono et al., 2022) have suggested links between late Neoproterozoic magmatism in Brunia and thick Ediacaran to early Cambrian successions within the internal Bohemian Massif, known for their abundance  
400 of late Neoproterozoic zircons. However, when comparing detrital zircon data from Brunia to other Bohemian Massif strata (Fig. 9b–d), a key distinction arises: Ediacaran to Cambrian strata elsewhere in the Bohemian Massif exhibit more diverse detrital sources, characterized by broader Neoproterozoic age maxima and significant (>20%) contributions of Paleoproterozoic zircons. Where hafnium isotopic data exist; for example, from Ediacaran strata in Saxo-Thuringia (Linnemann et al., 2014, 2018) and Cambro–Ordovician strata of the Góry Sowie Metamorphic Complex (Tabaud et al., 2020),  
405 a wider range of  $\epsilon_{\text{Hf}(t)}$  values is observed, including abundant zircons with negative  $\epsilon_{\text{Hf}(t)}$  signatures. This contrasts with the more restricted and generally positive  $\epsilon_{\text{Hf}(t)}$  values observed in Brunia strata.

These differences suggest that, while Brunia may have contributed some late Neoproterozoic detrital material to Saxo-Thuringia or Teplá-Barrandia, these regions also received detritus from additional sources beyond the Brunia catchment. Consequently, and in contrast to the model proposed by Soejono et al. (2022), if Brunia and the internal Bohemian Massif  
410 domains (Teplá-Barrandia, Saxo-Thuringia) shared a Neoproterozoic relationship, it is more plausible that Brunia occupied an oceanward (fore-arc) position relative to the cratonward (back-arc) position of Teplá-Barrandia and Saxo-Thuringia.

Alternatively, recent U–Pb zircon data from southwestern Baltica indicate a significant input from a source region characterized by late Neoproterozoic primitive magmatism, with Brunia considered one of the more plausible candidates. However, these late Neoproterozoic zircons; identified across a broad region from the Fennoscandian Shield (Sláma, 2016;  
415 Fig. 9e), through the Holy Cross Mountains in Poland (Callegari et al., 2025; Fig. 9f), to the western margin of the Ukrainian Shield (Paszkowski et al., 2021; Fig. 9g), show more diverse sources than those found in either the Ediacaran or Devonian strata of Brunia. In particular, Baltica's marginal strata contain a significant component of latest Ediacaran to Cambrian zircons with varied  $\epsilon_{\text{Hf}(t)}$  signatures notably absent in Brunia strata. The isotopic and age similarities between these zircons and those from the Góry Sowie Metamorphic Complex in the Bohemian Massif (Fig. 9d) led Collett et al. (2022a) to propose a  
420 paleogeographic link between these regions.

Recent chronological and isotopic work on the Neoproterozoic Brunia basement has led to discussion on the similarity between arc magmatism in Brunia and West Avalonia (e.g. Krmíčková et al., 2025). This correlation is re-emphasized by comparison of our detrital zircon data with both U–Pb and Lu–Hf detrital zircon data from late Neoproterozoic strata of the Avalon Peninsula, Newfoundland (e.g., Beranek et al., 2023; Gómez et al., 2025). The West Avalonia late Neoproterozoic strata exhibit



425 strikingly similar detrital zircon spectra to Brunia's, with over 90 % of all zircons in the 900–485 Ma range and dominance of positive  $\varepsilon_{\text{Hf}(t)}$  values within these zircons (Fig. 9h).

✓ Within East Avalonian terranes in Central Europe Ediacaran strata are rare, but detrital zircon data from a single occurrence in the Rhenish Massif exhibit a concentrated ~600 Ma maxima (Fig. 9i) resembling the data from Brunia. However, Cambrian–Ordovician strata differ in that they display a broader range of Neoproterozoic ages and considerably greater proportion of  
430 older than Neoproterozoic zircons. Autochthonous Devonian strata from the Rhenohercynian zone yield spectra comparable to Brunia's Type-2 Devonian strata and are discussed in the next section (5.2.). No Hf-in-zircon isotopic data ~~is~~ available for autochthonous Rhenohercynian strata. Data ~~is~~ <sup>are</sup> available from allochthonous Ordovician–Devonian units (in Mende et al., 2019), however, these reveal isotopic diversity similar to Saxo-Thuringia (Fig. 9j), suggesting Brunia is unlikely to be a source for these strata.

435 Avalonian-associated terranes are thought to also continue SE from Brunia around the Moesian Platform and in the Istanbul Zone in NW Turkey. Recent U–Pb and Lu–Hf zircon isotopic data (in Žák et al., 2026) from the Balkan Fold and Thrust Belt (southern margin of the Moesian Platform) reveal similar c.600 Ma maxima and positive  $\varepsilon_{\text{Hf}(t)}$  values to those observed in Brunia (Fig. 9k). In the Dobrogea region (north-eastern part of the Moesian Platform) late Neoproterozoic–early Cambrian turbidites with ~600 Ma maxima are also present, but these also contain significant proportions (>75 %) of older detrital  
440 components (not depicted in Fig. 9). Nonetheless, some Paleozoic strata with unimodal ~600 Ma maxima have also been identified in boreholes in this region (e.g., GM-087 in Balintoni and Balica, 2016), though the stratigraphic age of this sample is poorly constrained. In the Istanbul Zone, late Cambrian–Ordovician strata also show ~600 Ma maxima, but Hf isotopic data (in Yilmazer et al., 2025) cluster near slightly negative  $\varepsilon_{\text{Hf}(t)}$  values (Fig. 9l), contrasting with the positive values in the Brunia Devonian strata. Nonetheless, these data overlap with the slightly negative  $\varepsilon_{\text{Hf}(t)}$  values in Brunia's Ediacaran strata, which  
445 ~~may~~ <sup>s</sup> suggest an isotopic equivalent of the Thaya Terrane was exposed near the Istanbul Zone in the early Paleozoic.

Overall, these comparisons support Brunia as a segment of the Neoproterozoic Avalonian arc, fragments of which are today scattered along Baltica's southwestern margin. While Avalonia's Neoproterozoic provenance is debated (Baltica vs. Amazonian Gondwana affinity; see Murphy, 2023 or Beranek et al., 2023), its Paleozoic drift from Gondwana and accretion to Baltica/Laurentia are better constrained. Thus, if there was a Neoproterozoic link between Brunia and West Avalonia this  
450 was likely already broken by the early Cambrian since faunal and paleomagnetic data suggest that Brunia was already accreted to Baltica by this time (Belka et al., 2002; Nawrocki et al., 2004, 2021). Nonetheless, it is important to highlight that Brunia was probably not the primary source of late Neoproterozoic and early Cambrian detrital zircons found in Baltica's Cambrian strata as previously suggested in Collett et al. (2022a).

Unclear from this text which side of the fence Collett et al 2022 was on. This text could be interpreted either way



It always astonishes me that we spend so much time and money to get precise ages in Ma, only to bin them in imprecise stratigraphic units. Lessons from the evolution of the geologic timescale tell us that the "age" of the early Ediacaran has changed over time. Give geochron ages in Ma!!!!!!

## 5.2 Sources and significance of Type-2 zircon spectra

### 455 5.2.1 An internal Brunia-derived source?

The Type-2 zircon spectra are dominated by zircons with isotopic ages between 1800 and 900 Ma, with minor contributions of Neoproterozoic (~2600 Ma), Ediacaran (~600 Ma), and Late Ordovician–Silurian (460–430 Ma) zircons. Strata with similar abundances of late Paleoproterozoic to early Neoproterozoic zircons have previously been documented from Brunia (e.g., Soejono et al., 2022). These include the host rocks of the Thaya Domain granitoids, which must predate the early Ediacaran  
460 emplacement of these granitoids, as well as the Bílý Potok Group of uncertain age, exposed above the Dřínová Thrust in the Moravian Nappes. This <sup>Variscan??</sup> thrust separates the Devonian cover (Tišnov Facies Domain, sample UD52, this study) of the Neoproterozoic basement from the allochthonous Moravian nappes.

Additional samples rich in 1800–900 Ma zircons include a mica-schist from the Velké Vrbno Dome, the westernmost nappe of the Silesian Domain (Jastrzębski et al., 2021), and a paragneiss from the Drosendorf Unit in Lower Austria (Sorger et al.,  
465 2020). While the Drosendorf Unit lies in the hanging wall of the Moldanubian Thrust, Sorger et al. (2020) consider it an underthrust segment of Brunia and notably, it also contains exotic Mesoproterozoic (~1400 Ma) meta-igneous rocks (Lindner et al., 2021). Clasts rich in 1800–900 Ma zircons are also documented by Timmerman et al. (2023) within their Basal Clastics, and similar-aged zircons occur as xenocrysts in Ediacaran meta-igneous rocks, most prominently within the Bíteš orthogneiss (Soejono et al., 2017). Though a minor component, 1800–900 Ma zircons are also present in the Ediacaran strata and in Type-  
470 1 Devonian samples analyzed in this study.

Crucially, the distribution of these 1800–900 Ma zircons is not uniform across all samples, enabling the identification of three distinct provenance signatures. This classification was first proposed by Collett (2025) and is further refined here using Multi-Dimensional Scaling (MDS), a statistical technique that visualizes similarities in age distributions by plotting samples with similar spectra closer together and dissimilar ones further apart (Vermeesch, 2013).

475 In the resulting MDS plot (Fig. 10), the combined >800 Ma components of the Type-1 strata and the Ediacaran strata cluster closely with the Bílý Potok Group (sample UD11) and a clast from Timmerman et al.'s Basal Clastics (Hády-1), collectively referred to as Cluster-1. A second cluster (Cluster-2) includes the host rocks of the Thaya Domain granitoids (UD16 and UD23), the Velké Vrbno Dome sample (SUD42/3), the Drosendorf Unit (DR), xenocrystic components in the Bíteš orthogneiss, and a second clast from Timmerman et al.'s Basal Clastics (Bil-4). Notably, the Type-2 strata analyzed in this  
480 study form a distinct third cluster (Cluster-3), ~~spatially~~ isolated from the other two groups in MDS ~~space~~.

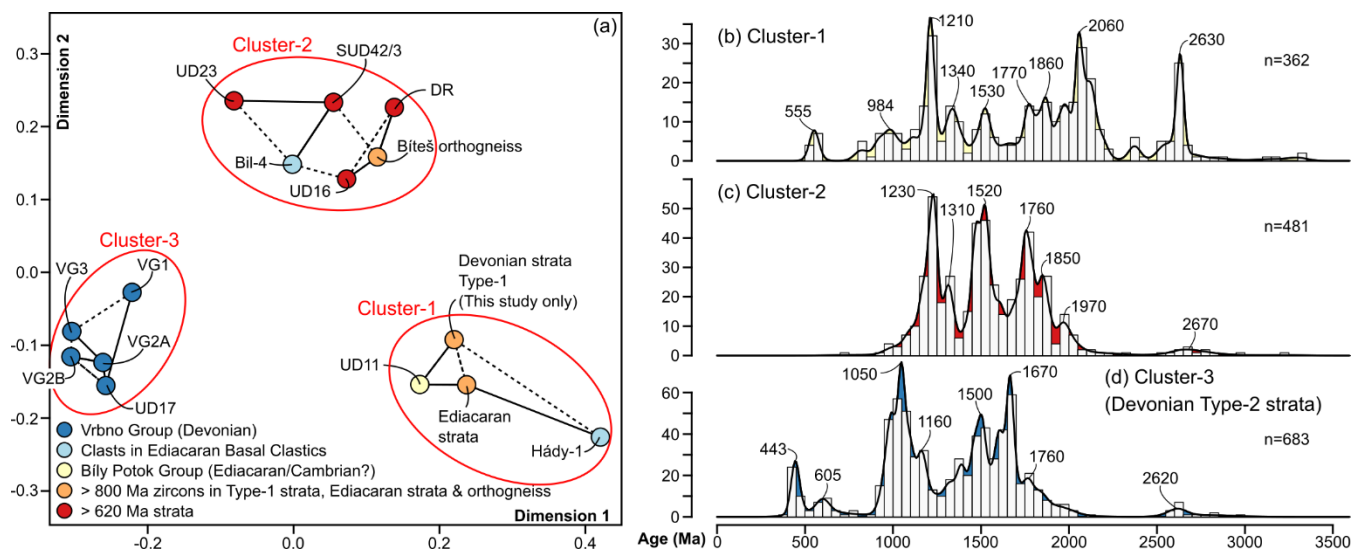

**Figure 10: (a) MDS plot for selected samples from Brunia as well as compiled data from >800 Ma zircons from Type-1 strata, Ediacaran strata and the Bíteš orthogneiss. Note that only >800 Ma zircons are used so as not to overwhelm the statistical comparison with late Neoproterozoic zircons that are minor component in other samples. (b–d) Representative histograms and KDE plots of the data included in each cluster. Data used in construction of this figure was compiled in Collett (2025).**

To further explore intra-cluster differences, KDE plots of the compiled data from each cluster were generated. Cluster-1 (Fig. 10b) is notable for significant peaks at ~2630 and 2060 Ma, features that are relatively minor in the other clusters, as well as a prominent maximum at ~1210 Ma, which coincides with a relative minimum in the Type-2 Devonian strata (Cluster-3). Cluster-2 (Fig. 10c) is characterized by a three-pronged maximum at ~1800, 1500, and 1230 Ma. Notably, the late Mesoproterozoic to early Neoproterozoic zircons that dominate the Type-2 Devonian spectra are largely absent in Cluster-2. Additionally, the significant ~1600 Ma maximum in the Type-2 Devonian strata (Cluster-3, Fig. 10d) corresponds to a general minimum in Cluster-2 samples.

Given the geological context of each sample, ~~it may be speculated~~<sup>we</sup> that Cluster-1 represents the provenance signature of the Slavkov Domain basement, whereas Cluster-2 reflects a provenance signal from the Thaya Domain and the Moravian and Silesian Nappes. Regardless, the distinctiveness of Cluster-3 suggests that our Type-2 zircon spectra do not represent a provenance signal sourced from within Brunia. As such, it is necessary to look beyond Brunia to identify the likely sources of these zircons.

### 5.2.2 Similar sources in the Devonian of the Bohemian Massif

As a first-order comparison, data from the Type-2 strata are evaluated against published zircon data from the Bohemian Massif (Fig. 11). Although data from the crucial Early Devonian time interval ~~remain~~<sup>are</sup> relatively sparse, an increasing number of datasets are now available for Middle to Upper Devonian strata. Samples from Famennian strata of the Bardo Basin and Frasnian(?) strata of the Kłodzko Complex (both from Jastrzębski et al., 2025), as well as Givetian strata from the Prague Basin (Strnad and Mihaljevič, 2005; Drost et al., 2011) and the Sedlčany–Krásná hora roof pendant (Žák and Sláma, 2018);



all belonging to Teplá-Barrandia or its Sudetes equivalent, are highly dissimilar to the Type-2 spectra. These samples also show limited resemblance to the Type-1 spectra, primarily due to either significant Paleozoic zircon components or a greater abundance of Paleoproterozoic zircons.

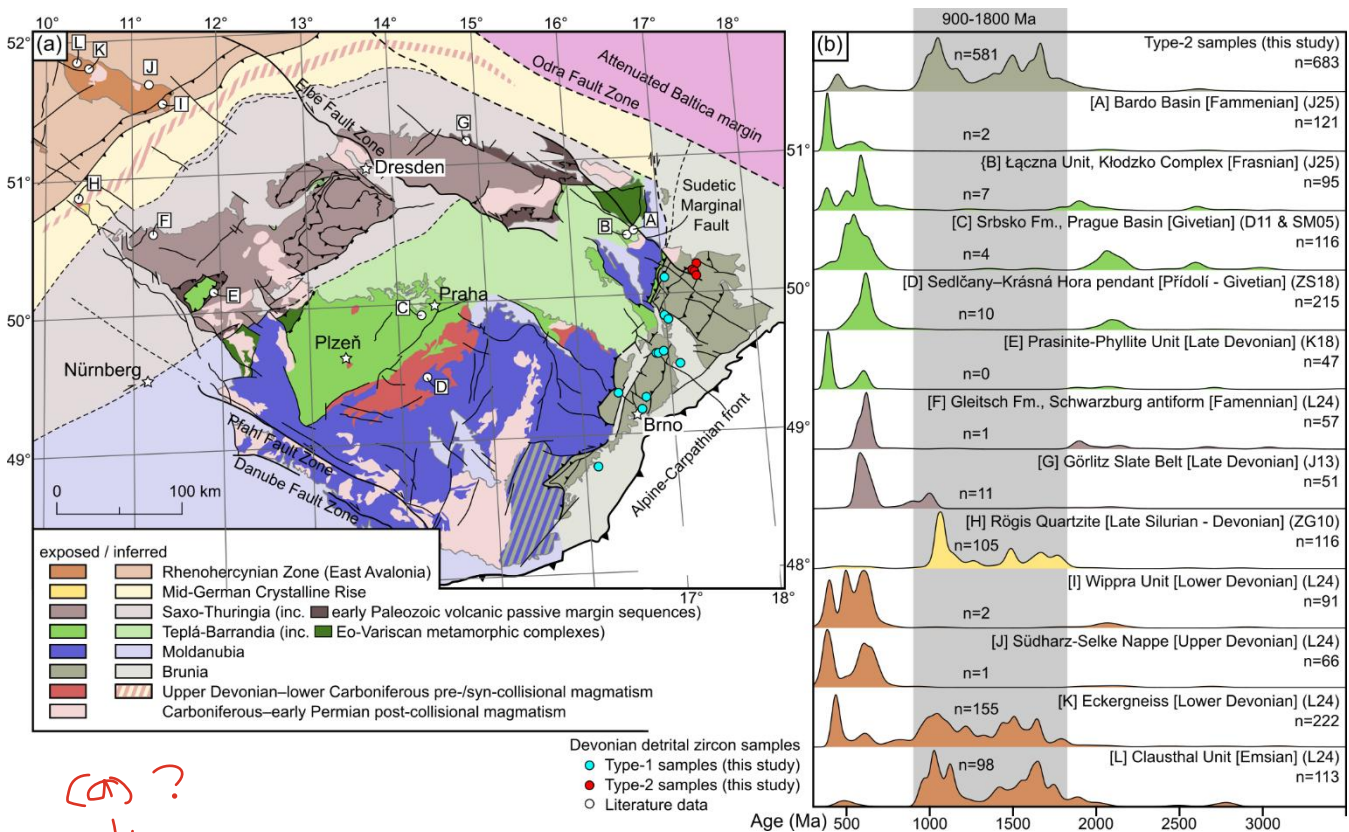

**Figure 11: Comparison of published zircon U–Pb data from Devonian strata in the Bohemian Massif. J25: Jastrzębski et al. (2025); D11: Drost et al. (2011); SM05: Strnad and Mihaljevič (2005); ZS: Žák and Sláma (2018); Koglin et al. (2018); L24: Linnemann et al. (2024); J13: Jähne et al. (2013); ZG10: Zeh and Gerdes (2010).** Shaded area selected because?

Upper Devonian strata of Saxo-Thuringia also show strong dissimilarity to the Type-2 spectra. Although a sample from the Görlitz Slate Belt (Jähne et al., 2013) contains a significant population of Stenian zircons, these are interpreted to differ from the Stenian zircons characteristic of the Type-2 spectra; a point elaborated upon later (see sect. 5.2.4). A more promising correlation is found with the Late Silurian to Lower Devonian Rögis quartzite from the Mid-German Crystalline Rise (Zeh and Gerdes, 2010), which contains similar abundances of 1800–900 Ma zircons and overlapping (though not always proportionally identical) maxima with the Type-2 spectra. The tectonic relationship of the Rögis quartzite and the wider Mid-German Crystalline Rise to Saxo-Thuringia is uncertain but it is generally considered to represent the northern extension of Saxo-Thuringia (e.g. Linnemann et al., 2025).

More robust correlations emerge from recent data published by Linnemann et al. (2024) on Devonian strata in the Harz Mountains, part of the Rhenohercynian Zone north of the Mid-German Crystalline Rise. Here, the upper allochthonous strata



in the south (Wippra Unit, Sudharz Selke Nappe) bear no resemblance to the Type-2 spectra; instead, their zircon age distributions more closely resemble those of Teplá-Barrandia. In contrast, autochthonous Lower Devonian strata in the north (Clausthal Unit) and the lowermost nappe unit (Ecker Gneiss) exhibit an almost identical distribution of 1800–900 Ma zircons to that found in the Type-2 spectra. The main differences lie in the relative abundances of late Neoproterozoic and early Paleozoic zircons, which are more abundant in the Ecker Gneiss and less abundant in the Clausthal Unit compared to the Type-2 spectra.

with?

### 5.2.3 A vast Caledonian fan?

Linnemann et al. (2024) argue that the source of the 1800–900 Ma zircons in the Lower Devonian strata of the Harz Mountains is uplifted Baltica crust within the Caledonian Mountains. Zeh and Gerdes (2010) reached a similar conclusion for the Rögis Quartzite. While both studies equivocate regarding the source of Late Ordovician and Silurian zircons, they are generally assumed to have been derived from local arc magmatism associated with the closure of the Rheic Ocean.

A potential original source for the 1800–900 Ma zircons in Brunia Type-2 strata within Fennoscandia is supported by the close similarity in detrital zircon spectra and Hf-in-zircon isotopic data between Brunia Type-2 samples and Late Ordovician–Silurian strata from the Oslo Rift (Kristofferson et al., 2014; Sláma, 2016). The only age population in the Brunia Type-2 samples not well represented in the Fennoscandian strata are late Neoproterozoic zircons (Fig. 12a), which may indicate some admixture from the Brunia basement in the Type-2 strata. Notably, Ordovician–Silurian zircons of broadly similar isotopic composition are well represented in Fennoscandian strata, suggesting even these may potentially have originated from Fennoscandia.

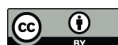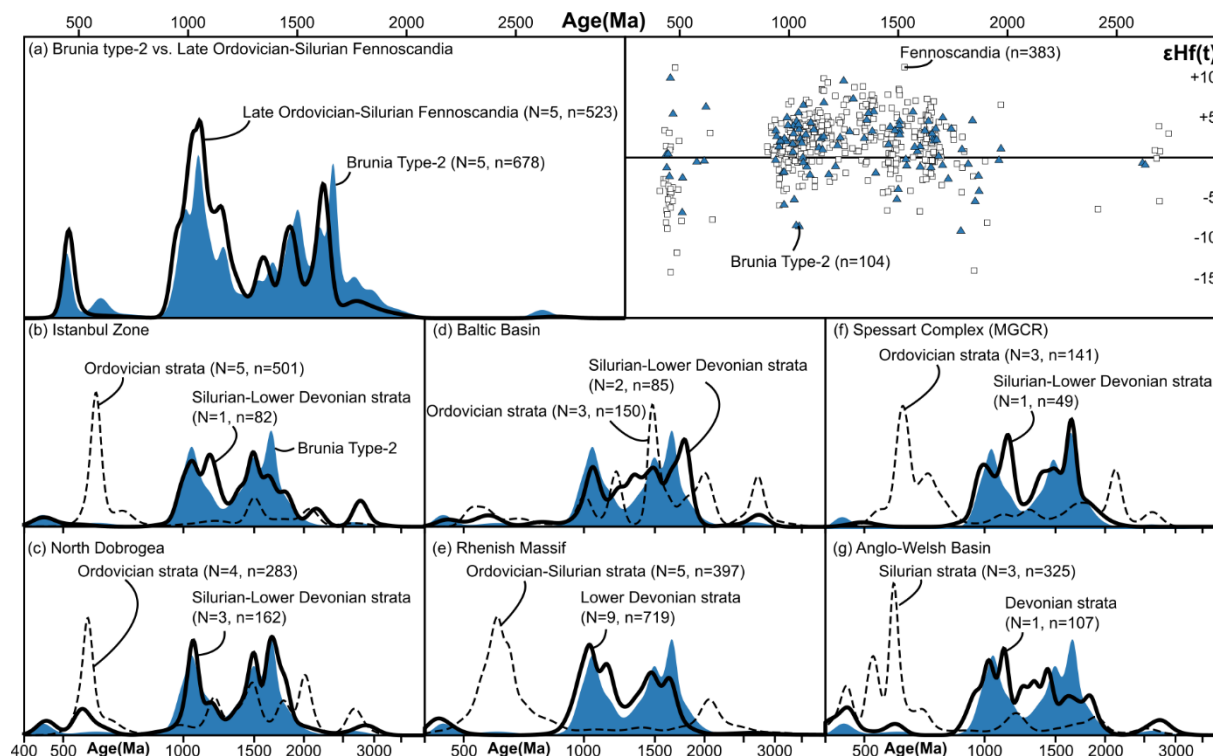

540 **Figure 12: Comparison of Brunia Type-2 detrital zircon data with compiled published data from Late Ordovician–Silurian strata**  
545 **of Fennoscandia (a) as well as Late Silurian – Lower Devonian strata from the (b) Istanbul Zone (Akdoğan et al., 2021), (c) North**  
**Dobrogea region (Beştepe and Cerna formations in Balintoni and Balica, 2016), (d) Baltic Basin in Estonia (Pöldvere et al., 2014),**  
**(e) Rhenish Massif (Eckelmann et al., 2014; Linnemann et al., 2024; Dörr et al., 2025), (f) Spessart Complex in the Mid-German**  
**Crystalline Rise (Kirchner and Albert, 2021), and (g) Anglo-Welsh Basin (Waldron et al., 2025). Data used in the construction of**  
**this figure is compiled in Collett (2025).**

On a broader scale, Upper Silurian to Lower Devonian strata with strikingly similar detrital zircon spectra are documented across diverse terranes in northern and central Europe, extending into Anatolia. Examples depicted in Fig. 12 include the Istanbul Zone (Akdoğan et al., 2021); the North Dobrogea region (Beştepe and Cerna formations in Balintoni and Balica, 2016); the Baltic Basin in Estonia (Pöldvere et al., 2014); the Rhenish Massif (Eckelmann et al., 2014; Dörr et al., 2025); the Spessart Complex of the Mid-German Crystalline Rise (Kirchner and Albert, 2021); and the Anglo-Welsh Basin (Waldron et al., 2025). In each of these regions, the detrital zircon spectra of Upper Silurian–Devonian strata represent a marked shift from those recorded in older units (Fig. 12).

This what? Insert a noun

At an even greater scale, similar spectra are also reported from the Orcadian Basin in NE Scotland (Strachan et al., 2021); Givetian–Famennian strata in East Greenland (Sláma et al., 2011); Silurian–Devonian Sandstones from Svalbard (Beranek et al., 2020; Anfinson et al., 2022) and northern Novaya Zemlya (Lorenz et al., 2013); and the Devonian parts of the Acadian foreland basin in North America (Bradley and Sullivan, 2017; Perrot et al., 2025). This should not be taken to imply a single vast interconnected basin, but rather a network of detrital pathways likely reflecting multiple erosional–depositional cycles



with limited in-transit mixing, and originally derived from a relatively restricted source region; most likely in Baltica-derived crust within the Caledonian Mts. (Fig. 13).

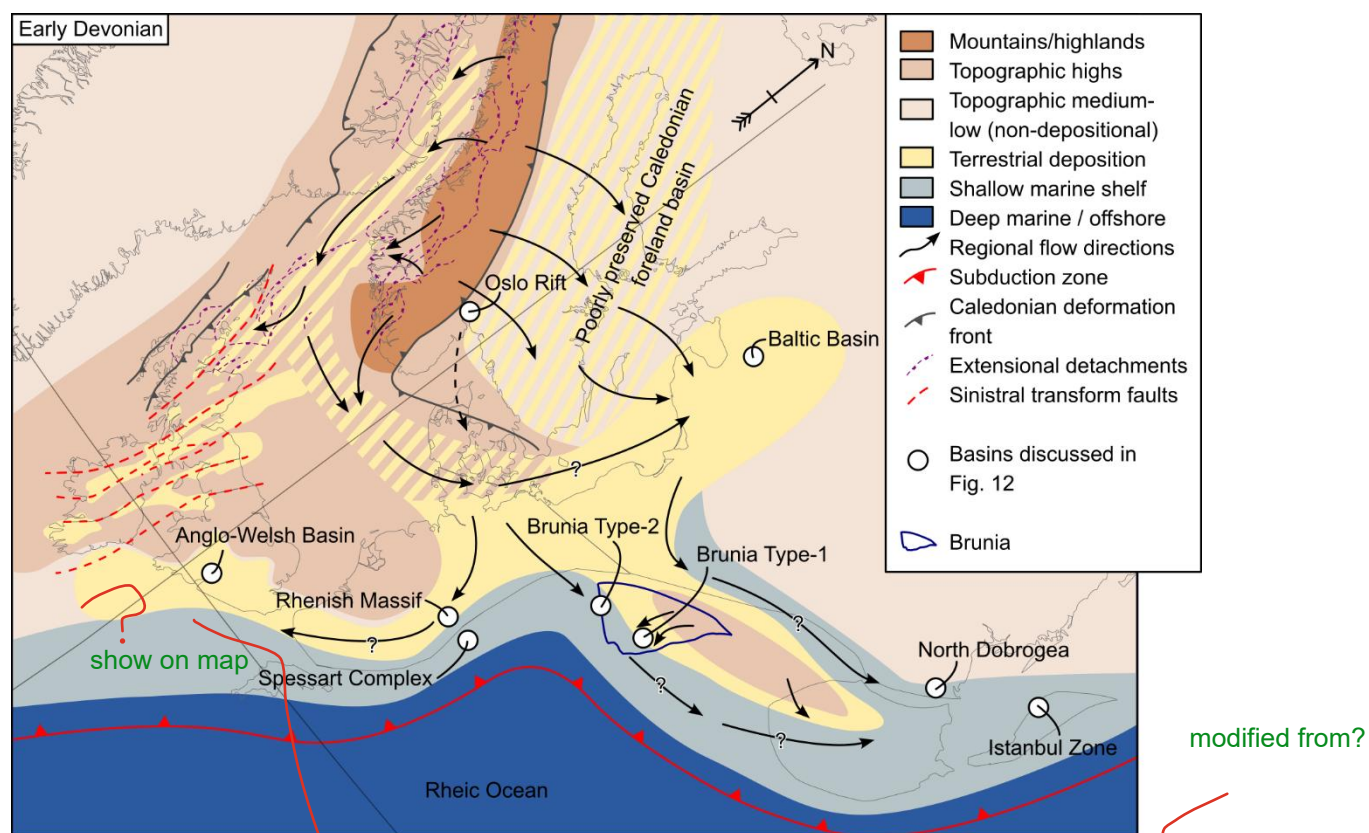

Figure 13: Conceptual paleogeographic map for the Lower Devonian indicating the distribution pattern of detritus from the Scandinavian Caledonian Mountains into Devonian terrestrial and shallow marine basins discussed in this work. Also highlighted is the exposed Slavkov Terrane basement in the east of Brunia that fed the Type-1 samples. Figure influenced by Cederbom et al. (2000); Fossen (2010); and Davies et al. (2024).

565 The preference for a Baltica rather than a Laurentia source is reflected in the relative proportions of early versus late Mesoproterozoic zircon populations. In all examples cited above these two populations are broadly balanced. In contrast, Ordovician–Silurian strata within the Acadian foreland basin are dominated by late Mesoproterozoic zircons (Bradley and Sullivan, 2017; Perrot et al., 2025). Waldron et al. (2014) likewise reported late Mesoproterozoic dominance in Laurentian-derived Ordovician–Silurian strata of the Southern Uplands Terrane in Scotland. Compare also the late Neoproterozoic strata of East Greenland (Sláma et al., 2011) with those of Fennoscandia (Sláma, 2016); the former is dominated by late Mesoproterozoic zircon and the latter exhibits a more balanced distribution of early and late Mesoproterozoic zircons. This distinction is illustrated in Fig. 14, which displays the geographic distribution of detrital zircon data from Late Ordovician to Late Devonian strata in the database of Collett (2025), classified into six provenance types based on the positions and relative abundances of zircon age maxima.

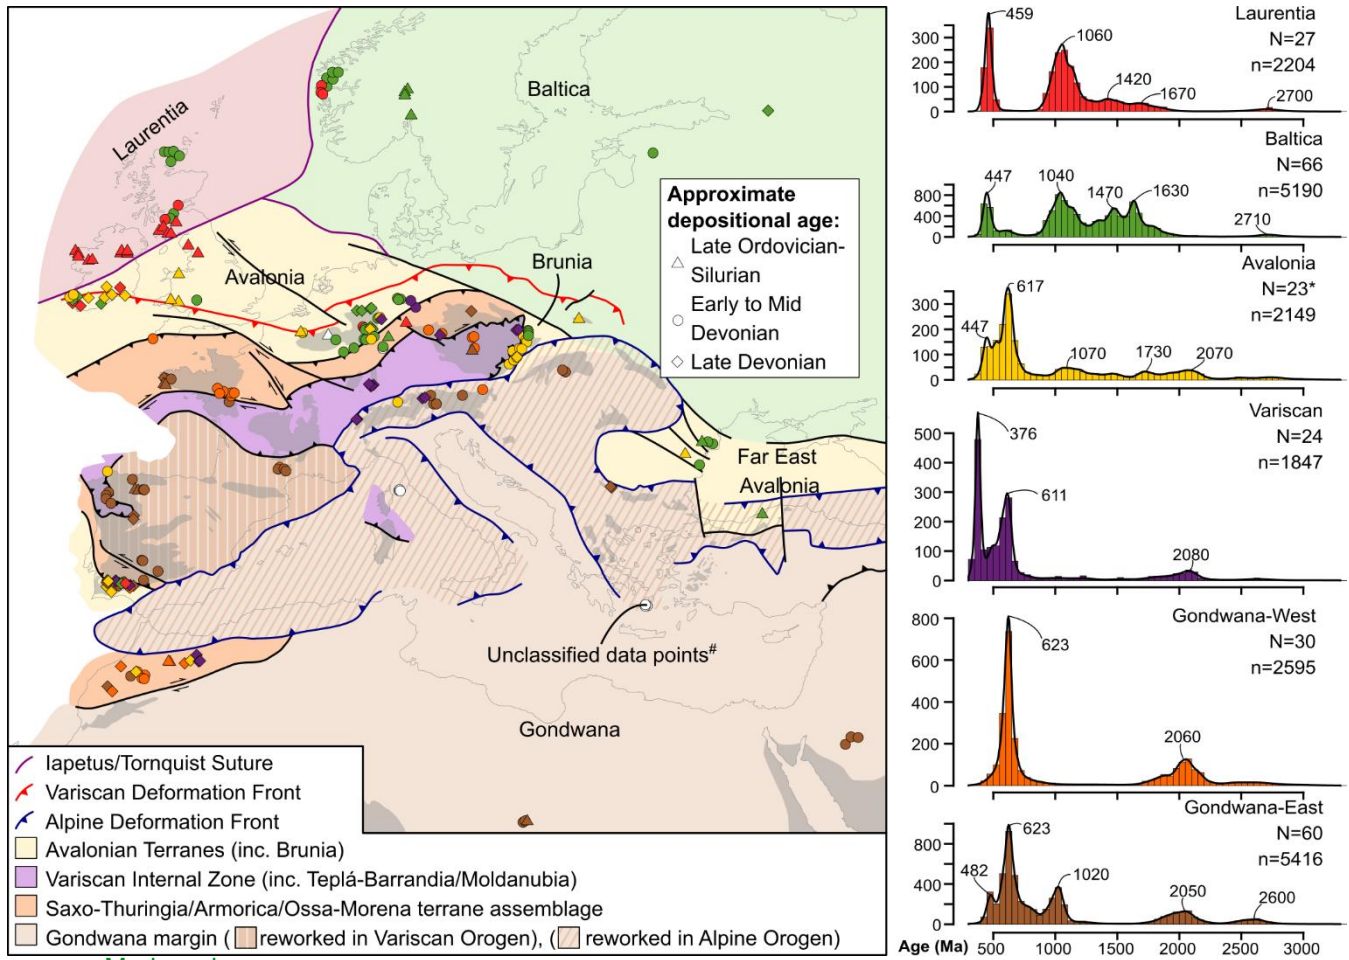

575

580

585

**Figure 14:** Distribution of Late Ordovician–Devonian strata with published U–Pb zircon isotopic data in the database of Collett (2025). Samples with high proportion of Mesoproterozoic zircons and low proportion of late Neoproterozoic are classified as either ‘Laurentian’ or ‘Baltican’ based on relative abundance of early versus late Mesoproterozoic zircons and by analogy to the Late Ordovician–Silurian strata of the Southern Uplands (Laurentia) and Oslo Rift (Baltica). ‘Avalonian’ samples have Late Neoproterozoic maxima and scattered presence of Meso- and Paleoproterozoic zircons. \*Brunia type-1 strata of this study technically belong to this provenance but are not included in the compiled histogram due to extreme low abundance of older than Neoproterozoic zircons that would mask the presence of these zircons in other compiled data. ‘Variscan’ provenance are attributed to samples with prominent Devonian zircon population (min. 10%). ‘Gondwana-East’ and ‘Gondwana-West’ spectra are discriminated by the relative abundance of Stenian–Tonian maxima and the typical association of late Neoproterozoic and Paleoproterozoic maxima. #Unclassified samples in the Cyclades, on Elba island and in the Rhenish Massif have singular Ordovician or Silurian maxima. The basemap is modified from Mazur et al. (2025).

#### 5.2.4 Implications for continuation of the Rheic Ocean in the Devonian

Not depicted in Figs. 11–14 are data from Lower Devonian strata of Saxo-Thuringia recently reported by Linnemann et al. (2025). These preliminary results, published without supporting raw data, show abundant Stenian (1200–1000 Ma) zircons. Linnemann et al. (2025) suggest that these zircons derive from a source region similar to that of the Stenian zircons found in the Lower Devonian Harz Mountains strata and the Rögis Quartzite. Their interpretation is based on a paleogeographic model

590



assuming the complete closure of the Rheic Ocean during the late Silurian–Early Devonian and a Laurussian provenance for the Stenian zircons. It is hard to evaluate this properly without the supporting raw data; however, we are sceptical of this conclusion. Notably, the Lower Devonian Saxo-Thuringian strata appear to contain virtually no zircons in the 1700–1500 Ma range but do include appreciable Neoproterozoic (900–550 Ma) and Paleoproterozoic (2100–1800 Ma) components, with no detectable Ordovician or Silurian zircons. In these respects, the Lower Devonian Saxo-Thuringian strata differ from either the Baltica or Laurentia detrital signals depicted in Fig. 13. Instead, the influx of Stenian zircons more closely resembles that reported from Gondwanan regions, including Iberia, Armorica, the Alps, and the Western Carpathians, that are included in the Gondwana-East provenance signal in Fig. 13 (see more detailed discussions on this topic in Soejono et al., 2024; Collett, 2025).

A potential test of this hypothesis lies in Hf-in-zircon isotopic data. Stenian zircons in this study, as well as those from the Rögis Quartzite and Fennoscandia, exhibit a relatively limited spread in Hf isotopic values clustering near or above chondritic values ( $\epsilon_{\text{Hf}(t)} = -8$  to  $+6$ ). In contrast, Stenian zircons from Devonian strata in Iberia, Armorica, and the Western Carpathians (as well as recent Nile River sands) show a much wider range of Hf isotopic values ( $\epsilon_{\text{Hf}(t)} = -25$  to  $+10$ ), with a tendency toward more negative  $\epsilon_{\text{Hf}(t)}$  values (see figures in Soejono et al., 2024 and references therein).

If our interpretation is correct; that the Stenian zircons in Saxo-Thuringia derive from Gondwana, while the 1800–900 Ma zircons in the Type-2 Brunia strata originate from Laurussia, then the apparent lack of mixing between these two provenance signals in Devonian strata of the Bohemian Massif (Fig. 11) strongly suggests that the Rheic Ocean remained open as a barrier to detritus throughout the Devonian. In this scenario, Brunia would have been situated on the northern margin of the Rheic Ocean, with Saxo-Thuringia (and possibly also Teplá-Barrandia; although the influx of Stenian zircons is not well-documented here) lying to its south. This interpretation aligns with paleogeographic models proposed by Collett et al. (2022b), but leaves two principal unresolved questions.

The first concerns the tectonic relationship of the Rögis Quartzite, and by extension the entire Mid-German Crystalline Rise, to Saxo-Thuringia. Although often considered a northern continuation of Saxo-Thuringia (e.g., Linnemann et al., 2025), other models propose that the Mid-German Crystalline Rise internally hosts the Rheic Suture (e.g., Zeh and Gerdes, 2010).

The second issue concerns the position of the Rheic Suture within the Bohemian Massif. It is unlikely to coincide strictly with the Moldanubian Thrust, the traditional western boundary of Brunia, because the Drosendorf Unit within the Moldanubian Thrust hanging wall has a demonstrably Brunia-derived character (e.g., Sorger et al., 2020). Recent reports of Mesoproterozoic (~1.3 Ga) crustal material deeper within Moldanubia (Soejono et al., in review) further challenge the long-held assumption of a purely Gondwanan provenance for this domain. Consequently, the Rheic Suture may lie internally within Moldanubia, at the Moldanubia–Teplá-Barrandia boundary (now largely obscured by the Central Bohemian Plutonic Complex), or may yet equate to the Saxothuringian Suture. Resolving this question will require carefully targeted provenance analyses of the complex, high-grade metamorphic rocks that constitute the Moldanubian basement.



## 6 Conclusions

- 625
- Detrital zircon isotopic data from Devonian (pre-orogenic) strata of Brunia (easternmost European Variscides) reveal two distinctly contrasting provenance signatures. Most samples exhibit unimodal populations of late Neoproterozoic zircons with positive  $\epsilon_{\text{Hf}(t)}$  values (Type-1 spectra), indicating erosion from a local source within the Brunia basement. In contrast, a subset of samples from northern Brunia (Type-2 spectra) display broader age distributions, with prominent peaks spanning the late Paleoproterozoic to early Neoproterozoic (c. 1800–900 Ma), alongside minor
- 630
- populations of Neoproterozoic, Ediacaran, and Ordovician–Silurian zircons.
  - The Type-1 spectra closely resemble detrital zircon populations from Ediacaran strata in Brunia. The stratigraphic (Ediacaran vs. Devonian) age of some clastic strata remains uncertain and zircon U–Pb data alone cannot fully resolve these age relationships. However, differences in Hf-in-zircon isotopic signatures may provide additional potential for stratigraphic discrimination.
- 635
- When combined, the Devonian and Ediacaran zircon datasets from Brunia show striking similarities to those from Ediacaran strata in West Avalonia supporting a shared Late Neoproterozoic provenance. Our findings do not support a shared Neoproterozoic history with other parts of the Bohemian Massif, nor do they suggest that Brunia was the primary source of Late Neoproterozoic zircon grains found in southwestern Baltica.
  - The Type-2 spectra differ significantly from all previously reported detrital zircon datasets from Brunia, instead
- 640
- exhibiting strong similarity to Lower Devonian strata across Laurussia. The most plausible source for these zircons is erosion of the Caledonian mountains in Fennoscandia. *at what time?*
  - This Caledonian-derived detritus was dispersed widely, covering regions of the modern Arctic Ocean, eastern Greenland, Atlantic North America, and extensive parts of Northern and Central Europe, extending into Anatolia. Notably, this spectral signature has not been credibly identified within the internal domains of the European
- 645
- Variscides, implying that the Rheic Ocean remained an effective barrier to such detrital material well into the Devonian.
  - Consequently, the Rheic Suture must lie within the Bohemian Massif, although its precise location remains unresolved. A renewed focus on the provenance of high-grade rocks in the Moldanubian Zone is therefore essential to better constrain the position and nature of this suture.

## 650 Author contributions

SC: Conceptualization, Data curation, Investigation, Visualization, Writing (original draft preparation). IS: Conceptualization, Investigation, Writing (review and editing). TK: Resources, Investigation, Writing (review and editing). PH: Resources, Investigation, Writing (review and editing). JM: Methodology, Formal analysis. NN: Formal analysis. JS: Methodology, Formal analysis.



## 655 **Competing interests**

The authors declare that they have no conflict of interest.

## **Disclaimer**

Copernicus Publications remains neutral with regard to jurisdictional claims made in the text, published maps, institutional affiliations, or any other geographical representation in this paper. While Copernicus Publications makes every effort to include  
660 appropriate place names, the final responsibility lies with the authors. Views expressed in the text are those of the authors and do not necessarily reflect the views of the publisher.

## **Acknowledgements**

Martin Štrba is thanked for help with preparing zircon separates for this study.

## **Financial support**

665 This study was funded by the Grant Agency of the Czech Republic (GAČR 24-12999S to S. Collett) and by Research Project no. 311300 (Strategic Research Plan of the Czech Geological Survey – DKRVO/ČGS 2023–2027).

## **References**

- Akdoğan, R., Hu, X., Okay, A. I., Topuz, G., and Xue, W.: Provenance of the Paleozoic to Mesozoic Siliciclastic Rocks of the Istanbul Zone Constrains the Timing of the Rheic Ocean Closure in the Eastern Mediterranean Region, *Tectonics*, 40,  
670 <https://doi.org/10.1029/2021tc006824>, 2021.
- Anfinson, O. A., Odum, M. L., Piepjohn, K., Poulaki, E. M., Shephard, G. E., Stockli, D. F., Levang, D., Jensen, M. A., and Pavlovskaja, E. A.: Provenance Analysis of the Andrée Land Basin and Implications for the Paleogeography of Svalbard in the Devonian, *Tectonics*, 41, <https://doi.org/10.1029/2021tc007103>, 2022.
- Balintoni, I. and Balica, C.: Peri-Amazonian provenance of the Euxinic Craton components in Dobrogea and of the North  
675 Dobrogean Orogen components (Romania): A detrital zircon study, *Precambrian Research*, 278, 34–51, <https://doi.org/10.1016/j.precamres.2016.03.008>, 2016.
- Belka, Z., Valverde-Vaquero, P., Dörr, W., Ahrendt, H., Wemmer, K., Franke, W., and Schäfer, J.: Accretion of first Gondwana-derived terranes at the margin of Baltica, *GSL Special Publications*, 201, 19–36, <https://doi.org/10.1144/gsl.sp.2002.201.01.02>, 2002.



- 680 Beranek, L. P., Gee, D. G., and Fisher, C. M.: Detrital zircon U-Pb-Hf isotope signatures of Old Red Sandstone strata constrain the Silurian to Devonian paleogeography, tectonics, and crustal evolution of the Svalbard Caledonides, *GSA Bulletin*, 132, 1987–2003, <https://doi.org/10.1130/b35318.1>, 2020.
- Beranek, L. P., Hutter, A. D., Pearcey, S., James, C., Langor, V., Pike, C., Goudie, D., and Oldham, L.: New evidence for the Baltican cratonic affinity and Tonian to Ediacaran tectonic evolution of West Avalonia in the Avalon Peninsula, Newfoundland, Canada, *Precambrian Research*, 390, 107046, <https://doi.org/10.1016/j.precamres.2023.107046>, 2023.
- 685 Bradley, D. C., and O’Sullivan, P.: Detrital zircon geochronology of pre- and syncollisional strata, Acadian orogen, Maine Appalachians, *Basin Research*, 29, 571–590. <https://doi.org/10.1111/bre.12188>, 2017.
- Callegari, R., Mazur, S., McClelland, W. C., Barnes, C. J., Ziemniak, G., Kościńska, K., and Majka, J.: Middle Cambrian convergence at the southwestern Baltica margin, Holy Cross Mts., Poland, and its significance for reconstructions of early Gondwana. *Geoscience Frontiers*, 16, 101972. <https://doi.org/10.1016/j.gsf.2024.101972>, 2025.
- 690 Cederbom, C., Larson, S. Å., Tullborg, E.-L., and Stiberg, J.-P.: Fission track thermochronology applied to Phanerozoic thermotectonic events in central and southern Sweden, *Tectonophysics*, 316, 153–167, [https://doi.org/10.1016/s0040-1951\(99\)00230-9](https://doi.org/10.1016/s0040-1951(99)00230-9), 2000.
- Chlupáč, I.: Orientační výzkum některých menších výskytů devonu na Dražanské vysočině. *Zpr Geol Výzk v Roce 1960*, 89–95, 1961.
- 695 Chlupáč, I.: Fossil communities in the metamorphic Lower Devonian of the Hrubý Jeseník Mts., Czechoslovakia. *Neues Jahrbuch Für Geologie und Paläontologie—Abhandlungen*, 177, 367–392, 1989.
- Chlupáč, I.: Devonští trilobiti Moravy a Slezska, jejich výskyt a význam. *Přírodovědné Studie Muzea Prostějovska*, 3, 1–26, 2000.
- 700 Chlupáč, I., and Svoboda, J.: Geological conditions of the Konice-Mladec Devonian in the Dražany Upland. *Sbor Ustr Ust Geol*, 28, 347–418, 1963.
- Collett, S.: Detrital zircon tales between the Rodinia and Pangaea supercontinents; exploring connections between Avalonia, Cadomia and Central Asia, *Journal of the Geological Society*, 182, <https://doi.org/10.1144/jgs2024-026>, 2025.
- Collett, S., Štípská, P., Schulmann, K., Míková, J., and Kröner, A.: Tectonic significance of the Variscan suture between Brunovistulia and the Bohemian Massif, *Journal of the Geological Society*, 178, <https://doi.org/10.1144/jgs2020-176>, 2021.
- 705 Collett, S., Mazur, S., Schulmann, K., and Soejono, I.: Significance of a late neoproterozoic – Early Cambrian southern Baltica active margin in late-stage Rodinian and early Gondwanan reconstructions, *Precambrian Research*, 383, 106918, <https://doi.org/10.1016/j.precamres.2022.106918>, 2022a.
- Collett, S., Schulmann, K., Deiller, P., Štípská, P., Peřestý, V., Ulrich, M., Jiang, Y., de Hoym de Marien, L., and Míková, J.: Reconstruction of the mid-Devonian HP-HT metamorphic event in the Bohemian Massif (European Variscan belt), *Geoscience Frontiers*, 13, 101374, <https://doi.org/10.1016/j.gsf.2022.101374>, 2022b.
- 710



- Davies, N. S., McMahon, W. J., and Berry, C. M.: Earth's earliest forest: fossilized trees and vegetation-induced sedimentary structures from the Middle Devonian (Eifelian) Hangman Sandstone Formation, Somerset and Devon, SW England, *Journal of the Geological Society*, 181, <https://doi.org/10.1144/jgs2023-204>, 2024.
- 715 Dörr, W., Blau, J., Marko, L., Petschick, P., Petschick, R., Prinz-Grimm, P., Schastok, J., and Velledits, F.: Provenance analysis of the Rhenohercynian Basin and its southern collision zone: transition from a Silurian volcanic arc to the Rhenohercynian shelf (Central European Variscides), *International Journal of Earth Sciences*, 114, 55–74, <https://doi.org/10.1007/s00531-024-02480-0>, 2025.
- Drost, K., Gerdes, A., Jeffries, T., Linnemann, U., and Storey, C.: Provenance of Neoproterozoic and early Paleozoic siliciclastic rocks of the Teplá-Barrandian unit (Bohemian Massif): Evidence from U–Pb detrital zircon ages, *Gondwana Research*, 19, 213–231, <https://doi.org/10.1016/j.gr.2010.05.003>, 2011.
- Dvořák, J., and Skoček, V.: Evidence of coastal sabkha in the Early Devonian sequence at Tišnov, Western Moravia. *Czech Geol. Survey Bull*, 72, 273–276, 1997.
- Eckelmann, K., Nesbor, H.-D., Königshof, P., Linnemann, U., Hofmann, M., Lange, J.-M., and Sagawe, A.: Plate interactions of Laurussia and Gondwana during the formation of Pangaea — Constraints from U–Pb LA–SF–ICP–MS detrital zircon ages of Devonian and Early Carboniferous siliciclastics of the Rhenohercynian zone, Central European Variscides, *Gondwana Research*, 25, 1484–1500, <https://doi.org/10.1016/j.gr.2013.05.018>, 2014.
- 725 Finger, F., Hanžl, P., Pin, C., von Quadt, A., and Steyrer, H. P.: The Brunovistulian: Avalonian Precambrian sequence at the eastern end of the Central European Variscides?, *GSL Special Publications*, 179, 103–112, <https://doi.org/10.1144/gsl.sp.2000.179.01.08>, 2000.
- Fossen, H.: Extensional tectonics in the North Atlantic Caledonides: a regional view, *GSL Special Publications*, 335, 767–793, <https://doi.org/10.1144/sp335.31>, 2010.
- Friedl, G., Finger, F., Paquette, J.-L., von Quadt, A., McNaughton, N. J. and Fletcher, I. R.: Pre-Variscan geological events in the Austrian part of the Bohemian Massif deduced from U–Pb zircon ages, *Int J Earth Sci*, 93, 802–823, <https://doi.org/10.1007/s00531-004-0420-9>, 2004.
- 735 Gibling, M. R. and Davies, N. S.: Palaeozoic landscapes shaped by plant evolution, *Nature Geosci*, 5, 99–105, <https://doi.org/10.1038/ngeo1376>, 2012.
- Gómez, N., Lowe, D., Mills, A., Kommescher, S., and Lam, R.: Interplay of Ediacaran glaciation and sediment provenance revealed by detrital zircon U–Pb geochronology and Hf isotope geochemistry in the Bonavista Peninsula (Newfoundland), *Geological Society of America Bulletin*, 138, 278–298, <https://doi.org/10.1130/b38347.1>, 2025.
- 740 Habryn, R., Krzemińska, E., Krzemiński, L., Markowiak, M., and Zieliński, G.: Detrital zircon age data from the conglomerates in the Upper Silesian and Małopolska blocks, and their implications for the pre-Variscan tectonic evolution (S Poland), *Geological Quarterly*, 64, 321–341, <http://dx.doi.org/10.7306/gq.1539>, 2020.

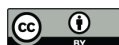

- Hanžl, P., Janoušek, V., Žáček, V., Wilimský, D., Aichler, J., Erban, V., Pudilová, M., Chlupáčová, M., Buriánková, K., Mixa, P., and Pecina, V.: Magmatic history of granite-derived mylonites from the southern Desná Unit (Silesicum, Czech Republic), *Mineralogy and Petrology*, 89, 45–75, <https://doi.org/10.1007/s00710-006-0137-5>, 2007.
- Hanžl, P., Janoušek, V., Soejono, I., Buriánek, D., Svojtka, M., Hrdličková, K., Erban, V., and Pin, C.: The rise of the Brunovistulicum: age, geological, petrological and geochemical character of the Neoproterozoic magmatic rocks of the Central Basic Belt of the Brno Massif, *Int J Earth Sci (Geol Rundsch)*, 108, 1165–1199, <https://doi.org/10.1007/s00531-019-01700-2>, 2019.
- Hanžl, P., Janoušek, V., Buriánek, D., Hrdličková, K., Finger, F., and Kalvoda, J.: The Brunovistulicum—the Neoproterozoic Basement of the Eastern Bohemian Massif, in: *The Variscan Orogen of Central Europe*, edited by: Linnemann, U., Springer, Cham, Switzerland, 223–240, [https://doi.org/10.1007/978-3-031-82911-6\\_8](https://doi.org/10.1007/978-3-031-82911-6_8), 2025.
- Hegner, E. and Kröner, A.: Review of Nd isotopic data and xenocrystic and detrital zircon ages from the pre-Variscan basement in the eastern Bohemian Massif: speculations on palinspastic reconstructions, *GSL Special Publications*, 179, 113–129, <https://doi.org/10.1144/gsl.sp.2000.179.01.09>, 2000.
- Havlíček, V. and Mergl, M.: Lower Devonian brachiopods at Petrovice (Drahany Upland, Moravia), *Journal of the Czech Geological Society*, 35, 225–238, 1990.
- Hladil, J.: Moravian middle and late Devonian buildups: evolution in time and space with respect to the Laurussian shelf, *Courier Forsch-Inst Senckenberg* 172, 111–125, 1994.
- Hladil, J., Kalvoda, J. and Vavrdová, M.: Některé nové mikropaleontologické údaje z Nížkého Jeseníku, *Knihovnička Zemního Plynů a Naft 6a, Miscellanea micropaleontologica II/1*, 97–118, 1987.
- Hladil, J., Melichar, R., Otava, J., Galle, A., Krs, M., Man, O., Pruner, P., Cejchan, P. and Orel, P.: The Devonian in the Easternmost Variscides, Moravia; a holistic analysis directed towards comprehension of the original context, *Abhandlungen der geologischen Bundesanstalt* 54, 27–47, 1999.
- Jähne, B., Jeffries, T., Linnemann, U. and Ullrich, B.: The provenance of the Caminaberg Quartzite constrained by U-Pb LA-ICP-MS ages of detrital zircons (Görlitz Schist Belt, Saxo-Thuringian Zone), *Geologica Saxonica*, 59, 2013.
- Janoušek, V., Aichler, J., Hanžl, P., Gerdes, A., Erban, V., Žáček, V., Pecina, V., Pudilová, M., Hrdličková, K., Mixa, P. and Žáčková, E.: Constraining genesis and geotectonic setting of metavolcanic complexes: a multidisciplinary study of the Devonian Vrbno Group (Hrubý Jeseník Mts., Czech Republic), *International Journal of Earth Sciences*, 103, 455–483, <https://doi.org/10.1007/s00531-013-0975-4>, 2014.
- Jastrzębski, M., Żelaźniewicz, A., Murtezi, M., Larionov, A. N. and Sergeev, S.: The Moldanubian Thrust Zone — A terrane boundary in the Central European Variscides refined based on lithostratigraphy and U–Pb zircon geochronology, *Lithos*, 220–223, 116–132, <https://doi.org/10.1016/j.lithos.2015.01.023>, 2015.
- Jastrzębski, M., Żelaźniewicz, A., Sláma, J., Machowiak, K., Śliwiński, M., Jaźwa, A. and Kocjan, I. Provenance of Precambrian basement of the Brunovistulian Terrane: New data from its Silesian part (Czech Republic, Poland), central



- Europe, and implications for Gondwana break-up, *Precambrian Research*, 355, 106108, <https://doi.org/10.1016/j.precamres.2021.106108>, 2021.
- Jastrzębski, M., Żelaźniewicz, A., Sláma, J., Krzemińska, E., and Śliwiński, M.: The Eo-Variscan domain in the Variscan belt: New data from the Sudetes, southern Poland, *Lithos*, 504–505, 108058, <https://doi.org/10.1016/j.lithos.2025.108058>, 2025.
- Kalvoda, J., Babek, O., Fatka, O., Leichmann, J., Melichar, R., Nehyba, S., and Spacek, P.: Brunovistulian terrane (Bohemian Massif, Central Europe) from late Proterozoic to late Paleozoic: a review, *Int J Earth Sci (Geol Rundsch)*, 97, 497–518, <https://doi.org/10.1007/s00531-007-0183-1>, 2008.
- Kalvoda, J., Kumpan, T., Bábek, O., Buriánek, D., and Melichar, R.: Palaeozoic Cover of the Brunovistulian Unit, in: *The Variscan Orogen of Central Europe*, edited by: Linnemann, U., Springer, Cham, Switzerland, 241–260, [https://doi.org/10.1007/978-3-031-82911-6\\_9](https://doi.org/10.1007/978-3-031-82911-6_9), 2025.
- Kirchner, F. and Albert, R.: New detrital zircon age data reveal the location of the Rheic suture in the Mid-German Crystalline Zone (Spessart and Odenwald Crystalline Complexes), *Int J Earth Sci (Geol Rundsch)*, 109, 2287–2305, <https://doi.org/10.1007/s00531-020-01899-5>, 2020.
- Koglin, N., Zeh, A., Franz, G., Schüssler, U., Glodny, J., Gerdes, A., and Brätz, H.: From Cadomian magmatic arc to Rheic ocean closure: The geochronological-geochemical record of nappe protoliths of the Münchberg Massif, NE Bavaria (Germany), *Gondwana Research*, 55, 135–152, <https://doi.org/10.1016/j.gr.2017.11.001>, 2018.
- Košler, J., Konopásek, J., Sláma, J., and Vrána, S.: U–Pb zircon provenance of Moldanubian metasediments in the Bohemian Massif, *JGS*, 171, 83–95, <https://doi.org/10.1144/jgs2013-059>, 2013.
- Koverdynský, B.: Geologické problémy silezika, *Geologie Moravy a Slezska*, 31–40, 1993.
- Koverdynský, B. and Hladil, J.: Stáří vitošovských vápenců (devon, severozápadní Morava), *Věstník Ústředního Ústavu geologického*, 60, 1–7, 1985.
- Koverdynský, B. and Zikmundová, J.: K stratigrafické příslušnosti vrbenské série a andělskohorských vrstev v oblasti Jeseníků, *Věstník Ústředního Ústavu geologického*, 61, 367–373, 1966.
- Kristoffersen, M., Andersen, T. and Andresen, A.: U–Pb age and Lu–Hf signatures of detrital zircon from Palaeozoic sandstones in the Oslo Rift, Norway, *Geological Magazine*, 151, 816–829. <https://doi.org/10.1017/s0016756813000885>, 2014.
- Krmíček, L. and Přichystal, A.: Petrology of the oldest polymict conglomerate at the eastern margin of the Rhenohercynian Zone: evidence for initial rifting of the Brunovistulian terrane in Moravia. In: *5th Meeting of the Central European Tectonic Studies Group*, April 11–14, 2007, Teplá, Czech Republic, 49–50. ISBN 978-80-7075-695, 2007.
- Krmíčková, S., Krmíček, L., Timmerman, M. J., Sláma, J., and Míková, J.: Origin of the Brunovistulian microcontinent: Geochemical and Sr–Nd–Pb–Hf isotope evidence, *Precambrian Research*, 428, 107902, <https://doi.org/10.1016/j.precamres.2025.107902>, 2025.
- Krs, M., Pruner, P., and Man, O.: Tectonic and paleogeographic interpretation of the paleomagnetism of Variscan and pre-Variscan formations of the Bohemian Massif, with special reference to the Barrandian terrane, *Tectonophysics*, 332, 93–114, [https://doi.org/10.1016/s0040-1951\(00\)00251-1](https://doi.org/10.1016/s0040-1951(00)00251-1), 2001.



- Kumpan, T., Kalvoda, J., Bábek, O., Matys Grygar, T., and Frýda, J.: The Devonian-Carboniferous boundary in the Moravian Karst (Czech Republic), *Palaeobio Palaeoenviron*, 101, 473–485, <https://doi.org/10.1007/s12549-019-00409-z>, 2020.
- Kumpera, O. and Martinec, P.: The development of the Carboniferous accretionary wedge in the Moravian-Silesian Paleozoic Basin, *Journal of the Czech Geological Society*, 4011, 47, 1995.
- 815 Lindner, M., Dörr, W., Reither, D., and Finger, F.: The Dobra Gneiss and the Drosendorf Unit in the southeastern Bohemian Massif, Austria: West Amazonian crust in the heart of Europe, *GSL Special Publications*, 503, 185–207, <https://doi.org/10.1144/sp503-2019-232>, 2020.
- Linnemann, U., Gerdes, A., Hofmann, M., and Marko, L.: The Cadomian Orogen: Neoproterozoic to Early Cambrian crustal growth and orogenic zoning along the periphery of the West African Craton—Constraints from U–Pb zircon ages and Hf isotopes (Schwarzburg Antiform, Germany), *Precambrian Research*, 244, 236–278, <https://doi.org/10.1016/j.precamres.2013.08.007>, 2014.
- Linnemann, U., Pidal, A. P., Hofmann, M., Drost, K., Quesada, C., Gerdes, A., Marko, L., Gärtner, A., Zieger, J., Ulrich, J., Krause, R., Vickers-Rich, P., and Horak, J.: A ~565 Ma old glaciation in the Ediacaran of peri-Gondwanan West Africa, *Int J Earth Sci (Geol Rundsch)*, 107, 885–911, <https://doi.org/10.1007/s00531-017-1520-7>, 2018.
- 825 Linnemann, U., Zweig, M., Zieger-Hofmann, M., Vietor, T., Zieger, J., Haschke, J., Gärtner, A., Mende, K., Krause, R., and Knolle, F.: The Harz Mountains (Germany) – Cadomia meets Avalonia and Baltica: U–Pb ages of detrital and magmatic zircon as a key for the decoding of Pangaea’s central suture, *GSL Special Publications*, 542, 403–431, <https://doi.org/10.1144/sp542-2023-52>, 2024.
- Linnemann, U., Bartzsch, K., Zieger-Hofmann, M., Zieger, J., Gärtner, A., Rojo-Perez, E., and Mende, K.: The Saxothuringian Zone—From Cadomian Subduction to Variscan Collision, in: *The Variscan Orogen of Central Europe*, edited by: Linnemann, U., Springer, Cham, Switzerland, 279–345, [https://doi.org/10.1007/978-3-031-82911-6\\_11](https://doi.org/10.1007/978-3-031-82911-6_11), 2025.
- Lorenz, H., Gee, D. G., Korago, E., Kovaleva, G., McClelland, W. C., Gilotti, J. A., and Frei, D.: Detrital zircon geochronology of Palaeozoic Novaya Zemlya – a key to understanding the basement of the Barents Shelf, *Terra Nova*, 25, 496–503, <https://doi.org/10.1111/ter.12064>, 2013.
- 835 Martínez Catalán, J. R., Schulmann, K., and Ghienne, J.-F.: The Mid-Variscan Allochthon: Keys from correlation, partial retrodeformation and plate-tectonic reconstruction to unlock the geometry of a non-cylindrical belt, *Earth-Science Reviews*, 220, 103700, <https://doi.org/10.1016/j.earscirev.2021.103700>, 2021.
- Matte, Ph., Maluski, H., Rajlich, P., and Franke, W.: Terrane boundaries in the Bohemian Massif: Result of large-scale Variscan shearing, *Tectonophysics*, 177, 151–170, [https://doi.org/10.1016/0040-1951\(90\)90279-h](https://doi.org/10.1016/0040-1951(90)90279-h), 1990.
- 840 Mazur, S., Collett, S., Palomeras, I., Schiffer, C., and Vanderhaeghe, O.: Extent and Role of Cratonic Lithosphere in the Variscan Orogeny, *Elements*, 21, 401–407, <https://doi.org/10.2138/gselements.21.6.401>, 2025.
- Mende, K., Linnemann, U., Nesbor, H.-D., Miltzer, A., Jansen, U., Königshof, P., Bahlburg, H., Hofmann, M., Gerdes, A., Berndt, J., and Nawrat, J.: Provenance of exotic Ordovician and Devonian sedimentary rock units from the Rhenish Massif (Central European Variscides, Germany), *Tectonophysics*, 755, 127–159, <https://doi.org/10.1016/j.tecto.2018.10.029>, 2019.



- 845 Mikuláš, R., Gilíková, H. and Vavrdová, M.: Late Proterozoic to Early Palaeozoic platform deposits of Southern Moravia (Czech Republic), *Geological Quarterly*, 52, 335-335, 2008.
- Moczydlowska, M.: Proterozoic and Cambrian successions in Upper Silesia: an Avalonian terrane in southern Poland, *Geological Magazine*, 134, 679–689. <https://doi.org/10.1017/s0016756897007504>, 1997.
- Murphy, J. B., Nance, R. D., and Wu, L.: The provenance of Avalonia and its tectonic implications: a critical reappraisal, *GSL Special Publications*, 531, 207–247, <https://doi.org/10.1144/sp531-2022-176>, 2023.
- 850 Nance, R. D., Gutiérrez-Alonso, G., Keppie, J. D., Linnemann, U., Murphy, J. B., Quesada, C., Strachan, R. A., and Woodcock, N. H.: A brief history of the Rheic Ocean, *Geoscience Frontiers*, 3, 125–135, <https://doi.org/10.1016/j.gsf.2011.11.008>, 2012.
- Nawrocki, J., Zylińska, A., Bula, Z., Grabowski, J., Krzywiec, P., and Poprawa, P.: Early Cambrian location and affinities of the Brunovistulian terrane (Central Europe) in the light of palaeomagnetic data, *JGS*, 161, 513–522, 855 <https://doi.org/10.1144/0016-764903-083>, 2004.
- Nawrocki, J., Leichmann, J., and Pańczyk, M.: Mid-Ediacaran bimodal magmatism and peri-Baltic affinity of the Brunovistulian terrane documented by the U-Pb isotope and palaeomagnetic data from the Brno Massif (Central Europe), *Precambrian Research*, 358, 106147, <https://doi.org/10.1016/j.precamres.2021.106147>, 2021.
- Nehyba, S., Leichmann, J. and Kalvoda, J.: Depositional environment of the Old Red’ sediments in the Brno area (South- 860 eastern part of the Rhenohercynian zone, Bohemian massif), *Geologica Carpathica*, 52, 195–203, 2001.
- Oczlon, M. S., Seghedi, A., and Carrigan, C. W.: Avalonian and Baltican terranes in the Moesian Platform (southern Europe, Romania, and Bulgaria) in the context of Caledonian terranes along the southwestern margin of the East European craton, in: *The Evolution of the Rheic Ocean: From Avalonian-Cadomian Active Margin to Alleghenian-Variscan Collision*, edited by: Linnemann, U., Nance, R. D., Kraft, P. and Zulauf, G., The Geological Society of America, 865 [https://doi.org/10.1130/2007.2423\(18\)](https://doi.org/10.1130/2007.2423(18)), 2007.
- Paszkowski, M., Budzyń, B., Mazur, S., Sláma, J., Środoń, J., Millar, I. L., Shumlyanskyy, L., Kędzior, A., and Liivamägi, S.: Detrital zircon U-Pb and Hf constraints on provenance and timing of deposition of the Mesoproterozoic to Cambrian sedimentary cover of the East European Craton, part II: Ukraine, *Precambrian Research*, 362, 106282, <https://doi.org/10.1016/j.precamres.2021.106282>, 2021.
- 870 Perrot, M. G., Waldron, J. W. F., Luo, Y., Chiaradia, M., Dahn, D., Pearson, G. D., and Davies, J. H. F. L.: Linking detrital minerals to their source: The use of U-Pb-Hf data to untangle Laurentian and Gondwanan (Ganderian) sources, *Geological Society of America Bulletin*, 138, 429–444, <https://doi.org/10.1130/b38057.1>, 2025.
- Põldvere, A., Isozaki, Y., Bauert, H., Kirs, J., Aoki, K., Sakata, S., and Hirata, T.: Detrital zircon ages of Cambrian and Devonian sandstones from Estonia, central Baltica: a possible link to Avalonia during the Late Neoproterozoic, *GFF*, 136, 875 214–217, <https://doi.org/10.1080/11035897.2013.873986>, 2014.
- Poprawa, P., Šliaupa, S., Stephenson, R., and Lazauskien, J.: Late Vendian–Early Palaeozoic tectonic evolution of the Baltic Basin: regional tectonic implications from subsidence analysis, *Tectonophysics*, 314, 219–239, [https://doi.org/10.1016/s0040-1951\(99\)00245-0](https://doi.org/10.1016/s0040-1951(99)00245-0), 1999.



- Poprawa, P., Radkovets, N. and Rauball, J.: Ediacaran-Paleozoic subsidence history of the Volyn-Podillya-Moldavia Basin  
880 (W and SW Ukraine, Moldova, NE Romania), *Geological Quarterly*. <https://doi.org/10.7306/gq.1418>, 2018.
- Schulmann, K., Ledru, P., Autran, A., Melka, R., Lardeaux, J. M., Urban, M., and Lobkowicz, M.: Evolution of nappes in the  
eastern margin of the Bohemian Massif: a kinematic interpretation, *Geol Rundsch*, 80, 73–92,  
<https://doi.org/10.1007/bf01828768>, 1991.
- Schulmann, K., Konopásek, J., Janoušek, V., Lexa, O., Lardeaux, J.-M., Edel, J.-B., Štípská, P., and Ulrich, S.: An Andean  
885 type Palaeozoic convergence in the Bohemian Massif, *Comptes Rendus. Géoscience*, 341, 266–286,  
<https://doi.org/10.1016/j.crte.2008.12.006>, 2009.
- Schulmann, K., Lexa, O., Janoušek, V., Lardeaux, J. M., and Edel, J. B.: Anatomy of a diffuse cryptic suture zone: An example  
from the Bohemian Massif, *European Variscides, Geology*, 42, 275–278, <https://doi.org/10.1130/g35290.1>, 2014.
- Sláma, J.: Rare late Neoproterozoic detritus in SW Scandinavia as a response to distant tectonic processes, *Terra Nova*, 28,  
890 394–401, <https://doi.org/10.1111/ter.12232>, 2016.
- Sláma, J., Walderhaug, O., Fonneland, H., Kosler, J., and Pedersen, R. B.: Provenance of Neoproterozoic to upper Cretaceous  
sedimentary rocks, eastern Greenland: Implications for recognizing the sources of sediments in the Norwegian Sea,  
*Sedimentary Geology*, 238, 254–267, <https://doi.org/10.1016/j.sedgeo.2011.04.018>, 2011.
- Soejono, I., Žáčková, E., Janoušek, V., Machek, M., and Košler, J.: Vestige of an Early Cambrian incipient oceanic crust  
895 incorporated in the Variscan orogen: Letovice Complex, Bohemian Massif, *Journal of Geological Society*, 167, 1113–1130,  
<https://doi.org/10.1144/0016-76492009-180>, 2010.
- Soejono, I., Janoušek, V., Žáčková, E., Sláma, J., Konopásek, J., Machek, M., and Hanžl, P.: Long-lasting Cadomian magmatic  
activity along an active northern Gondwana margin: U–Pb zircon and Sr–Nd isotopic evidence from the Brunovistulian  
Domain, eastern Bohemian Massif, *Int J Earth Sci*, 106, 2109–2129, <https://doi.org/10.1007/s00531-016-1416-y>, 2016.
- 900 Soejono, I., Schulmann, K., Sláma, J., Hrdličková, K., Hanžl, P., Konopásek, J., Collett, S., and Míková, J.: Pre-collisional  
crustal evolution of the European Variscan periphery: Constraints from detrital zircon U–Pb ages and Hf isotopic record in the  
Precambrian metasedimentary basement of the Brunovistulian Domain, *Precambrian Research*, 372, 106606,  
<https://doi.org/10.1016/j.precamres.2022.106606>, 2022.
- Soejono, I., Collett, S., Kohút, M., Janoušek, V., Schulmann, K., Bukovská, Z., Novotná, N., Zelinková, T., Míková, J., Hora,  
905 J. M., and Veselovský, F.: Paleogeography of the Gondwana passive margin fragments involved in the Variscan and Alpine  
collisions: Perspectives from metavolcanic-sedimentary basement of the Western Carpathians, *Earth-Science Reviews*, 253,  
104763, <https://doi.org/10.1016/j.earscirev.2024.104763>, 2024.
- Sorger, D., Hauzenberger, C. A., Finger, F., and Linner, M.: Two generations of Variscan garnet: Implications from a  
petrochronological study of a high-grade Avalonia-derived paragneiss from the Drosendorf unit, Bohemian Massif, *Gondwana*  
910 *Research*, 85, 124–148, <https://doi.org/10.1016/j.gr.2020.04.004>, 2020.



- Strachan, R. A., Olierook, H. K. H., and Kirkland, C. L.: Evidence from the U–Pb–Hf signatures of detrital zircons for a Baltican provenance for basal Old Red Sandstone successions, northern Scottish Caledonides, *JGS*, 178, <https://doi.org/10.1144/jgs2020-241>, 2021.
- Strnad, L. and Mihaljevič, M.: Sedimentary provenance of Mid-Devonian clastic sediments in the Teplá-Barrandian Unit (Bohemian Massif): U–Pb and Pb–Pb geochronology of detrital zircons by laser ablation ICP-MS, *Mineralogy and Petrology*, 84, 47–68, <https://doi.org/10.1007/s00710-004-0057-1>, 2005.
- Suess, F. E.: Die moravischen Fenster und ihre Beziehung zum Grundgebirge des Hohen Gesenke, *Denkschriften der öster Akad der Wiss Math Nat* 88, 541–631, 1912.
- Tabaud, A. S., Štípská, P., Mazur, S., Schulmann, K., Míková, J., Wong, J., and Sun, M.: Evolution of a Cambro-Ordovician active margin in northern Gondwana: Geochemical and zircon geochronological evidence from the Góry Sowie metasedimentary rocks, Poland, *Gondwana Research*, 90, 1–26, <https://doi.org/10.1016/j.gr.2020.10.011>, 2021.
- Timmerman, M. J., Krmíček, L., Krmíčková, S., Sláma, J., Sudo, M., and Sobel, E.: Tonian–Ediacaran evolution of the Brunovistulian microcontinent (Czech Republic) deciphered from LA-ICP-MS U–Pb zircon and  $40\text{Ar}/39\text{Ar}$  muscovite ages, *Precambrian Research*, 387, 106981, <https://doi.org/10.1016/j.precamres.2023.106981>, 2023.
- Vavrdová, M. and Dašková, J.: Middle Devonian palynomorphs from southern Moravia: an evidence of rapid change from terrestrial deltaic plain to carbonate platform conditions, *Geologica Carpathica*, 62, 109–119, <https://doi.org/10.2478/v10096-011-0010-2>, 2011.
- Vermeesch, P.: Multi-sample comparison of detrital age distributions, *Chemical Geology*, 341, 140–146, <https://doi.org/10.1016/j.chemgeo.2013.01.010>, 2013.
- Vermeesch, P.: On the treatment of discordant detrital zircon U–Pb data, *Geochronology*, 3, 247–257, <https://doi.org/10.5194/gchron-3-247-2021>, 2021.
- Waldron, J. W. F., DuFrane, S. A., Schofield, D. I., and Barr, S. M.: Is Britain divided by an Acadian suture?, *Geology*, 53, 847–852, <https://doi.org/10.1130/g53431.1>, 2025.
- Wojewoda, J., Nehyba, S., Gilíková, H. and Buriánek, D.: The sedimentary environment of Devonian siliciclastics in the Babí lom locality (Brunovistulian Platform cover, Southern Moravia, Czech Republic), *Geological Quarterly*, 59, 229–238, <https://doi.org/10.7306/gq.1205>, 2015.
- Yilmazer, S., Topuz, G., Guillong, M., Okay, A. I., Demirkaya, İ., and Uzun, F.: Revealing the early geological history of the Istanbul Zone (Far-East Avalonia) through zircon U–Pb–Hf isotopic data, *Precambrian Research*, 427, 107855, <https://doi.org/10.1016/j.precamres.2025.107855>, 2025.
- Žák, J. and Sláma, J.: How far did the Cadomian ‘terrane’ travel from Gondwana during early Palaeozoic? A critical reappraisal based on detrital zircon geochronology, *International Geology Review*, 60, 319–338, <https://doi.org/10.1080/00206814.2017.1334599>, 2018.
- Žák, J., Svojtka, M., Gerdjikov, I., Ackerman, L., Kachlík, V., Sláma, J., Vangelov, D. A., Kounov, A., Nance, R. D., Murphy, J. B., and Míková, J.: Enigmatic granite–gneiss domes within the Balkan fold-and-thrust belt, Bulgaria: Tracers of Gondwana–

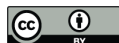

- 945 Baltica proximity and large-scale terrane displacement during the waning stages of the Cadomian orogeny?, *Gondwana Research*, 151, 36–57, <https://doi.org/10.1016/j.j.gr.2025.10.007>, 2026.  
Zeh, A. and Gerdes, A.: Baltica- and Gondwana-derived sediments in the Mid-German Crystalline Rise (Central Europe): Implications for the closure of the Rheic ocean, *Gondwana Research*, 17, 254–263, <https://doi.org/10.1016/j.j.gr.2009.08.004>, 2010.
- 950 Żelazniewicz, A. and Fanning, C. M.: Neoproterozoic to Paleoproterozoic fragments in the Brunovistulia terrane, S Poland: a component of the Columbia Supercontinent?, *Geological Quarterly*, 64, <https://doi.org/10.7306/gq.1515>, 2020.  
Zukalová, V. and Chlupac, I.: Stratigraphic classification of nonmetamorphic Devonian of the Moravo–Silesian region, *Cas Mineral Geol*, 9, 225–247, 1982.
